# Supplementary material for: Modelling genetic variation effects in plant gene regulatory networks using transfer learning on genomic and transcription factor binding data
Source: Research Square preprint supplement (doi:10.21203/rs.3.rs-6247751/v1), 2025-04-10
Supplement: Supplementary file 1 [file 3ce9b948d5c670ea2f022135.xlsx]

## Sheet: confusion matrix Fig2a
	ABI3VP1_tnt	AP2EREBP_tnt	ARF_ecoli	ARF_tnt	ARID_tnt	BBRBPC_tnt	BES1_tnt	BZR_tnt	C2C2YABBY_tnt	C2C2dof_tnt	C2C2gata_tnt	C2H2_tnt	C3H_tnt	CAMTA_tnt	CPP_tnt	E2FDP_tnt	EIL_tnt	FAR1_tnt	G2like_tnt	GRF_tnt	GeBP_tnt	HB_tnt	HSF_tnt	Homeobox_ecoli	Homeobox_tnt	LOBAS2_tnt	MADS_tnt	MYB_tnt	MYBrelated_tnt	NAC_tnt	ND_tnt	Orphan_tnt	RAV_tnt	REM_tnt	RWPRK_tnt	S1Falike_tnt	SBP_tnt	SRS_tnt	TCP_tnt	Trihelix_tnt	WRKY_tnt	ZFHD_tnt	bHLH_tnt	bZIP_tnt	mTERF_tnt	zfGRF_tnt
ABI3VP1_tnt	11	1	1	0	0	0	0	0	0	4	1	1	1	0	2	0	0	0	3	0	0	4	1	0	2	1	0	3	5	2	0	2	0	6	0	0	1	0	0	2	2	3	1	1	0	0
AP2EREBP_tnt	0	59	1	0	0	0	0	0	0	1	1	1	0	0	0	0	0	0	2	0	0	1	1	0	1	2	0	3	2	2	0	0	0	0	0	0	1	0	0	2	1	1	2	3	1	0
ARF_ecoli	0	1	29	0	0	0	0	0	0	2	1	3	1	0	1	0	0	0	2	0	0	2	1	0	2	1	0	4	3	2	0	0	0	1	0	0	1	0	0	1	2	2	2	2	0	0
ARF_tnt	0	2	3	0	0	1	0	0	0	3	1	2	1	0	2	0	0	0	3	0	0	3	1	0	2	2	0	4	4	2	0	1	0	2	0	0	1	0	0	1	2	3	3	2	0	0
ARID_tnt	0	0	0	0	20	0	0	0	0	2	1	0	0	0	6	0	0	0	2	0	0	6	0	3	6	0	0	2	4	0	0	0	0	3	0	0	0	0	0	2	1	8	0	0	0	0
BBRBPC_tnt	0	1	0	0	0	59	0	0	0	2	1	1	0	0	0	0	0	0	2	0	0	1	1	0	1	1	0	2	3	2	2	0	0	0	0	0	0	0	0	1	1	1	1	1	0	0
BES1_tnt	0	1	0	0	0	0	32	5	0	1	0	1	0	0	1	0	0	0	1	0	0	1	0	0	1	1	0	3	2	3	0	0	0	1	0	0	1	0	0	1	1	1	6	6	0	0
BZR_tnt	0	1	0	0	0	0	1	50	0	1	0	0	0	0	0	0	0	0	1	0	0	1	0	0	1	1	0	2	2	2	0	0	0	0	0	0	1	0	0	1	1	1	6	5	0	0
C2C2YABBY_tnt	0	1	1	0	0	0	0	0	4	2	1	2	1	0	1	0	0	0	3	0	1	8	0	2	7	0	0	3	5	2	0	0	0	1	0	0	1	1	0	1	1	6	1	2	0	0
C2C2dof_tnt	0	0	0	0	0	0	0	0	0	59	0	1	2	0	1	0	0	0	2	0	0	2	0	0	1	1	0	2	2	2	0	3	0	2	0	0	1	0	0	1	1	1	1	1	0	0
C2C2gata_tnt	0	1	0	0	0	0	0	0	0	1	53	1	0	0	1	0	0	0	3	0	0	2	1	0	1	2	0	2	4	1	0	0	0	0	0	0	1	0	0	1	1	1	1	2	0	0
C2H2_tnt	0	1	1	0	0	1	0	0	0	2	1	23	1	0	1	0	0	0	3	0	0	2	1	0	2	2	0	4	4	2	0	1	0	1	0	0	1	1	0	1	2	2	2	2	0	0
C3H_tnt	0	1	0	0	0	0	0	0	0	2	0	1	32	0	1	0	0	0	2	0	0	2	1	0	1	2	0	3	3	3	0	3	0	1	0	0	1	0	0	2	2	2	1	1	0	0
CAMTA_tnt	0	2	0	0	0	1	1	2	0	2	1	1	1	4	1	2	0	1	3	0	0	2	1	0	1	3	0	6	2	6	0	0	0	1	0	0	1	0	0	2	1	2	5	5	1	0
CPP_tnt	0	0	0	0	1	0	0	0	0	2	0	0	0	0	59	0	0	0	1	0	0	3	0	1	2	0	0	2	3	1	0	1	0	2	0	0	0	0	0	1	1	4	0	0	0	0
E2FDP_tnt	0	3	0	0	0	0	0	0	0	2	0	0	0	0	1	40	0	0	2	0	0	1	1	0	1	4	0	6	3	1	0	0	0	1	0	0	1	0	0	2	1	1	1	2	1	0
EIL_tnt	0	2	1	0	0	1	0	0	0	4	1	2	1	0	2	0	0	0	4	0	0	4	0	0	2	1	0	3	6	2	0	1	0	1	0	1	1	1	0	1	2	4	2	2	0	0
FAR1_tnt	0	2	0	0	0	1	2	3	0	1	0	0	0	0	0	4	0	21	2	0	0	1	1	0	0	6	0	6	1	6	0	0	0	0	0	0	1	0	0	2	1	1	8	6	1	0
G2like_tnt	0	1	0	0	0	0	0	0	0	2	1	1	0	0	1	0	0	0	59	0	0	2	1	0	2	1	0	2	3	1	0	0	0	1	0	0	1	0	0	1	1	2	1	1	0	0
GRF_tnt	0	2	3	0	0	0	0	0	0	2	1	3	1	0	0	0	0	0	4	2	0	1	1	0	1	2	0	4	4	2	0	0	0	1	0	0	1	0	0	1	2	1	1	8	0	0
GeBP_tnt	0	1	0	0	0	0	0	0	0	2	2	1	1	0	1	0	0	0	3	0	29	3	1	0	2	1	0	3	3	2	0	0	0	0	0	0	1	1	0	1	1	2	1	2	0	0
HB_tnt	0	0	0	0	0	0	0	0	0	1	0	1	0	0	1	0	0	0	1	0	0	58	0	1	5	0	0	2	3	1	0	0	0	1	0	0	0	0	0	1	1	4	1	1	0	0
HSF_tnt	0	1	0	0	0	0	0	0	0	1	1	1	0	0	0	0	0	0	3	0	0	1	46	0	1	2	0	3	3	2	0	0	0	0	0	2	1	0	0	1	1	1	1	2	0	0
Homeobox_ecoli	0	0	0	0	2	0	0	0	0	2	0	0	1	0	3	0	0	0	1	0	0	7	0	26	8	0	0	2	4	1	0	1	0	2	0	0	0	0	0	1	1	7	0	1	0	0
Homeobox_tnt	0	0	0	0	0	0	0	0	0	2	0	1	0	0	2	0	0	0	2	0	0	6	0	1	44	0	0	2	3	1	0	1	0	1	0	0	1	0	0	1	1	5	1	1	0	0
LOBAS2_tnt	0	2	0	0	0	0	0	0	0	1	1	1	1	0	0	0	0	0	3	0	0	1	1	0	1	47	0	3	3	2	0	0	0	0	0	0	1	0	0	2	1	1	2	3	1	0
MADS_tnt	0	1	1	0	0	1	0	0	0	4	1	2	1	0	1	0	0	0	4	0	0	3	1	0	2	2	0	5	5	3	0	1	0	2	0	0	1	1	0	2	2	2	2	2	0	0
MYB_tnt	0	1	0	0	0	0	0	0	0	2	1	2	0	0	1	0	0	0	2	0	0	2	1	0	2	1	0	50	3	2	0	0	0	1	0	0	1	1	0	1	1	2	1	2	0	0
MYBrelated_tnt	0	1	0	0	0	0	0	0	0	2	1	1	0	0	1	0	0	0	2	0	1	2	1	0	2	1	0	2	58	1	0	0	0	1	0	0	0	1	0	1	1	2	1	1	0	0
NAC_tnt	0	1	0	0	0	0	0	0	0	2	1	2	1	0	1	0	0	0	2	0	0	2	1	0	1	2	0	4	3	38	0	1	0	1	0	0	1	0	0	1	2	1	2	2	0	0
ND_tnt	1	1	0	0	3	1	0	0	0	3	0	0	0	0	3	0	0	0	2	0	0	4	0	2	4	1	0	2	4	1	19	1	0	4	0	0	0	0	0	1	1	5	1	1	0	0
Orphan_tnt	0	1	0	0	0	0	0	0	0	1	0	1	3	0	2	0	0	0	2	0	0	2	0	0	1	1	0	2	3	3	0	37	0	2	0	0	1	0	0	2	2	2	1	1	0	0
RAV_tnt	0	1	2	0	0	1	0	0	0	3	1	2	1	0	1	0	0	0	3	0	0	4	1	0	2	1	0	6	5	2	0	0	0	2	0	0	1	1	0	1	2	3	1	2	0	0
REM_tnt	1	0	0	0	0	0	0	0	0	3	0	0	1	0	2	0	0	0	1	0	0	3	0	0	2	0	0	2	3	1	0	1	0	52	0	0	0	0	0	1	1	3	0	1	0	0
RWPRK_tnt	0	3	1	0	0	1	0	0	0	3	2	2	1	0	1	0	0	0	4	0	0	2	1	0	1	3	0	5	4	3	0	0	0	1	0	0	1	1	0	2	3	1	2	4	0	0
S1Falike_tnt	0	1	0	0	0	0	0	0	0	1	1	1	0	0	0	0	0	0	4	0	0	1	3	0	1	2	0	3	3	1	0	0	0	0	0	35	1	0	0	1	1	1	1	1	0	0
SBP_tnt	0	1	0	0	0	0	0	0	0	1	0	1	1	0	1	0	0	0	2	0	0	1	1	0	1	1	0	3	2	2	0	0	0	1	0	0	54	0	0	1	1	1	3	2	0	0
SRS_tnt	0	1	0	0	0	0	0	0	0	2	1	2	0	0	1	0	0	0	3	0	0	2	1	0	2	1	0	4	7	2	0	0	0	1	0	0	1	34	0	1	1	1	1	2	0	0
TCP_tnt	0	2	1	0	0	1	0	1	0	3	1	2	1	0	1	0	0	0	3	0	0	3	1	0	1	3	0	6	4	3	0	1	0	1	0	0	2	1	0	1	2	1	4	4	0	0
Trihelix_tnt	0	1	0	0	0	0	0	0	0	2	1	1	1	0	1	0	0	0	2	0	0	2	1	0	2	2	0	4	4	2	0	1	0	1	0	0	1	1	0	31	2	3	1	2	0	0
WRKY_tnt	0	1	0	0	0	0	0	0	0	2	0	1	1	0	1	0	0	0	2	0	0	1	1	0	1	1	0	3	2	1	0	1	0	1	0	0	1	0	0	1	59	1	1	1	0	0
ZFHD_tnt	0	0	0	0	0	0	0	0	0	2	0	1	0	0	2	0	0	0	2	0	0	4	0	1	5	0	0	3	4	1	0	1	0	1	0	0	0	0	0	1	1	51	1	1	0	0
bHLH_tnt	0	1	1	0	0	0	0	1	0	1	0	1	0	0	0	0	0	0	2	0	0	1	1	0	1	1	0	3	2	2	0	0	0	0	0	0	1	0	0	1	1	1	51	3	0	0
bZIP_tnt	0	1	0	0	0	0	0	1	0	1	1	1	0	0	0	0	0	0	2	0	0	1	1	0	1	2	0	3	2	3	0	0	0	0	0	0	1	0	0	1	1	1	2	53	0	0
mTERF_tnt	0	0	0	0	0	1	0	0	0	1	1	0	0	0	0	0	0	0	2	0	0	0	0	0	0	5	0	5	1	5	0	0	0	0	0	0	0	0	0	4	1	0	3	7	31	0
zfGRF_tnt	0	1	1	0	0	0	0	0	0	2	0	0	1	0	1	0	0	0	1	0	0	2	1	0	2	1	0	4	3	2	0	1	0	0	0	0	1	0	0	2	0	2	2	3	0	31

## Sheet: Sensitivity per family Fig2b
Supplementary table 2 - Multi-class prediction sensitivity per TF family
TF	sensitivity	Total Bound (true label)	Predicted Bound (predicted label)
ABI3VP1_tnt	0.167426	31626	5295
AP2EREBP_tnt	0.887987	242561	215391
ARF_ecoli	0.370156	26659	9868
ARF_tnt	0.00317488	11654	37
ARID_tnt	0.321633	10683	3436
BBRBPC_tnt	0.73617	17697	13028
BES1_tnt	0.517557	4585	2373
bHLH_tnt	0.689519	70497	48609
bZIP_tnt	0.796008	139241	110837
BZR_tnt	0.718109	12033	8641
C2C2dof_tnt	0.914801	323888	296293
C2C2gata_tnt	0.710741	23332	16583
C2C2YABBY_tnt	0.0650469	9178	597
C2H2_tnt	0.378631	130985	49595
C3H_tnt	0.497231	35394	17599
CAMTA_tnt	0.0654074	3547	232
CPP_tnt	0.858397	64469	55340
E2FDP_tnt	0.570339	7471	4261
EIL_tnt	0	1209	0
FAR1_tnt	0.360502	957	345
G2like_tnt	0.862862	171542	148017
GeBP_tnt	0.386391	11654	4503
GRF_tnt	0.0252781	8901	225
HB_tnt	0.883733	163210	144234
Homeobox_ecoli	0.418326	10750	4497
Homeobox_tnt	0.685333	70001	47974
HSF_tnt	0.722393	60989	44058
LOBAS2_tnt	0.723478	74721	54059
MADS_tnt	0	36483	0
mTERF_tnt	0.460277	5551	2555
MYB_tnt	0.787135	301999	237714
MYBrelated_tnt	0.832279	275928	229649
NAC_tnt	0.739563	388132	287048
ND_tnt	0.281161	7750	2179
Orphan_tnt	0.484638	19008	9212
RAV_tnt	0	14713	0
REM_tnt	0.713765	40334	28789
RWPRK_tnt	0	11108	0
S1Falike_tnt	0.407009	7818	3182
SBP_tnt	0.773788	64086	49589
SRS_tnt	0.434195	11329	4919
TCP_tnt	0	11203	0
Trihelix_tnt	0.534575	89125	47644
WRKY_tnt	0.863316	157985	136391
zfGRF_tnt	0.434369	2415	1049
ZFHD_tnt	0.828161	160290	132746
