# Supplementary material for: Modelling genetic variation effects in plant gene regulatory networks using transfer learning on genomic and transcription factor binding data
Source: Research Square preprint supplement (doi:10.21203/rs.3.rs-6247751/v1), 2025-04-10
Supplement: Supplementary file 2 [file 408295258317436078e98cec.xlsx]

## Sheet: MOA seq peaks Arabidopsis thali
Chr1	85	503	Ara_M5_peak_1	159	.	2.3556	17.4594	15.9876	238
Chr1	906	983	Ara_M5_peak_2	53	.	1.72989	6.50795	5.33121	21
Chr1	1299	2181	Ara_M5_peak_3	241	.	2.72366	25.7786	24.1511	128
Chr1	2367	3308	Ara_M5_peak_4	846	.	4.68295	87.0053	84.6073	799
Chr1	3464	3655	Ara_M5_peak_5	553	.	3.7668	57.3848	55.3143	147
Chr1	4325	4611	Ara_M5_peak_6	285	.	2.73587	30.1998	28.5019	32
Chr1	5754	5944	Ara_M5_peak_7	192	.	2.32884	20.8227	19.286	105
Chr1	6224	6352	Ara_M5_peak_8	114	.	1.98438	12.7853	11.4194	33
Chr1	6555	6921	Ara_M5_peak_9	74	.	1.78092	8.66853	7.42146	25
Chr1	8047	8110	Ara_M5_peak_10	53	.	1.69483	6.55742	5.37988	18
Chr1	8497	8581	Ara_M5_peak_11	23	.	1.45432	3.37032	2.35014	19
Chr1	8707	9235	Ara_M5_peak_12	564	.	3.72089	58.5631	56.4782	98
Chr1	9736	10178	Ara_M5_peak_13	372	.	3.05131	39.0457	37.2148	188
Chr1	13604	13878	Ara_M5_peak_14	819	.	4.52817	84.3372	81.9666	219
Chr1	14002	14347	Ara_M5_peak_15	248	.	2.74941	26.5044	24.8671	222
Chr1	14723	15093	Ara_M5_peak_16	364	.	3.20214	38.3099	36.4879	211
Chr1	15479	15685	Ara_M5_peak_17	51	.	1.70436	6.34312	5.17479	87
Chr1	15910	16282	Ara_M5_peak_18	254	.	2.6793	27.1325	25.4823	147
Chr1	16487	16980	Ara_M5_peak_19	260	.	2.6317	27.6953	26.0366	249
Chr1	19419	19490	Ara_M5_peak_20	82	.	1.85774	9.57376	8.29423	31
Chr1	20223	21847	Ara_M5_peak_21	1347	.	5.67525	137.553	134.711	356
Chr1	22033	22804	Ara_M5_peak_22	231	.	2.68094	24.8009	23.1933	690
Chr1	22995	23062	Ara_M5_peak_23	68	.	1.83488	8.11493	6.88101	18
Chr1	28528	28674	Ara_M5_peak_24	79	.	1.91393	9.26123	7.99082	116
Chr1	29019	29149	Ara_M5_peak_25	107	.	2.07955	12.0863	10.7376	12
Chr1	30882	31020	Ara_M5_peak_26	74	.	1.87712	8.67705	7.42486	127
Chr1	32755	32835	Ara_M5_peak_27	55	.	1.7483	6.76402	5.57757	53
Chr1	33081	33904	Ara_M5_peak_28	1198	.	5.42999	122.597	119.873	362
Chr1	37876	38510	Ara_M5_peak_29	2033	.	7.31948	206.589	203.342	399
Chr1	39387	39612	Ara_M5_peak_30	66	.	1.82191	7.83174	6.60726	33
Chr1	40917	41028	Ara_M5_peak_31	24	.	1.47587	3.49933	2.46901	26
Chr1	43199	43278	Ara_M5_peak_32	120	.	2.15317	13.4407	12.0584	42
Chr1	44224	44558	Ara_M5_peak_33	58	.	1.7667	7.02448	5.82844	182
Chr1	44707	45092	Ara_M5_peak_34	748	.	4.41675	77.1756	74.8781	284
Chr1	45351	45450	Ara_M5_peak_35	79	.	1.91393	9.26123	7.99082	64
Chr1	46732	47057	Ara_M5_peak_36	162	.	2.30463	17.682	16.2079	179
Chr1	47265	47461	Ara_M5_peak_37	99	.	1.96924	11.2385	9.91387	103
Chr1	49248	49434	Ara_M5_peak_38	308	.	2.86227	32.6347	30.8991	117
Chr1	49669	50233	Ara_M5_peak_39	610	.	3.82464	63.1804	61.0434	251
Chr1	51211	52198	Ara_M5_peak_40	531	.	3.44605	55.1911	53.148	671
Chr1	52761	52993	Ara_M5_peak_41	205	.	2.38673	22.0854	20.5253	31
Chr1	55299	55677	Ara_M5_peak_42	1033	.	4.67258	105.884	103.306	193
Chr1	56584	56798	Ara_M5_peak_43	1081	.	4.7243	110.744	108.123	87
Chr1	57073	57427	Ara_M5_peak_44	605	.	3.66277	62.6612	60.5274	89
Chr1	59691	59749	Ara_M5_peak_45	242	.	2.48394	25.8382	24.2103	36
Chr1	59899	60088	Ara_M5_peak_46	209	.	2.37089	22.5568	20.9885	150
Chr1	60248	60322	Ara_M5_peak_47	24	.	1.42724	3.52932	2.4983	64
Chr1	60656	60745	Ara_M5_peak_48	73	.	1.80217	8.57215	7.3265	42
Chr1	60870	60953	Ara_M5_peak_49	31	.	1.50305	4.17581	3.10982	5
Chr1	61122	61798	Ara_M5_peak_50	683	.	3.9251	70.5789	68.3566	188
Chr1	62081	62207	Ara_M5_peak_51	166	.	2.31599	18.092	16.6098	103
Chr1	62452	62665	Ara_M5_peak_52	116	.	2.09576	13.0625	11.6933	147
Chr1	63189	63256	Ara_M5_peak_53	77	.	1.83209	9.0274	7.76522	13
Chr1	63916	64323	Ara_M5_peak_54	215	.	2.35951	23.0916	21.5146	206
Chr1	67596	68084	Ara_M5_peak_55	558	.	3.53362	57.973	55.8953	144
Chr1	68218	69051	Ara_M5_peak_56	1491	.	5.75417	152.117	149.171	706
Chr1	69281	69352	Ara_M5_peak_57	119	.	2.06294	13.3497	11.9729	21
Chr1	69817	69934	Ara_M5_peak_58	161	.	2.25577	17.6205	16.1471	31
Chr1	72114	72424	Ara_M5_peak_59	799	.	4.12729	82.2614	79.9121	170
Chr1	73956	74038	Ara_M5_peak_60	33	.	1.53384	4.38002	3.30313	13
Chr1	74694	75083	Ara_M5_peak_61	581	.	3.81019	60.2779	58.1721	321
Chr1	75214	75544	Ara_M5_peak_62	276	.	2.80252	29.3638	27.6801	184
Chr1	76453	76589	Ara_M5_peak_63	458	.	3.38347	47.808	45.8586	48
Chr1	77532	77864	Ara_M5_peak_64	1508	.	5.93327	153.804	150.847	114
Chr1	78240	78320	Ara_M5_peak_65	33	.	1.52889	4.40295	3.32319	36
Chr1	80492	80681	Ara_M5_peak_66	114	.	2.08242	12.7847	11.4188	106
Chr1	81062	81163	Ara_M5_peak_67	247	.	2.64276	26.3603	24.7241	46
Chr1	81803	82081	Ara_M5_peak_68	1556	.	5.84198	158.649	155.66	114
Chr1	83374	83481	Ara_M5_peak_69	42	.	1.60318	5.34129	4.21408	84
Chr1	84992	85148	Ara_M5_peak_70	38	.	1.55225	4.90938	3.8027	145
Chr1	85502	85640	Ara_M5_peak_71	360	.	2.96803	37.8416	36.0266	84
Chr1	86046	86222	Ara_M5_peak_72	69	.	1.76553	8.15891	6.92434	46
Chr1	86518	86746	Ara_M5_peak_73	1849	.	6.32181	188.08	184.917	129
Chr1	87242	87692	Ara_M5_peak_74	91	.	1.92561	10.4866	9.18073	340
Chr1	88198	88324	Ara_M5_peak_75	55	.	1.69634	6.68101	5.50142	99
Chr1	88449	88941	Ara_M5_peak_76	857	.	4.46914	88.1967	85.786	380
Chr1	90578	90646	Ara_M5_peak_77	54	.	1.70767	6.59662	5.41843	42
Chr1	91191	91413	Ara_M5_peak_78	678	.	4.0784	70.0991	67.8794	109
Chr1	91586	91660	Ara_M5_peak_79	54	.	1.72658	6.5853	5.40729	55
Chr1	95571	95997	Ara_M5_peak_80	129	.	2.15724	14.3151	12.9143	146
Chr1	97265	97482	Ara_M5_peak_81	242	.	2.67717	25.8416	24.2136	47
Chr1	98736	98794	Ara_M5_peak_82	83	.	1.87967	9.65107	8.37051	34
Chr1	99044	99863	Ara_M5_peak_83	1643	.	6.05265	167.4	164.356	206
Chr1	101913	102090	Ara_M5_peak_84	542	.	3.41373	56.3245	54.2674	65
Chr1	102744	102995	Ara_M5_peak_85	182	.	2.2014	19.7544	18.2397	156
Chr1	103733	103848	Ara_M5_peak_86	204	.	2.2672	22.0196	20.4601	95
Chr1	104003	104286	Ara_M5_peak_87	199	.	2.23311	21.4555	19.909	109
Chr1	104550	104700	Ara_M5_peak_88	96	.	1.86028	10.9433	9.627	101
Chr1	105340	105414	Ara_M5_peak_89	221	.	2.40785	23.7458	22.1551	37
Chr1	105742	105871	Ara_M5_peak_90	53	.	1.64035	6.54794	5.37055	16
Chr1	106254	106517	Ara_M5_peak_91	554	.	3.42748	57.5381	55.4667	143
Chr1	107319	108036	Ara_M5_peak_92	2063	.	6.43934	209.568	206.31	379
Chr1	108884	109104	Ara_M5_peak_93	263	.	2.57841	28.0557	26.3903	107
Chr1	111587	111678	Ara_M5_peak_94	37	.	1.52548	4.86716	3.76128	40
Chr1	112081	112517	Ara_M5_peak_95	404	.	2.98644	42.3153	40.4394	240
Chr1	112696	112949	Ara_M5_peak_96	309	.	2.85346	32.6521	30.9164	164
Chr1	113888	114285	Ara_M5_peak_97	1152	.	5.21234	117.981	115.296	313
Chr1	115546	115744	Ara_M5_peak_98	69	.	1.77951	8.21732	6.9819	80
Chr1	116070	117039	Ara_M5_peak_99	731	.	4.03728	75.4539	73.1764	889
Chr1	118471	119243	Ara_M5_peak_100	337	.	3.05004	35.5387	33.7588	483
Chr1	119706	119764	Ara_M5_peak_101	90	.	1.97621	10.3377	9.03844	23
Chr1	120496	120834	Ara_M5_peak_102	339	.	3.11013	35.762	33.9768	165
Chr1	121118	121211	Ara_M5_peak_103	20	.	1.43544	3.04053	2.0357	1
Chr1	121440	121506	Ara_M5_peak_104	137	.	2.24518	15.2152	13.7917	25
Chr1	124629	124728	Ara_M5_peak_105	41	.	1.63788	5.29471	4.16835	26
Chr1	128332	128507	Ara_M5_peak_106	71	.	1.85872	8.39112	7.14807	72
Chr1	129218	129282	Ara_M5_peak_107	33	.	1.56427	4.40718	3.32319	13
Chr1	130289	130383	Ara_M5_peak_108	58	.	1.7667	7.02448	5.82844	88
Chr1	130519	131560	Ara_M5_peak_109	1071	.	5.2817	109.813	107.198	246
Chr1	131760	131936	Ara_M5_peak_110	505	.	3.56163	52.5579	50.5456	62
Chr1	135823	136147	Ara_M5_peak_111	987	.	4.79412	101.265	98.727	275
Chr1	137974	138422	Ara_M5_peak_112	1102	.	5.09233	112.864	110.224	364
Chr1	139877	140152	Ara_M5_peak_113	137	.	2.15955	15.1694	13.7507	200
Chr1	140275	140607	Ara_M5_peak_114	419	.	3.24148	43.8305	41.9331	232
Chr1	140787	140902	Ara_M5_peak_115	34	.	1.54596	4.57665	3.48922	4
Chr1	141587	142063	Ara_M5_peak_116	747	.	4.17867	77.0042	74.7114	428
Chr1	142952	143227	Ara_M5_peak_117	179	.	2.3324	19.4326	17.921	105
Chr1	143375	143576	Ara_M5_peak_118	1345	.	5.72241	137.377	134.535	101
Chr1	145769	146106	Ara_M5_peak_119	355	.	3.10816	37.3222	35.5147	68
Chr1	146243	146536	Ara_M5_peak_120	542	.	3.73719	56.3241	54.2671	182
Chr1	146906	147111	Ara_M5_peak_121	79	.	1.91393	9.26123	7.99082	182
Chr1	147830	148051	Ara_M5_peak_122	315	.	3.01811	33.2777	31.5296	156
Chr1	148182	148267	Ara_M5_peak_123	79	.	1.91393	9.26123	7.99082	53
Chr1	148891	149407	Ara_M5_peak_124	203	.	2.55803	21.8817	20.3234	306
Chr1	149734	149903	Ara_M5_peak_125	50	.	1.71149	6.2563	5.08942	13
Chr1	154482	154608	Ara_M5_peak_126	44	.	1.65565	5.57093	4.43342	5
Chr1	155459	155562	Ara_M5_peak_127	36	.	1.56935	4.73642	3.63939	93
Chr1	155988	157037	Ara_M5_peak_128	925	.	4.75259	95.0211	92.5428	495
Chr1	157391	157471	Ara_M5_peak_129	99	.	1.99553	11.2578	9.93296	36
Chr1	158581	159192	Ara_M5_peak_130	515	.	3.44753	53.6116	51.5891	456
Chr1	159350	159932	Ara_M5_peak_131	856	.	4.36059	88.0379	85.628	89
Chr1	160087	160187	Ara_M5_peak_132	29	.	1.49449	4.05671	2.99329	9
Chr1	162685	163427	Ara_M5_peak_133	812	.	4.41332	83.6141	81.2507	640
Chr1	166134	166479	Ara_M5_peak_134	117	.	2.13476	13.0966	11.7226	319
Chr1	166649	166774	Ara_M5_peak_135	74	.	1.87712	8.67705	7.42486	11
Chr1	167893	168593	Ara_M5_peak_136	1226	.	5.58343	125.377	122.631	579
Chr1	172113	172295	Ara_M5_peak_137	107	.	1.9833	12.1	10.7512	32
Chr1	172832	172986	Ara_M5_peak_138	194	.	2.36509	20.9577	19.4197	103
Chr1	173150	173717	Ara_M5_peak_139	1124	.	5.01727	115.134	112.474	147
Chr1	174116	174207	Ara_M5_peak_140	198	.	2.37647	21.4023	19.8563	37
Chr1	175060	175128	Ara_M5_peak_141	123	.	2.03108	13.771	12.385	37
Chr1	175680	175764	Ara_M5_peak_142	227	.	2.4453	24.3077	22.7082	27
Chr1	176049	176170	Ara_M5_peak_143	237	.	2.47852	25.3268	23.7109	27
Chr1	176899	177209	Ara_M5_peak_144	243	.	2.51446	25.995	24.3657	53
Chr1	178271	178398	Ara_M5_peak_145	95	.	1.8629	10.843	9.52795	26
Chr1	178754	179347	Ara_M5_peak_146	1456	.	5.38731	148.56	145.636	322
Chr1	179466	179608	Ara_M5_peak_147	26	.	1.43861	3.72606	2.68355	26
Chr1	180158	180406	Ara_M5_peak_148	86	.	1.81353	9.95989	8.67036	198
Chr1	182194	182781	Ara_M5_peak_149	1663	.	5.80117	169.403	166.347	479
Chr1	183180	183685	Ara_M5_peak_150	704	.	3.80488	72.7052	70.457	44
Chr1	184437	184934	Ara_M5_peak_151	1372	.	5.64948	140.153	137.291	401
Chr1	186659	187184	Ara_M5_peak_152	826	.	4.34762	85.0126	82.6349	353
Chr1	190145	190535	Ara_M5_peak_153	266	.	2.75823	28.2928	26.6254	203
Chr1	192422	192634	Ara_M5_peak_154	188	.	2.40977	20.4228	18.8938	68
Chr1	194291	194492	Ara_M5_peak_155	2320	.	7.05008	235.421	232.073	75
Chr1	194616	195790	Ara_M5_peak_156	817	.	4.10907	84.1365	81.7668	961
Chr1	196909	197045	Ara_M5_peak_157	139	.	2.08695	15.4065	13.981	116
Chr1	198406	199003	Ara_M5_peak_158	665	.	3.73208	68.719	66.5177	119
Chr1	199349	199746	Ara_M5_peak_159	554	.	3.49938	57.4827	55.4116	289
Chr1	201616	202093	Ara_M5_peak_160	352	.	2.99502	37.0424	35.2406	396
Chr1	202952	203060	Ara_M5_peak_161	36	.	1.52053	4.7401	3.64301	92
Chr1	204360	204630	Ara_M5_peak_162	389	.	3.07344	40.8302	38.9756	55
Chr1	206351	206781	Ara_M5_peak_163	629	.	3.75267	65.0789	62.9165	111
Chr1	207013	207269	Ara_M5_peak_164	329	.	2.9285	34.7159	32.9494	212
Chr1	207515	208136	Ara_M5_peak_165	2498	.	7.82343	253.233	249.837	92
Chr1	210532	210788	Ara_M5_peak_166	470	.	3.33358	49.0623	47.0974	190
Chr1	212623	213141	Ara_M5_peak_167	641	.	4.1039	66.3142	64.1375	249
Chr1	214849	215011	Ara_M5_peak_168	82	.	1.93233	9.5594	8.28007	33
Chr1	215192	215355	Ara_M5_peak_169	291	.	2.9261	30.8589	29.1483	50
Chr1	215476	215582	Ara_M5_peak_170	88	.	1.96913	10.1677	8.87068	82
Chr1	217379	217608	Ara_M5_peak_171	207	.	2.57644	22.3027	20.7366	114
Chr1	218713	219049	Ara_M5_peak_172	171	.	2.41081	18.6268	17.1312	303
Chr1	219655	219794	Ara_M5_peak_173	195	.	2.52123	21.0491	19.5063	48
Chr1	220029	220249	Ara_M5_peak_174	250	.	2.76047	26.6769	25.0342	30
Chr1	220887	221168	Ara_M5_peak_175	70	.	1.82114	8.28772	7.05129	97
Chr1	222501	222574	Ara_M5_peak_176	18	.	1.39105	2.82312	1.83896	54
Chr1	223058	223332	Ara_M5_peak_177	132	.	2.11092	14.635	13.2264	164
Chr1	224325	224500	Ara_M5_peak_178	242	.	2.48374	25.8344	24.2064	36
Chr1	224645	225285	Ara_M5_peak_179	1046	.	4.60746	107.274	104.683	183
Chr1	225438	225886	Ara_M5_peak_180	1028	.	4.54264	105.376	102.803	142
Chr1	226069	226193	Ara_M5_peak_181	83	.	1.80759	9.61256	8.3325	9
Chr1	227251	227474	Ara_M5_peak_182	464	.	3.17835	48.3947	46.4378	28
Chr1	227609	227851	Ara_M5_peak_183	347	.	2.78908	36.5306	34.7361	138
Chr1	228182	228592	Ara_M5_peak_184	443	.	3.04712	46.3042	44.3758	245
Chr1	228717	229034	Ara_M5_peak_185	1111	.	4.54672	113.783	111.135	265
Chr1	230652	230781	Ara_M5_peak_186	28	.	1.47132	3.85721	2.80489	36
Chr1	232370	233159	Ara_M5_peak_187	718	.	4.18173	74.1502	71.8869	292
Chr1	237758	238252	Ara_M5_peak_188	1189	.	5.57615	121.713	118.996	214
Chr1	239341	240013	Ara_M5_peak_189	2281	.	7.98696	231.477	228.141	176
Chr1	240219	240339	Ara_M5_peak_190	27	.	1.50906	3.79179	2.74092	91
Chr1	245344	245461	Ara_M5_peak_191	60	.	1.7851	7.28928	6.0837	94
Chr1	245767	246371	Ara_M5_peak_192	716	.	4.32474	73.9253	71.6632	356
Chr1	248018	248125	Ara_M5_peak_193	39	.	1.61948	5.06578	3.94987	35
Chr1	248317	249227	Ara_M5_peak_194	1123	.	5.41052	114.973	112.314	681
Chr1	252232	252333	Ara_M5_peak_195	29	.	1.52746	3.99205	2.93	9
Chr1	253765	253877	Ara_M5_peak_196	55	.	1.7483	6.76402	5.57757	103
Chr1	254391	254809	Ara_M5_peak_197	1614	.	6.56992	164.476	161.448	279
Chr1	255229	255378	Ara_M5_peak_198	874	.	4.76641	89.9296	87.4998	97
Chr1	258688	258817	Ara_M5_peak_199	993	.	5.07926	101.854	99.3099	53
Chr1	259349	259470	Ara_M5_peak_200	43	.	1.65628	5.52827	4.39152	26
Chr1	262374	262901	Ara_M5_peak_201	647	.	4.1223	66.938	64.7541	222
Chr1	265902	266451	Ara_M5_peak_202	422	.	3.37945	44.1469	42.2437	271
Chr1	266973	267274	Ara_M5_peak_203	90	.	1.96799	10.3181	9.01907	24
Chr1	267583	268126	Ara_M5_peak_204	148	.	2.30039	16.322	14.8742	358
Chr1	268249	268440	Ara_M5_peak_205	305	.	2.98131	32.3022	30.5692	93
Chr1	269401	269990	Ara_M5_peak_206	296	.	2.9445	31.3374	29.6192	40
Chr1	270751	270962	Ara_M5_peak_207	299	.	2.92976	31.6457	29.9252	108
Chr1	271923	272080	Ara_M5_peak_208	91	.	1.98754	10.4778	9.17206	23
Chr1	274540	275412	Ara_M5_peak_209	527	.	3.75424	54.8401	52.7992	216
Chr1	278476	278624	Ara_M5_peak_210	179	.	2.44762	19.4214	17.91	42
Chr1	284230	284501	Ara_M5_peak_211	1327	.	5.9074	135.538	132.708	133
Chr1	291036	291868	Ara_M5_peak_212	464	.	3.48994	48.3932	46.4363	122
Chr1	292755	293397	Ara_M5_peak_213	814	.	4.34859	83.8147	81.4468	548
Chr1	294192	294251	Ara_M5_peak_214	127	.	2.06315	14.1829	12.7835	16
Chr1	294873	295243	Ara_M5_peak_215	540	.	3.49919	56.0707	54.0152	320
Chr1	295785	295965	Ara_M5_peak_216	167	.	2.24768	18.2769	16.7888	145
Chr1	296109	296199	Ara_M5_peak_217	26	.	1.44818	3.68487	2.6433	10
Chr1	298111	298729	Ara_M5_peak_218	1128	.	4.91039	115.484	112.823	412
Chr1	300722	301121	Ara_M5_peak_219	369	.	3.04805	38.791	36.9656	263
Chr1	302369	303627	Ara_M5_peak_220	901	.	4.51436	92.6318	90.1784	376
Chr1	304470	304670	Ara_M5_peak_221	120	.	2.09578	13.4462	12.0638	111
Chr1	306255	306369	Ara_M5_peak_222	247	.	2.62574	26.3757	24.7394	56
Chr1	309079	309491	Ara_M5_peak_223	1273	.	5.77858	130.108	127.321	103
Chr1	309630	309780	Ara_M5_peak_224	211	.	2.59484	22.7267	21.1529	45
Chr1	309939	310354	Ara_M5_peak_225	895	.	4.82162	91.9996	89.5494	299
Chr1	312965	313356	Ara_M5_peak_226	187	.	2.48442	20.2289	18.7018	224
Chr1	315888	316186	Ara_M5_peak_227	742	.	4.39835	76.5219	74.2316	239
Chr1	319551	319621	Ara_M5_peak_228	48	.	1.69309	6.0091	4.85215	31
Chr1	319781	319990	Ara_M5_peak_229	339	.	3.11013	35.762	33.9768	133
Chr1	322810	323038	Ara_M5_peak_230	1524	.	6.36748	155.459	152.488	172
Chr1	324385	324571	Ara_M5_peak_231	17	.	1.39864	2.69537	1.71459	2
Chr1	324793	325406	Ara_M5_peak_232	516	.	3.71743	53.6756	51.6491	146
Chr1	330427	330881	Ara_M5_peak_233	130	.	2.20838	14.4948	13.0877	25
Chr1	337761	338307	Ara_M5_peak_234	3550	.	10.3978	358.649	355.081	85
Chr1	339956	340175	Ara_M5_peak_235	28	.	1.50757	3.91528	2.86168	195
Chr1	341918	342556	Ara_M5_peak_236	1334	.	5.61619	136.263	133.43	455
Chr1	342830	343222	Ara_M5_peak_237	52	.	1.7027	6.43274	5.2629	137
Chr1	344332	345837	Ara_M5_peak_238	978	.	5.04246	100.427	97.8959	120
Chr1	347387	347574	Ara_M5_peak_239	130	.	2.20838	14.4948	13.0877	27
Chr1	347713	347884	Ara_M5_peak_240	46	.	1.67468	5.76641	4.61949	101
Chr1	352374	352829	Ara_M5_peak_241	117	.	2.13476	13.0966	11.7226	101
Chr1	354833	354965	Ara_M5_peak_242	137	.	2.24518	15.2152	13.7917	95
Chr1	356279	356462	Ara_M5_peak_243	74	.	1.87712	8.67705	7.42486	146
Chr1	356777	357554	Ara_M5_peak_244	888	.	4.80322	91.3079	88.8646	201
Chr1	357788	357989	Ara_M5_peak_245	305	.	2.98131	32.3022	30.5692	182
Chr1	358955	359145	Ara_M5_peak_246	438	.	3.45979	45.7679	43.843	92
Chr1	363126	364891	Ara_M5_peak_247	1334	.	5.92581	136.319	133.484	62
Chr1	367638	368071	Ara_M5_peak_248	162	.	2.21036	17.7653	16.2904	214
Chr1	368246	368921	Ara_M5_peak_249	384	.	2.96047	40.2827	38.4356	424
Chr1	369209	369518	Ara_M5_peak_250	581	.	3.6193	60.2589	58.1533	179
Chr1	369718	370101	Ara_M5_peak_251	403	.	3.16699	42.2205	40.3452	125
Chr1	370232	370337	Ara_M5_peak_252	29	.	1.49598	4.03866	2.97563	8
Chr1	371502	372023	Ara_M5_peak_253	61	.	1.72144	7.36503	6.15827	384
Chr1	372221	372342	Ara_M5_peak_254	22	.	1.42026	3.27943	2.26147	19
Chr1	372652	372778	Ara_M5_peak_255	305	.	2.8152	32.3056	30.5726	37
Chr1	372974	373529	Ara_M5_peak_256	1854	.	6.80486	188.655	185.49	414
Chr1	386886	387384	Ara_M5_peak_257	263	.	2.81568	28.0458	26.3804	94
Chr1	389614	389838	Ara_M5_peak_258	755	.	4.43515	77.831	75.5264	118
Chr1	392053	392310	Ara_M5_peak_259	113	.	2.11636	12.7561	11.3905	87
Chr1	392645	392808	Ara_M5_peak_260	263	.	2.81568	28.0458	26.3804	62
Chr1	394567	394625	Ara_M5_peak_261	60	.	1.7851	7.28928	6.0837	28
Chr1	395480	395666	Ara_M5_peak_262	761	.	4.45356	78.4883	76.1767	81
Chr1	399777	400223	Ara_M5_peak_263	167	.	2.39241	18.2344	16.7466	45
Chr1	400510	400680	Ara_M5_peak_264	43	.	1.65628	5.52827	4.39152	120
Chr1	400867	400985	Ara_M5_peak_265	55	.	1.7483	6.76402	5.57757	36
Chr1	401143	401382	Ara_M5_peak_266	71	.	1.85872	8.39112	7.14807	195
Chr1	401850	402220	Ara_M5_peak_267	339	.	3.11013	35.762	33.9768	76
Chr1	402505	402651	Ara_M5_peak_268	79	.	1.91393	9.26123	7.99082	30
Chr1	403166	403237	Ara_M5_peak_269	46	.	1.67468	5.76641	4.61949	54
Chr1	404426	404582	Ara_M5_peak_270	215	.	2.61324	23.1537	21.5722	45
Chr1	407447	407545	Ara_M5_peak_271	29	.	1.52746	3.99205	2.93	3
Chr1	408429	408749	Ara_M5_peak_272	482	.	3.60701	50.2336	48.2503	282
Chr1	410449	410779	Ara_M5_peak_273	2132	.	7.57554	216.57	213.287	250
Chr1	411432	411828	Ara_M5_peak_274	589	.	3.93789	61.0534	58.9395	314
Chr1	414611	415129	Ara_M5_peak_275	1799	.	6.72027	183.104	179.968	410
Chr1	417556	417625	Ara_M5_peak_276	78	.	1.90524	9.15756	7.89355	46
Chr1	417833	418301	Ara_M5_peak_277	300	.	2.9629	31.8185	30.0928	95
Chr1	418432	418808	Ara_M5_peak_278	427	.	3.42298	44.6741	42.7637	257
Chr1	420065	420388	Ara_M5_peak_279	774	.	4.49036	79.8082	77.4825	116
Chr1	422284	422451	Ara_M5_peak_280	110	.	2.09796	12.4194	11.0622	29
Chr1	424458	424582	Ara_M5_peak_281	300	.	2.9629	31.8185	30.0928	72
Chr1	424714	424897	Ara_M5_peak_282	768	.	4.47196	79.1474	76.8287	131
Chr1	426472	427107	Ara_M5_peak_283	359	.	3.18374	37.7953	35.9807	109
Chr1	427240	427299	Ara_M5_peak_284	195	.	2.52123	21.0491	19.5063	18
Chr1	428398	428517	Ara_M5_peak_285	163	.	2.374	17.8452	16.3654	26
Chr1	430708	431401	Ara_M5_peak_286	1130	.	5.42892	115.716	113.05	545
Chr1	434073	434393	Ara_M5_peak_287	454	.	3.515	47.4256	45.4787	170
Chr1	434596	435144	Ara_M5_peak_288	195	.	2.52123	21.0491	19.5063	40
Chr1	436878	437190	Ara_M5_peak_289	406	.	3.34937	42.5146	40.6336	215
Chr1	437745	437908	Ara_M5_peak_290	31	.	1.54586	4.19719	3.12408	151
Chr1	439621	440290	Ara_M5_peak_291	416	.	3.38618	43.5897	41.6939	489
Chr1	440530	440724	Ara_M5_peak_292	88	.	1.96913	10.1677	8.87068	70
Chr1	442920	443085	Ara_M5_peak_293	113	.	2.11636	12.7561	11.3905	139
Chr1	443210	443330	Ara_M5_peak_294	85	.	1.95073	9.86158	8.57336	25
Chr1	446231	446658	Ara_M5_peak_295	522	.	3.73584	54.2568	52.2231	372
Chr1	446965	447203	Ara_M5_peak_296	74	.	1.87712	8.67705	7.42486	218
Chr1	447925	448403	Ara_M5_peak_297	263	.	2.81568	28.0458	26.3804	80
Chr1	450391	450582	Ara_M5_peak_298	187	.	2.45287	20.301	18.7732	155
Chr1	452119	452219	Ara_M5_peak_299	34	.	1.5641	4.5248	3.43843	6
Chr1	452696	453265	Ara_M5_peak_300	1719	.	6.70828	175.062	171.972	201
Chr1	453899	453959	Ara_M5_peak_301	89	.	1.95978	10.2155	8.91787	50
Chr1	455347	455745	Ara_M5_peak_302	394	.	3.19303	41.2627	39.4015	351
Chr1	458015	458167	Ara_M5_peak_303	94	.	1.94754	10.7819	9.47228	108
Chr1	458914	459274	Ara_M5_peak_304	229	.	2.54742	24.5958	22.99	243
Chr1	460240	460347	Ara_M5_peak_305	89	.	1.90443	10.2768	8.97834	90
Chr1	460672	460792	Ara_M5_peak_306	98	.	1.96857	11.1472	9.82369	94
Chr1	461179	461909	Ara_M5_peak_307	1043	.	4.91655	106.97	104.38	539
Chr1	463582	463858	Ara_M5_peak_308	1040	.	4.79169	106.613	104.029	182
Chr1	465502	465629	Ara_M5_peak_309	98	.	1.89553	11.1937	9.8696	18
Chr1	467772	468006	Ara_M5_peak_310	791	.	3.95993	81.4453	79.1039	126
Chr1	468499	469018	Ara_M5_peak_311	249	.	2.50333	26.6215	24.9831	462
Chr1	469324	469823	Ara_M5_peak_312	751	.	3.8376	77.4143	75.1156	354
Chr1	471089	471148	Ara_M5_peak_313	108	.	1.93575	12.1922	10.8423	29
Chr1	471443	471725	Ara_M5_peak_314	399	.	2.97231	41.8279	39.9592	45
Chr1	471878	472273	Ara_M5_peak_315	955	.	4.28494	98.0599	95.5537	195
Chr1	472636	472744	Ara_M5_peak_316	150	.	2.08708	16.4496	15.0005	37
Chr1	473171	473246	Ara_M5_peak_317	474	.	3.19742	49.427	47.4562	37
Chr1	473586	473786	Ara_M5_peak_318	60	.	1.68481	7.27076	6.07082	160
Chr1	474325	474484	Ara_M5_peak_319	838	.	4.12622	86.2582	83.8674	55
Chr1	476431	476704	Ara_M5_peak_320	403	.	3.15506	42.1982	40.3231	219
Chr1	476943	477147	Ara_M5_peak_321	142	.	2.19945	15.6587	14.2262	112
Chr1	478279	478426	Ara_M5_peak_322	50	.	1.70337	6.17044	5.01072	40
Chr1	478855	479401	Ara_M5_peak_323	541	.	3.71596	56.1856	54.1293	94
Chr1	479759	479846	Ara_M5_peak_324	32	.	1.53073	4.34906	3.27282	3
Chr1	480722	480884	Ara_M5_peak_325	455	.	3.28514	47.4471	45.5	43
Chr1	482153	482211	Ara_M5_peak_326	140	.	2.17313	15.4767	14.0504	35
Chr1	483275	483519	Ara_M5_peak_327	171	.	2.28956	18.62	17.1285	59
Chr1	483850	484106	Ara_M5_peak_328	2397	.	7.4475	243.095	239.725	124
Chr1	484324	484560	Ara_M5_peak_329	375	.	3.05766	39.359	37.5221	134
Chr1	484722	484829	Ara_M5_peak_330	51	.	1.665	6.31527	5.14741	24
Chr1	485119	485259	Ara_M5_peak_331	140	.	2.16814	15.505	14.0785	94
Chr1	485590	485839	Ara_M5_peak_332	645	.	3.85784	66.7578	64.5784	115
Chr1	487614	487712	Ara_M5_peak_333	115	.	2.03656	12.8744	11.5074	51
Chr1	487851	488107	Ara_M5_peak_334	117	.	2.0433	13.1526	11.778	35
Chr1	488514	488763	Ara_M5_peak_335	134	.	2.09775	14.818	13.4074	149
Chr1	488984	489092	Ara_M5_peak_336	161	.	2.28529	17.6221	16.1486	73
Chr1	490497	490873	Ara_M5_peak_337	603	.	3.95568	62.4708	60.3416	240
Chr1	492338	492431	Ara_M5_peak_338	175	.	2.42921	19.0225	17.5189	46
Chr1	492957	493126	Ara_M5_peak_339	310	.	2.99971	32.7886	31.0481	113
Chr1	493277	493550	Ara_M5_peak_340	653	.	4.1407	67.5637	65.3726	130
Chr1	494480	494594	Ara_M5_peak_341	104	.	2.06115	11.757	10.4168	15
Chr1	497605	497780	Ara_M5_peak_342	123	.	2.17157	13.7885	12.3979	140
Chr1	498490	498642	Ara_M5_peak_343	438	.	3.45979	45.7679	43.843	101
Chr1	498807	499228	Ara_M5_peak_344	868	.	4.74801	89.2429	86.82	290
Chr1	501439	501771	Ara_M5_peak_345	659	.	4.15911	68.1914	65.9931	133
Chr1	502021	502277	Ara_M5_peak_346	113	.	2.11636	12.7561	11.3905	226
Chr1	502594	502814	Ara_M5_peak_347	33	.	1.56427	4.40718	3.32319	167
Chr1	503389	503501	Ara_M5_peak_348	53	.	1.72989	6.50795	5.33121	20
Chr1	504123	504429	Ara_M5_peak_349	814	.	4.60078	83.8102	81.4424	87
Chr1	504565	504674	Ara_M5_peak_350	63	.	1.80351	7.55838	6.3433	54
Chr1	505503	505853	Ara_M5_peak_351	291	.	2.9261	30.8589	29.1483	223
Chr1	506482	506540	Ara_M5_peak_352	198	.	2.48117	21.4126	19.8665	25
Chr1	507191	507309	Ara_M5_peak_353	272	.	2.85248	28.9725	27.2921	39
Chr1	507888	508183	Ara_M5_peak_354	241	.	2.72366	25.7786	24.1511	111
Chr1	509813	510015	Ara_M5_peak_355	82	.	1.93233	9.5594	8.28007	32
Chr1	510989	511407	Ara_M5_peak_356	635	.	4.08549	65.6923	63.5228	370
Chr1	512061	512264	Ara_M5_peak_357	86	.	1.90468	9.90404	8.61525	176
Chr1	513701	513765	Ara_M5_peak_358	34	.	1.52791	4.57271	3.48536	57
Chr1	514194	514265	Ara_M5_peak_359	16	.	1.36107	2.65507	1.68315	1
Chr1	515316	515431	Ara_M5_peak_360	124	.	2.09955	13.8846	12.4929	57
Chr1	515612	515815	Ara_M5_peak_361	655	.	3.89177	67.7252	65.5331	57
Chr1	516397	516535	Ara_M5_peak_362	382	.	3.17239	40.067	38.2214	86
Chr1	516804	517107	Ara_M5_peak_363	942	.	4.65877	96.7091	94.2161	129
Chr1	517244	517665	Ara_M5_peak_364	108	.	1.99081	12.2093	10.8592	345
Chr1	517907	518283	Ara_M5_peak_365	1228	.	5.15997	125.564	122.815	260
Chr1	520336	520533	Ara_M5_peak_366	102	.	1.98169	11.5758	10.2425	116
Chr1	521715	522198	Ara_M5_peak_367	1043	.	5.20809	106.897	104.308	322
Chr1	522586	522738	Ara_M5_peak_368	310	.	2.99971	32.7886	31.0481	35
Chr1	528768	528986	Ara_M5_peak_369	211	.	2.59484	22.7267	21.1529	142
Chr1	529607	529678	Ara_M5_peak_370	113	.	2.11636	12.7561	11.3905	32
Chr1	537172	537294	Ara_M5_peak_371	120	.	2.15317	13.4407	12.0584	22
Chr1	537421	537879	Ara_M5_peak_372	1688	.	6.73554	171.963	168.89	157
Chr1	539923	540000	Ara_M5_peak_373	17	.	1.39864	2.69537	1.71459	22
Chr1	540320	540458	Ara_M5_peak_374	207	.	2.57644	22.3027	20.7366	46
Chr1	541204	541279	Ara_M5_peak_375	427	.	3.42298	44.6741	42.7637	31
Chr1	542906	543026	Ara_M5_peak_376	41	.	1.63788	5.29471	4.16835	103
Chr1	544339	544585	Ara_M5_peak_377	354	.	3.16534	37.2832	35.4759	206
Chr1	545512	545570	Ara_M5_peak_378	53	.	1.72989	6.50795	5.33121	49
Chr1	551014	551072	Ara_M5_peak_379	23	.	1.47225	3.40612	2.37797	30
Chr1	551633	552034	Ara_M5_peak_380	100	.	2.04275	11.4314	10.0998	94
Chr1	552266	552388	Ara_M5_peak_381	135	.	2.22215	15.0093	13.5924	77
Chr1	552511	552606	Ara_M5_peak_382	272	.	2.83077	28.9723	27.2921	29
Chr1	552743	553005	Ara_M5_peak_383	571	.	3.83641	59.1941	57.1019	40
Chr1	553132	553519	Ara_M5_peak_384	72	.	1.85192	8.52144	7.27654	298
Chr1	553684	553838	Ara_M5_peak_385	74	.	1.85289	8.67263	7.42486	111
Chr1	553980	554089	Ara_M5_peak_386	33	.	1.52774	4.39126	3.31413	4
Chr1	555008	555301	Ara_M5_peak_387	449	.	3.20516	46.8919	44.9522	154
Chr1	556006	556434	Ara_M5_peak_388	155	.	2.14033	16.9919	15.533	398
Chr1	556571	556799	Ara_M5_peak_389	569	.	3.43293	59.0315	56.9402	33
Chr1	556987	557275	Ara_M5_peak_390	725	.	3.85198	74.8492	72.5786	227
Chr1	558738	558911	Ara_M5_peak_391	2725	.	7.7872	275.976	272.529	104
Chr1	559613	559932	Ara_M5_peak_392	255	.	2.54003	27.1817	25.5311	136
Chr1	560086	560237	Ara_M5_peak_393	340	.	2.812	35.8223	34.0366	75
Chr1	560691	560940	Ara_M5_peak_394	237	.	2.45778	25.342	23.7222	30
Chr1	562998	563119	Ara_M5_peak_395	135	.	2.08317	14.9667	13.5501	26
Chr1	563405	563676	Ara_M5_peak_396	102	.	1.8952	11.5585	10.2254	190
Chr1	563869	564221	Ara_M5_peak_397	284	.	2.65734	30.1657	28.4682	24
Chr1	564669	565063	Ara_M5_peak_398	490	.	3.31326	51.0542	49.0622	111
Chr1	565300	565515	Ara_M5_peak_399	235	.	2.52909	25.1334	23.5191	49
Chr1	565803	566276	Ara_M5_peak_400	366	.	2.99249	38.499	36.6756	136
Chr1	566772	566880	Ara_M5_peak_401	273	.	2.61929	28.9811	27.3006	54
Chr1	567460	567577	Ara_M5_peak_402	59	.	1.66425	7.14946	5.95146	28
Chr1	567828	568028	Ara_M5_peak_403	35	.	1.50929	4.68145	3.5855	103
Chr1	568389	568617	Ara_M5_peak_404	705	.	3.8202	72.7965	70.5478	95
Chr1	569155	569301	Ara_M5_peak_405	531	.	3.47037	55.2381	53.1948	30
Chr1	569849	569939	Ara_M5_peak_406	131	.	2.1257	14.5631	13.1552	35
Chr1	570349	570432	Ara_M5_peak_407	126	.	2.11331	14.0854	12.6915	43
Chr1	570566	570647	Ara_M5_peak_408	114	.	2.05919	12.8355	11.469	25
Chr1	570995	571572	Ara_M5_peak_409	307	.	2.8765	32.5341	30.7993	402
Chr1	571902	572210	Ara_M5_peak_410	1109	.	5.17784	113.593	110.946	239
Chr1	574917	574982	Ara_M5_peak_411	167	.	2.39241	18.2344	16.7466	32
Chr1	575120	575258	Ara_M5_peak_412	315	.	3.01811	33.2777	31.5296	33
Chr1	575517	576052	Ara_M5_peak_413	349	.	3.14693	36.7736	34.9737	124
Chr1	576192	576310	Ara_M5_peak_414	259	.	2.79728	27.5867	25.9289	90
Chr1	580252	580676	Ara_M5_peak_415	1473	.	5.96074	150.28	147.346	307
Chr1	582023	582195	Ara_M5_peak_416	975	.	4.96998	100.065	97.5392	75
Chr1	582722	582926	Ara_M5_peak_417	30	.	1.53314	4.1535	3.088	174
Chr1	583283	583380	Ara_M5_peak_418	62	.	1.77829	7.4611	6.25283	75
Chr1	583872	584253	Ara_M5_peak_419	2635	.	8.64402	267.002	263.572	171
Chr1	588175	588302	Ara_M5_peak_420	183	.	2.46602	19.8236	18.3043	91
Chr1	590856	591074	Ara_M5_peak_421	505	.	3.68063	52.5196	50.5075	115
Chr1	591200	591475	Ara_M5_peak_422	259	.	2.79728	27.5867	25.9289	171
Chr1	591615	591683	Ara_M5_peak_423	156	.	2.3372	17.0769	15.613	27
Chr1	593184	593683	Ara_M5_peak_424	191	.	2.50283	20.6374	19.1024	281
Chr1	594090	594203	Ara_M5_peak_425	58	.	1.7667	7.02448	5.82844	91
Chr1	594358	594524	Ara_M5_peak_426	729	.	4.36154	75.2199	72.9438	66
Chr1	598664	599731	Ara_M5_peak_427	1137	.	5.44733	116.461	113.788	222
Chr1	602205	602629	Ara_M5_peak_428	981	.	4.87781	100.633	98.1015	78
Chr1	604147	604266	Ara_M5_peak_429	55	.	1.70274	6.70224	5.52231	92
Chr1	604908	605067	Ara_M5_peak_430	203	.	2.45968	21.8839	20.3256	109
Chr1	605811	605932	Ara_M5_peak_431	171	.	2.32363	18.6896	17.1934	20
Chr1	606660	606866	Ara_M5_peak_432	1463	.	5.91682	149.315	146.386	99
Chr1	607244	608170	Ara_M5_peak_433	350	.	3.05583	36.802	35.0019	77
Chr1	609447	609847	Ara_M5_peak_434	764	.	4.41698	78.7296	76.4167	72
Chr1	612882	612999	Ara_M5_peak_435	171	.	2.35379	18.6686	17.1725	83
Chr1	613863	613955	Ara_M5_peak_436	74	.	1.83483	8.65698	7.41009	53
Chr1	614105	614226	Ara_M5_peak_437	93	.	1.95511	10.6418	9.33394	22
Chr1	614451	614543	Ara_M5_peak_438	64	.	1.7753	7.67244	6.45564	48
Chr1	614687	614852	Ara_M5_peak_439	348	.	3.06786	36.6233	34.8281	51
Chr1	616158	616325	Ara_M5_peak_440	417	.	3.19657	43.6071	41.7112	105
Chr1	616578	617182	Ara_M5_peak_441	2255	.	7.05596	228.907	225.581	382
Chr1	618121	618240	Ara_M5_peak_442	107	.	1.95617	12.1086	10.7596	88
Chr1	620110	620226	Ara_M5_peak_443	86	.	1.86182	9.98128	8.69148	85
Chr1	620427	620676	Ara_M5_peak_444	87	.	1.86542	10.0316	8.74114	115
Chr1	621174	621537	Ara_M5_peak_445	2590	.	7.37364	262.445	259.026	69
Chr1	622889	623268	Ara_M5_peak_446	222	.	2.51295	23.8679	22.2762	107
Chr1	623494	623743	Ara_M5_peak_447	61	.	1.74531	7.373	6.16612	147
Chr1	625648	625966	Ara_M5_peak_448	1174	.	5.16228	120.169	117.468	116
Chr1	626463	626788	Ara_M5_peak_449	2238	.	7.76204	227.187	223.866	270
Chr1	630050	630376	Ara_M5_peak_450	325	.	3.01348	34.3427	32.5791	106
Chr1	633299	633414	Ara_M5_peak_451	71	.	1.85872	8.39112	7.14807	30
Chr1	634620	634705	Ara_M5_peak_452	224	.	2.65005	24.0168	22.4199	42
Chr1	634871	635248	Ara_M5_peak_453	465	.	3.5518	48.5421	46.5806	38
Chr1	638639	638789	Ara_M5_peak_454	768	.	4.47196	79.1474	76.8287	53
Chr1	641409	641524	Ara_M5_peak_455	107	.	2.07955	12.0863	10.7376	49
Chr1	641992	642310	Ara_M5_peak_456	156	.	2.3372	17.0769	15.613	256
Chr1	642450	642636	Ara_M5_peak_457	179	.	2.44762	19.4214	17.91	103
Chr1	642939	643082	Ara_M5_peak_458	66	.	1.82191	7.83174	6.60726	131
Chr1	644490	644777	Ara_M5_peak_459	254	.	2.77887	27.1304	25.4801	112
Chr1	644947	645396	Ara_M5_peak_460	113	.	2.11636	12.7561	11.3905	117
Chr1	651874	653093	Ara_M5_peak_461	1764	.	6.90117	179.545	176.429	771
Chr1	653274	653732	Ara_M5_peak_462	268	.	2.83408	28.5078	26.8348	127
Chr1	654314	654558	Ara_M5_peak_463	339	.	3.11013	35.762	33.9768	29
Chr1	655389	655689	Ara_M5_peak_464	141	.	2.24698	15.5764	14.149	104
Chr1	658168	658321	Ara_M5_peak_465	305	.	2.98131	32.3022	30.5692	98
Chr1	659889	660204	Ara_M5_peak_466	207	.	2.57644	22.3027	20.7366	115
Chr1	662245	662741	Ara_M5_peak_467	228	.	2.66845	24.4528	22.8483	204
Chr1	664243	664320	Ara_M5_peak_468	123	.	2.17157	13.7885	12.3979	29
Chr1	665185	665293	Ara_M5_peak_469	422	.	3.40458	44.1307	42.2277	44
Chr1	666362	666553	Ara_M5_peak_470	55	.	1.7483	6.76402	5.57757	75
Chr1	669210	669271	Ara_M5_peak_471	63	.	1.80351	7.55838	6.3433	27
Chr1	669828	670130	Ara_M5_peak_472	1123	.	5.41052	114.973	112.314	97
Chr1	671217	671405	Ara_M5_peak_473	539	.	3.79104	56.0131	53.958	114
Chr1	672716	672896	Ara_M5_peak_474	1288	.	5.81539	131.653	128.853	56
Chr1	673066	673372	Ara_M5_peak_475	781	.	4.50877	80.4708	78.138	126
Chr1	677088	677338	Ara_M5_peak_476	1573	.	6.4779	160.359	157.357	210
Chr1	681396	681454	Ara_M5_peak_477	85	.	1.95073	9.86158	8.57336	32
Chr1	687442	687624	Ara_M5_peak_478	74	.	1.87712	8.67705	7.42486	33
Chr1	687801	687907	Ara_M5_peak_479	79	.	1.91393	9.26123	7.99082	77
Chr1	692582	693011	Ara_M5_peak_480	433	.	3.44139	45.2198	43.3022	391
Chr1	693204	693263	Ara_M5_peak_481	94	.	2.00594	10.7919	9.47742	25
Chr1	693764	693913	Ara_M5_peak_482	282	.	2.88929	29.9102	28.2147	103
Chr1	696301	696448	Ara_M5_peak_483	195	.	2.52123	21.0491	19.5063	112
Chr1	697850	697974	Ara_M5_peak_484	17	.	1.39864	2.69537	1.71459	23
Chr1	698565	698716	Ara_M5_peak_485	344	.	3.12853	36.2665	34.4739	36
Chr1	698908	699034	Ara_M5_peak_486	141	.	2.26358	15.5807	14.149	48
Chr1	699170	699303	Ara_M5_peak_487	41	.	1.63788	5.29471	4.16835	101
Chr1	699711	699827	Ara_M5_peak_488	110	.	2.09796	12.4194	11.0622	87
Chr1	700485	700820	Ara_M5_peak_489	117	.	2.13476	13.0966	11.7226	68
Chr1	700946	701417	Ara_M5_peak_490	2863	.	9.12795	289.799	286.325	333
Chr1	703812	704022	Ara_M5_peak_491	68	.	1.82039	8.07979	6.85158	165
Chr1	705706	705804	Ara_M5_peak_492	37	.	1.60107	4.84152	3.73613	91
Chr1	706561	707520	Ara_M5_peak_493	1057	.	5.24489	108.352	105.75	137
Chr1	710434	710575	Ara_M5_peak_494	60	.	1.7851	7.28928	6.0837	114
Chr1	711809	712072	Ara_M5_peak_495	964	.	5.00565	99.0062	96.4888	96
Chr1	712347	712485	Ara_M5_peak_496	171	.	2.41081	18.6268	17.1312	32
Chr1	727527	727861	Ara_M5_peak_497	183	.	2.46602	19.8236	18.3043	134
Chr1	728180	728995	Ara_M5_peak_498	1050	.	5.22649	107.624	105.028	643
Chr1	729398	729519	Ara_M5_peak_499	85	.	1.95073	9.86158	8.57336	102
Chr1	729698	729902	Ara_M5_peak_500	993	.	5.07926	101.854	99.3099	90
Chr1	737453	737629	Ara_M5_peak_501	277	.	2.87089	29.44	27.752	109
Chr1	738044	738189	Ara_M5_peak_502	282	.	2.88929	29.9102	28.2147	48
Chr1	738404	739674	Ara_M5_peak_503	1680	.	6.71714	171.126	168.058	1044
Chr1	740455	740530	Ara_M5_peak_504	68	.	1.84031	8.10934	6.8755	23
Chr1	743941	744016	Ara_M5_peak_505	137	.	2.24518	15.2152	13.7917	26
Chr1	746612	747259	Ara_M5_peak_506	354	.	3.16534	37.2832	35.4759	593
Chr1	747889	748250	Ara_M5_peak_507	533	.	3.77264	55.4256	53.3775	298
Chr1	748413	748480	Ara_M5_peak_508	71	.	1.85872	8.39112	7.14807	38
Chr1	748960	749315	Ara_M5_peak_509	787	.	4.52717	81.1352	78.7954	53
Chr1	750012	750293	Ara_M5_peak_510	38	.	1.60874	5.00442	3.8959	129
Chr1	752136	752236	Ara_M5_peak_511	192	.	2.47279	20.7382	19.2022	26
Chr1	753167	753311	Ara_M5_peak_512	148	.	2.28198	16.2972	14.8539	26
Chr1	754197	754465	Ara_M5_peak_513	723	.	4.34314	74.5717	72.3026	160
Chr1	755112	755315	Ara_M5_peak_514	77	.	1.89552	8.9671	7.70575	110
Chr1	756268	756448	Ara_M5_peak_515	924	.	4.83232	94.9283	92.4504	82
Chr1	757701	757820	Ara_M5_peak_516	50	.	1.71149	6.2563	5.08942	22
Chr1	757954	758073	Ara_M5_peak_517	35	.	1.58267	4.62197	3.52719	14
Chr1	758477	758558	Ara_M5_peak_518	29	.	1.52746	3.99205	2.93	67
Chr1	760512	760990	Ara_M5_peak_519	3469	.	10.2505	350.47	346.912	94
Chr1	761125	761330	Ara_M5_peak_520	1722	.	6.80916	175.321	172.228	94
Chr1	766721	766925	Ara_M5_peak_521	163	.	2.374	17.8452	16.3654	52
Chr1	767492	768629	Ara_M5_peak_522	291	.	2.9261	30.8589	29.1483	522
Chr1	769471	769657	Ara_M5_peak_523	801	.	4.45337	82.55	80.1957	123
Chr1	770862	770966	Ara_M5_peak_524	21	.	1.42305	3.12312	2.11626	92
Chr1	771381	771506	Ara_M5_peak_525	137	.	2.18687	15.1553	13.7367	82
Chr1	772324	772465	Ara_M5_peak_526	72	.	1.84113	8.53001	7.28499	30
Chr1	773022	773443	Ara_M5_peak_527	1789	.	6.95638	182.094	178.963	173
Chr1	775356	775555	Ara_M5_peak_528	854	.	4.7112	87.8745	85.4654	102
Chr1	780088	780519	Ara_M5_peak_529	167	.	2.39241	18.2344	16.7466	406
Chr1	782852	782967	Ara_M5_peak_530	79	.	1.91393	9.26123	7.99082	73
Chr1	784667	784899	Ara_M5_peak_531	324	.	3.04916	34.1693	32.4107	102
Chr1	785456	786135	Ara_M5_peak_532	1996	.	7.39806	202.846	199.613	220
Chr1	786253	787110	Ara_M5_peak_533	760	.	4.44564	78.3396	76.0322	405
Chr1	788680	788834	Ara_M5_peak_534	29	.	1.50596	4.00216	2.9399	136
Chr1	789142	789319	Ara_M5_peak_535	339	.	2.99736	35.7666	33.9813	130
Chr1	789870	790095	Ara_M5_peak_536	326	.	2.98562	34.4334	32.6691	132
Chr1	792988	793506	Ara_M5_peak_537	539	.	3.79104	56.0131	53.958	286
Chr1	795382	795669	Ara_M5_peak_538	563	.	3.86466	58.3842	56.3004	38
Chr1	796289	796465	Ara_M5_peak_539	41	.	1.63788	5.29471	4.16835	37
Chr1	797762	797898	Ara_M5_peak_540	37	.	1.60107	4.84152	3.73613	117
Chr1	798454	798613	Ara_M5_peak_541	488	.	3.62542	50.8018	48.8113	96
Chr1	798832	799146	Ara_M5_peak_542	241	.	2.72366	25.7786	24.1511	149
Chr1	802434	802840	Ara_M5_peak_543	159	.	2.3556	17.4594	15.9876	24
Chr1	806517	806625	Ara_M5_peak_544	91	.	1.98754	10.4778	9.17206	44
Chr1	806812	806901	Ara_M5_peak_545	31	.	1.54586	4.19719	3.12408	9
Chr1	807153	807408	Ara_M5_peak_546	277	.	2.87089	29.44	27.752	33
Chr1	810646	810765	Ara_M5_peak_547	141	.	2.26358	15.5807	14.149	95
Chr1	813113	813495	Ara_M5_peak_548	438	.	3.45979	45.7679	43.843	185
Chr1	816621	816783	Ara_M5_peak_549	82	.	1.93233	9.5594	8.28007	137
Chr1	817657	817960	Ara_M5_peak_550	63	.	1.80351	7.55838	6.3433	187
Chr1	819372	819674	Ara_M5_peak_551	854	.	4.7112	87.8745	85.4654	188
Chr1	824362	824571	Ara_M5_peak_552	929	.	4.91364	95.4827	92.9988	117
Chr1	826434	826593	Ara_M5_peak_553	923	.	4.89523	94.7828	92.3057	51
Chr1	830231	830679	Ara_M5_peak_554	874	.	4.76641	89.9296	87.4998	293
Chr1	835131	835546	Ara_M5_peak_555	416	.	3.38618	43.5897	41.6939	328
Chr1	835757	835816	Ara_M5_peak_556	94	.	2.00594	10.7919	9.47742	25
Chr1	842508	842566	Ara_M5_peak_557	58	.	1.7667	7.02448	5.82844	36
Chr1	843544	843621	Ara_M5_peak_558	25	.	1.49065	3.59647	2.55692	60
Chr1	844181	844403	Ara_M5_peak_559	923	.	4.89523	94.7828	92.3057	81
Chr1	846516	846780	Ara_M5_peak_560	203	.	2.51612	21.9567	20.3977	177
Chr1	847686	847885	Ara_M5_peak_561	375	.	3.08862	39.35	37.5132	72
Chr1	849363	849505	Ara_M5_peak_562	66	.	1.78538	7.85544	6.63062	121
Chr1	849648	850376	Ara_M5_peak_563	626	.	3.89544	64.8463	62.6889	121
Chr1	850560	851016	Ara_M5_peak_564	749	.	4.21684	77.2004	74.9028	98
Chr1	851258	851469	Ara_M5_peak_565	142	.	2.20307	15.7123	14.2793	186
Chr1	851692	852367	Ara_M5_peak_566	369	.	3.11375	38.8157	36.9901	513
Chr1	853789	854170	Ara_M5_peak_567	737	.	4.26123	76.015	73.731	51
Chr1	854528	854611	Ara_M5_peak_568	36	.	1.57878	4.70847	3.612	51
Chr1	854768	854951	Ara_M5_peak_569	43	.	1.64571	5.51714	4.38661	52
Chr1	859712	859996	Ara_M5_peak_570	801	.	4.56398	82.4692	80.1153	115
Chr1	860612	860670	Ara_M5_peak_571	148	.	2.30039	16.322	14.8742	16
Chr1	862866	862988	Ara_M5_peak_572	121	.	2.15439	13.5593	12.1757	25
Chr1	864166	864439	Ara_M5_peak_573	475	.	3.36963	49.555	47.5834	43
Chr1	864757	865477	Ara_M5_peak_574	655	.	3.9607	67.7692	65.5769	605
Chr1	865828	866093	Ara_M5_peak_575	71	.	1.82306	8.37752	7.13974	221
Chr1	867725	867979	Ara_M5_peak_576	964	.	4.58481	98.9862	96.4719	159
Chr1	868110	868433	Ara_M5_peak_577	1816	.	6.36434	184.755	181.61	38
Chr1	868696	869001	Ara_M5_peak_578	133	.	2.11143	14.7402	13.3304	106
Chr1	871221	871788	Ara_M5_peak_579	1147	.	5.43713	117.404	114.725	237
Chr1	875779	876229	Ara_M5_peak_580	672	.	4.19591	69.4524	67.2398	248
Chr1	877706	877954	Ara_M5_peak_581	1257	.	5.74178	128.569	125.795	93
Chr1	880150	880597	Ara_M5_peak_582	807	.	4.58238	83.1389	80.778	158
Chr1	883661	883727	Ara_M5_peak_583	277	.	2.87089	29.44	27.752	24
Chr1	888004	888540	Ara_M5_peak_584	272	.	2.85248	28.9725	27.2921	31
Chr1	889982	890250	Ara_M5_peak_585	427	.	3.42298	44.6741	42.7637	134
Chr1	892396	892513	Ara_M5_peak_586	241	.	2.72366	25.7786	24.1511	29
Chr1	892634	892877	Ara_M5_peak_587	134	.	2.22678	14.8532	13.4379	75
Chr1	894069	894160	Ara_M5_peak_588	48	.	1.69309	6.0091	4.85215	26
Chr1	896543	896675	Ara_M5_peak_589	289	.	2.81026	30.6842	28.9788	102
Chr1	896969	897089	Ara_M5_peak_590	84	.	1.89239	9.74406	8.46224	10
Chr1	897411	897640	Ara_M5_peak_591	120	.	2.08597	13.402	12.0246	35
Chr1	897772	898862	Ara_M5_peak_592	1214	.	5.25808	124.14	121.403	881
Chr1	899566	900340	Ara_M5_peak_593	1793	.	6.25453	182.51	179.378	510
Chr1	900599	900700	Ara_M5_peak_594	70	.	1.76264	8.24128	7.00551	20
Chr1	902847	902975	Ara_M5_peak_595	143	.	2.14881	15.8202	14.3861	44
Chr1	903223	903554	Ara_M5_peak_596	323	.	2.90619	34.132	32.3737	238
Chr1	903703	904228	Ara_M5_peak_597	400	.	3.26454	41.9125	40.0432	312
Chr1	907387	907608	Ara_M5_peak_598	654	.	4.12971	67.6492	65.4575	86
Chr1	908980	909098	Ara_M5_peak_599	41	.	1.63788	5.29471	4.16835	23
Chr1	909565	909784	Ara_M5_peak_600	465	.	3.5518	48.5421	46.5806	153
Chr1	909925	910274	Ara_M5_peak_601	563	.	3.86466	58.3842	56.3004	251
Chr1	911203	911405	Ara_M5_peak_602	71	.	1.85872	8.39112	7.14807	86
Chr1	912211	912332	Ara_M5_peak_603	107	.	2.07955	12.0863	10.7376	95
Chr1	915276	915337	Ara_M5_peak_604	41	.	1.63788	5.29471	4.16835	12
Chr1	916479	916955	Ara_M5_peak_605	88	.	1.96913	10.1677	8.87068	162
Chr1	917366	917491	Ara_M5_peak_606	29	.	1.52746	3.99205	2.93	5
Chr1	917888	918332	Ara_M5_peak_607	943	.	4.95044	96.8873	94.3902	216
Chr1	918769	918898	Ara_M5_peak_608	171	.	2.41081	18.6268	17.1312	93
Chr1	919118	919205	Ara_M5_peak_609	74	.	1.87712	8.67705	7.42486	23
Chr1	920520	920685	Ara_M5_peak_610	33	.	1.56427	4.40718	3.32319	90
Chr1	921496	921762	Ara_M5_peak_611	85	.	1.95073	9.86158	8.57336	29
Chr1	922227	922604	Ara_M5_peak_612	923	.	4.89523	94.7828	92.3057	123
Chr1	923220	923422	Ara_M5_peak_613	88	.	1.96913	10.1677	8.87068	164
Chr1	927146	927318	Ara_M5_peak_614	187	.	2.48442	20.2289	18.7018	140
Chr1	927789	927909	Ara_M5_peak_615	35	.	1.58267	4.62197	3.52719	30
Chr1	929718	930045	Ara_M5_peak_616	836	.	4.63018	85.9952	83.6056	271
Chr1	930195	930403	Ara_M5_peak_617	70	.	1.84663	8.32016	7.08325	161
Chr1	930575	930989	Ara_M5_peak_618	468	.	3.54185	48.8455	46.882	342
Chr1	931633	931915	Ara_M5_peak_619	828	.	4.51099	85.2682	82.8858	218
Chr1	932065	932413	Ara_M5_peak_620	453	.	3.37921	47.2796	45.3374	144
Chr1	932918	933046	Ara_M5_peak_621	78	.	1.82698	9.09422	7.83112	11
Chr1	933496	933680	Ara_M5_peak_622	99	.	1.94509	11.2262	9.90175	129
Chr1	936470	937086	Ara_M5_peak_623	364	.	3.20214	38.3099	36.4879	444
Chr1	937548	937906	Ara_M5_peak_624	1311	.	5.8706	133.98	131.162	169
Chr1	943363	943516	Ara_M5_peak_625	950	.	4.96884	97.592	95.0882	101
Chr1	943636	943912	Ara_M5_peak_626	232	.	2.68686	24.8918	23.2796	70
Chr1	944476	944620	Ara_M5_peak_627	148	.	2.30039	16.322	14.8742	113
Chr1	951792	952272	Ara_M5_peak_628	1849	.	7.0852	188.08	184.917	378
Chr1	952402	952755	Ara_M5_peak_629	130	.	2.20838	14.4948	13.0877	138
Chr1	956049	956216	Ara_M5_peak_630	44	.	1.6543	5.60588	4.46774	148
Chr1	956578	957189	Ara_M5_peak_631	274	.	2.81107	29.1657	27.4837	514
Chr1	958006	958484	Ara_M5_peak_632	416	.	3.38618	43.5897	41.6939	182
Chr1	960813	961012	Ara_M5_peak_633	263	.	2.81568	28.0458	26.3804	116
Chr1	961161	962179	Ara_M5_peak_634	691	.	4.25112	71.3582	69.1243	669
Chr1	966737	967326	Ara_M5_peak_635	755	.	4.43515	77.831	75.5264	107
Chr1	967571	967784	Ara_M5_peak_636	794	.	4.54557	81.8014	79.4545	95
Chr1	968593	968785	Ara_M5_peak_637	82	.	1.93233	9.5594	8.28007	166
Chr1	970182	970343	Ara_M5_peak_638	79	.	1.91393	9.26123	7.99082	39
Chr1	970664	970823	Ara_M5_peak_639	175	.	2.42921	19.0225	17.5189	43
Chr1	972824	973361	Ara_M5_peak_640	539	.	3.79104	56.0131	53.958	274
Chr1	974975	975329	Ara_M5_peak_641	79	.	1.8635	9.2265	7.96152	112
Chr1	975458	975867	Ara_M5_peak_642	428	.	3.32772	44.7778	42.8667	333
Chr1	976521	976636	Ara_M5_peak_643	350	.	3.05583	36.802	35.0019	64
Chr1	977734	977865	Ara_M5_peak_644	31	.	1.49749	4.25141	3.17718	106
Chr1	978138	978446	Ara_M5_peak_645	344	.	2.93141	36.2248	34.4362	35
Chr1	978579	978900	Ara_M5_peak_646	134	.	2.10719	14.869	13.4535	35
Chr1	979045	979537	Ara_M5_peak_647	348	.	2.84197	36.6032	34.8081	128
Chr1	981855	982208	Ara_M5_peak_648	817	.	4.07029	84.0797	81.7104	234
Chr1	982438	982600	Ara_M5_peak_649	76	.	1.77814	8.87691	7.62188	32
Chr1	983385	984634	Ara_M5_peak_650	1010	.	4.6572	103.558	101	278
Chr1	985048	985159	Ara_M5_peak_651	54	.	1.69925	6.60825	5.42988	15
Chr1	987999	988229	Ara_M5_peak_652	156	.	2.3372	17.0769	15.613	102
Chr1	990918	991197	Ara_M5_peak_653	117	.	2.13476	13.0966	11.7226	135
Chr1	992910	993441	Ara_M5_peak_654	950	.	4.96884	97.592	95.0882	438
Chr1	994963	995054	Ara_M5_peak_655	39	.	1.61948	5.06578	3.94987	24
Chr1	995588	996116	Ara_M5_peak_656	1197	.	5.59455	122.469	119.746	364
Chr1	999974	1000087	Ara_M5_peak_657	35	.	1.58267	4.62197	3.52719	18
Chr1	1000499	1000817	Ara_M5_peak_658	325	.	3.05492	34.2636	32.5006	184
Chr1	1000977	1001198	Ara_M5_peak_659	339	.	3.11013	35.762	33.9768	195
Chr1	1003870	1003928	Ara_M5_peak_660	33	.	1.56427	4.40718	3.32319	34
Chr1	1004477	1004764	Ara_M5_peak_661	199	.	2.53963	21.4638	19.9133	186
Chr1	1004956	1005072	Ara_M5_peak_662	110	.	2.09796	12.4194	11.0622	75
Chr1	1008092	1008633	Ara_M5_peak_663	574	.	3.90146	59.5821	57.484	93
Chr1	1011040	1011389	Ara_M5_peak_664	2048	.	7.50848	208.133	204.879	271
Chr1	1016477	1016674	Ara_M5_peak_665	58	.	1.7667	7.02448	5.82844	68
Chr1	1017682	1018132	Ara_M5_peak_666	2200	.	7.82133	223.317	220.01	370
Chr1	1019115	1019209	Ara_M5_peak_667	443	.	3.47819	46.3182	44.3859	46
Chr1	1022075	1022456	Ara_M5_peak_668	236	.	2.67324	25.3088	23.6931	76
Chr1	1022612	1022901	Ara_M5_peak_669	259	.	2.79728	27.5867	25.9289	241
Chr1	1023152	1023284	Ara_M5_peak_670	286	.	2.90769	30.3832	28.6802	103
Chr1	1023774	1024723	Ara_M5_peak_671	1303	.	5.85219	133.203	130.391	633
Chr1	1028843	1029637	Ara_M5_peak_672	427	.	3.42298	44.6741	42.7637	394
Chr1	1030569	1030804	Ara_M5_peak_673	159	.	2.3556	17.4594	15.9876	32
Chr1	1030942	1031111	Ara_M5_peak_674	268	.	2.83408	28.5078	26.8348	116
Chr1	1033413	1033526	Ara_M5_peak_675	41	.	1.63788	5.29471	4.16835	105
Chr1	1036209	1036553	Ara_M5_peak_676	672	.	4.19591	69.4524	67.2398	107
Chr1	1040268	1040401	Ara_M5_peak_677	499	.	3.66222	51.9448	49.94	50
Chr1	1042835	1042967	Ara_M5_peak_678	71	.	1.85872	8.39112	7.14807	20
Chr1	1043236	1043426	Ara_M5_peak_679	250	.	2.76047	26.6769	25.0342	97
Chr1	1043867	1043952	Ara_M5_peak_680	159	.	2.3556	17.4594	15.9876	32
Chr1	1044237	1044345	Ara_M5_peak_681	37	.	1.60107	4.84152	3.73613	20
Chr1	1044570	1044891	Ara_M5_peak_682	141	.	2.26358	15.5807	14.149	13
Chr1	1045122	1045195	Ara_M5_peak_683	282	.	2.88929	29.9102	28.2147	38
Chr1	1049753	1050209	Ara_M5_peak_684	1428	.	6.14664	145.796	142.891	309
Chr1	1051146	1051385	Ara_M5_peak_685	527	.	3.75424	54.8401	52.7992	84
Chr1	1055657	1055755	Ara_M5_peak_686	37	.	1.60107	4.84152	3.73613	62
Chr1	1056866	1056984	Ara_M5_peak_687	41	.	1.63788	5.29471	4.16835	87
Chr1	1057163	1057256	Ara_M5_peak_688	31	.	1.54586	4.19719	3.12408	61
Chr1	1059297	1059498	Ara_M5_peak_689	505	.	3.68063	52.5196	50.5075	89
Chr1	1061026	1061252	Ara_M5_peak_690	107	.	2.07955	12.0863	10.7376	25
Chr1	1064316	1064588	Ara_M5_peak_691	2455	.	8.33662	248.965	245.579	201
Chr1	1070959	1071187	Ara_M5_peak_692	654	.	4.09593	67.5929	65.4016	52
Chr1	1071378	1073388	Ara_M5_peak_693	1316	.	5.79217	134.421	131.601	1900
Chr1	1080542	1081183	Ara_M5_peak_694	1401	.	6.05126	143.016	140.132	534
Chr1	1081304	1081363	Ara_M5_peak_695	190	.	2.47312	20.6071	19.0764	30
Chr1	1084300	1084929	Ara_M5_peak_696	744	.	4.26971	76.7788	74.4871	573
Chr1	1085561	1086225	Ara_M5_peak_697	2735	.	8.72018	276.98	273.53	186
Chr1	1096179	1096418	Ara_M5_peak_698	183	.	2.46602	19.8236	18.3043	107
Chr1	1096635	1097002	Ara_M5_peak_699	237	.	2.70526	25.3337	23.7139	232
Chr1	1097551	1097609	Ara_M5_peak_700	71	.	1.85872	8.39112	7.14807	32
Chr1	1099866	1100157	Ara_M5_peak_701	53	.	1.72989	6.50795	5.33121	247
Chr1	1101013	1101149	Ara_M5_peak_702	128	.	2.19137	14.2649	12.8646	108
Chr1	1101749	1102134	Ara_M5_peak_703	260	.	2.77613	27.755	26.0958	67
Chr1	1102485	1102710	Ara_M5_peak_704	148	.	2.28532	16.3444	14.8964	35
Chr1	1103105	1103616	Ara_M5_peak_705	354	.	3.13663	37.2076	35.4046	294
Chr1	1103949	1104159	Ara_M5_peak_706	485	.	3.46547	50.5018	48.5168	70
Chr1	1104401	1104608	Ara_M5_peak_707	674	.	3.93464	69.6935	67.4796	95
Chr1	1105464	1105576	Ara_M5_peak_708	194	.	2.4114	20.9663	19.4283	55
Chr1	1105956	1106469	Ara_M5_peak_709	644	.	3.87758	66.6309	64.4523	322
Chr1	1108624	1109478	Ara_M5_peak_710	858	.	4.6113	88.2274	85.8166	167
Chr1	1110798	1110900	Ara_M5_peak_711	15	.	1.38023	2.53056	1.56208	5
Chr1	1113860	1114443	Ara_M5_peak_712	422	.	3.40458	44.1307	42.2277	484
Chr1	1119705	1119802	Ara_M5_peak_713	29	.	1.52746	3.99205	2.93	62
Chr1	1120648	1120734	Ara_M5_peak_714	82	.	1.93233	9.5594	8.28007	17
Chr1	1121273	1121459	Ara_M5_peak_715	296	.	2.9445	31.3374	29.6192	149
Chr1	1123225	1123497	Ara_M5_peak_716	224	.	2.65005	24.0168	22.4199	145
Chr1	1124368	1124587	Ara_M5_peak_717	97	.	2.02434	11.1097	9.78669	173
Chr1	1125060	1125537	Ara_M5_peak_718	959	.	4.85628	98.479	95.9674	315
Chr1	1127987	1128105	Ara_M5_peak_719	24	.	1.44216	3.51384	2.48318	26
Chr1	1129390	1129823	Ara_M5_peak_720	764	.	3.97346	78.7471	76.434	308
Chr1	1129992	1130377	Ara_M5_peak_721	503	.	3.29478	52.3956	50.388	171
Chr1	1130992	1131083	Ara_M5_peak_722	156	.	2.18537	17.1361	15.6717	37
Chr1	1131389	1131599	Ara_M5_peak_723	174	.	2.24565	18.9138	17.4154	169
Chr1	1131736	1131968	Ara_M5_peak_724	276	.	2.61636	29.3768	27.6931	89
Chr1	1132720	1132852	Ara_M5_peak_725	123	.	2.01873	13.7514	12.3656	105
Chr1	1133697	1134795	Ara_M5_peak_726	682	.	3.75323	70.4798	68.258	734
Chr1	1135615	1135788	Ara_M5_peak_727	198	.	2.32677	21.3882	19.8423	145
Chr1	1136152	1136289	Ara_M5_peak_728	389	.	2.99713	40.8483	38.9935	88
Chr1	1138964	1139032	Ara_M5_peak_729	73	.	1.72551	8.64593	7.3992	40
Chr1	1139538	1140149	Ara_M5_peak_730	1500	.	5.39672	152.968	150.016	493
Chr1	1140595	1140680	Ara_M5_peak_731	46	.	1.57604	5.81974	4.67188	44
Chr1	1141342	1141829	Ara_M5_peak_732	1123	.	4.66893	114.998	112.339	47
Chr1	1143022	1143303	Ara_M5_peak_733	1819	.	5.85617	185.098	181.952	170
Chr1	1143727	1144126	Ara_M5_peak_734	605	.	3.4226	62.668	60.5341	189
Chr1	1144553	1144623	Ara_M5_peak_735	14	.	1.30742	2.38224	1.42587	2
Chr1	1145059	1145231	Ara_M5_peak_736	122	.	2.02487	13.5854	12.2015	132
Chr1	1145680	1145955	Ara_M5_peak_737	82	.	1.84525	9.54358	8.26932	182
Chr1	1146649	1146808	Ara_M5_peak_738	39	.	1.58611	5.07347	3.95742	15
Chr1	1147520	1147742	Ara_M5_peak_739	220	.	2.57788	23.6456	22.0558	142
Chr1	1148528	1148809	Ara_M5_peak_740	171	.	2.41081	18.6268	17.1312	184
Chr1	1154560	1155111	Ara_M5_peak_741	329	.	3.07332	34.7605	32.9901	405
Chr1	1157851	1158075	Ara_M5_peak_742	291	.	2.9261	30.8589	29.1483	54
Chr1	1158331	1158602	Ara_M5_peak_743	53	.	1.72989	6.50795	5.33121	238
Chr1	1158854	1159514	Ara_M5_peak_744	339	.	3.11013	35.762	33.9768	135
Chr1	1159956	1160061	Ara_M5_peak_745	100	.	2.04275	11.4314	10.0998	28
Chr1	1161229	1161467	Ara_M5_peak_746	91	.	1.98754	10.4778	9.17206	119
Chr1	1161950	1162155	Ara_M5_peak_747	380	.	3.25735	39.8685	38.0243	27
Chr1	1162537	1162650	Ara_M5_peak_748	55	.	1.7483	6.76402	5.57757	15
Chr1	1162771	1162906	Ara_M5_peak_749	141	.	2.26358	15.5807	14.149	96
Chr1	1163636	1163732	Ara_M5_peak_750	35	.	1.58267	4.62197	3.52719	67
Chr1	1164887	1165278	Ara_M5_peak_751	268	.	2.83408	28.5078	26.8348	136
Chr1	1166572	1166922	Ara_M5_peak_752	251	.	2.67142	26.8431	25.1991	292
Chr1	1167069	1167381	Ara_M5_peak_753	388	.	3.18735	40.7466	38.8925	46
Chr1	1168847	1168940	Ara_M5_peak_754	337	.	2.97196	35.4997	33.7201	51
Chr1	1169137	1170148	Ara_M5_peak_755	637	.	3.85529	65.9093	63.7385	629
Chr1	1170632	1170712	Ara_M5_peak_756	162	.	2.29167	17.7199	16.2455	28
Chr1	1171648	1171801	Ara_M5_peak_757	1659	.	6.32548	168.99	165.935	68
Chr1	1172871	1173599	Ara_M5_peak_758	174	.	2.41369	18.9278	17.4292	575
Chr1	1174248	1174503	Ara_M5_peak_759	369	.	3.22055	38.827	36.9976	122
Chr1	1174931	1175157	Ara_M5_peak_760	68	.	1.84031	8.10934	6.8755	43
Chr1	1176500	1176591	Ara_M5_peak_761	104	.	2.06115	11.757	10.4168	39
Chr1	1179232	1179370	Ara_M5_peak_762	85	.	1.95073	9.86158	8.57336	95
Chr1	1183666	1183778	Ara_M5_peak_763	557	.	3.84625	57.7883	55.7117	57
Chr1	1183912	1184147	Ara_M5_peak_764	380	.	3.25735	39.8685	38.0243	79
Chr1	1185418	1185720	Ara_M5_peak_765	359	.	3.18374	37.7953	35.9807	239
Chr1	1188298	1189081	Ara_M5_peak_766	1559	.	6.28465	158.968	155.975	107
Chr1	1191358	1191588	Ara_M5_peak_767	1996	.	6.85774	202.863	199.63	86
Chr1	1193700	1194348	Ara_M5_peak_768	2437	.	7.7806	247.081	243.701	138
Chr1	1195075	1195160	Ara_M5_peak_769	33	.	1.54929	4.42002	3.33577	72
Chr1	1195830	1195983	Ara_M5_peak_770	120	.	2.11393	13.4097	12.0322	102
Chr1	1196817	1197011	Ara_M5_peak_771	171	.	2.39958	18.5936	17.1024	169
Chr1	1197640	1198208	Ara_M5_peak_772	405	.	3.25556	42.392	40.5156	404
Chr1	1201266	1201612	Ara_M5_peak_773	191	.	2.50283	20.6374	19.1024	272
Chr1	1201951	1202295	Ara_M5_peak_774	703	.	4.28793	72.638	70.3901	116
Chr1	1205785	1205916	Ara_M5_peak_775	237	.	2.70526	25.3337	23.7139	28
Chr1	1206150	1206212	Ara_M5_peak_776	163	.	2.374	17.8452	16.3654	32
Chr1	1206517	1206687	Ara_M5_peak_777	598	.	3.97508	62.0023	59.8757	108
Chr1	1207180	1207320	Ara_M5_peak_778	755	.	4.43515	77.831	75.5264	38
Chr1	1207952	1208258	Ara_M5_peak_779	187	.	2.48442	20.2289	18.7018	207
Chr1	1210954	1211100	Ara_M5_peak_780	390	.	3.29416	40.9197	39.0609	42
Chr1	1215109	1215285	Ara_M5_peak_781	68	.	1.84031	8.10934	6.8755	147
Chr1	1215417	1215664	Ara_M5_peak_782	187	.	2.48442	20.2289	18.7018	117
Chr1	1215786	1216139	Ara_M5_peak_783	868	.	4.74801	89.2429	86.82	107
Chr1	1216613	1216773	Ara_M5_peak_784	66	.	1.82191	7.83174	6.60726	126
Chr1	1217020	1217129	Ara_M5_peak_785	31	.	1.54586	4.19719	3.12408	6
Chr1	1217293	1217413	Ara_M5_peak_786	91	.	1.98754	10.4778	9.17206	99
Chr1	1220795	1221273	Ara_M5_peak_787	331	.	3.02406	34.9033	33.1318	36
Chr1	1221392	1221646	Ara_M5_peak_788	85	.	1.91544	9.81486	8.53208	197
Chr1	1222068	1222184	Ara_M5_peak_789	160	.	2.32577	17.5186	16.0461	63
Chr1	1222355	1222455	Ara_M5_peak_790	389	.	3.25261	40.8514	38.9966	53
Chr1	1224503	1224789	Ara_M5_peak_791	976	.	4.99519	100.211	97.6847	114
Chr1	1225083	1225352	Ara_M5_peak_792	260	.	2.786	27.7454	26.0863	113
Chr1	1225475	1225715	Ara_M5_peak_793	47	.	1.6814	5.93892	4.78899	161
Chr1	1226012	1226607	Ara_M5_peak_794	1198	.	5.57979	122.567	119.843	506
Chr1	1228567	1228663	Ara_M5_peak_795	46	.	1.66696	5.83752	4.68937	49
Chr1	1230863	1231063	Ara_M5_peak_796	237	.	2.6947	25.3296	23.7137	124
Chr1	1231384	1231575	Ara_M5_peak_797	124	.	2.16161	13.8617	12.4703	134
Chr1	1232292	1232362	Ara_M5_peak_798	34	.	1.56318	4.55549	3.46849	16
Chr1	1232494	1232602	Ara_M5_peak_799	213	.	2.56742	22.8962	21.3209	61
Chr1	1233217	1233885	Ara_M5_peak_800	432	.	3.42445	45.1557	43.2421	454
Chr1	1234047	1234474	Ara_M5_peak_801	152	.	2.29995	16.6693	15.2178	97
Chr1	1235983	1236149	Ara_M5_peak_802	1049	.	5.14806	107.532	104.94	132
Chr1	1236334	1236858	Ara_M5_peak_803	774	.	4.45317	79.7318	77.41	107
Chr1	1238973	1239090	Ara_M5_peak_804	454	.	3.515	47.4256	45.4787	81
Chr1	1239728	1239927	Ara_M5_peak_805	58	.	1.7667	7.02448	5.82844	163
Chr1	1240226	1240425	Ara_M5_peak_806	755	.	4.43515	77.831	75.5264	77
Chr1	1242181	1242355	Ara_M5_peak_807	94	.	2.00594	10.7919	9.47742	142
Chr1	1242532	1242685	Ara_M5_peak_808	315	.	3.01811	33.2777	31.5296	35
Chr1	1244029	1244515	Ara_M5_peak_809	834	.	4.65599	85.8347	83.4459	309
Chr1	1244658	1244796	Ara_M5_peak_810	66	.	1.82191	7.83174	6.60726	51
Chr1	1246200	1246347	Ara_M5_peak_811	533	.	3.77264	55.4256	53.3775	72
Chr1	1248683	1249465	Ara_M5_peak_812	493	.	3.64382	51.3722	49.3746	352
Chr1	1251690	1251796	Ara_M5_peak_813	175	.	2.42921	19.0225	17.5189	72
Chr1	1252068	1252209	Ara_M5_peak_814	60	.	1.7851	7.28928	6.0837	115
Chr1	1258312	1258513	Ara_M5_peak_815	476	.	3.58861	49.6675	47.6916	91
Chr1	1261411	1261745	Ara_M5_peak_816	1524	.	6.36748	155.459	152.488	174
Chr1	1272503	1272779	Ara_M5_peak_817	943	.	4.95044	96.8873	94.3902	109
Chr1	1274084	1274400	Ara_M5_peak_818	684	.	4.23272	70.721	68.4943	238
Chr1	1275489	1275550	Ara_M5_peak_819	315	.	3.01811	33.2777	31.5296	23
Chr1	1278673	1278767	Ara_M5_peak_820	97	.	2.02434	11.1097	9.78669	50
Chr1	1280298	1280356	Ara_M5_peak_821	134	.	2.22678	14.8532	13.4379	13
Chr1	1280893	1281314	Ara_M5_peak_822	94	.	2.00594	10.7919	9.47742	314
Chr1	1281948	1282239	Ara_M5_peak_823	183	.	2.46602	19.8236	18.3043	122
Chr1	1286526	1286747	Ara_M5_peak_824	411	.	3.36777	43.0509	41.1625	121
Chr1	1287049	1287110	Ara_M5_peak_825	148	.	2.30039	16.322	14.8742	23
Chr1	1287250	1287308	Ara_M5_peak_826	53	.	1.72989	6.50795	5.33121	34
Chr1	1288808	1288936	Ara_M5_peak_827	282	.	2.88929	29.9102	28.2147	94
Chr1	1290486	1290602	Ara_M5_peak_828	36	.	1.59449	4.77773	3.67988	50
Chr1	1291062	1291333	Ara_M5_peak_829	1926	.	7.25083	195.858	192.656	102
Chr1	1291899	1292086	Ara_M5_peak_830	296	.	2.9445	31.3374	29.6192	129
Chr1	1293182	1293500	Ara_M5_peak_831	228	.	2.66845	24.4528	22.8483	35
Chr1	1293627	1293918	Ara_M5_peak_832	117	.	2.13476	13.0966	11.7226	50
Chr1	1294237	1294816	Ara_M5_peak_833	395	.	3.31256	41.449	39.5828	72
Chr1	1298306	1298385	Ara_M5_peak_834	66	.	1.82191	7.83174	6.60726	52
Chr1	1298944	1299193	Ara_M5_peak_835	527	.	3.75424	54.8401	52.7992	191
Chr1	1299345	1299740	Ara_M5_peak_836	375	.	3.23895	39.3465	37.5098	218
Chr1	1300043	1300290	Ara_M5_peak_837	433	.	3.44139	45.2198	43.3022	31
Chr1	1301991	1302095	Ara_M5_peak_838	71	.	1.85872	8.39112	7.14807	37
Chr1	1302754	1302858	Ara_M5_peak_839	25	.	1.47904	3.55855	2.52684	101
Chr1	1303071	1303294	Ara_M5_peak_840	233	.	2.5838	24.9186	23.3062	154
Chr1	1304554	1304674	Ara_M5_peak_841	66	.	1.78444	7.90651	6.68092	17
Chr1	1305578	1305874	Ara_M5_peak_842	346	.	3.0466	36.446	34.6521	97
Chr1	1305992	1306183	Ara_M5_peak_843	583	.	3.71518	60.4804	58.3735	124
Chr1	1306556	1306737	Ara_M5_peak_844	290	.	2.73785	30.7241	29.0184	128
Chr1	1307037	1307325	Ara_M5_peak_845	149	.	2.18179	16.4471	14.9981	115
Chr1	1307829	1308258	Ara_M5_peak_846	888	.	4.23931	91.2807	88.8409	124
Chr1	1309295	1309415	Ara_M5_peak_847	109	.	1.91417	12.3108	10.9595	42
Chr1	1310308	1310390	Ara_M5_peak_848	176	.	2.19994	19.193	17.6877	32
Chr1	1310907	1311453	Ara_M5_peak_849	412	.	2.96519	43.1576	41.2684	46
Chr1	1311913	1312017	Ara_M5_peak_850	27	.	1.44369	3.77903	2.73532	75
Chr1	1312589	1313605	Ara_M5_peak_851	1548	.	5.69458	157.872	154.888	250
Chr1	1315656	1315867	Ara_M5_peak_852	163	.	2.32841	17.7987	16.3235	180
Chr1	1320774	1321501	Ara_M5_peak_853	774	.	4.49036	79.8082	77.4825	100
Chr1	1321691	1321940	Ara_M5_peak_854	888	.	4.80322	91.3079	88.8646	176
Chr1	1324563	1324918	Ara_M5_peak_855	179	.	2.44762	19.4214	17.91	225
Chr1	1325072	1325277	Ara_M5_peak_856	211	.	2.59484	22.7267	21.1529	92
Chr1	1331194	1331791	Ara_M5_peak_857	1130	.	5.42892	115.716	113.05	109
Chr1	1332292	1332412	Ara_M5_peak_858	41	.	1.63788	5.29471	4.16835	20
Chr1	1333523	1334019	Ara_M5_peak_859	315	.	3.01811	33.2777	31.5296	44
Chr1	1334249	1334591	Ara_M5_peak_860	100	.	2.02494	11.3822	10.0558	134
Chr1	1335804	1335894	Ara_M5_peak_861	13	.	1.33094	2.25505	1.31048	85
Chr1	1336298	1336433	Ara_M5_peak_862	256	.	2.70529	27.2512	25.6001	30
Chr1	1337812	1338196	Ara_M5_peak_863	437	.	3.45327	45.6552	43.7347	108
Chr1	1338371	1339689	Ara_M5_peak_864	610	.	4.01188	63.2244	61.0836	319
Chr1	1340704	1340793	Ara_M5_peak_865	34	.	1.55306	4.53381	3.44725	10
Chr1	1343633	1344180	Ara_M5_peak_866	527	.	3.75424	54.8401	52.7992	491
Chr1	1344756	1345025	Ara_M5_peak_867	1152	.	5.48413	117.954	115.269	136
Chr1	1348497	1348606	Ara_M5_peak_868	54	.	1.71498	6.67925	5.49969	24
Chr1	1349275	1350210	Ara_M5_peak_869	3705	.	10.6738	374.117	370.531	744
Chr1	1355304	1356436	Ara_M5_peak_870	2483	.	8.39183	251.758	248.365	662
Chr1	1358353	1358537	Ara_M5_peak_871	1012	.	5.08888	103.832	101.273	58
Chr1	1359521	1359618	Ara_M5_peak_872	30	.	1.53435	4.12807	3.06312	86
Chr1	1360530	1360644	Ara_M5_peak_873	49	.	1.67946	6.07286	4.91482	26
Chr1	1361950	1362543	Ara_M5_peak_874	460	.	3.5334	47.9827	46.0285	123
Chr1	1364947	1365142	Ara_M5_peak_875	936	.	4.93204	96.1841	93.6936	119
Chr1	1368762	1369234	Ara_M5_peak_876	827	.	4.63759	85.1581	82.7763	167
Chr1	1373062	1373120	Ara_M5_peak_877	137	.	2.24518	15.2152	13.7917	21
Chr1	1373370	1373601	Ara_M5_peak_878	97	.	2.02434	11.1097	9.78669	92
Chr1	1375697	1375916	Ara_M5_peak_879	1043	.	5.20809	106.897	104.308	145
Chr1	1379184	1379345	Ara_M5_peak_880	77	.	1.89552	8.9671	7.70575	36
Chr1	1380036	1380204	Ara_M5_peak_881	91	.	1.98754	10.4778	9.17206	23
Chr1	1383693	1383882	Ara_M5_peak_882	1428	.	6.14664	145.796	142.891	111
Chr1	1389004	1389116	Ara_M5_peak_883	50	.	1.71149	6.2563	5.08942	91
Chr1	1391145	1391381	Ara_M5_peak_884	117	.	2.13476	13.0966	11.7226	28
Chr1	1391559	1391739	Ara_M5_peak_885	245	.	2.74207	26.2263	24.5912	135
Chr1	1393401	1393523	Ara_M5_peak_886	68	.	1.84031	8.10934	6.8755	103
Chr1	1396008	1396228	Ara_M5_peak_887	1035	.	5.18968	106.172	103.589	126
Chr1	1396389	1396458	Ara_M5_peak_888	53	.	1.72989	6.50795	5.33121	34
Chr1	1399034	1399249	Ara_M5_peak_889	557	.	3.84625	57.7883	55.7117	116
Chr1	1400637	1400940	Ara_M5_peak_890	148	.	2.30039	16.322	14.8742	256
Chr1	1402929	1403149	Ara_M5_peak_891	66	.	1.82191	7.83174	6.60726	134
Chr1	1407466	1408212	Ara_M5_peak_892	1204	.	5.61295	123.227	120.497	91
Chr1	1410713	1411179	Ara_M5_peak_893	761	.	4.45356	78.4883	76.1767	271
Chr1	1416120	1416285	Ara_M5_peak_894	339	.	3.11013	35.762	33.9768	51
Chr1	1416405	1416521	Ara_M5_peak_895	71	.	1.85872	8.39112	7.14807	88
Chr1	1417154	1417234	Ara_M5_peak_896	20	.	1.43544	3.04053	2.0357	26
Chr1	1418506	1418674	Ara_M5_peak_897	1060	.	5.09781	108.675	106.072	68
Chr1	1418864	1418948	Ara_M5_peak_898	24	.	1.46324	3.50894	2.47839	71
Chr1	1419068	1419226	Ara_M5_peak_899	123	.	2.10599	13.6878	12.3027	45
Chr1	1421857	1421960	Ara_M5_peak_900	409	.	3.14663	42.8481	40.9648	61
Chr1	1422111	1423048	Ara_M5_peak_901	549	.	3.55704	57.0278	54.963	625
Chr1	1423174	1423648	Ara_M5_peak_902	169	.	2.27899	18.4489	16.959	173
Chr1	1423799	1424323	Ara_M5_peak_903	704	.	4.05491	72.7354	70.487	311
Chr1	1424636	1424756	Ara_M5_peak_904	29	.	1.49776	3.9902	2.93	105
Chr1	1425107	1425232	Ara_M5_peak_905	199	.	2.43926	21.5512	19.9999	93
Chr1	1425473	1425561	Ara_M5_peak_906	231	.	2.5679	24.7982	23.1907	37
Chr1	1426563	1426827	Ara_M5_peak_907	238	.	2.56573	25.4886	23.8675	79
Chr1	1428533	1428667	Ara_M5_peak_908	60	.	1.77514	7.24029	6.04083	114
Chr1	1430094	1430383	Ara_M5_peak_909	74	.	1.83554	8.73358	7.48058	116
Chr1	1430974	1431458	Ara_M5_peak_910	292	.	2.84561	30.9484	29.2372	347
Chr1	1431677	1431796	Ara_M5_peak_911	65	.	1.80327	7.81374	6.59476	49
Chr1	1432788	1432985	Ara_M5_peak_912	199	.	2.4834	21.4475	19.901	156
Chr1	1433192	1434928	Ara_M5_peak_913	557	.	3.69683	57.8448	55.7679	1544
Chr1	1436728	1436788	Ara_M5_peak_914	94	.	1.98148	10.7374	9.42837	33
Chr1	1437525	1438239	Ara_M5_peak_915	816	.	4.55882	83.9748	81.6061	78
Chr1	1441382	1441501	Ara_M5_peak_916	107	.	2.07955	12.0863	10.7376	30
Chr1	1445024	1445145	Ara_M5_peak_917	364	.	3.20214	38.3099	36.4879	42
Chr1	1447373	1447573	Ara_M5_peak_918	55	.	1.7483	6.76402	5.57757	101
Chr1	1448550	1448643	Ara_M5_peak_919	46	.	1.67468	5.76641	4.61949	41
Chr1	1448767	1448873	Ara_M5_peak_920	50	.	1.71149	6.2563	5.08942	66
Chr1	1450855	1451239	Ara_M5_peak_921	1565	.	6.4595	159.539	156.542	70
Chr1	1454561	1454651	Ara_M5_peak_922	60	.	1.72013	7.23769	6.03828	4
Chr1	1454792	1454941	Ara_M5_peak_923	116	.	2.03643	13.0513	11.6823	19
Chr1	1455163	1455499	Ara_M5_peak_924	1871	.	6.50535	190.369	187.196	166
Chr1	1455835	1456026	Ara_M5_peak_925	289	.	2.78154	30.6868	28.9813	153
Chr1	1456256	1456332	Ara_M5_peak_926	120	.	2.08697	13.4163	12.0387	52
Chr1	1456476	1457156	Ara_M5_peak_927	688	.	4.04143	71.0553	68.8267	217
Chr1	1458658	1459082	Ara_M5_peak_928	563	.	3.53135	58.4	56.3161	247
Chr1	1460831	1460905	Ara_M5_peak_929	15	.	1.38023	2.53056	1.56208	2
Chr1	1461550	1461665	Ara_M5_peak_930	29	.	1.52746	3.99205	2.93	88
Chr1	1461823	1461974	Ara_M5_peak_931	91	.	1.98754	10.4778	9.17206	115
Chr1	1462152	1463136	Ara_M5_peak_932	1900	.	7.19562	193.255	190.066	113
Chr1	1467745	1467805	Ara_M5_peak_933	88	.	1.96913	10.1677	8.87068	45
Chr1	1468195	1468356	Ara_M5_peak_934	82	.	1.93233	9.5594	8.28007	69
Chr1	1468584	1468735	Ara_M5_peak_935	50	.	1.71149	6.2563	5.08942	96
Chr1	1469201	1469635	Ara_M5_peak_936	219	.	2.63165	23.5837	21.9945	314
Chr1	1470672	1470732	Ara_M5_peak_937	66	.	1.82191	7.83174	6.60726	18
Chr1	1471148	1471404	Ara_M5_peak_938	100	.	2.04275	11.4314	10.0998	152
Chr1	1471535	1471701	Ara_M5_peak_939	74	.	1.87712	8.67705	7.42486	141
Chr1	1476131	1476412	Ara_M5_peak_940	909	.	4.85843	93.3879	90.924	49
Chr1	1476798	1477648	Ara_M5_peak_941	574	.	3.90146	59.5821	57.484	485
Chr1	1478807	1479773	Ara_M5_peak_942	344	.	3.05759	36.2504	34.4615	357
Chr1	1479960	1480299	Ara_M5_peak_943	159	.	2.30036	17.3819	15.915	100
Chr1	1480560	1480664	Ara_M5_peak_944	32	.	1.53904	4.35764	3.28122	13
Chr1	1480796	1481118	Ara_M5_peak_945	91	.	1.94848	10.4747	9.17206	234
Chr1	1481546	1481678	Ara_M5_peak_946	39	.	1.61551	5.07171	3.95569	113
Chr1	1481948	1482656	Ara_M5_peak_947	1166	.	5.34661	119.343	116.649	487
Chr1	1483894	1484157	Ara_M5_peak_948	40	.	1.60109	5.14549	4.02809	101
Chr1	1486911	1487430	Ara_M5_peak_949	1476	.	6.25706	150.604	147.666	43
Chr1	1490900	1491056	Ara_M5_peak_950	215	.	2.61324	23.1537	21.5722	48
Chr1	1494208	1494972	Ara_M5_peak_951	1176	.	5.3417	120.367	117.662	93
Chr1	1495311	1495584	Ara_M5_peak_952	196	.	2.46589	21.174	19.6301	91
Chr1	1495759	1495817	Ara_M5_peak_953	102	.	2.00453	11.5491	10.2161	4
Chr1	1496165	1496344	Ara_M5_peak_954	182	.	2.40743	19.7404	18.2259	52
Chr1	1496538	1496831	Ara_M5_peak_955	238	.	2.65508	25.4856	23.8645	54
Chr1	1497413	1498168	Ara_M5_peak_956	651	.	3.99477	67.3412	65.1549	626
Chr1	1498305	1498366	Ara_M5_peak_957	114	.	2.06963	12.7965	11.4304	35
Chr1	1502238	1502356	Ara_M5_peak_958	252	.	2.6567	26.905	25.2604	89
Chr1	1503778	1504524	Ara_M5_peak_959	1115	.	5.39212	114.231	111.578	235
Chr1	1504714	1505367	Ara_M5_peak_960	854	.	4.7112	87.8745	85.4654	72
Chr1	1510284	1510380	Ara_M5_peak_961	354	.	3.16534	37.2832	35.4759	57
Chr1	1510957	1511209	Ara_M5_peak_962	104	.	2.06115	11.757	10.4168	214
Chr1	1511581	1511905	Ara_M5_peak_963	329	.	3.07332	34.7605	32.9901	239
Chr1	1516152	1516292	Ara_M5_peak_964	77	.	1.89552	8.9671	7.70575	92
Chr1	1517874	1517997	Ara_M5_peak_965	159	.	2.3556	17.4594	15.9876	54
Chr1	1518764	1519000	Ara_M5_peak_966	438	.	3.45979	45.7679	43.843	32
Chr1	1519872	1520127	Ara_M5_peak_967	320	.	3.03652	33.7694	32.0138	169
Chr1	1520446	1520780	Ara_M5_peak_968	1917	.	7.23243	194.989	191.791	66
Chr1	1523499	1523649	Ara_M5_peak_969	58	.	1.7667	7.02448	5.82844	32
Chr1	1524057	1524157	Ara_M5_peak_970	31	.	1.54586	4.19719	3.12408	8
Chr1	1524647	1524758	Ara_M5_peak_971	141	.	2.26358	15.5807	14.149	94
Chr1	1524906	1525259	Ara_M5_peak_972	159	.	2.3556	17.4594	15.9876	121
Chr1	1525377	1525549	Ara_M5_peak_973	395	.	3.31256	41.449	39.5828	64
Chr1	1528539	1528669	Ara_M5_peak_974	33	.	1.56427	4.40718	3.32319	95
Chr1	1529144	1529316	Ara_M5_peak_975	211	.	2.59484	22.7267	21.1529	127
Chr1	1529650	1529798	Ara_M5_peak_976	592	.	3.95667	61.3942	59.2748	54
Chr1	1531260	1531399	Ara_M5_peak_977	482	.	3.60701	50.2336	48.2503	103
Chr1	1534339	1534957	Ara_M5_peak_978	794	.	4.54557	81.8014	79.4545	57
Chr1	1543622	1543712	Ara_M5_peak_979	97	.	2.02434	11.1097	9.78669	41
Chr1	1545112	1545569	Ara_M5_peak_980	1996	.	7.39806	202.846	199.613	114
Chr1	1545693	1545879	Ara_M5_peak_981	84	.	1.92354	9.68573	8.40471	71
Chr1	1545996	1547015	Ara_M5_peak_982	1854	.	6.95373	188.631	185.467	627
Chr1	1547786	1547917	Ara_M5_peak_983	110	.	2.06811	12.4037	11.0513	95
Chr1	1548583	1548825	Ara_M5_peak_984	118	.	2.07699	13.18	11.8051	95
Chr1	1549740	1549861	Ara_M5_peak_985	191	.	2.38351	20.6382	19.1032	84
Chr1	1550268	1550440	Ara_M5_peak_986	361	.	3.10041	37.9814	36.1655	48
Chr1	1550616	1550775	Ara_M5_peak_987	128	.	2.17649	14.2726	12.8723	103
Chr1	1552668	1552812	Ara_M5_peak_988	55	.	1.7483	6.76402	5.57757	117
Chr1	1553071	1553627	Ara_M5_peak_989	516	.	3.71743	53.6756	51.6491	479
Chr1	1554495	1554622	Ara_M5_peak_990	134	.	2.22678	14.8532	13.4379	76
Chr1	1557711	1558132	Ara_M5_peak_991	107	.	2.07955	12.0863	10.7376	398
Chr1	1558489	1558585	Ara_M5_peak_992	58	.	1.7667	7.02448	5.82844	68
Chr1	1558718	1559401	Ara_M5_peak_993	551	.	3.82785	57.1945	55.1251	585
Chr1	1559726	1560020	Ara_M5_peak_994	379	.	3.23921	39.7736	37.9339	112
Chr1	1560299	1560537	Ara_M5_peak_995	180	.	2.42801	19.5303	18.0178	23
Chr1	1564096	1564622	Ara_M5_peak_996	862	.	4.59867	88.6232	86.2069	411
Chr1	1567810	1568014	Ara_M5_peak_997	88	.	1.91786	10.1523	8.86025	149
Chr1	1568833	1569016	Ara_M5_peak_998	196	.	2.44137	21.1878	19.6438	129
Chr1	1569189	1569515	Ara_M5_peak_999	438	.	3.38428	45.8028	43.8777	231
Chr1	1569980	1570212	Ara_M5_peak_1000	284	.	2.89021	30.103	28.406	176
Chr1	1570521	1570790	Ara_M5_peak_1001	398	.	3.30051	41.6781	39.8104	168
Chr1	1572455	1572581	Ara_M5_peak_1002	1270	.	5.4453	129.794	127.012	89
Chr1	1572804	1572883	Ara_M5_peak_1003	48	.	1.65712	6.02783	4.87056	44
Chr1	1575359	1575456	Ara_M5_peak_1004	31	.	1.54586	4.19719	3.12408	88
Chr1	1575791	1576000	Ara_M5_peak_1005	224	.	2.65005	24.0168	22.4199	167
Chr1	1576173	1576289	Ara_M5_peak_1006	25	.	1.49065	3.59647	2.55692	108
Chr1	1576480	1576878	Ara_M5_peak_1007	1296	.	5.83379	132.427	129.622	160
Chr1	1581219	1581291	Ara_M5_peak_1008	68	.	1.84031	8.10934	6.8755	35
Chr1	1582297	1582754	Ara_M5_peak_1009	228	.	2.66845	24.4528	22.8483	81
Chr1	1583634	1584196	Ara_M5_peak_1010	1075	.	5.08178	110.133	107.518	415
Chr1	1587705	1588647	Ara_M5_peak_1011	1029	.	4.99804	105.549	102.972	492
Chr1	1589849	1590083	Ara_M5_peak_1012	592	.	3.95667	61.3942	59.2748	157
Chr1	1590712	1590829	Ara_M5_peak_1013	41	.	1.63788	5.29471	4.16835	23
Chr1	1591362	1591696	Ara_M5_peak_1014	76	.	1.87963	8.92448	7.66875	50
Chr1	1591827	1591976	Ara_M5_peak_1015	201	.	2.51895	21.7192	20.1664	32
Chr1	1592455	1592573	Ara_M5_peak_1016	121	.	2.14984	13.4985	12.1155	70
Chr1	1593860	1594211	Ara_M5_peak_1017	191	.	2.50283	20.6374	19.1024	32
Chr1	1595813	1596132	Ara_M5_peak_1018	500	.	3.63856	52.0206	50.0153	123
Chr1	1596267	1596473	Ara_M5_peak_1019	72	.	1.85932	8.46864	7.22449	49
Chr1	1596724	1596846	Ara_M5_peak_1020	27	.	1.50906	3.79179	2.74092	113
Chr1	1597899	1598169	Ara_M5_peak_1021	1381	.	6.03623	141.033	138.163	203
Chr1	1598624	1598953	Ara_M5_peak_1022	187	.	2.48442	20.2289	18.7018	249
Chr1	1599796	1599970	Ara_M5_peak_1023	1265	.	5.76018	129.338	126.558	44
Chr1	1604999	1605539	Ara_M5_peak_1024	1108	.	5.37371	113.491	110.844	104
Chr1	1606383	1607012	Ara_M5_peak_1025	245	.	2.74207	26.2263	24.5912	416
Chr1	1607692	1607902	Ara_M5_peak_1026	175	.	2.42921	19.0225	17.5189	97
Chr1	1608247	1608399	Ara_M5_peak_1027	123	.	2.17157	13.7885	12.3979	24
Chr1	1608674	1608791	Ara_M5_peak_1028	35	.	1.58267	4.62197	3.52719	105
Chr1	1611640	1611975	Ara_M5_peak_1029	85	.	1.95073	9.86158	8.57336	130
Chr1	1612559	1612704	Ara_M5_peak_1030	476	.	3.58861	49.6675	47.6916	46
Chr1	1613043	1613189	Ara_M5_peak_1031	354	.	3.16534	37.2832	35.4759	51
Chr1	1615080	1615235	Ara_M5_peak_1032	88	.	1.96913	10.1677	8.87068	19
Chr1	1615717	1615919	Ara_M5_peak_1033	27	.	1.50906	3.79179	2.74092	21
Chr1	1616295	1616355	Ara_M5_peak_1034	120	.	2.15317	13.4407	12.0584	18
Chr1	1616686	1616810	Ara_M5_peak_1035	134	.	2.22678	14.8532	13.4379	85
Chr1	1617190	1617393	Ara_M5_peak_1036	1093	.	5.33691	112.015	109.381	114
Chr1	1618088	1618308	Ara_M5_peak_1037	2128	.	7.6741	216.134	212.852	105
Chr1	1623519	1623693	Ara_M5_peak_1038	55	.	1.7483	6.76402	5.57757	16
Chr1	1623874	1624962	Ara_M5_peak_1039	1280	.	5.79699	130.88	128.087	983
Chr1	1629146	1629475	Ara_M5_peak_1040	68	.	1.84031	8.10934	6.8755	280
Chr1	1630726	1631045	Ara_M5_peak_1041	117	.	2.13476	13.0966	11.7226	24
Chr1	1635806	1635937	Ara_M5_peak_1042	493	.	3.64382	51.3722	49.3746	68
Chr1	1636073	1636476	Ara_M5_peak_1043	207	.	2.57644	22.3027	20.7366	291
Chr1	1637865	1638054	Ara_M5_peak_1044	433	.	3.44139	45.2198	43.3022	138
Chr1	1639012	1639551	Ara_M5_peak_1045	422	.	3.40458	44.1307	42.2277	151
Chr1	1642746	1643252	Ara_M5_peak_1046	579	.	3.77298	60.0834	57.9823	297
Chr1	1644085	1644511	Ara_M5_peak_1047	1144	.	5.34963	117.151	114.476	110
Chr1	1645248	1645473	Ara_M5_peak_1048	536	.	3.77385	55.7056	53.6559	144
Chr1	1645604	1645773	Ara_M5_peak_1049	552	.	3.81907	57.2994	55.2293	54
Chr1	1647117	1647909	Ara_M5_peak_1050	411	.	3.36777	43.0509	41.1625	106
Chr1	1656746	1656862	Ara_M5_peak_1051	85	.	1.95073	9.86158	8.57336	107
Chr1	1659453	1659679	Ara_M5_peak_1052	2134	.	7.51438	216.753	213.47	135
Chr1	1659903	1660189	Ara_M5_peak_1053	374	.	3.16502	39.3222	37.4893	128
Chr1	1660403	1660960	Ara_M5_peak_1054	904	.	4.69604	92.8757	90.4178	100
Chr1	1661099	1661691	Ara_M5_peak_1055	518	.	3.62054	53.9064	51.8785	377
Chr1	1662233	1662538	Ara_M5_peak_1056	524	.	3.65195	54.4927	52.4576	114
Chr1	1663238	1663431	Ara_M5_peak_1057	185	.	2.44372	20.0296	18.5084	123
Chr1	1664597	1664678	Ara_M5_peak_1058	30	.	1.53499	4.13403	3.06895	79
Chr1	1667165	1667315	Ara_M5_peak_1059	35	.	1.58267	4.62197	3.52719	114
Chr1	1669182	1669416	Ara_M5_peak_1060	232	.	2.68686	24.8918	23.2796	211
Chr1	1671279	1671354	Ara_M5_peak_1061	228	.	2.66845	24.4528	22.8483	52
Chr1	1671709	1671941	Ara_M5_peak_1062	1007	.	5.11607	103.287	100.73	105
Chr1	1678749	1679135	Ara_M5_peak_1063	199	.	2.53963	21.4638	19.9133	92
Chr1	1680653	1680818	Ara_M5_peak_1064	207	.	2.57644	22.3027	20.7366	62
Chr1	1681571	1682229	Ara_M5_peak_1065	729	.	4.36154	75.2199	72.9438	528
Chr1	1689778	1690129	Ara_M5_peak_1066	228	.	2.66845	24.4528	22.8483	85
Chr1	1692211	1692550	Ara_M5_peak_1067	156	.	2.3372	17.0769	15.613	308
Chr1	1693054	1693140	Ara_M5_peak_1068	79	.	1.91393	9.26123	7.99082	44
Chr1	1693609	1693905	Ara_M5_peak_1069	359	.	3.18374	37.7953	35.9807	170
Chr1	1696061	1696447	Ara_M5_peak_1070	263	.	2.81568	28.0458	26.3804	121
Chr1	1697394	1697549	Ara_M5_peak_1071	85	.	1.95073	9.86158	8.57336	120
Chr1	1701028	1701296	Ara_M5_peak_1072	978	.	5.04246	100.427	97.8959	181
Chr1	1702697	1703180	Ara_M5_peak_1073	390	.	3.29416	40.9197	39.0609	217
Chr1	1704664	1705383	Ara_M5_peak_1074	678	.	4.21432	70.0858	67.8662	250
Chr1	1706656	1707058	Ara_M5_peak_1075	476	.	3.58861	49.6675	47.6916	289
Chr1	1709077	1709615	Ara_M5_peak_1076	211	.	2.59484	22.7267	21.1529	144
Chr1	1713131	1713551	Ara_M5_peak_1077	1167	.	5.52094	119.453	116.755	233
Chr1	1713700	1713804	Ara_M5_peak_1078	29	.	1.52746	3.99205	2.93	80
Chr1	1714108	1714600	Ara_M5_peak_1079	493	.	3.64382	51.3722	49.3746	163
Chr1	1714847	1714968	Ara_M5_peak_1080	195	.	2.52123	21.0491	19.5063	40
Chr1	1715681	1715739	Ara_M5_peak_1081	25	.	1.49065	3.59647	2.55692	11
Chr1	1717116	1717234	Ara_M5_peak_1082	158	.	2.34317	17.2834	15.8174	46
Chr1	1717351	1717456	Ara_M5_peak_1083	31	.	1.54586	4.19719	3.12408	85
Chr1	1718883	1719054	Ara_M5_peak_1084	861	.	4.7296	88.5578	86.1418	59
Chr1	1721301	1721500	Ara_M5_peak_1085	841	.	4.67439	86.5129	84.1174	112
Chr1	1724475	1724588	Ara_M5_peak_1086	219	.	2.63165	23.5837	21.9945	76
Chr1	1724866	1725061	Ara_M5_peak_1087	79	.	1.91393	9.26123	7.99082	176
Chr1	1725268	1725622	Ara_M5_peak_1088	666	.	4.17751	68.821	66.6155	105
Chr1	1726202	1726373	Ara_M5_peak_1089	100	.	2.04275	11.4314	10.0998	126
Chr1	1726527	1726604	Ara_M5_peak_1090	334	.	3.09173	35.26	33.4822	32
Chr1	1729393	1729551	Ara_M5_peak_1091	127	.	2.18997	14.1398	12.7409	64
Chr1	1730038	1730161	Ara_M5_peak_1092	729	.	4.36154	75.2199	72.9438	79
Chr1	1731569	1731662	Ara_M5_peak_1093	39	.	1.61948	5.06578	3.94987	67
Chr1	1732751	1732846	Ara_M5_peak_1094	137	.	2.24518	15.2152	13.7917	64
Chr1	1737960	1738078	Ara_M5_peak_1095	156	.	2.3372	17.0769	15.613	36
Chr1	1739575	1739704	Ara_M5_peak_1096	422	.	3.40458	44.1307	42.2277	99
Chr1	1740233	1740344	Ara_M5_peak_1097	107	.	2.07955	12.0863	10.7376	73
Chr1	1743367	1743443	Ara_M5_peak_1098	407	.	3.30287	42.5874	40.706	51
Chr1	1743842	1744833	Ara_M5_peak_1099	911	.	4.78117	93.5795	91.1146	723
Chr1	1745488	1746246	Ara_M5_peak_1100	691	.	4.25112	71.3582	69.1243	468
Chr1	1746970	1747187	Ara_M5_peak_1101	417	.	3.36279	43.6337	41.7376	106
Chr1	1747515	1747709	Ara_M5_peak_1102	58	.	1.75833	7.0522	5.85572	26
Chr1	1747860	1748095	Ara_M5_peak_1103	105	.	2.05546	11.8675	10.5261	33
Chr1	1748250	1748319	Ara_M5_peak_1104	49	.	1.69663	6.15262	4.9932	42
Chr1	1749557	1749653	Ara_M5_peak_1105	58	.	1.7667	7.02448	5.82844	20
Chr1	1750950	1751068	Ara_M5_peak_1106	27	.	1.50906	3.79179	2.74092	3
Chr1	1753525	1753639	Ara_M5_peak_1107	68	.	1.84031	8.10934	6.8755	18
Chr1	1753871	1754268	Ara_M5_peak_1108	1086	.	5.3185	111.28	108.652	320
Chr1	1761835	1762231	Ara_M5_peak_1109	325	.	3.05492	34.2636	32.5006	321
Chr1	1762727	1762871	Ara_M5_peak_1110	53	.	1.72989	6.50795	5.33121	90
Chr1	1766317	1766822	Ara_M5_peak_1111	310	.	2.99971	32.7886	31.0481	110
Chr1	1768668	1769030	Ara_M5_peak_1112	465	.	3.5518	48.5421	46.5806	70
Chr1	1771458	1771617	Ara_M5_peak_1113	117	.	2.08936	13.0698	11.7006	110
Chr1	1773274	1774438	Ara_M5_peak_1114	2744	.	8.76096	277.876	274.424	728
Chr1	1774625	1774785	Ara_M5_peak_1115	70	.	1.82634	8.28384	7.04747	27
Chr1	1777760	1777920	Ara_M5_peak_1116	37	.	1.60107	4.84152	3.73613	128
Chr1	1778527	1778870	Ara_M5_peak_1117	113	.	2.11636	12.7561	11.3905	103
Chr1	1779230	1779510	Ara_M5_peak_1118	315	.	3.01811	33.2777	31.5296	110
Chr1	1781232	1781341	Ara_M5_peak_1119	50	.	1.71149	6.2563	5.08942	92
Chr1	1784521	1784654	Ara_M5_peak_1120	141	.	2.26358	15.5807	14.149	50
Chr1	1786231	1786764	Ara_M5_peak_1121	291	.	2.9261	30.8589	29.1483	82
Chr1	1787438	1787547	Ara_M5_peak_1122	63	.	1.80351	7.55838	6.3433	56
Chr1	1789000	1789105	Ara_M5_peak_1123	29	.	1.52746	3.99205	2.93	11
Chr1	1789602	1790195	Ara_M5_peak_1124	1021	.	5.15288	104.726	102.157	540
Chr1	1796790	1796878	Ara_M5_peak_1125	110	.	2.09796	12.4194	11.0622	48
Chr1	1798823	1799335	Ara_M5_peak_1126	888	.	4.80322	91.3079	88.8646	185
Chr1	1800585	1800664	Ara_M5_peak_1127	88	.	1.96913	10.1677	8.87068	34
Chr1	1801229	1801331	Ara_M5_peak_1128	60	.	1.7851	7.28928	6.0837	65
Chr1	1802862	1802968	Ara_M5_peak_1129	33	.	1.56427	4.40718	3.32319	90
Chr1	1803955	1804257	Ara_M5_peak_1130	755	.	4.43515	77.831	75.5264	98
Chr1	1807613	1808143	Ara_M5_peak_1131	1108	.	5.37371	113.491	110.844	125
Chr1	1811587	1811704	Ara_M5_peak_1132	97	.	2.02434	11.1097	9.78669	87
Chr1	1811922	1811980	Ara_M5_peak_1133	82	.	1.93233	9.5594	8.28007	27
Chr1	1815506	1815917	Ara_M5_peak_1134	1389	.	6.05463	141.824	138.948	102
Chr1	1816057	1816197	Ara_M5_peak_1135	39	.	1.61948	5.06578	3.94987	28
Chr1	1817264	1817391	Ara_M5_peak_1136	183	.	2.46602	19.8236	18.3043	70
Chr1	1817584	1817726	Ara_M5_peak_1137	97	.	1.99456	11.075	9.75698	53
Chr1	1818895	1819002	Ara_M5_peak_1138	28	.	1.50528	3.89402	2.84089	101
Chr1	1819650	1819728	Ara_M5_peak_1139	30	.	1.51458	4.08467	3.02065	34
Chr1	1819976	1820551	Ara_M5_peak_1140	616	.	3.89542	63.7716	61.6276	92
Chr1	1821843	1822634	Ara_M5_peak_1141	735	.	4.37994	75.87	73.5868	667
Chr1	1823952	1824217	Ara_M5_peak_1142	156	.	2.3372	17.0769	15.613	16
Chr1	1824356	1824506	Ara_M5_peak_1143	237	.	2.70526	25.3337	23.7139	63
Chr1	1826244	1826419	Ara_M5_peak_1144	29	.	1.52746	3.99205	2.93	26
Chr1	1828114	1828643	Ara_M5_peak_1145	167	.	2.39241	18.2344	16.7466	485
Chr1	1829782	1830589	Ara_M5_peak_1146	703	.	4.28793	72.638	70.3901	550
Chr1	1832407	1832588	Ara_M5_peak_1147	268	.	2.83408	28.5078	26.8348	132
Chr1	1834933	1835081	Ara_M5_peak_1148	50	.	1.68871	6.17313	5.01336	24
Chr1	1837583	1838965	Ara_M5_peak_1149	1064	.	5.26329	109.081	106.473	558
Chr1	1839693	1839848	Ara_M5_peak_1150	349	.	3.14693	36.7736	34.9737	114
Chr1	1840949	1841105	Ara_M5_peak_1151	199	.	2.53003	21.4631	19.9133	117
Chr1	1841617	1841812	Ara_M5_peak_1152	171	.	2.39378	18.6372	17.1415	19
Chr1	1842664	1842725	Ara_M5_peak_1153	162	.	2.36499	17.717	16.2426	24
Chr1	1845351	1845585	Ara_M5_peak_1154	774	.	4.49036	79.8082	77.4825	116
Chr1	1852212	1852309	Ara_M5_peak_1155	39	.	1.61948	5.06578	3.94987	12
Chr1	1855021	1855378	Ara_M5_peak_1156	723	.	4.34314	74.5717	72.3026	80
Chr1	1855533	1855683	Ara_M5_peak_1157	137	.	2.24518	15.2152	13.7917	105
Chr1	1855810	1855868	Ara_M5_peak_1158	91	.	1.98754	10.4778	9.17206	43
Chr1	1857604	1857674	Ara_M5_peak_1159	167	.	2.39241	18.2344	16.7466	43
Chr1	1857966	1858079	Ara_M5_peak_1160	94	.	2.00594	10.7919	9.47742	44
Chr1	1860679	1861223	Ara_M5_peak_1161	761	.	4.45356	78.4883	76.1767	122
Chr1	1861527	1861585	Ara_M5_peak_1162	71	.	1.85872	8.39112	7.14807	42
Chr1	1861780	1862224	Ara_M5_peak_1163	2066	.	7.54528	209.904	206.643	329
Chr1	1863822	1864078	Ara_M5_peak_1164	58	.	1.7667	7.02448	5.82844	10
Chr1	1864585	1864692	Ara_M5_peak_1165	37	.	1.60107	4.84152	3.73613	7
Chr1	1867066	1867165	Ara_M5_peak_1166	37	.	1.60107	4.84152	3.73613	76
Chr1	1868864	1869180	Ara_M5_peak_1167	1296	.	5.83379	132.427	129.622	104
Chr1	1869357	1869416	Ara_M5_peak_1168	91	.	1.98754	10.4778	9.17206	19
Chr1	1873703	1874308	Ara_M5_peak_1169	195	.	2.52123	21.0491	19.5063	38
Chr1	1874457	1874824	Ara_M5_peak_1170	354	.	3.12751	37.2543	35.4509	245
Chr1	1875140	1875284	Ara_M5_peak_1171	45	.	1.64425	5.69317	4.55344	108
Chr1	1877531	1877974	Ara_M5_peak_1172	1319	.	5.07935	134.758	131.934	348
Chr1	1878282	1878894	Ara_M5_peak_1173	107	.	1.91191	12.1225	10.7734	338
Chr1	1879223	1879691	Ara_M5_peak_1174	645	.	3.6244	66.751	64.5717	402
Chr1	1880056	1880254	Ara_M5_peak_1175	168	.	2.17135	18.3565	16.8675	40
Chr1	1880482	1880979	Ara_M5_peak_1176	1221	.	4.79502	124.922	122.178	389
Chr1	1881181	1881355	Ara_M5_peak_1177	132	.	2.01539	14.6542	13.2454	40
Chr1	1882587	1883033	Ara_M5_peak_1178	567	.	3.36756	58.8742	56.7874	267
Chr1	1884482	1884548	Ara_M5_peak_1179	58	.	1.62745	7.02338	5.82844	33
Chr1	1884715	1884958	Ara_M5_peak_1180	665	.	3.5644	68.7149	66.5136	142
Chr1	1887443	1887587	Ara_M5_peak_1181	564	.	3.34404	58.5406	56.4559	102
Chr1	1887798	1888537	Ara_M5_peak_1182	717	.	3.8401	74.0447	71.782	682
Chr1	1888733	1889439	Ara_M5_peak_1183	386	.	2.87831	40.5206	38.6681	673
Chr1	1889624	1889734	Ara_M5_peak_1184	89	.	1.81287	10.2104	8.91281	85
Chr1	1890240	1890533	Ara_M5_peak_1185	284	.	2.60332	30.1688	28.4713	227
Chr1	1890996	1891238	Ara_M5_peak_1186	601	.	3.50563	62.3195	60.1912	152
Chr1	1892154	1892272	Ara_M5_peak_1187	52	.	1.61179	6.40711	5.23771	72
Chr1	1894121	1894586	Ara_M5_peak_1188	1930	.	6.83159	196.211	193.008	255
Chr1	1894770	1894954	Ara_M5_peak_1189	123	.	2.08337	13.7429	12.3572	109
Chr1	1896945	1897219	Ara_M5_peak_1190	209	.	2.57458	22.5678	20.9994	178
Chr1	1898517	1898650	Ara_M5_peak_1191	137	.	2.24518	15.2152	13.7917	13
Chr1	1899165	1899656	Ara_M5_peak_1192	127	.	2.18997	14.1398	12.7409	448
Chr1	1899776	1900029	Ara_M5_peak_1193	2013	.	7.43486	204.604	201.364	103
Chr1	1904632	1904708	Ara_M5_peak_1194	27	.	1.50906	3.79179	2.74092	27
Chr1	1904837	1904954	Ara_M5_peak_1195	29	.	1.52746	3.99205	2.93	106
Chr1	1905188	1905431	Ara_M5_peak_1196	110	.	2.09796	12.4194	11.0622	30
Chr1	1905781	1906014	Ara_M5_peak_1197	100	.	2.04275	11.4314	10.0998	146
Chr1	1906952	1907097	Ara_M5_peak_1198	296	.	2.9445	31.3374	29.6192	101
Chr1	1910292	1910352	Ara_M5_peak_1199	113	.	2.11636	12.7561	11.3905	20
Chr1	1910617	1910675	Ara_M5_peak_1200	50	.	1.71149	6.2563	5.08942	14
Chr1	1910837	1911139	Ara_M5_peak_1201	616	.	4.03028	63.8384	61.6905	216
Chr1	1914923	1914996	Ara_M5_peak_1202	71	.	1.85872	8.39112	7.14807	46
Chr1	1919764	1920027	Ara_M5_peak_1203	433	.	3.44139	45.2198	43.3022	36
Chr1	1921085	1921200	Ara_M5_peak_1204	60	.	1.7851	7.28928	6.0837	87
Chr1	1921487	1922369	Ara_M5_peak_1205	460	.	3.5334	47.9827	46.0285	723
Chr1	1922965	1923115	Ara_M5_peak_1206	33	.	1.56427	4.40718	3.32319	138
Chr1	1926048	1926252	Ara_M5_peak_1207	339	.	3.11013	35.762	33.9768	26
Chr1	1926450	1926695	Ara_M5_peak_1208	1789	.	6.95638	182.094	178.963	107
Chr1	1930342	1930520	Ara_M5_peak_1209	735	.	4.37994	75.87	73.5868	80
Chr1	1932450	1932662	Ara_M5_peak_1210	460	.	3.5334	47.9827	46.0285	41
Chr1	1933009	1933543	Ara_M5_peak_1211	1943	.	7.28764	197.598	194.389	205
Chr1	1934388	1934660	Ara_M5_peak_1212	53	.	1.72989	6.50795	5.33121	114
Chr1	1934806	1934953	Ara_M5_peak_1213	66	.	1.82191	7.83174	6.60726	28
Chr1	1937112	1937260	Ara_M5_peak_1214	22	.	1.45165	3.26028	2.24278	130
Chr1	1938537	1938861	Ara_M5_peak_1215	137	.	2.24518	15.2152	13.7917	125
Chr1	1940432	1940776	Ara_M5_peak_1216	130	.	2.20838	14.4948	13.0877	198
Chr1	1941205	1941433	Ara_M5_peak_1217	943	.	4.95044	96.8873	94.3902	193
Chr1	1941586	1941833	Ara_M5_peak_1218	374	.	3.2217	39.2657	37.4333	127
Chr1	1941972	1942430	Ara_M5_peak_1219	151	.	2.30626	16.6406	15.1895	311
Chr1	1942732	1943304	Ara_M5_peak_1220	382	.	3.23363	40.1003	38.2545	285
Chr1	1944452	1944535	Ara_M5_peak_1221	33	.	1.56634	4.46658	3.38136	31
Chr1	1946052	1946328	Ara_M5_peak_1222	295	.	2.92031	31.3092	29.5951	224
Chr1	1946460	1946868	Ara_M5_peak_1223	385	.	3.27576	40.3929	38.5413	250
Chr1	1950499	1950971	Ara_M5_peak_1224	236	.	2.66217	25.2893	23.6737	192
Chr1	1951529	1951631	Ara_M5_peak_1225	31	.	1.54586	4.19719	3.12408	9
Chr1	1952712	1952823	Ara_M5_peak_1226	141	.	2.26358	15.5807	14.149	83
Chr1	1953090	1953726	Ara_M5_peak_1227	334	.	3.09173	35.26	33.4822	485
Chr1	1953950	1954447	Ara_M5_peak_1228	204	.	2.54975	22.0459	20.4861	327
Chr1	1954618	1954817	Ara_M5_peak_1229	2138	.	7.67267	217.12	213.834	85
Chr1	1958517	1958977	Ara_M5_peak_1230	1064	.	5.26329	109.081	106.473	255
Chr1	1959748	1959916	Ara_M5_peak_1231	74	.	1.87712	8.67705	7.42486	82
Chr1	1960045	1960182	Ara_M5_peak_1232	97	.	2.02434	11.1097	9.78669	113
Chr1	1963022	1963173	Ara_M5_peak_1233	145	.	2.28199	15.9496	14.5099	55
Chr1	1963335	1963503	Ara_M5_peak_1234	48	.	1.69309	6.0091	4.85215	63
Chr1	1964865	1965307	Ara_M5_peak_1235	277	.	2.87089	29.44	27.752	154
Chr1	1965652	1965880	Ara_M5_peak_1236	148	.	2.30039	16.322	14.8742	193
Chr1	1966802	1967343	Ara_M5_peak_1237	315	.	3.01811	33.2777	31.5296	347
Chr1	1969524	1969761	Ara_M5_peak_1238	37	.	1.60107	4.84152	3.73613	137
Chr1	1972906	1973023	Ara_M5_peak_1239	53	.	1.72989	6.50795	5.33121	22
Chr1	1973569	1973954	Ara_M5_peak_1240	266	.	2.80044	28.3135	26.646	343
Chr1	1974301	1975035	Ara_M5_peak_1241	508	.	3.62868	52.8281	50.8141	272
Chr1	1977202	1977776	Ara_M5_peak_1242	880	.	4.75918	90.4617	88.0294	203
Chr1	1977893	1978358	Ara_M5_peak_1243	1420	.	6.12824	144.999	142.1	342
Chr1	1979343	1979452	Ara_M5_peak_1244	79	.	1.91393	9.26123	7.99082	26
Chr1	1983925	1984028	Ara_M5_peak_1245	17	.	1.39864	2.69537	1.71459	92
Chr1	1989150	1989525	Ara_M5_peak_1246	1789	.	6.95638	182.094	178.963	198
Chr1	1990630	1990737	Ara_M5_peak_1247	60	.	1.7851	7.28928	6.0837	64
Chr1	1992134	1992376	Ara_M5_peak_1248	385	.	3.27576	40.3929	38.5413	141
Chr1	1993687	1994099	Ara_M5_peak_1249	203	.	2.55803	21.8817	20.3234	373
Chr1	1996458	1996550	Ara_M5_peak_1250	361	.	3.15651	37.9507	36.135	45
Chr1	1997020	1997136	Ara_M5_peak_1251	73	.	1.86622	8.54947	7.30416	15
Chr1	1998217	1998449	Ara_M5_peak_1252	152	.	2.31879	16.6977	15.2419	28
Chr1	1998623	1998771	Ara_M5_peak_1253	141	.	2.26358	15.5807	14.149	40
Chr1	1999296	1999359	Ara_M5_peak_1254	141	.	2.26358	15.5807	14.149	14
Chr1	1999557	1999671	Ara_M5_peak_1255	39	.	1.61948	5.06578	3.94987	17
Chr1	2000396	2001467	Ara_M5_peak_1256	1093	.	5.33691	112.015	109.381	356
Chr1	2003692	2003812	Ara_M5_peak_1257	236	.	2.57253	25.3145	23.6987	65
Chr1	2007030	2007648	Ara_M5_peak_1258	2020	.	7.41886	205.26	202.018	245
Chr1	2013485	2013828	Ara_M5_peak_1259	263	.	2.81568	28.0458	26.3804	255
Chr1	2013967	2014201	Ara_M5_peak_1260	127	.	2.18997	14.1398	12.7409	114
Chr1	2014364	2014712	Ara_M5_peak_1261	88	.	1.96913	10.1677	8.87068	231
Chr1	2016095	2016609	Ara_M5_peak_1262	145	.	2.28199	15.9496	14.5099	101
Chr1	2016751	2016910	Ara_M5_peak_1263	82	.	1.93233	9.5594	8.28007	116
Chr1	2024664	2024865	Ara_M5_peak_1264	1108	.	5.37371	113.491	110.844	128
Chr1	2025067	2025325	Ara_M5_peak_1265	460	.	3.5334	47.9827	46.0285	147
Chr1	2025457	2025567	Ara_M5_peak_1266	148	.	2.30039	16.322	14.8742	96
Chr1	2026166	2026400	Ara_M5_peak_1267	104	.	2.06115	11.757	10.4168	80
Chr1	2027059	2027331	Ara_M5_peak_1268	182	.	2.41919	19.7902	18.2752	237
Chr1	2027576	2027762	Ara_M5_peak_1269	1296	.	5.66008	132.473	129.667	66
Chr1	2029721	2029968	Ara_M5_peak_1270	417	.	3.31618	43.6942	41.7977	50
Chr1	2031998	2032328	Ara_M5_peak_1271	957	.	4.98725	98.2983	95.7875	155
Chr1	2033808	2034207	Ara_M5_peak_1272	411	.	3.36777	43.0509	41.1625	278
Chr1	2035484	2035854	Ara_M5_peak_1273	993	.	5.07926	101.854	99.3099	97
Chr1	2038105	2038200	Ara_M5_peak_1274	27	.	1.50906	3.79179	2.74092	9
Chr1	2039132	2039226	Ara_M5_peak_1275	33	.	1.56427	4.40718	3.32319	51
Chr1	2040293	2040384	Ara_M5_peak_1276	107	.	2.07955	12.0863	10.7376	60
Chr1	2047414	2047904	Ara_M5_peak_1277	449	.	3.49659	46.8708	44.9312	232
Chr1	2049290	2049734	Ara_M5_peak_1278	259	.	2.79728	27.5867	25.9289	325
Chr1	2049961	2050061	Ara_M5_peak_1279	63	.	1.80351	7.55838	6.3433	32
Chr1	2050296	2050425	Ara_M5_peak_1280	23	.	1.47225	3.40612	2.37797	4
Chr1	2052097	2052676	Ara_M5_peak_1281	403	.	3.24615	42.2229	40.3477	140
Chr1	2052844	2052954	Ara_M5_peak_1282	84	.	1.94085	9.74143	8.45964	70
Chr1	2055230	2055396	Ara_M5_peak_1283	349	.	3.14693	36.7736	34.9737	89
Chr1	2055520	2056240	Ara_M5_peak_1284	1655	.	6.66193	168.623	165.57	457
Chr1	2056390	2056519	Ara_M5_peak_1285	29	.	1.52746	3.99205	2.93	14
Chr1	2060557	2060693	Ara_M5_peak_1286	63	.	1.80351	7.55838	6.3433	96
Chr1	2067312	2067517	Ara_M5_peak_1287	703	.	4.28793	72.638	70.3901	82
Chr1	2070231	2070764	Ara_M5_peak_1288	909	.	4.85843	93.3879	90.924	402
Chr1	2076485	2076603	Ara_M5_peak_1289	79	.	1.91393	9.26123	7.99082	12
Chr1	2077664	2077924	Ara_M5_peak_1290	874	.	4.76641	89.9296	87.4998	101
Chr1	2078583	2078839	Ara_M5_peak_1291	85	.	1.95073	9.86158	8.57336	115
Chr1	2081872	2082043	Ara_M5_peak_1292	241	.	2.72366	25.7786	24.1511	72
Chr1	2082290	2082499	Ara_M5_peak_1293	179	.	2.42324	19.4594	17.9476	113
Chr1	2082700	2083435	Ara_M5_peak_1294	735	.	4.37994	75.87	73.5868	554
Chr1	2086254	2086409	Ara_M5_peak_1295	118	.	2.13976	13.2631	11.8872	48
Chr1	2086939	2087260	Ara_M5_peak_1296	641	.	4.1039	66.3142	64.1375	224
Chr1	2088605	2088714	Ara_M5_peak_1297	113	.	2.11636	12.7561	11.3905	83
Chr1	2089625	2090236	Ara_M5_peak_1298	228	.	2.66845	24.4528	22.8483	113
Chr1	2091443	2091597	Ara_M5_peak_1299	187	.	2.48442	20.2289	18.7018	112
Chr1	2092208	2092323	Ara_M5_peak_1300	82	.	1.93233	9.5594	8.28007	85
Chr1	2092532	2092932	Ara_M5_peak_1301	254	.	2.77887	27.1304	25.4801	218
Chr1	2096257	2096432	Ara_M5_peak_1302	454	.	3.515	47.4256	45.4787	83
Chr1	2096883	2097132	Ara_M5_peak_1303	130	.	2.20838	14.4948	13.0877	182
Chr1	2097543	2097701	Ara_M5_peak_1304	50	.	1.71149	6.2563	5.08942	29
Chr1	2103302	2105142	Ara_M5_peak_1305	1639	.	6.62513	166.961	163.917	1210
Chr1	2106631	2106697	Ara_M5_peak_1306	19	.	1.41303	2.96003	1.96475	62
Chr1	2107484	2107593	Ara_M5_peak_1307	39	.	1.59134	5.04416	3.93484	89
Chr1	2107937	2108265	Ara_M5_peak_1308	1301	.	5.57126	132.933	130.125	131
Chr1	2108487	2108616	Ara_M5_peak_1309	245	.	2.6682	26.1651	24.5344	93
Chr1	2110083	2110188	Ara_M5_peak_1310	33	.	1.56427	4.40718	3.32319	26
Chr1	2110473	2110602	Ara_M5_peak_1311	50	.	1.71149	6.2563	5.08942	21
Chr1	2110923	2111084	Ara_M5_peak_1312	110	.	2.09796	12.4194	11.0622	45
Chr1	2111326	2111695	Ara_M5_peak_1313	88	.	1.96913	10.1677	8.87068	197
Chr1	2111860	2112007	Ara_M5_peak_1314	120	.	2.15317	13.4407	12.0584	80
Chr1	2114548	2114813	Ara_M5_peak_1315	604	.	3.99348	62.6123	60.4788	141
Chr1	2115037	2115196	Ara_M5_peak_1316	53	.	1.72989	6.50795	5.33121	79
Chr1	2120727	2120914	Ara_M5_peak_1317	827	.	4.63759	85.1581	82.7763	83
Chr1	2123104	2123345	Ara_M5_peak_1318	50	.	1.71149	6.2563	5.08942	126
Chr1	2123831	2124274	Ara_M5_peak_1319	2227	.	7.87654	226.028	222.711	135
Chr1	2124404	2124721	Ara_M5_peak_1320	55	.	1.7483	6.76402	5.57757	43
Chr1	2125887	2126019	Ara_M5_peak_1321	211	.	2.58518	22.7288	21.155	41
Chr1	2126270	2126444	Ara_M5_peak_1322	313	.	3.00794	33.1118	31.3688	98
Chr1	2127958	2128448	Ara_M5_peak_1323	1000	.	5.09767	102.57	100.019	330
Chr1	2129035	2129097	Ara_M5_peak_1324	29	.	1.52746	3.99205	2.93	6
Chr1	2129827	2130179	Ara_M5_peak_1325	493	.	3.64382	51.3722	49.3746	260
Chr1	2130307	2130443	Ara_M5_peak_1326	58	.	1.7667	7.02448	5.82844	22
Chr1	2135637	2136022	Ara_M5_peak_1327	821	.	4.61918	84.4833	82.1084	134
Chr1	2136675	2136857	Ara_M5_peak_1328	58	.	1.7667	7.02448	5.82844	31
Chr1	2137741	2137886	Ara_M5_peak_1329	127	.	2.18997	14.1398	12.7409	44
Chr1	2140892	2142243	Ara_M5_peak_1330	964	.	5.00565	99.0062	96.4888	1167
Chr1	2142378	2142758	Ara_M5_peak_1331	328	.	3.05466	34.6474	32.8815	351
Chr1	2143796	2144112	Ara_M5_peak_1332	1406	.	5.76678	143.558	140.671	114
Chr1	2144284	2144506	Ara_M5_peak_1333	439	.	3.30256	45.8384	43.913	57
Chr1	2145572	2145696	Ara_M5_peak_1334	31	.	1.50355	4.2145	3.14105	95
Chr1	2147659	2147765	Ara_M5_peak_1335	77	.	1.88589	8.99992	7.73813	19
Chr1	2148101	2148477	Ara_M5_peak_1336	1720	.	6.62563	175.125	172.035	163
Chr1	2149592	2149709	Ara_M5_peak_1337	53	.	1.72989	6.50795	5.33121	96
Chr1	2150055	2150200	Ara_M5_peak_1338	175	.	2.42921	19.0225	17.5189	18
Chr1	2151675	2151734	Ara_M5_peak_1339	87	.	1.9483	9.99215	8.70219	6
Chr1	2152325	2152954	Ara_M5_peak_1340	580	.	3.91987	60.1841	58.0789	389
Chr1	2155049	2155319	Ara_M5_peak_1341	148	.	2.30039	16.322	14.8742	34
Chr1	2155967	2156161	Ara_M5_peak_1342	1334	.	5.92581	136.319	133.484	131
Chr1	2158437	2158502	Ara_M5_peak_1343	110	.	2.09796	12.4194	11.0622	28
Chr1	2160837	2161155	Ara_M5_peak_1344	132	.	2.11989	14.6733	13.2642	38
Chr1	2163118	2164529	Ara_M5_peak_1345	1452	.	5.38599	148.148	145.228	475
Chr1	2165157	2165499	Ara_M5_peak_1346	382	.	2.90185	40.1422	38.2961	119
Chr1	2165770	2165866	Ara_M5_peak_1347	144	.	2.0868	15.8771	14.4424	68
Chr1	2166028	2166266	Ara_M5_peak_1348	788	.	3.98348	81.1845	78.8445	112
Chr1	2168365	2168577	Ara_M5_peak_1349	2331	.	6.46594	236.474	233.124	92
Chr1	2169893	2170018	Ara_M5_peak_1350	351	.	2.8864	36.9708	35.1694	56
Chr1	2171960	2172828	Ara_M5_peak_1351	1098	.	4.69842	112.438	109.803	693
Chr1	2173047	2173304	Ara_M5_peak_1352	50	.	1.61363	6.25412	5.08942	3
Chr1	2174908	2175249	Ara_M5_peak_1353	289	.	2.72351	30.6221	28.9171	242
Chr1	2176247	2176997	Ara_M5_peak_1354	463	.	3.26181	48.2634	46.3073	320
Chr1	2177439	2177867	Ara_M5_peak_1355	458	.	3.38085	47.7587	45.8096	58
Chr1	2178021	2178161	Ara_M5_peak_1356	104	.	2.06115	11.757	10.4168	107
Chr1	2178362	2178524	Ara_M5_peak_1357	224	.	2.65005	24.0168	22.4199	116
Chr1	2184069	2184378	Ara_M5_peak_1358	1130	.	5.42892	115.716	113.05	194
Chr1	2187668	2187887	Ara_M5_peak_1359	137	.	2.24518	15.2152	13.7917	185
Chr1	2188489	2188738	Ara_M5_peak_1360	416	.	3.38618	43.5897	41.6939	35
Chr1	2189982	2190248	Ara_M5_peak_1361	1344	.	5.81146	137.248	134.407	109
Chr1	2190596	2190813	Ara_M5_peak_1362	294	.	2.92491	31.203	29.4897	106
Chr1	2191031	2191195	Ara_M5_peak_1363	775	.	4.39543	79.8589	77.5328	124
Chr1	2191757	2191904	Ara_M5_peak_1364	131	.	2.15848	14.5379	13.1303	30
Chr1	2192197	2192342	Ara_M5_peak_1365	114	.	2.05266	12.8348	11.4683	107
Chr1	2193760	2194130	Ara_M5_peak_1366	1141	.	5.06007	116.804	114.13	78
Chr1	2194320	2194736	Ara_M5_peak_1367	308	.	2.83104	32.5941	30.8588	340
Chr1	2195763	2196054	Ara_M5_peak_1368	218	.	2.52835	23.4214	21.8374	197
Chr1	2196578	2196935	Ara_M5_peak_1369	850	.	4.49247	87.423	85.0196	310
Chr1	2197063	2197159	Ara_M5_peak_1370	37	.	1.57388	4.8634	3.75759	23
Chr1	2197310	2197996	Ara_M5_peak_1371	399	.	3.21181	41.8119	39.9432	286
Chr1	2200000	2200139	Ara_M5_peak_1372	458	.	3.30162	47.773	45.8238	47
Chr1	2201399	2201756	Ara_M5_peak_1373	355	.	2.99257	37.373	35.5651	270
Chr1	2203257	2204352	Ara_M5_peak_1374	2778	.	8.81613	281.324	277.866	545
Chr1	2204900	2205142	Ara_M5_peak_1375	148	.	2.30039	16.322	14.8742	203
Chr1	2212377	2212793	Ara_M5_peak_1376	1499	.	6.28593	152.924	149.972	298
Chr1	2213152	2213547	Ara_M5_peak_1377	1223	.	5.64665	125.079	122.335	242
Chr1	2213862	2214727	Ara_M5_peak_1378	710	.	4.30633	73.2807	71.0258	456
Chr1	2214903	2215233	Ara_M5_peak_1379	1182	.	5.38825	120.966	118.255	233
Chr1	2215929	2215995	Ara_M5_peak_1380	19	.	1.39661	2.89398	1.9004	53
Chr1	2219477	2219758	Ara_M5_peak_1381	510	.	3.69903	53.0965	51.0772	213
Chr1	2220014	2220576	Ara_M5_peak_1382	499	.	3.66222	51.9448	49.94	453
Chr1	2222861	2223433	Ara_M5_peak_1383	395	.	3.31256	41.449	39.5828	350
Chr1	2223578	2223871	Ara_M5_peak_1384	219	.	2.63165	23.5837	21.9945	204
Chr1	2224491	2224710	Ara_M5_peak_1385	263	.	2.81568	28.0458	26.3804	145
Chr1	2224959	2225827	Ara_M5_peak_1386	263	.	2.81568	28.0458	26.3804	299
Chr1	2227448	2227784	Ara_M5_peak_1387	250	.	2.76047	26.6769	25.0342	252
Chr1	2229267	2229378	Ara_M5_peak_1388	79	.	1.91393	9.26123	7.99082	21
Chr1	2229496	2229712	Ara_M5_peak_1389	82	.	1.93233	9.5594	8.28007	30
Chr1	2233035	2233759	Ara_M5_peak_1390	358	.	3.17673	37.6782	35.868	124
Chr1	2235176	2235550	Ara_M5_peak_1391	134	.	2.22678	14.8532	13.4379	95
Chr1	2235750	2235946	Ara_M5_peak_1392	315	.	3.01811	33.2777	31.5296	146
Chr1	2236180	2236512	Ara_M5_peak_1393	186	.	2.47438	20.2178	18.6948	201
Chr1	2236673	2237012	Ara_M5_peak_1394	333	.	3.02713	35.147	33.3737	273
Chr1	2237539	2238093	Ara_M5_peak_1395	824	.	4.50497	84.8315	82.4548	186
Chr1	2239899	2240680	Ara_M5_peak_1396	216	.	2.53317	23.2164	21.6343	278
Chr1	2241021	2241940	Ara_M5_peak_1397	272	.	2.78801	28.9537	27.2772	232
Chr1	2244918	2245265	Ara_M5_peak_1398	1151	.	5.47963	117.865	115.184	114
Chr1	2245639	2245863	Ara_M5_peak_1399	141	.	2.26358	15.5807	14.149	57
Chr1	2246456	2246634	Ara_M5_peak_1400	71	.	1.85872	8.39112	7.14807	38
Chr1	2246772	2246983	Ara_M5_peak_1401	43	.	1.65628	5.52827	4.39152	26
Chr1	2248887	2249152	Ara_M5_peak_1402	1823	.	7.02999	185.508	182.359	129
Chr1	2250450	2251066	Ara_M5_peak_1403	616	.	4.03028	63.8384	61.6905	219
Chr1	2260119	2260415	Ara_M5_peak_1404	300	.	2.9629	31.8185	30.0928	41
Chr1	2261546	2261641	Ara_M5_peak_1405	25	.	1.49065	3.59647	2.55692	83
Chr1	2262829	2263185	Ara_M5_peak_1406	710	.	4.30633	73.2807	71.0258	109
Chr1	2265741	2265809	Ara_M5_peak_1407	27	.	1.50906	3.79179	2.74092	17
Chr1	2266162	2266545	Ara_M5_peak_1408	137	.	2.24518	15.2152	13.7917	92
Chr1	2266671	2266757	Ara_M5_peak_1409	35	.	1.58267	4.62197	3.52719	79
Chr1	2268746	2268810	Ara_M5_peak_1410	68	.	1.84031	8.10934	6.8755	51
Chr1	2269052	2269252	Ara_M5_peak_1411	1273	.	5.77858	130.108	127.321	136
Chr1	2269438	2269688	Ara_M5_peak_1412	199	.	2.53963	21.4638	19.9133	62
Chr1	2269990	2270490	Ara_M5_peak_1413	533	.	3.77264	55.4256	53.3775	308
Chr1	2274240	2274354	Ara_M5_peak_1414	37	.	1.60107	4.84152	3.73613	99
Chr1	2274547	2274929	Ara_M5_peak_1415	1705	.	6.77235	173.639	170.556	256
Chr1	2275598	2275728	Ara_M5_peak_1416	159	.	2.3556	17.4594	15.9876	78
Chr1	2275949	2276059	Ara_M5_peak_1417	97	.	2.02434	11.1097	9.78669	90
Chr1	2277433	2277861	Ara_M5_peak_1418	551	.	3.82785	57.1945	55.1251	231
Chr1	2280091	2280920	Ara_M5_peak_1419	543	.	3.622	56.3885	54.3311	462
Chr1	2282771	2283207	Ara_M5_peak_1420	566	.	3.7025	58.7115	56.6258	287
Chr1	2283963	2284548	Ara_M5_peak_1421	346	.	3.0024	36.423	34.6292	470
Chr1	2285056	2285459	Ara_M5_peak_1422	540	.	3.67259	56.1258	54.07	244
Chr1	2285623	2285764	Ara_M5_peak_1423	113	.	2.10739	12.7361	11.3753	24
Chr1	2286044	2286504	Ara_M5_peak_1424	112	.	2.09613	12.5876	11.2285	410
Chr1	2287716	2288084	Ara_M5_peak_1425	91	.	1.98754	10.4778	9.17206	334
Chr1	2288385	2288513	Ara_M5_peak_1426	107	.	2.07955	12.0863	10.7376	91
Chr1	2290976	2291471	Ara_M5_peak_1427	241	.	2.72366	25.7786	24.1511	438
Chr1	2294411	2294695	Ara_M5_peak_1428	211	.	2.59484	22.7267	21.1529	185
Chr1	2295407	2295607	Ara_M5_peak_1429	82	.	1.93233	9.5594	8.28007	173
Chr1	2299499	2299913	Ara_M5_peak_1430	1987	.	7.37965	201.969	198.74	339
Chr1	2300163	2301340	Ara_M5_peak_1431	571	.	3.76845	59.2216	57.1292	340
Chr1	2301978	2302206	Ara_M5_peak_1432	538	.	3.67627	55.9455	53.8943	125
Chr1	2302674	2303087	Ara_M5_peak_1433	668	.	4.08373	69.0677	66.8608	56
Chr1	2303280	2303386	Ara_M5_peak_1434	56	.	1.72752	6.82139	5.63401	30
Chr1	2304635	2304732	Ara_M5_peak_1435	26	.	1.47272	3.68722	2.6456	10
Chr1	2305089	2305470	Ara_M5_peak_1436	927	.	4.83016	95.226	92.7468	218
Chr1	2309453	2309579	Ara_M5_peak_1437	58	.	1.7667	7.02448	5.82844	11
Chr1	2309718	2309796	Ara_M5_peak_1438	94	.	2.00594	10.7919	9.47742	35
Chr1	2312187	2313719	Ara_M5_peak_1439	2075	.	7.56369	210.79	207.527	906
Chr1	2316358	2316620	Ara_M5_peak_1440	694	.	4.23428	71.6377	69.4023	165
Chr1	2317397	2317639	Ara_M5_peak_1441	184	.	2.46843	19.9943	18.4734	48
Chr1	2317799	2318234	Ara_M5_peak_1442	141	.	2.26358	15.5807	14.149	339
Chr1	2318360	2318418	Ara_M5_peak_1443	104	.	2.06115	11.757	10.4168	31
Chr1	2321631	2321747	Ara_M5_peak_1444	195	.	2.52123	21.0491	19.5063	63
Chr1	2321896	2321985	Ara_M5_peak_1445	163	.	2.374	17.8452	16.3654	54
Chr1	2322344	2322739	Ara_M5_peak_1446	476	.	3.58861	49.6675	47.6916	200
Chr1	2322962	2323113	Ara_M5_peak_1447	23	.	1.47225	3.40612	2.37797	118
Chr1	2325547	2325836	Ara_M5_peak_1448	175	.	2.42921	19.0225	17.5189	251
Chr1	2326820	2326930	Ara_M5_peak_1449	94	.	2.00594	10.7919	9.47742	64
Chr1	2327091	2327189	Ara_M5_peak_1450	88	.	1.96913	10.1677	8.87068	52
Chr1	2333415	2333930	Ara_M5_peak_1451	388	.	3.22026	40.7083	38.8546	389
Chr1	2334103	2334600	Ara_M5_peak_1452	1031	.	5.00702	105.734	103.157	225
Chr1	2335517	2335734	Ara_M5_peak_1453	254	.	2.64011	27.0808	25.4349	53
Chr1	2335918	2336242	Ara_M5_peak_1454	636	.	3.82492	65.8131	63.6429	220
Chr1	2336401	2336476	Ara_M5_peak_1455	60	.	1.71698	7.19909	6.00031	44
Chr1	2337259	2337380	Ara_M5_peak_1456	75	.	1.801	8.81317	7.55905	22
Chr1	2338459	2338811	Ara_M5_peak_1457	1653	.	6.04372	168.446	165.395	54
Chr1	2339037	2339217	Ara_M5_peak_1458	85	.	1.891	9.87345	8.58506	146
Chr1	2339384	2340012	Ara_M5_peak_1459	1025	.	4.97771	105.127	102.556	83
Chr1	2340881	2340990	Ara_M5_peak_1460	41	.	1.63504	5.31328	4.18657	16
Chr1	2341369	2341522	Ara_M5_peak_1461	79	.	1.91393	9.26123	7.99082	119
Chr1	2341990	2342262	Ara_M5_peak_1462	97	.	2.02434	11.1097	9.78669	127
Chr1	2344329	2344463	Ara_M5_peak_1463	583	.	3.8737	60.4147	58.3082	46
Chr1	2346538	2346693	Ara_M5_peak_1464	43	.	1.65628	5.52827	4.39152	113
Chr1	2346816	2347093	Ara_M5_peak_1465	545	.	3.80945	56.6028	54.5405	41
Chr1	2347403	2349080	Ara_M5_peak_1466	895	.	4.82162	91.9996	89.5494	871
Chr1	2351476	2352178	Ara_M5_peak_1467	123	.	2.17157	13.7885	12.3979	630
Chr1	2352371	2352604	Ara_M5_peak_1468	66	.	1.82191	7.83174	6.60726	117
Chr1	2353492	2353624	Ara_M5_peak_1469	77	.	1.89552	8.9671	7.70575	45
Chr1	2356358	2356515	Ara_M5_peak_1470	55	.	1.7483	6.76402	5.57757	38
Chr1	2357812	2357993	Ara_M5_peak_1471	63	.	1.80351	7.55838	6.3433	7
Chr1	2358430	2358557	Ara_M5_peak_1472	100	.	2.04275	11.4314	10.0998	110
Chr1	2358815	2359396	Ara_M5_peak_1473	245	.	2.74207	26.2263	24.5912	140
Chr1	2359587	2359718	Ara_M5_peak_1474	259	.	2.79728	27.5867	25.9289	100
Chr1	2361522	2361630	Ara_M5_peak_1475	20	.	1.43544	3.04053	2.0357	97
Chr1	2364759	2364895	Ara_M5_peak_1476	133	.	2.16587	14.7471	13.3372	42
Chr1	2365191	2365726	Ara_M5_peak_1477	882	.	4.54442	90.7257	88.2886	401
Chr1	2365885	2366003	Ara_M5_peak_1478	76	.	1.84188	8.88177	7.62667	22
Chr1	2366430	2367229	Ara_M5_peak_1479	960	.	4.74484	98.5394	96.0274	170
Chr1	2367405	2367551	Ara_M5_peak_1480	90	.	1.93451	10.3711	9.07143	35
Chr1	2368466	2369015	Ara_M5_peak_1481	571	.	3.81174	59.2607	57.1682	175
Chr1	2369616	2370007	Ara_M5_peak_1482	68	.	1.80204	8.12103	6.88703	194
Chr1	2371223	2371290	Ara_M5_peak_1483	122	.	2.13085	13.6434	12.2589	37
Chr1	2374550	2375203	Ara_M5_peak_1484	1296	.	5.83379	132.427	129.622	116
Chr1	2375506	2376046	Ara_M5_peak_1485	187	.	2.48442	20.2289	18.7018	427
Chr1	2376602	2376788	Ara_M5_peak_1486	488	.	3.62542	50.8018	48.8113	143
Chr1	2377944	2378047	Ara_M5_peak_1487	104	.	2.06115	11.757	10.4168	36
Chr1	2379486	2379642	Ara_M5_peak_1488	828	.	4.58815	85.1846	82.8026	67
Chr1	2380939	2381639	Ara_M5_peak_1489	641	.	4.1039	66.3142	64.1375	423
Chr1	2388328	2388556	Ara_M5_peak_1490	94	.	2.00594	10.7919	9.47742	112
Chr1	2389256	2389861	Ara_M5_peak_1491	145	.	2.28199	15.9496	14.5099	171
Chr1	2390081	2390382	Ara_M5_peak_1492	367	.	3.18272	38.6027	36.7786	265
Chr1	2392425	2392824	Ara_M5_peak_1493	139	.	2.23347	15.3872	13.9619	93
Chr1	2393103	2393218	Ara_M5_peak_1494	59	.	1.76507	7.18799	5.98938	16
Chr1	2393399	2394009	Ara_M5_peak_1495	182	.	2.46242	19.7711	18.2563	124
Chr1	2394155	2394277	Ara_M5_peak_1496	77	.	1.89552	8.9671	7.70575	24
Chr1	2394725	2394797	Ara_M5_peak_1497	232	.	2.68686	24.8918	23.2796	46
Chr1	2395006	2395491	Ara_M5_peak_1498	1987	.	7.37965	201.969	198.74	287
Chr1	2398808	2398881	Ara_M5_peak_1499	183	.	2.46602	19.8236	18.3043	48
Chr1	2400559	2400762	Ara_M5_peak_1500	232	.	2.68686	24.8918	23.2796	31
Chr1	2401535	2401651	Ara_M5_peak_1501	58	.	1.7667	7.02448	5.82844	7
Chr1	2402876	2403472	Ara_M5_peak_1502	245	.	2.74207	26.2263	24.5912	187
Chr1	2403785	2403896	Ara_M5_peak_1503	94	.	2.00594	10.7919	9.47742	24
Chr1	2405911	2406062	Ara_M5_peak_1504	320	.	3.03652	33.7694	32.0138	47
Chr1	2406456	2406800	Ara_M5_peak_1505	1781	.	6.93798	181.243	178.117	291
Chr1	2406949	2407194	Ara_M5_peak_1506	58	.	1.7667	7.02448	5.82844	44
Chr1	2407461	2407672	Ara_M5_peak_1507	141	.	2.26358	15.5807	14.149	33
Chr1	2407857	2408189	Ara_M5_peak_1508	684	.	4.23272	70.721	68.4943	250
Chr1	2408418	2408621	Ara_M5_peak_1509	53	.	1.72989	6.50795	5.33121	44
Chr1	2409531	2409591	Ara_M5_peak_1510	259	.	2.79728	27.5867	25.9289	26
Chr1	2409814	2409904	Ara_M5_peak_1511	175	.	2.42921	19.0225	17.5189	50
Chr1	2411971	2412111	Ara_M5_peak_1512	48	.	1.69309	6.0091	4.85215	16
Chr1	2412662	2412722	Ara_M5_peak_1513	272	.	2.85248	28.9725	27.2921	25
Chr1	2412940	2413020	Ara_M5_peak_1514	91	.	1.98754	10.4778	9.17206	30
Chr1	2413684	2414286	Ara_M5_peak_1515	207	.	2.57644	22.3027	20.7366	100
Chr1	2416048	2416290	Ara_M5_peak_1516	1589	.	6.51471	162.002	158.989	89
Chr1	2419538	2419659	Ara_M5_peak_1517	191	.	2.50283	20.6374	19.1024	70
Chr1	2421886	2422288	Ara_M5_peak_1518	1250	.	5.72337	127.802	125.034	110
Chr1	2423686	2424097	Ara_M5_peak_1519	647	.	4.1223	66.938	64.7541	284
Chr1	2428486	2428547	Ara_M5_peak_1520	510	.	3.69903	53.0965	51.0772	34
Chr1	2429502	2429791	Ara_M5_peak_1521	539	.	3.79104	56.0131	53.958	50
Chr1	2431991	2432344	Ara_M5_peak_1522	1101	.	5.35531	112.752	110.112	125
Chr1	2432473	2432943	Ara_M5_peak_1523	372	.	3.13065	39.1182	37.2868	324
Chr1	2433107	2433474	Ara_M5_peak_1524	442	.	3.35725	46.2025	44.2747	51
Chr1	2433656	2433844	Ara_M5_peak_1525	148	.	2.25777	16.2937	14.8504	97
Chr1	2436590	2436721	Ara_M5_peak_1526	100	.	1.97512	11.4018	10.0751	27
Chr1	2436849	2437521	Ara_M5_peak_1527	1746	.	6.52205	177.804	174.699	465
Chr1	2439727	2439853	Ara_M5_peak_1528	45	.	1.64084	5.70393	4.56401	15
Chr1	2440428	2440631	Ara_M5_peak_1529	178	.	2.3043	19.3305	17.8239	29
Chr1	2441603	2441857	Ara_M5_peak_1530	109	.	1.97788	12.2702	10.9194	142
Chr1	2442380	2442588	Ara_M5_peak_1531	339	.	3.03869	35.7297	33.9485	178
Chr1	2442900	2443836	Ara_M5_peak_1532	198	.	2.46855	21.351	19.8055	772
Chr1	2444820	2444918	Ara_M5_peak_1533	151	.	2.27399	16.6441	15.1929	44
Chr1	2445058	2445493	Ara_M5_peak_1534	978	.	4.93144	100.342	97.8148	349
Chr1	2445787	2446076	Ara_M5_peak_1535	527	.	3.75424	54.8401	52.7992	218
Chr1	2447229	2447419	Ara_M5_peak_1536	31	.	1.54586	4.19719	3.12408	182
Chr1	2454437	2454910	Ara_M5_peak_1537	1327	.	5.9074	135.538	132.708	327
Chr1	2457073	2458274	Ara_M5_peak_1538	2094	.	7.42159	212.745	209.474	488
Chr1	2460683	2461350	Ara_M5_peak_1539	148	.	2.27505	16.3142	14.8707	540
Chr1	2461824	2462812	Ara_M5_peak_1540	692	.	4.04711	71.451	69.2167	310
Chr1	2462940	2463122	Ara_M5_peak_1541	82	.	1.93233	9.5594	8.28007	86
Chr1	2465439	2465898	Ara_M5_peak_1542	586	.	3.93827	60.7882	58.6759	73
Chr1	2467003	2467200	Ara_M5_peak_1543	971	.	5.02405	99.7157	97.1915	68
Chr1	2473253	2473434	Ara_M5_peak_1544	31	.	1.54586	4.19719	3.12408	90
Chr1	2474894	2475476	Ara_M5_peak_1545	1043	.	5.20809	106.897	104.308	79
Chr1	2476366	2477175	Ara_M5_peak_1546	344	.	3.12853	36.2665	34.4739	94
Chr1	2482945	2483284	Ara_M5_peak_1547	100	.	2.04275	11.4314	10.0998	38
Chr1	2485026	2485280	Ara_M5_peak_1548	499	.	3.66222	51.9448	49.94	76
Chr1	2485720	2485821	Ara_M5_peak_1549	163	.	2.374	17.8452	16.3654	57
Chr1	2487991	2489157	Ara_M5_peak_1550	1713	.	6.79075	174.48	171.392	819
Chr1	2489435	2489629	Ara_M5_peak_1551	311	.	2.98437	32.9138	31.1723	131
Chr1	2493254	2493533	Ara_M5_peak_1552	2321	.	8.02823	235.494	232.146	195
Chr1	2494293	2494885	Ara_M5_peak_1553	653	.	4.1407	67.5637	65.3726	55
Chr1	2495298	2495357	Ara_M5_peak_1554	77	.	1.89552	8.9671	7.70575	21
Chr1	2498617	2499054	Ara_M5_peak_1555	936	.	4.93204	96.1841	93.6936	129
Chr1	2501423	2501501	Ara_M5_peak_1556	195	.	2.52123	21.0491	19.5063	35
Chr1	2501688	2501870	Ara_M5_peak_1557	94	.	2.00594	10.7919	9.47742	166
Chr1	2511148	2511299	Ara_M5_peak_1558	88	.	1.96913	10.1677	8.87068	37
Chr1	2511507	2511665	Ara_M5_peak_1559	130	.	2.20838	14.4948	13.0877	42
Chr1	2513607	2513665	Ara_M5_peak_1560	156	.	2.3372	17.0769	15.613	31
Chr1	2514165	2514284	Ara_M5_peak_1561	228	.	2.66845	24.4528	22.8483	37
Chr1	2516608	2516773	Ara_M5_peak_1562	1058	.	5.05471	108.496	105.894	93
Chr1	2518077	2518198	Ara_M5_peak_1563	72	.	1.80881	8.4634	7.21932	27
Chr1	2518626	2518753	Ara_M5_peak_1564	98	.	1.96793	11.2205	9.89615	91
Chr1	2519724	2520124	Ara_M5_peak_1565	425	.	3.29698	44.4333	42.5282	197
Chr1	2520277	2521372	Ara_M5_peak_1566	767	.	4.34043	79.0828	76.7679	550
Chr1	2522617	2522960	Ara_M5_peak_1567	305	.	2.98131	32.3022	30.5692	272
Chr1	2530106	2530404	Ara_M5_peak_1568	616	.	4.03028	63.8384	61.6905	209
Chr1	2530668	2530823	Ara_M5_peak_1569	35	.	1.58267	4.62197	3.52719	136
Chr1	2534824	2535010	Ara_M5_peak_1570	191	.	2.50283	20.6374	19.1024	76
Chr1	2535167	2535322	Ara_M5_peak_1571	79	.	1.91393	9.26123	7.99082	75
Chr1	2537790	2538021	Ara_M5_peak_1572	187	.	2.48442	20.2289	18.7018	116
Chr1	2538273	2538656	Ara_M5_peak_1573	1257	.	5.74178	128.569	125.795	188
Chr1	2539213	2539306	Ara_M5_peak_1574	77	.	1.89018	8.97776	7.71627	47
Chr1	2541495	2541609	Ara_M5_peak_1575	38	.	1.6111	4.9834	3.87528	39
Chr1	2542279	2542690	Ara_M5_peak_1576	1917	.	7.23243	194.989	191.791	221
Chr1	2547830	2548447	Ara_M5_peak_1577	1857	.	7.10361	188.94	185.772	485
Chr1	2548583	2548724	Ara_M5_peak_1578	123	.	2.17157	13.7885	12.3979	108
Chr1	2555380	2555455	Ara_M5_peak_1579	156	.	2.3372	17.0769	15.613	53
Chr1	2560416	2560474	Ara_M5_peak_1580	29	.	1.52746	3.99205	2.93	9
Chr1	2560640	2560862	Ara_M5_peak_1581	83	.	1.93571	9.67893	8.39801	27
Chr1	2561264	2561487	Ara_M5_peak_1582	1262	.	5.51607	129.024	126.248	97
Chr1	2562378	2562546	Ara_M5_peak_1583	125	.	2.07851	13.9531	12.5607	32
Chr1	2563721	2564088	Ara_M5_peak_1584	1196	.	5.10063	122.379	119.659	212
Chr1	2564233	2564321	Ara_M5_peak_1585	131	.	2.09801	14.5343	13.1268	41
Chr1	2565070	2565987	Ara_M5_peak_1586	930	.	4.53294	95.5823	93.098	139
Chr1	2566111	2566264	Ara_M5_peak_1587	104	.	1.97951	11.7953	10.4546	118
Chr1	2566630	2566882	Ara_M5_peak_1588	100	.	1.99139	11.3722	10.0459	31
Chr1	2567231	2567453	Ara_M5_peak_1589	733	.	4.23908	75.5788	73.3007	182
Chr1	2573256	2573611	Ara_M5_peak_1590	110	.	2.09796	12.4194	11.0622	101
Chr1	2573732	2574149	Ara_M5_peak_1591	339	.	3.11013	35.762	33.9768	182
Chr1	2576663	2577223	Ara_M5_peak_1592	1220	.	5.64976	124.746	122.003	120
Chr1	2578510	2578585	Ara_M5_peak_1593	22	.	1.45385	3.2208	2.20423	10
Chr1	2580639	2580970	Ara_M5_peak_1594	411	.	3.36777	43.0509	41.1625	201
Chr1	2583315	2583532	Ara_M5_peak_1595	411	.	3.36777	43.0509	41.1625	171
Chr1	2583683	2583752	Ara_M5_peak_1596	159	.	2.3556	17.4594	15.9876	40
Chr1	2584253	2584731	Ara_M5_peak_1597	71	.	1.85872	8.39112	7.14807	262
Chr1	2585498	2585579	Ara_M5_peak_1598	88	.	1.96913	10.1677	8.87068	45
Chr1	2585739	2586230	Ara_M5_peak_1599	211	.	2.59484	22.7267	21.1529	399
Chr1	2586727	2586793	Ara_M5_peak_1600	82	.	1.93233	9.5594	8.28007	30
Chr1	2588374	2588830	Ara_M5_peak_1601	268	.	2.83408	28.5078	26.8348	326
Chr1	2588979	2589042	Ara_M5_peak_1602	110	.	2.09796	12.4194	11.0622	42
Chr1	2590234	2590892	Ara_M5_peak_1603	395	.	3.31256	41.449	39.5828	482
Chr1	2606559	2606675	Ara_M5_peak_1604	53	.	1.72989	6.50795	5.33121	36
Chr1	2606821	2606918	Ara_M5_peak_1605	53	.	1.72989	6.50795	5.33121	47
Chr1	2607638	2608147	Ara_M5_peak_1606	1413	.	6.10984	144.203	141.31	221
Chr1	2610020	2610103	Ara_M5_peak_1607	49	.	1.69079	6.09044	4.9321	16
Chr1	2611944	2612085	Ara_M5_peak_1608	53	.	1.72989	6.50795	5.33121	123
Chr1	2612433	2612602	Ara_M5_peak_1609	50	.	1.71149	6.2563	5.08942	157
Chr1	2613286	2613716	Ara_M5_peak_1610	163	.	2.374	17.8452	16.3654	262
Chr1	2613958	2614089	Ara_M5_peak_1611	127	.	2.18997	14.1398	12.7409	37
Chr1	2614439	2615006	Ara_M5_peak_1612	1713	.	6.79075	174.48	171.392	206
Chr1	2620362	2620489	Ara_M5_peak_1613	53	.	1.72989	6.50795	5.33121	13
Chr1	2621532	2621819	Ara_M5_peak_1614	592	.	3.95667	61.3942	59.2748	42
Chr1	2622549	2622988	Ara_M5_peak_1615	986	.	5.06086	101.139	98.6021	236
Chr1	2625399	2625497	Ara_M5_peak_1616	110	.	2.09796	12.4194	11.0622	31
Chr1	2627211	2627337	Ara_M5_peak_1617	20	.	1.43544	3.04053	2.0357	13
Chr1	2627817	2628050	Ara_M5_peak_1618	191	.	2.50283	20.6374	19.1024	102
Chr1	2628656	2628743	Ara_M5_peak_1619	127	.	2.18997	14.1398	12.7409	32
Chr1	2629378	2629502	Ara_M5_peak_1620	66	.	1.82191	7.83174	6.60726	93
Chr1	2630058	2630653	Ara_M5_peak_1621	666	.	4.17751	68.821	66.6155	491
Chr1	2630781	2630947	Ara_M5_peak_1622	454	.	3.515	47.4256	45.4787	77
Chr1	2633154	2633299	Ara_M5_peak_1623	30	.	1.53315	4.0803	3.01638	14
Chr1	2635005	2635093	Ara_M5_peak_1624	22	.	1.45385	3.2208	2.20423	78
Chr1	2635664	2636055	Ara_M5_peak_1625	245	.	2.74207	26.2263	24.5912	291
Chr1	2636861	2637019	Ara_M5_peak_1626	50	.	1.71149	6.2563	5.08942	67
Chr1	2637634	2637881	Ara_M5_peak_1627	207	.	2.57644	22.3027	20.7366	127
Chr1	2638000	2638161	Ara_M5_peak_1628	245	.	2.74207	26.2263	24.5912	117
Chr1	2639000	2639176	Ara_M5_peak_1629	82	.	1.93233	9.5594	8.28007	111
Chr1	2640413	2640642	Ara_M5_peak_1630	137	.	2.24518	15.2152	13.7917	52
Chr1	2640770	2640957	Ara_M5_peak_1631	60	.	1.7851	7.28928	6.0837	51
Chr1	2641796	2642180	Ara_M5_peak_1632	499	.	3.66222	51.9448	49.94	47
Chr1	2642648	2642883	Ara_M5_peak_1633	50	.	1.71149	6.2563	5.08942	35
Chr1	2646028	2646250	Ara_M5_peak_1634	211	.	2.59484	22.7267	21.1529	44
Chr1	2649294	2649706	Ara_M5_peak_1635	259	.	2.79728	27.5867	25.9289	285
Chr1	2657945	2658084	Ara_M5_peak_1636	137	.	2.24518	15.2152	13.7917	115
Chr1	2661611	2661721	Ara_M5_peak_1637	60	.	1.7851	7.28928	6.0837	76
Chr1	2662216	2662293	Ara_M5_peak_1638	85	.	1.95073	9.86158	8.57336	38
Chr1	2663603	2663734	Ara_M5_peak_1639	77	.	1.89552	8.9671	7.70575	115
Chr1	2666972	2667427	Ara_M5_peak_1640	117	.	2.13476	13.0966	11.7226	352
Chr1	2671444	2671664	Ara_M5_peak_1641	75	.	1.88332	8.82282	7.56857	193
Chr1	2671797	2672483	Ara_M5_peak_1642	753	.	4.42585	77.6565	75.3565	569
Chr1	2673623	2673682	Ara_M5_peak_1643	59	.	1.76716	7.15092	5.9529	37
Chr1	2673820	2674005	Ara_M5_peak_1644	458	.	3.51033	47.8161	45.8666	100
Chr1	2674761	2674846	Ara_M5_peak_1645	50	.	1.68888	6.175	5.0152	54
Chr1	2675656	2675883	Ara_M5_peak_1646	632	.	3.91109	65.4242	63.2598	112
Chr1	2676778	2676922	Ara_M5_peak_1647	112	.	2.03425	12.5735	11.2145	120
Chr1	2677623	2677859	Ara_M5_peak_1648	57	.	1.72746	6.93343	5.74427	35
Chr1	2679491	2679852	Ara_M5_peak_1649	140	.	2.20058	15.4612	14.0351	110
Chr1	2680347	2680823	Ara_M5_peak_1650	187	.	2.444	20.2996	18.7718	319
Chr1	2681010	2681284	Ara_M5_peak_1651	244	.	2.71011	26.0496	24.4199	53
Chr1	2681836	2682292	Ara_M5_peak_1652	695	.	4.2275	71.806	69.5696	149
Chr1	2684053	2684267	Ara_M5_peak_1653	390	.	3.20773	40.9041	39.0489	104
Chr1	2687280	2687391	Ara_M5_peak_1654	163	.	2.374	17.8452	16.3654	59
Chr1	2688564	2689117	Ara_M5_peak_1655	305	.	2.98131	32.3022	30.5692	122
Chr1	2689378	2689437	Ara_M5_peak_1656	82	.	1.93233	9.5594	8.28007	12
Chr1	2690180	2690243	Ara_M5_peak_1657	164	.	2.35245	17.9083	16.4279	29
Chr1	2690626	2691330	Ara_M5_peak_1658	217	.	2.54688	23.2949	21.7121	108
Chr1	2694300	2694533	Ara_M5_peak_1659	672	.	4.19591	69.4524	67.2398	111
Chr1	2694679	2694887	Ara_M5_peak_1660	761	.	4.45356	78.4883	76.1767	66
Chr1	2695010	2695768	Ara_M5_peak_1661	460	.	3.5334	47.9827	46.0285	625
Chr1	2696025	2696176	Ara_M5_peak_1662	48	.	1.69309	6.0091	4.85215	130
Chr1	2696380	2696497	Ara_M5_peak_1663	580	.	3.91987	60.1841	58.0789	59
Chr1	2700188	2700280	Ara_M5_peak_1664	43	.	1.65628	5.52827	4.39152	23
Chr1	2700842	2701215	Ara_M5_peak_1665	868	.	4.74801	89.2429	86.82	258
Chr1	2703069	2703396	Ara_M5_peak_1666	1007	.	5.11607	103.287	100.73	200
Chr1	2706653	2706923	Ara_M5_peak_1667	97	.	2.02434	11.1097	9.78669	95
Chr1	2708926	2709033	Ara_M5_peak_1668	94	.	2.00594	10.7919	9.47742	25
Chr1	2710968	2711485	Ara_M5_peak_1669	1238	.	5.64259	126.577	123.821	183
Chr1	2712040	2712843	Ara_M5_peak_1670	734	.	4.15677	75.6824	73.4037	660
Chr1	2714657	2714942	Ara_M5_peak_1671	398	.	3.17324	41.7231	39.8551	205
Chr1	2715723	2715823	Ara_M5_peak_1672	18	.	1.39158	2.82764	1.84336	90
Chr1	2716362	2717267	Ara_M5_peak_1673	369	.	3.19137	38.7503	36.9251	83
Chr1	2717409	2717542	Ara_M5_peak_1674	130	.	2.20838	14.4948	13.0877	83
Chr1	2717700	2717816	Ara_M5_peak_1675	77	.	1.89552	8.9671	7.70575	91
Chr1	2718180	2718429	Ara_M5_peak_1676	349	.	3.14693	36.7736	34.9737	100
Chr1	2721947	2722167	Ara_M5_peak_1677	438	.	3.45979	45.7679	43.843	178
Chr1	2722353	2722517	Ara_M5_peak_1678	74	.	1.87712	8.67705	7.42486	22
Chr1	2722906	2723159	Ara_M5_peak_1679	37	.	1.60107	4.84152	3.73613	241
Chr1	2723680	2723816	Ara_M5_peak_1680	1167	.	5.52094	119.453	116.755	84
Chr1	2735778	2736307	Ara_M5_peak_1681	971	.	5.02405	99.7157	97.1915	100
Chr1	2736519	2736920	Ara_M5_peak_1682	653	.	4.1407	67.5637	65.3726	70
Chr1	2737351	2737469	Ara_M5_peak_1683	74	.	1.87712	8.67705	7.42486	31
Chr1	2746775	2747447	Ara_M5_peak_1684	354	.	3.16534	37.2832	35.4759	39
Chr1	2747902	2748076	Ara_M5_peak_1685	449	.	3.49659	46.8708	44.9312	106
Chr1	2748677	2748904	Ara_M5_peak_1686	41	.	1.63788	5.29471	4.16835	35
Chr1	2751216	2751532	Ara_M5_peak_1687	759	.	4.05186	78.299	75.9919	214
Chr1	2751910	2752203	Ara_M5_peak_1688	428	.	3.16191	44.7765	42.8655	239
Chr1	2753472	2753564	Ara_M5_peak_1689	51	.	1.66263	6.33733	5.1691	81
Chr1	2753692	2753969	Ara_M5_peak_1690	285	.	2.75621	30.2368	28.5387	222
Chr1	2754146	2754427	Ara_M5_peak_1691	147	.	2.19923	16.1901	14.7479	234
Chr1	2754687	2754827	Ara_M5_peak_1692	100	.	1.96742	11.3775	10.0511	115
Chr1	2755155	2755967	Ara_M5_peak_1693	1119	.	4.9769	114.576	111.922	421
Chr1	2756733	2757058	Ara_M5_peak_1694	682	.	4.04209	70.5075	68.2856	56
Chr1	2757730	2757828	Ara_M5_peak_1695	28	.	1.48906	3.93813	2.88402	77
Chr1	2759772	2760164	Ara_M5_peak_1696	753	.	4.36134	77.6619	75.3619	77
Chr1	2762180	2762278	Ara_M5_peak_1697	117	.	2.13476	13.0966	11.7226	45
Chr1	2762401	2762639	Ara_M5_peak_1698	1242	.	5.70497	127.036	124.274	122
Chr1	2768821	2768937	Ara_M5_peak_1699	148	.	2.30039	16.322	14.8742	39
Chr1	2769600	2769971	Ara_M5_peak_1700	787	.	4.52717	81.1352	78.7954	36
Chr1	2771402	2771695	Ara_M5_peak_1701	1334	.	5.92581	136.319	133.484	143
Chr1	2773612	2774011	Ara_M5_peak_1702	207	.	2.57644	22.3027	20.7366	271
Chr1	2779097	2779368	Ara_M5_peak_1703	97	.	2.02434	11.1097	9.78669	72
Chr1	2780602	2780811	Ara_M5_peak_1704	41	.	1.63788	5.29471	4.16835	195
Chr1	2803254	2803374	Ara_M5_peak_1705	91	.	1.98754	10.4778	9.17206	106
Chr1	2804963	2805312	Ara_M5_peak_1706	499	.	3.66222	51.9448	49.94	100
Chr1	2808463	2808554	Ara_M5_peak_1707	191	.	2.50283	20.6374	19.1024	46
Chr1	2808698	2808904	Ara_M5_peak_1708	1160	.	5.50254	118.703	116.012	56
Chr1	2810315	2810634	Ara_M5_peak_1709	53	.	1.72989	6.50795	5.33121	295
Chr1	2811163	2811339	Ara_M5_peak_1710	684	.	4.23272	70.721	68.4943	55
Chr1	2818403	2818741	Ara_M5_peak_1711	137	.	2.24518	15.2152	13.7917	263
Chr1	2819090	2819161	Ara_M5_peak_1712	18	.	1.41704	2.86538	1.87253	35
Chr1	2820969	2821090	Ara_M5_peak_1713	207	.	2.57644	22.3027	20.7366	66
Chr1	2821347	2821663	Ara_M5_peak_1714	1057	.	5.24489	108.352	105.75	140
Chr1	2821790	2821849	Ara_M5_peak_1715	113	.	2.11636	12.7561	11.3905	23
Chr1	2824283	2824391	Ara_M5_peak_1716	55	.	1.7483	6.76402	5.57757	20
Chr1	2825303	2825977	Ara_M5_peak_1717	137	.	2.24518	15.2152	13.7917	198
Chr1	2826296	2826741	Ara_M5_peak_1718	339	.	3.11013	35.762	33.9768	413
Chr1	2826875	2827144	Ara_M5_peak_1719	827	.	4.63759	85.1581	82.7763	170
Chr1	2829275	2829461	Ara_M5_peak_1720	39	.	1.61948	5.06578	3.94987	30
Chr1	2838873	2839088	Ara_M5_peak_1721	666	.	4.17751	68.821	66.6155	102
Chr1	2841101	2841385	Ara_M5_peak_1722	334	.	3.09173	35.26	33.4822	187
Chr1	2842363	2842801	Ara_M5_peak_1723	148	.	2.30039	16.322	14.8742	329
Chr1	2846247	2846484	Ara_M5_peak_1724	427	.	3.42298	44.6741	42.7637	118
Chr1	2846902	2846994	Ara_M5_peak_1725	88	.	1.96913	10.1677	8.87068	43
Chr1	2847745	2848350	Ara_M5_peak_1726	2141	.	7.68819	217.446	214.16	115
Chr1	2849022	2849125	Ara_M5_peak_1727	227	.	2.61433	24.3746	22.7745	53
Chr1	2850831	2850967	Ara_M5_peak_1728	102	.	1.97255	11.6138	10.28	26
Chr1	2851228	2851328	Ara_M5_peak_1729	192	.	2.3467	20.7673	19.2311	44
Chr1	2851944	2852122	Ara_M5_peak_1730	42	.	1.59246	5.39486	4.26665	85
Chr1	2852307	2852458	Ara_M5_peak_1731	387	.	3.07146	40.5965	38.7435	108
Chr1	2852832	2853094	Ara_M5_peak_1732	116	.	2.06995	12.9871	11.6188	223
Chr1	2853227	2853337	Ara_M5_peak_1733	87	.	1.93775	10.0193	8.72902	80
Chr1	2854183	2854241	Ara_M5_peak_1734	41	.	1.63075	5.26993	4.15014	53
Chr1	2854515	2854738	Ara_M5_peak_1735	187	.	2.47962	20.2952	18.7674	174
Chr1	2854993	2855178	Ara_M5_peak_1736	297	.	2.9404	31.4544	29.7354	156
Chr1	2855366	2855430	Ara_M5_peak_1737	167	.	2.39241	18.2344	16.7466	29
Chr1	2855648	2856191	Ara_M5_peak_1738	781	.	4.50877	80.4708	78.138	488
Chr1	2860881	2860998	Ara_M5_peak_1739	79	.	1.91393	9.26123	7.99082	42
Chr1	2861572	2862280	Ara_M5_peak_1740	82	.	1.93233	9.5594	8.28007	519
Chr1	2862504	2863063	Ara_M5_peak_1741	533	.	3.77264	55.4256	53.3775	440
Chr1	2864101	2864285	Ara_M5_peak_1742	71	.	1.85872	8.39112	7.14807	110
Chr1	2865415	2866012	Ara_M5_peak_1743	89	.	1.94457	10.2645	8.9662	525
Chr1	2866445	2867335	Ara_M5_peak_1744	531	.	3.67452	55.1624	53.1196	204
Chr1	2870270	2870992	Ara_M5_peak_1745	185	.	2.36722	20.1208	18.5986	417
Chr1	2871824	2872103	Ara_M5_peak_1746	613	.	3.89571	63.5085	61.3661	216
Chr1	2872241	2872977	Ara_M5_peak_1747	669	.	4.04558	69.1731	66.9656	527
Chr1	2873120	2873313	Ara_M5_peak_1748	106	.	2.03092	11.993	10.65	166
Chr1	2873435	2873508	Ara_M5_peak_1749	112	.	2.062	12.5985	11.2392	26
Chr1	2874202	2874419	Ara_M5_peak_1750	153	.	2.24441	16.7705	15.3139	183
Chr1	2874964	2875165	Ara_M5_peak_1751	52	.	1.68218	6.4123	5.24281	8
Chr1	2876477	2876968	Ara_M5_peak_1752	224	.	2.64483	24.0909	22.4933	84
Chr1	2877444	2877686	Ara_M5_peak_1753	268	.	2.83408	28.5078	26.8348	143
Chr1	2879022	2879246	Ara_M5_peak_1754	152	.	2.31879	16.6977	15.2419	183
Chr1	2879419	2879622	Ara_M5_peak_1755	104	.	2.06115	11.757	10.4168	165
Chr1	2882099	2882581	Ara_M5_peak_1756	454	.	3.515	47.4256	45.4787	368
Chr1	2883947	2884462	Ara_M5_peak_1757	755	.	4.43515	77.831	75.5264	413
Chr1	2886407	2886736	Ara_M5_peak_1758	460	.	3.5334	47.9827	46.0285	110
Chr1	2887241	2887589	Ara_M5_peak_1759	82	.	1.93233	9.5594	8.28007	308
Chr1	2887887	2887945	Ara_M5_peak_1760	167	.	2.39241	18.2344	16.7466	31
Chr1	2888428	2888522	Ara_M5_peak_1761	27	.	1.50906	3.79179	2.74092	85
Chr1	2890724	2891020	Ara_M5_peak_1762	127	.	2.18997	14.1398	12.7409	34
Chr1	2895040	2895102	Ara_M5_peak_1763	175	.	2.42921	19.0225	17.5189	43
Chr1	2899335	2899440	Ara_M5_peak_1764	148	.	2.30039	16.322	14.8742	39
Chr1	2899612	2899760	Ara_M5_peak_1765	41	.	1.63788	5.29471	4.16835	24
Chr1	2904787	2904872	Ara_M5_peak_1766	232	.	2.68686	24.8918	23.2796	53
Chr1	2905763	2905877	Ara_M5_peak_1767	163	.	2.374	17.8452	16.3654	52
Chr1	2907354	2907791	Ara_M5_peak_1768	245	.	2.74207	26.2263	24.5912	210
Chr1	2909133	2909192	Ara_M5_peak_1769	179	.	2.44762	19.4214	17.91	22
Chr1	2909693	2909795	Ara_M5_peak_1770	37	.	1.60107	4.84152	3.73613	9
Chr1	2910486	2910984	Ara_M5_peak_1771	539	.	3.79104	56.0131	53.958	213
Chr1	2911175	2911297	Ara_M5_peak_1772	516	.	3.71743	53.6756	51.6491	54
Chr1	2915327	2915470	Ara_M5_peak_1773	60	.	1.7851	7.28928	6.0837	113
Chr1	2915961	2916211	Ara_M5_peak_1774	1849	.	7.0852	188.08	184.917	82
Chr1	2916385	2916626	Ara_M5_peak_1775	97	.	2.02434	11.1097	9.78669	126
Chr1	2916779	2916995	Ara_M5_peak_1776	814	.	4.60078	83.8102	81.4424	134
Chr1	2920944	2921203	Ara_M5_peak_1777	179	.	2.44762	19.4214	17.91	229
Chr1	2925767	2926002	Ara_M5_peak_1778	60	.	1.7851	7.28928	6.0837	119
Chr1	2926600	2927031	Ara_M5_peak_1779	964	.	5.00565	99.0062	96.4888	95
Chr1	2927187	2927328	Ara_M5_peak_1780	85	.	1.95073	9.86158	8.57336	29
Chr1	2927525	2927726	Ara_M5_peak_1781	433	.	3.44139	45.2198	43.3022	89
Chr1	2928885	2929144	Ara_M5_peak_1782	259	.	2.79728	27.5867	25.9289	56
Chr1	2931881	2932077	Ara_M5_peak_1783	510	.	3.69903	53.0965	51.0772	47
Chr1	2932242	2932720	Ara_M5_peak_1784	653	.	4.1407	67.5637	65.3726	52
Chr1	2933526	2933610	Ara_M5_peak_1785	35	.	1.58267	4.62197	3.52719	42
Chr1	2935301	2935410	Ara_M5_peak_1786	46	.	1.67468	5.76641	4.61949	31
Chr1	2937504	2937616	Ara_M5_peak_1787	39	.	1.61948	5.06578	3.94987	20
Chr1	2939288	2939377	Ara_M5_peak_1788	385	.	3.27576	40.3929	38.5413	39
Chr1	2942293	2942784	Ara_M5_peak_1789	488	.	3.62542	50.8018	48.8113	163
Chr1	2945914	2946263	Ara_M5_peak_1790	1831	.	6.95375	186.277	183.126	185
Chr1	2949181	2949502	Ara_M5_peak_1791	411	.	3.30099	42.9883	41.1041	107
Chr1	2950897	2951085	Ara_M5_peak_1792	448	.	3.42425	46.7492	44.8141	74
Chr1	2951259	2951537	Ara_M5_peak_1793	74	.	1.87712	8.67705	7.42486	188
Chr1	2952621	2953109	Ara_M5_peak_1794	645	.	4.10884	66.6907	64.5118	216
Chr1	2953954	2954261	Ara_M5_peak_1795	245	.	2.74207	26.2263	24.5912	180
Chr1	2955666	2955873	Ara_M5_peak_1796	1508	.	6.33068	153.836	150.876	94
Chr1	2956101	2956837	Ara_M5_peak_1797	1021	.	5.15288	104.726	102.157	389
Chr1	2959938	2960039	Ara_M5_peak_1798	29	.	1.52746	3.99205	2.93	7
Chr1	2962882	2963244	Ara_M5_peak_1799	183	.	2.46602	19.8236	18.3043	229
Chr1	2963409	2964262	Ara_M5_peak_1800	493	.	3.64382	51.3722	49.3746	531
Chr1	2964651	2965043	Ara_M5_peak_1801	861	.	4.7296	88.5578	86.1418	78
Chr1	2967729	2967953	Ara_M5_peak_1802	377	.	3.16994	39.6135	37.7749	109
Chr1	2971511	2971674	Ara_M5_peak_1803	254	.	2.77887	27.1304	25.4801	78
Chr1	2972233	2972896	Ara_M5_peak_1804	703	.	4.25181	72.5599	70.316	313
Chr1	2976710	2977444	Ara_M5_peak_1805	936	.	4.93204	96.1841	93.6936	279
Chr1	2977639	2977804	Ara_M5_peak_1806	35	.	1.58267	4.62197	3.52719	6
Chr1	2979460	2979686	Ara_M5_peak_1807	103	.	2.04728	11.6704	10.3359	115
Chr1	2982566	2983313	Ara_M5_peak_1808	576	.	3.80961	59.7439	57.6448	632
Chr1	2983430	2983704	Ara_M5_peak_1809	170	.	2.32248	18.5514	17.0606	148
Chr1	2983982	2984136	Ara_M5_peak_1810	162	.	2.25792	17.7678	16.2928	27
Chr1	2984715	2984886	Ara_M5_peak_1811	81	.	1.84004	9.40446	8.13212	35
Chr1	2987363	2987868	Ara_M5_peak_1812	941	.	4.21539	96.5931	94.1008	372
Chr1	2987995	2988731	Ara_M5_peak_1813	315	.	2.72245	33.3442	31.5956	254
Chr1	2989078	2989375	Ara_M5_peak_1814	402	.	3.06199	42.1644	40.2896	259
Chr1	2990677	2991615	Ara_M5_peak_1815	845	.	4.29944	86.994	84.596	309
Chr1	2991802	2992099	Ara_M5_peak_1816	75	.	1.81284	8.84104	7.58653	42
Chr1	2994107	2994323	Ara_M5_peak_1817	296	.	2.9445	31.3374	29.6192	107
Chr1	2998057	2998221	Ara_M5_peak_1818	33	.	1.56427	4.40718	3.32319	135
Chr1	3001345	3001579	Ara_M5_peak_1819	697	.	4.26953	71.9972	69.7563	94
Chr1	3002151	3002217	Ara_M5_peak_1820	58	.	1.7667	7.02448	5.82844	48
Chr1	3003778	3003897	Ara_M5_peak_1821	163	.	2.374	17.8452	16.3654	52
Chr1	3008181	3008689	Ara_M5_peak_1822	241	.	2.72366	25.7786	24.1511	164
Chr1	3008887	3009091	Ara_M5_peak_1823	1319	.	5.889	134.758	131.934	103
Chr1	3012335	3012865	Ara_M5_peak_1824	566	.	3.86915	58.7313	56.6455	262
Chr1	3013499	3013662	Ara_M5_peak_1825	143	.	2.24594	15.7858	14.352	127
Chr1	3013807	3013875	Ara_M5_peak_1826	137	.	2.2183	15.1744	13.7556	53
Chr1	3015092	3015421	Ara_M5_peak_1827	403	.	3.15682	42.2317	40.3564	215
Chr1	3018068	3018551	Ara_M5_peak_1828	588	.	3.77997	60.9954	58.8819	245
Chr1	3018772	3019819	Ara_M5_peak_1829	921	.	4.76531	94.6079	92.1351	668
Chr1	3020573	3020756	Ara_M5_peak_1830	104	.	2.06115	11.757	10.4168	137
Chr1	3021345	3021411	Ara_M5_peak_1831	35	.	1.58267	4.62197	3.52719	55
Chr1	3025547	3025688	Ara_M5_peak_1832	33	.	1.56427	4.40718	3.32319	123
Chr1	3029410	3029653	Ara_M5_peak_1833	97	.	2.02434	11.1097	9.78669	99
Chr1	3030004	3030318	Ara_M5_peak_1834	137	.	2.24518	15.2152	13.7917	95
Chr1	3030467	3030694	Ara_M5_peak_1835	1892	.	7.17722	192.39	189.205	114
Chr1	3030827	3031265	Ara_M5_peak_1836	957	.	4.98725	98.2983	95.7875	323
Chr1	3031560	3032116	Ara_M5_peak_1837	641	.	4.1039	66.3142	64.1375	37
Chr1	3037652	3037827	Ara_M5_peak_1838	37	.	1.60107	4.84152	3.73613	118
Chr1	3038362	3038592	Ara_M5_peak_1839	385	.	3.27576	40.3929	38.5413	112
Chr1	3041770	3041889	Ara_M5_peak_1840	91	.	1.98754	10.4778	9.17206	95
Chr1	3045221	3045343	Ara_M5_peak_1841	120	.	2.15317	13.4407	12.0584	29
Chr1	3046545	3046665	Ara_M5_peak_1842	63	.	1.80351	7.55838	6.3433	39
Chr1	3047482	3047749	Ara_M5_peak_1843	390	.	3.29416	40.9197	39.0609	198
Chr1	3047941	3048188	Ara_M5_peak_1844	100	.	2.04275	11.4314	10.0998	92
Chr1	3048395	3048911	Ara_M5_peak_1845	653	.	4.1407	67.5637	65.3726	436
Chr1	3052891	3053027	Ara_M5_peak_1846	46	.	1.67468	5.76641	4.61949	30
Chr1	3057031	3057313	Ara_M5_peak_1847	449	.	3.49659	46.8708	44.9312	195
Chr1	3057558	3058512	Ara_M5_peak_1848	1428	.	6.14664	145.796	142.891	839
Chr1	3059140	3059264	Ara_M5_peak_1849	46	.	1.67468	5.76641	4.61949	26
Chr1	3060897	3061091	Ara_M5_peak_1850	43	.	1.65628	5.52827	4.39152	94
Chr1	3063382	3063470	Ara_M5_peak_1851	315	.	3.01811	33.2777	31.5296	38
Chr1	3063980	3064165	Ara_M5_peak_1852	847	.	4.6928	87.1929	84.7906	47
Chr1	3065769	3066232	Ara_M5_peak_1853	232	.	2.68686	24.8918	23.2796	265
Chr1	3066470	3066780	Ara_M5_peak_1854	325	.	3.05492	34.2636	32.5006	224
Chr1	3069271	3069349	Ara_M5_peak_1855	100	.	2.04275	11.4314	10.0998	30
Chr1	3070747	3070828	Ara_M5_peak_1856	27	.	1.50906	3.79179	2.74092	76
Chr1	3072059	3073259	Ara_M5_peak_1857	703	.	4.28793	72.638	70.3901	498
Chr1	3075328	3075765	Ara_M5_peak_1858	970	.	4.84423	99.5996	97.0793	322
Chr1	3076441	3076544	Ara_M5_peak_1859	37	.	1.57287	4.81249	3.71394	63
Chr1	3079321	3080379	Ara_M5_peak_1860	1689	.	6.52162	171.981	168.908	270
Chr1	3081286	3081450	Ara_M5_peak_1861	277	.	2.83686	29.4162	27.7322	118
Chr1	3082256	3082711	Ara_M5_peak_1862	62	.	1.79304	7.44089	6.23294	450
Chr1	3083438	3083496	Ara_M5_peak_1863	57	.	1.75703	6.97803	5.78815	20
Chr1	3083662	3083957	Ara_M5_peak_1864	43	.	1.64696	5.48194	4.35209	250
Chr1	3084206	3084455	Ara_M5_peak_1865	220	.	2.61632	23.6525	22.0626	95
Chr1	3084704	3084767	Ara_M5_peak_1866	175	.	2.42921	19.0225	17.5189	28
Chr1	3085090	3085219	Ara_M5_peak_1867	27	.	1.50906	3.79179	2.74092	24
Chr1	3085777	3085928	Ara_M5_peak_1868	259	.	2.79728	27.5867	25.9289	50
Chr1	3086067	3086185	Ara_M5_peak_1869	100	.	2.04275	11.4314	10.0998	68
Chr1	3091152	3091274	Ara_M5_peak_1870	63	.	1.80351	7.55838	6.3433	96
Chr1	3092307	3092451	Ara_M5_peak_1871	175	.	2.42921	19.0225	17.5189	122
Chr1	3092622	3092787	Ara_M5_peak_1872	77	.	1.89552	8.9671	7.70575	30
Chr1	3093162	3093883	Ara_M5_peak_1873	943	.	4.95044	96.8873	94.3902	85
Chr1	3094756	3095093	Ara_M5_peak_1874	100	.	2.04275	11.4314	10.0998	242
Chr1	3095210	3095331	Ara_M5_peak_1875	94	.	2.00594	10.7919	9.47742	31
Chr1	3099784	3100065	Ara_M5_peak_1876	25	.	1.49065	3.59647	2.55692	266
Chr1	3100243	3100897	Ara_M5_peak_1877	228	.	2.66845	24.4528	22.8483	107
Chr1	3101104	3101694	Ara_M5_peak_1878	163	.	2.374	17.8452	16.3654	201
Chr1	3101934	3101997	Ara_M5_peak_1879	60	.	1.77982	7.29265	6.08701	31
Chr1	3102925	3103801	Ara_M5_peak_1880	142	.	2.21362	15.6514	14.219	109
Chr1	3104363	3104607	Ara_M5_peak_1881	1007	.	4.85957	103.339	100.782	138
Chr1	3106030	3106513	Ara_M5_peak_1882	1204	.	5.61295	123.227	120.497	352
Chr1	3107245	3107361	Ara_M5_peak_1883	156	.	2.3372	17.0769	15.613	25
Chr1	3107623	3107812	Ara_M5_peak_1884	148	.	2.30039	16.322	14.8742	92
Chr1	3107947	3108017	Ara_M5_peak_1885	27	.	1.50906	3.79179	2.74092	67
Chr1	3116663	3116972	Ara_M5_peak_1886	598	.	3.97508	62.0023	59.8757	51
Chr1	3117144	3117288	Ara_M5_peak_1887	77	.	1.89552	8.9671	7.70575	123
Chr1	3117877	3117936	Ara_M5_peak_1888	71	.	1.85872	8.39112	7.14807	20
Chr1	3118255	3118356	Ara_M5_peak_1889	94	.	2.00594	10.7919	9.47742	24
Chr1	3119587	3119934	Ara_M5_peak_1890	1262	.	5.70582	129.047	126.27	124
Chr1	3122180	3123008	Ara_M5_peak_1891	1050	.	5.11749	107.638	105.043	776
Chr1	3123684	3123838	Ara_M5_peak_1892	87	.	1.94311	10.0869	8.79565	43
Chr1	3124387	3124511	Ara_M5_peak_1893	152	.	2.30403	16.7274	15.2712	103
Chr1	3124869	3125420	Ara_M5_peak_1894	215	.	2.61324	23.1537	21.5722	334
Chr1	3127306	3127398	Ara_M5_peak_1895	29	.	1.50501	4.02688	2.96409	74
Chr1	3127641	3127721	Ara_M5_peak_1896	51	.	1.70092	6.35939	5.19079	28
Chr1	3128447	3128524	Ara_M5_peak_1897	18	.	1.41527	2.8513	1.86637	52
Chr1	3130997	3131973	Ara_M5_peak_1898	1227	.	5.66816	125.508	122.759	324
Chr1	3132769	3132993	Ara_M5_peak_1899	44	.	1.63475	5.63793	4.49921	210
Chr1	3134164	3134284	Ara_M5_peak_1900	143	.	2.22196	15.7729	14.3392	73
Chr1	3135962	3136231	Ara_M5_peak_1901	494	.	3.4446	51.4832	49.4848	159
Chr1	3136681	3136823	Ara_M5_peak_1902	60	.	1.78094	7.30526	6.09943	57
Chr1	3137481	3137940	Ara_M5_peak_1903	1108	.	5.37371	113.491	110.844	205
Chr1	3140270	3140337	Ara_M5_peak_1904	156	.	2.3372	17.0769	15.613	34
Chr1	3140546	3140895	Ara_M5_peak_1905	957	.	4.98725	98.2983	95.7875	196
Chr1	3147515	3147813	Ara_M5_peak_1906	137	.	2.24518	15.2152	13.7917	27
Chr1	3154356	3154541	Ara_M5_peak_1907	359	.	3.18374	37.7953	35.9807	122
Chr1	3155100	3155210	Ara_M5_peak_1908	39	.	1.61948	5.06578	3.94987	18
Chr1	3155980	3157114	Ara_M5_peak_1909	339	.	3.11013	35.762	33.9768	961
Chr1	3157260	3157568	Ara_M5_peak_1910	592	.	3.95667	61.3942	59.2748	216
Chr1	3159002	3159115	Ara_M5_peak_1911	41	.	1.63788	5.29471	4.16835	11
Chr1	3160196	3160315	Ara_M5_peak_1912	27	.	1.50906	3.79179	2.74092	96
Chr1	3161633	3161850	Ara_M5_peak_1913	1000	.	5.09767	102.57	100.019	113
Chr1	3165138	3165210	Ara_M5_peak_1914	110	.	2.09796	12.4194	11.0622	32
Chr1	3165414	3165541	Ara_M5_peak_1915	104	.	2.06115	11.757	10.4168	109
Chr1	3167863	3168537	Ara_M5_peak_1916	1057	.	5.24489	108.352	105.75	127
Chr1	3171470	3171532	Ara_M5_peak_1917	100	.	2.04275	11.4314	10.0998	28
Chr1	3171947	3172119	Ara_M5_peak_1918	610	.	4.01188	63.2244	61.0836	45
Chr1	3172708	3172819	Ara_M5_peak_1919	33	.	1.56427	4.40718	3.32319	103
Chr1	3173340	3173598	Ara_M5_peak_1920	315	.	3.01811	33.2777	31.5296	147
Chr1	3179687	3179839	Ara_M5_peak_1921	85	.	1.95073	9.86158	8.57336	14
Chr1	3180351	3180828	Ara_M5_peak_1922	527	.	3.75424	54.8401	52.7992	96
Chr1	3180952	3181067	Ara_M5_peak_1923	24	.	1.47871	3.49275	2.46258	13
Chr1	3181283	3181399	Ara_M5_peak_1924	38	.	1.60169	4.9345	3.82734	80
Chr1	3184175	3184572	Ara_M5_peak_1925	2363	.	7.33064	239.695	236.336	222
Chr1	3185302	3185374	Ara_M5_peak_1926	56	.	1.68576	6.86874	5.68061	53
Chr1	3185699	3185803	Ara_M5_peak_1927	50	.	1.65272	6.1727	5.01294	83
Chr1	3186872	3187126	Ara_M5_peak_1928	698	.	4.01208	72.1295	69.888	57
Chr1	3187274	3187564	Ara_M5_peak_1929	412	.	3.19272	43.1195	41.2306	205
Chr1	3188889	3189408	Ara_M5_peak_1930	1000	.	4.85677	102.595	100.044	444
Chr1	3190255	3190440	Ara_M5_peak_1931	221	.	2.59153	23.7143	22.1239	71
Chr1	3191239	3191367	Ara_M5_peak_1932	53	.	1.68783	6.47711	5.30649	115
Chr1	3194936	3195690	Ara_M5_peak_1933	1160	.	5.50254	118.703	116.012	646
Chr1	3195897	3196060	Ara_M5_peak_1934	127	.	2.18997	14.1398	12.7409	47
Chr1	3196309	3196465	Ara_M5_peak_1935	318	.	3.02564	33.5914	31.841	129
Chr1	3200173	3200403	Ara_M5_peak_1936	359	.	3.18374	37.7953	35.9807	104
Chr1	3200585	3200847	Ara_M5_peak_1937	63	.	1.80351	7.55838	6.3433	253
Chr1	3201049	3201868	Ara_M5_peak_1938	334	.	3.09173	35.26	33.4822	247
Chr1	3203988	3204088	Ara_M5_peak_1939	46	.	1.67468	5.76641	4.61949	31
Chr1	3205347	3205712	Ara_M5_peak_1940	187	.	2.48442	20.2289	18.7018	225
Chr1	3208872	3208987	Ara_M5_peak_1941	130	.	2.20838	14.4948	13.0877	50
Chr1	3209634	3209744	Ara_M5_peak_1942	18	.	1.41704	2.86538	1.87253	11
Chr1	3212233	3212559	Ara_M5_peak_1943	127	.	2.18997	14.1398	12.7409	37
Chr1	3212808	3212886	Ara_M5_peak_1944	334	.	3.09173	35.26	33.4822	26
Chr1	3217236	3217380	Ara_M5_peak_1945	53	.	1.72989	6.50795	5.33121	65
Chr1	3217546	3218004	Ara_M5_peak_1946	861	.	4.7296	88.5578	86.1418	331
Chr1	3220033	3220287	Ara_M5_peak_1947	110	.	2.09796	12.4194	11.0622	144
Chr1	3227036	3227305	Ara_M5_peak_1948	349	.	3.14693	36.7736	34.9737	110
Chr1	3231415	3231858	Ara_M5_peak_1949	1007	.	5.11607	103.287	100.73	50
Chr1	3235706	3235856	Ara_M5_peak_1950	53	.	1.72989	6.50795	5.33121	22
Chr1	3236037	3236161	Ara_M5_peak_1951	152	.	2.31879	16.6977	15.2419	89
Chr1	3236301	3236408	Ara_M5_peak_1952	63	.	1.80351	7.55838	6.3433	91
Chr1	3236827	3237131	Ara_M5_peak_1953	215	.	2.61324	23.1537	21.5722	149
Chr1	3239421	3239620	Ara_M5_peak_1954	266	.	2.71442	28.3667	26.6987	102
Chr1	3239811	3240706	Ara_M5_peak_1955	497	.	3.49485	51.7628	49.7627	451
Chr1	3241550	3241625	Ara_M5_peak_1956	94	.	1.96167	10.8093	9.49469	27
Chr1	3241992	3242259	Ara_M5_peak_1957	588	.	3.83471	61.008	58.8944	102
Chr1	3242869	3243208	Ara_M5_peak_1958	786	.	4.17478	80.9996	78.664	237
Chr1	3243496	3243900	Ara_M5_peak_1959	144	.	2.15972	15.8905	14.4556	68
Chr1	3244025	3244197	Ara_M5_peak_1960	240	.	2.53607	25.6837	24.061	74
Chr1	3247729	3248106	Ara_M5_peak_1961	1220	.	5.42545	124.787	122.044	290
Chr1	3248881	3249459	Ara_M5_peak_1962	697	.	4.26953	71.9972	69.7563	296
Chr1	3249983	3250304	Ara_M5_peak_1963	228	.	2.66845	24.4528	22.8483	156
Chr1	3251459	3251593	Ara_M5_peak_1964	310	.	2.99971	32.7886	31.0481	96
Chr1	3251968	3252285	Ara_M5_peak_1965	522	.	3.73584	54.2568	52.2231	202
Chr1	3255519	3256265	Ara_M5_peak_1966	254	.	2.77887	27.1304	25.4801	415
Chr1	3256401	3256525	Ara_M5_peak_1967	175	.	2.42921	19.0225	17.5189	22
Chr1	3257191	3257311	Ara_M5_peak_1968	58	.	1.7667	7.02448	5.82844	13
Chr1	3261542	3262090	Ara_M5_peak_1969	1296	.	5.83379	132.427	129.622	346
Chr1	3262443	3262685	Ara_M5_peak_1970	622	.	4.04869	64.4544	62.2992	148
Chr1	3263580	3263947	Ara_M5_peak_1971	533	.	3.77264	55.4256	53.3775	86
Chr1	3264970	3265101	Ara_M5_peak_1972	269	.	2.78555	28.5773	26.9038	98
Chr1	3265807	3265924	Ara_M5_peak_1973	151	.	2.29851	16.6488	15.1976	40
Chr1	3266831	3266910	Ara_M5_peak_1974	79	.	1.91393	9.26123	7.99082	41
Chr1	3268700	3269532	Ara_M5_peak_1975	334	.	3.09173	35.26	33.4822	445
Chr1	3270006	3270087	Ara_M5_peak_1976	130	.	2.20838	14.4948	13.0877	33
Chr1	3271946	3272220	Ara_M5_peak_1977	586	.	3.93827	60.7882	58.6759	167
Chr1	3272464	3272835	Ara_M5_peak_1978	300	.	2.9629	31.8185	30.0928	224
Chr1	3273025	3273144	Ara_M5_peak_1979	53	.	1.72989	6.50795	5.33121	30
Chr1	3273284	3273803	Ara_M5_peak_1980	729	.	4.36154	75.2199	72.9438	405
Chr1	3276551	3276619	Ara_M5_peak_1981	39	.	1.61948	5.06578	3.94987	22
Chr1	3278625	3278978	Ara_M5_peak_1982	1167	.	5.52094	119.453	116.755	155
Chr1	3279934	3280005	Ara_M5_peak_1983	41	.	1.63788	5.29471	4.16835	55
Chr1	3283673	3284104	Ara_M5_peak_1984	241	.	2.72366	25.7786	24.1511	191
Chr1	3284236	3284489	Ara_M5_peak_1985	88	.	1.96913	10.1677	8.87068	75
Chr1	3287076	3287761	Ara_M5_peak_1986	443	.	3.47819	46.3182	44.3859	304
Chr1	3290188	3290319	Ara_M5_peak_1987	53	.	1.72989	6.50795	5.33121	116
Chr1	3290893	3290951	Ara_M5_peak_1988	100	.	2.04275	11.4314	10.0998	23
Chr1	3296090	3296779	Ara_M5_peak_1989	1680	.	6.71714	171.126	168.058	410
Chr1	3297024	3297349	Ara_M5_peak_1990	241	.	2.72366	25.7786	24.1511	196
Chr1	3301617	3301682	Ara_M5_peak_1991	46	.	1.67468	5.76641	4.61949	54
Chr1	3301886	3302692	Ara_M5_peak_1992	1327	.	5.9074	135.538	132.708	278
Chr1	3304002	3304219	Ara_M5_peak_1993	55	.	1.7483	6.76402	5.57757	103
Chr1	3306171	3306545	Ara_M5_peak_1994	409	.	3.21102	42.8406	40.9574	138
Chr1	3306931	3307063	Ara_M5_peak_1995	241	.	2.62532	25.7623	24.1389	94
Chr1	3307393	3307603	Ara_M5_peak_1996	103	.	2.05376	11.6626	10.3281	104
Chr1	3308442	3308538	Ara_M5_peak_1997	148	.	2.30039	16.322	14.8742	31
Chr1	3309411	3309528	Ara_M5_peak_1998	123	.	2.17157	13.7885	12.3979	35
Chr1	3309781	3310152	Ara_M5_peak_1999	868	.	4.74801	89.2429	86.82	96
Chr1	3310394	3311002	Ara_M5_peak_2000	1043	.	5.20809	106.897	104.308	532
[truncated: 58,034 more rows]
