# Supplementary material for: Modelling genetic variation effects in plant gene regulatory networks using transfer learning on genomic and transcription factor binding data
Source: Research Square preprint supplement (doi:10.21203/rs.3.rs-6247751/v1), 2025-04-10
Supplement: Supplementary file 3 [file 46ad31cd6d2f4adf67207e7c.xlsx]

## Sheet: Sheet1
Supplementary table 3 - Similarity search of interaction predictive motifs to the JASPAR database
subj	ID	targ	scor	pval	eval
ipm_Arth_ABI3VP1_p0m00F_949	MA1281.1	AT5G02460	1884	0.001	1721
ipm_Arth_ABI3VP1_p0m00R_949	MA1281.1	AT5G02460	1884	0.001	1721
ipm_Arth_ABI3VP1_p0m01F_558	MA1281.1	AT5G02460	1877	0.002	2288
ipm_Arth_ABI3VP1_p0m01R_558	MA1281.1	AT5G02460	1877	0.002	2288
ipm_Arth_AP2EREBP_p0m00F_1587	MA0975.1	CRF2	1979	0.001	1880
ipm_Arth_AP2EREBP_p0m00R_1587	MA0975.1	CRF2	1979	0.001	1880
ipm_Arth_AP2EREBP_p0m01F_35	MA1285.1	At2g45680	1848	0.004	6314
ipm_Arth_AP2EREBP_p0m01R_35	MA1285.1	At2g45680	1848	0.004	6314
ipm_Arth_ARF_p0m00F_1838	MA0943.1	ARF5	1973	0.001	2154
ipm_Arth_ARF_p0m00R_1838	MA0943.1	ARF5	1973	0.001	2154
ipm_Arth_ARF_p0m01F_146	MA0045.1	HMG-I/Y	1835	0.006	9628
ipm_Arth_ARF_p0m01R_146	MA0045.1	HMG-I/Y	1835	0.006	9628
ipm_Arth_ARF_p0m02F_36	MA1206.1	ARF2	1888	0.001	1450
ipm_Arth_ARF_p0m02R_36	MA1206.1	ARF2	1888	0.001	1450
ipm_Arth_ARID_p0m00F_251	MA1327.2	ATHB23	1928	0.000	0.224
ipm_Arth_ARID_p0m00R_251	MA1327.2	ATHB23	1928	0.000	0.224
ipm_Arth_ARID_p0m01F_137	MA0933.1	AHL20	1942	0.003	4041
ipm_Arth_ARID_p0m01R_137	MA0933.1	AHL20	1942	0.003	4041
ipm_Arth_ARID_p0m02F_83	MA0933.1	AHL20	1945	0.003	3808
ipm_Arth_ARID_p0m02R_83	MA0933.1	AHL20	1945	0.003	3808
ipm_Arth_ARID_p0m03F_72	MA0933.1	AHL20	1951	0.002	3381
ipm_Arth_ARID_p0m03R_72	MA0933.1	AHL20	1951	0.002	3381
ipm_Arth_ARID_p0m04F_69	MA0951.1	ATHB-16	1970	0.002	2267
ipm_Arth_ARID_p0m04R_69	MA0951.1	ATHB-16	1970	0.002	2267
ipm_Arth_ARID_p0m05F_38	MA0933.1	AHL20	1980	0.001	1839
ipm_Arth_ARID_p0m05R_38	MA0933.1	AHL20	1980	0.001	1839
ipm_Arth_BBRBPC_p0m00F_1309	MA1403.1	BPC5	1958	0.000	0.043
ipm_Arth_BBRBPC_p0m00R_1309	MA1403.1	BPC5	1958	0.000	0.043
ipm_Arth_BES1_p0m00F_976	MA0957.1	BHLH3	1969	0.002	2311
ipm_Arth_BES1_p0m00R_976	MA0957.1	BHLH3	1969	0.002	2311
ipm_Arth_bHLH_p0m00F_1190	MA0958.1	BHLH13	1987	0.001	1593
ipm_Arth_bHLH_p0m00R_1190	MA0958.1	BHLH13	1987	0.001	1593
ipm_Arth_bHLH_p0m01F_310	MA1223.1	ERF035	1986	0.000	0.007
ipm_Arth_bHLH_p0m01R_310	MA1223.1	ERF035	1986	0.000	0.007
ipm_Arth_bZIP_p0m00F_722	MA0096.1	bZIP910	1996	0.001	2124
ipm_Arth_bZIP_p0m00R_722	MA0096.1	bZIP910	1996	0.001	2124
ipm_Arth_bZIP_p0m01F_632	MA0570.2	ABF1	1970	0.000	0.020
ipm_Arth_bZIP_p0m01R_632	MA0570.2	ABF1	1970	0.000	0.020
ipm_Arth_bZIP_p0m03F_76	MA1343.1	bZIP52	1926	0.000	0.246
ipm_Arth_bZIP_p0m03R_76	MA1343.1	bZIP52	1926	0.000	0.246
ipm_Arth_bZIP_p0m04F_71	MA1350.1	bZIP42	1910	0.000	0.559
ipm_Arth_bZIP_p0m04R_71	MA1350.1	bZIP42	1910	0.000	0.559
ipm_Arth_BZR_p0m00F_1235	MA0958.1	BHLH13	1987	0.001	1587
ipm_Arth_BZR_p0m00R_1235	MA0958.1	BHLH13	1987	0.001	1587
ipm_Arth_BZR_p0m01F_41	MA0096.1	bZIP910	1946	0.004	5513
ipm_Arth_BZR_p0m01R_41	MA0096.1	bZIP910	1946	0.004	5513
ipm_Arth_C2C2dof_p0m00F_1978	MA1271.1	DAG2	1989	0.000	0.006
ipm_Arth_C2C2dof_p0m00R_1978	MA1271.1	DAG2	1989	0.000	0.006
ipm_Arth_C2C2dof_p0m01F_144	MA0977.1	DOF2.5	1959	0.002	2908
ipm_Arth_C2C2dof_p0m01R_144	MA0977.1	DOF2.5	1959	0.002	2908
ipm_Arth_C2C2dof_p0m02F_54	MA1278.1	OBP1	1952	0.000	0.059
ipm_Arth_C2C2dof_p0m02R_54	MA1278.1	OBP1	1952	0.000	0.059
ipm_Arth_C2C2gata_p0m00F_1336	MA1323.1	GATA19	1934	0.000	0.171
ipm_Arth_C2C2gata_p0m00R_1336	MA1323.1	GATA19	1934	0.000	0.171
ipm_Arth_C2C2gata_p0m01F_577	MA1324.1	GATA20	1990	0.001	1477
ipm_Arth_C2C2gata_p0m01R_577	MA1324.1	GATA20	1990	0.001	1477
ipm_Arth_C2C2gata_p0m02F_231	MA1323.1	GATA19	1965	0.000	0.027
ipm_Arth_C2C2gata_p0m02R_231	MA1323.1	GATA19	1965	0.000	0.027
ipm_Arth_C2C2gata_p0m04F_90	MA1323.1	GATA19	1945	0.000	0.090
ipm_Arth_C2C2gata_p0m04R_90	MA1323.1	GATA19	1945	0.000	0.090
ipm_Arth_C2C2gata_p0m05F_55	MA1324.1	GATA20	1989	0.001	1523
ipm_Arth_C2C2gata_p0m05R_55	MA1324.1	GATA20	1989	0.001	1523
ipm_Arth_C2C2YABBY_p0m00F_100	MA1210.1	HAT22	1974	0.000	0.016
ipm_Arth_C2C2YABBY_p0m00R_100	MA1210.1	HAT22	1974	0.000	0.016
ipm_Arth_C2C2YABBY_p0m01F_46	MA1210.1	HAT22	1924	0.000	0.283
ipm_Arth_C2C2YABBY_p0m01R_46	MA1210.1	HAT22	1924	0.000	0.283
ipm_Arth_C2H2_p0m00F_953	MA1371.1	IDD4	1957	0.000	0.045
ipm_Arth_C2H2_p0m00R_953	MA1371.1	IDD4	1957	0.000	0.045
ipm_Arth_C2H2_p0m01F_220	MA1372.1	STZ	1886	0.001	1559
ipm_Arth_C2H2_p0m01R_220	MA1372.1	STZ	1886	0.001	1559
ipm_Arth_C2H2_p0m02F_56	MA1372.1	STZ	1913	0.000	0.467
ipm_Arth_C2H2_p0m02R_56	MA1372.1	STZ	1913	0.000	0.467
ipm_Arth_C2H2_p0m03F_37	MA1370.1	IDD5	1872	0.002	2721
ipm_Arth_C2H2_p0m03R_37	MA1370.1	IDD5	1872	0.002	2721
ipm_Arth_C2H2_p0m04F_37	MA1040.1	MYB46	1936	0.003	4580
ipm_Arth_C2H2_p0m04R_37	MA1040.1	MYB46	1936	0.003	4580
ipm_Arth_C3H_p0m00F_1635	MA1271.1	DAG2	1983	0.000	0.008
ipm_Arth_C3H_p0m00R_1635	MA1271.1	DAG2	1983	0.000	0.008
ipm_Arth_C3H_p0m01F_310	MA1173.1	MYB101	1879	0.001	2057
ipm_Arth_C3H_p0m01R_310	MA1173.1	MYB101	1879	0.001	2057
ipm_Arth_C3H_p0m02F_115	MA1275.1	AT1G47655	1985	0.000	0.008
ipm_Arth_C3H_p0m02R_115	MA1275.1	AT1G47655	1985	0.000	0.008
ipm_Arth_C3H_p0m03F_52	MA1278.1	OBP1	1941	0.000	0.115
ipm_Arth_C3H_p0m03R_52	MA1278.1	OBP1	1941	0.000	0.115
ipm_Arth_C3H_p0m04F_31	MA0977.1	DOF2.5	1949	0.002	3562
ipm_Arth_C3H_p0m04R_31	MA0977.1	DOF2.5	1949	0.002	3562
ipm_Arth_CAMTA_p0m00F_161	MA1382.1	FAR1	1942	0.000	0.109
ipm_Arth_CAMTA_p0m00R_161	MA1382.1	FAR1	1942	0.000	0.109
ipm_Arth_CPP_p0m00F_1073	MA1161.1	TSO1	1975	0.000	0.015
ipm_Arth_CPP_p0m00R_1073	MA1161.1	TSO1	1975	0.000	0.015
ipm_Arth_CPP_p0m01F_484	MA1682.1	TCX3	1956	0.000	0.048
ipm_Arth_CPP_p0m01R_484	MA1682.1	TCX3	1956	0.000	0.048
ipm_Arth_CPP_p0m02F_85	MA1162.1	TCX2	1883	0.001	1768
ipm_Arth_CPP_p0m02R_85	MA1162.1	TCX2	1883	0.001	1768
ipm_Arth_E2FDP_p0m00F_1079	MA0563.1	2003-09-01	1955	0.000	0.051
ipm_Arth_E2FDP_p0m00R_1079	MA0563.1	2003-09-01	1955	0.000	0.051
ipm_Arth_E2FDP_p0m01F_734	MA1414.1	E2FA	1950	0.000	0.067
ipm_Arth_E2FDP_p0m01R_734	MA1414.1	E2FA	1950	0.000	0.067
ipm_Arth_FAR1_p0m00F_218	MA1382.1	FAR1	1968	0.000	0.023
ipm_Arth_FAR1_p0m00R_218	MA1382.1	FAR1	1968	0.000	0.023
ipm_Arth_G2like_p0m00F_1864	MA1165.1	HHO6	1971	0.000	0.019
ipm_Arth_G2like_p0m00R_1864	MA1165.1	HHO6	1971	0.000	0.019
ipm_Arth_G2like_p0m01F_583	MA1028.1	KAN4	1989	0.001	1498
ipm_Arth_G2like_p0m01R_583	MA1028.1	KAN4	1989	0.001	1498
ipm_Arth_GeBP_p0m00F_1585	MA1400.1	At1g19000	1976	0.000	0.013
ipm_Arth_GeBP_p0m00R_1585	MA1400.1	At1g19000	1976	0.000	0.013
ipm_Arth_HB_p0m00F_1590	MA0951.1	ATHB-16	1954	0.002	3197
ipm_Arth_HB_p0m00R_1590	MA0951.1	ATHB-16	1954	0.002	3197
ipm_Arth_Homeobox_p0m00F_1548	MA0952.1	ATHB-51	1977	0.001	1976
ipm_Arth_Homeobox_p0m00R_1548	MA0952.1	ATHB-51	1977	0.001	1976
ipm_Arth_HSF_p0m00F_1404	MA1666.1	HSFB2B	1986	0.000	0.007
ipm_Arth_HSF_p0m00R_1404	MA1666.1	HSFB2B	1986	0.000	0.007
ipm_Arth_LOBAS2_p0m00F_1286	MA1673.1	LBD18	1914	0.000	0.447
ipm_Arth_LOBAS2_p0m00R_1286	MA1673.1	LBD18	1914	0.000	0.447
ipm_Arth_LOBAS2_p0m01F_294	MA0548.2	AGL15	1901	0.001	0.811
ipm_Arth_LOBAS2_p0m01R_294	MA0548.2	AGL15	1901	0.001	0.811
ipm_Arth_LOBAS2_p0m02F_238	MA0994.1	ERF8	1857	0.003	4782
ipm_Arth_LOBAS2_p0m02R_238	MA0994.1	ERF8	1857	0.003	4782
ipm_Arth_LOBAS2_p0m03F_95	MA1257.1	ERF9	1974	0.000	0.016
ipm_Arth_LOBAS2_p0m03R_95	MA1257.1	ERF9	1974	0.000	0.016
ipm_Arth_mTERF_p0m00F_1327	MA1228.1	AT4G18450	1985	0.000	0.007
ipm_Arth_mTERF_p0m00R_1327	MA1228.1	AT4G18450	1985	0.000	0.007
ipm_Arth_mTERF_p0m01F_49	MA0993.1	ERF7	1906	0.000	0.648
ipm_Arth_mTERF_p0m01R_49	MA0993.1	ERF7	1906	0.000	0.648
ipm_Arth_MYB_p0m00F_789	MA1293.1	MYB57	1960	0.000	0.038
ipm_Arth_MYB_p0m00R_789	MA1293.1	MYB57	1960	0.000	0.038
ipm_Arth_MYB_p0m01F_573	MA1039.1	MYB4	1963	0.002	2625
ipm_Arth_MYB_p0m01R_573	MA1039.1	MYB4	1963	0.002	2625
ipm_Arth_MYB_p0m03F_190	MA1177.1	MYB65	1976	0.000	0.014
ipm_Arth_MYB_p0m03R_190	MA1177.1	MYB65	1976	0.000	0.014
ipm_Arth_MYB_p0m05F_64	MA1393.2	MYB70	1928	0.000	0.228
ipm_Arth_MYB_p0m05R_64	MA1393.2	MYB70	1928	0.000	0.228
ipm_Arth_MYB_p0m06F_49	MA1039.1	MYB4	1899	0.006	9365
ipm_Arth_MYB_p0m06R_49	MA1039.1	MYB4	1899	0.006	9365
ipm_Arth_MYBrelated_p0m00F_1226	MA1353.1	AT1G72740	1962	0.000	0.033
ipm_Arth_MYBrelated_p0m00R_1226	MA1353.1	AT1G72740	1962	0.000	0.033
ipm_Arth_MYBrelated_p0m01F_322	MA1030.1	P0510F09.23	1867	0.002	3325
ipm_Arth_MYBrelated_p0m01R_322	MA1030.1	P0510F09.23	1867	0.002	3325
ipm_Arth_MYBrelated_p0m02F_129	MA1195.1	AT5G56840	1977	0.000	0.013
ipm_Arth_MYBrelated_p0m02R_129	MA1195.1	AT5G56840	1977	0.000	0.013
ipm_Arth_MYBrelated_p0m03F_90	MA0972.1	CCA1	1993	0.001	1399
ipm_Arth_MYBrelated_p0m03R_90	MA0972.1	CCA1	1993	0.001	1399
ipm_Arth_MYBrelated_p0m04F_46	MA1352.1	TRP1	1996	0.000	0.003
ipm_Arth_MYBrelated_p0m04R_46	MA1352.1	TRP1	1996	0.000	0.003
ipm_Arth_NAC_p0m00F_932	MA1663.1	ANAC050	1915	0.000	0.433
ipm_Arth_NAC_p0m00R_932	MA1663.1	ANAC050	1915	0.000	0.433
ipm_Arth_NAC_p0m01F_905	MA0939.1	NAC080	1961	0.002	2774
ipm_Arth_NAC_p0m01R_905	MA0939.1	NAC080	1961	0.002	2774
ipm_Arth_NAC_p0m02F_80	MA1196.1	At5g05790	1841	0.005	7928
ipm_Arth_NAC_p0m02R_80	MA1196.1	At5g05790	1841	0.005	7928
ipm_Arth_ND_p0m00F_468	MA1403.1	BPC5	1998	0.000	0.003
ipm_Arth_ND_p0m00R_468	MA1403.1	BPC5	1998	0.000	0.003
ipm_Arth_ND_p0m01F_375	MA1404.1	BPC1	1923	0.000	0.297
ipm_Arth_ND_p0m01R_375	MA1404.1	BPC1	1923	0.000	0.297
ipm_Arth_Orphan_p0m00F_1586	MA1271.1	DAG2	1986	0.000	0.007
ipm_Arth_Orphan_p0m00R_1586	MA1271.1	DAG2	1986	0.000	0.007
ipm_Arth_Orphan_p0m01F_197	MA1281.1	AT5G02460	1975	0.000	0.015
ipm_Arth_Orphan_p0m01R_197	MA1281.1	AT5G02460	1975	0.000	0.015
ipm_Arth_Orphan_p0m02F_134	MA0973.1	CDF2	1944	0.000	0.095
ipm_Arth_Orphan_p0m02R_134	MA0973.1	CDF2	1944	0.000	0.095
ipm_Arth_Orphan_p0m03F_111	MA1274.1	OBP3	1939	0.000	0.126
ipm_Arth_Orphan_p0m03R_111	MA1274.1	OBP3	1939	0.000	0.126
ipm_Arth_Orphan_p0m04F_99	MA1278.1	OBP1	1974	0.000	0.016
ipm_Arth_Orphan_p0m04R_99	MA1278.1	OBP1	1974	0.000	0.016
ipm_Arth_REM_p0m00F_978	MA1281.1	AT5G02460	1878	0.001	2173
ipm_Arth_REM_p0m00R_978	MA1281.1	AT5G02460	1878	0.001	2173
ipm_Arth_S1Falike_p0m00F_1169	MA1667.1	HSFC1	1991	0.000	0.005
ipm_Arth_S1Falike_p0m00R_1169	MA1667.1	HSFC1	1991	0.000	0.005
ipm_Arth_SBP_p0m00F_1742	MA0577.2	SPL3	1984	0.001	1697
ipm_Arth_SBP_p0m00R_1742	MA0577.2	SPL3	1984	0.001	1697
ipm_Arth_SBP_p0m01F_54	MA0940.1	AP1	1892	0.001	1230
ipm_Arth_SBP_p0m01R_54	MA0940.1	AP1	1892	0.001	1230
ipm_Arth_SRS_p0m00F_1442	MA1030.1	P0510F09.23	1916	0.000	0.411
ipm_Arth_SRS_p0m00R_1442	MA1030.1	P0510F09.23	1916	0.000	0.411
ipm_Arth_SRS_p0m01F_321	MA1030.1	P0510F09.23	1871	0.002	2857
ipm_Arth_SRS_p0m01R_321	MA1030.1	P0510F09.23	1871	0.002	2857
ipm_Arth_SRS_p0m02F_193	MA1030.1	P0510F09.23	1897	0.001	0.994
ipm_Arth_SRS_p0m02R_193	MA1030.1	P0510F09.23	1897	0.001	0.994
ipm_Arth_SRS_p0m05F_105	MA1030.1	P0510F09.23	1919	0.000	0.357
ipm_Arth_SRS_p0m05R_105	MA1030.1	P0510F09.23	1919	0.000	0.357
ipm_Arth_Trihelix_p0m00F_1528	MA1266.1	RAP211	1903	0.001	0.758
ipm_Arth_Trihelix_p0m00R_1528	MA1266.1	RAP211	1903	0.001	0.758
ipm_Arth_Trihelix_p0m01F_186	MA1034.1	Os05g0497200	1920	0.004	6268
ipm_Arth_Trihelix_p0m01R_186	MA1034.1	Os05g0497200	1920	0.004	6268
ipm_Arth_Trihelix_p0m02F_150	MA1244.1	ABR1	1885	0.001	1650
ipm_Arth_Trihelix_p0m02R_150	MA1244.1	ABR1	1885	0.001	1650
ipm_Arth_Trihelix_p0m03F_32	MA1246.1	LEP	1879	0.001	2116
ipm_Arth_Trihelix_p0m03R_32	MA1246.1	LEP	1879	0.001	2116
ipm_Arth_Trihelix_p0m04F_30	MA1023.1	PHYPADRAFT_28324	1911	0.005	7482
ipm_Arth_Trihelix_p0m04R_30	MA1023.1	PHYPADRAFT_28324	1911	0.005	7482
ipm_Arth_WRKY_p0m00F_1789	MA1080.1	WRKY23	1992	0.001	1426
ipm_Arth_WRKY_p0m00R_1789	MA1080.1	WRKY23	1992	0.001	1426
ipm_Arth_zfGRF_p0m00F_549	MA1080.1	WRKY23	1984	0.001	1702
ipm_Arth_zfGRF_p0m00R_549	MA1080.1	WRKY23	1984	0.001	1702
ipm_Arth_ZFHD_p0m00F_767	MA1327.2	ATHB23	1963	0.000	0.031
ipm_Arth_ZFHD_p0m00R_767	MA1327.2	ATHB23	1963	0.000	0.031
ipm_Arth_ZFHD_p0m01F_90	MA1328.1	ATHB34	1945	0.000	0.089
ipm_Arth_ZFHD_p0m01R_90	MA1328.1	ATHB34	1945	0.000	0.089
