# Supplementary material for: Modelling genetic variation effects in plant gene regulatory networks using transfer learning on genomic and transcription factor binding data
Source: Research Square preprint supplement (doi:10.21203/rs.3.rs-6247751/v1), 2025-04-10
Supplement: Supplementary file 4 [file 50ef0f8d532059ef9c2ef5c4.xlsx]

## Sheet: Sheet1
Supplementary table 4 - Evaluation of importance of interaction predictive motifs
column_name	total_IPM_matches_count	total_count_of_predicted_binding_per_window	predicted_binding_count	IPMciv	motif_redundancy_value	true_binding_count	true_per_total_extracted	TDR_IPM	FPFN_IPM_plus_binding_prediction	Sensitivity
ABI3VP1_tnt	51499	144107	10814	0.790015	2.79825	1862	5260	0.102138	0.172184	0.167426
AP2EREBP_tnt	53669	62554	33552	0.374835	1.16555	24386	10271	0.191377	0.726812	0.887987
ARF_ecoli	0	0	0	0	0	1137	0	0	0	0.370156
ARF_tnt	60942	76553	13	0.999787	1.25616	24	3638	0.0596961	1.84615	0.00317488
ARID_tnt	19315	26791	1169	0.939477	1.38706	218	1054	0.054569	0.186484	0.321633
BBRBPC_tnt	61508	61508	32337	0.474264	1	4145	3431	0.0557814	0.128181	0.73617
BES1_tnt	13735	13913	578	0.957918	1.01296	594	2074	0.151001	1.02768	0.517557
bHLH_tnt	37775	38193	9898	0.737975	1.01107	8843	9657	0.255645	0.893413	0.689519
bZIP_tnt	75503	93628	18818	0.750765	1.24006	13658	6435	0.0852284	0.725794	0.796008
BZR_tnt	31743	34897	1892	0.940396	1.09936	1684	4285	0.13499	0.890063	0.718109
C2C2dof_tnt	8268	9770	1902	0.769956	1.18166	5190	773	0.093493	2.72871	0.914801
C2C2gata_tnt	46159	55433	7849	0.829957	1.20091	2928	939	0.0203427	0.373041	0.710741
C2C2YABBY_tnt	24776	25141	1393	0.943776	1.01473	267	790	0.0318857	0.191673	0.0650469
C2H2_tnt	93840	130731	6727	0.928314	1.39313	2049	5770	0.0614876	0.304593	0.378631
C3H_tnt	21180	23898	588	0.972238	1.12833	1231	1311	0.061898	2.09354	0.497231
CAMTA_tnt	9861	10795	157	0.984079	1.09472	149	1715	0.173917	0.949045	0.0654074
CPP_tnt	29137	35802	4912	0.831417	1.22875	1542	1869	0.0641452	0.313925	0.858397
E2FDP_tnt	21479	22861	1289	0.939988	1.06434	587	3793	0.176591	0.455392	0.570339
EIL_tnt	0	0	0	0	0	0	0	0	0	0
FAR1_tnt	17533	18264	352	0.979924	1.04169	352	2009	0.114584	1	0.360502
G2like_tnt	5718	6474	1081	0.810948	1.13221	3317	383	0.0669815	3.06846	0.862862
GeBP_tnt	10263	10263	185	0.981974	1	258	326	0.0317646	1.39459	0.386391
GRF_tnt	13300	13300	0	1	1	0	2082	0.156541	0	0.0252781
HB_tnt	158699	201958	14483	0.908739	1.27259	3246	16420	0.103466	0.224125	0.883733
Homeobox_ecoli	0	0	0	0	0	568	0	0	0	0.418326
Homeobox_tnt	603	603	118	0.804312	1	2050	24	0.039801	17.3729	0.685333
HSF_tnt	4354	4354	944	0.783188	1	2031	94	0.0215893	2.15148	0.722393
LOBAS2_tnt	97802	121023	36085	0.63104	1.23743	14725	12942	0.132329	0.408064	0.723478
MADS_tnt	0	0	0	0	0	0	0	0	0	0
mTERF_tnt	65636	84882	10349	0.842327	1.29322	6481	15039	0.229127	0.626244	0.460277
MYB_tnt	86083	122566	18745	0.782245	1.42381	10981	3674	0.0426797	0.58581	0.787135
MYBrelated_tnt	46932	68511	16273	0.653264	1.45979	5886	1124	0.0239495	0.361703	0.832279
NAC_tnt	21398	22144	4173	0.804982	1.03486	11438	1217	0.0568745	2.74095	0.739563
ND_tnt	98628	138751	13450	0.863629	1.40681	1296	4783	0.0484954	0.0963569	0.281161
Orphan_tnt	55036	76186	2700	0.950941	1.38429	1273	5455	0.0991169	0.471481	0.484638
RAV_tnt	0	0	0	0	0	0	0	0	0	0
REM_tnt	91544	133390	25249	0.724187	1.45711	4982	14950	0.163309	0.197315	0.713765
RWPRK_tnt	0	0	0	0	0	0	0	0	0	0
S1Falike_tnt	6293	6293	178	0.971715	1	496	192	0.0305101	2.78652	0.407009
SBP_tnt	9811	9893	993	0.898787	1.00836	2186	511	0.0520844	2.20141	0.773788
SRS_tnt	27095	32439	5428	0.799668	1.19723	686	751	0.0277173	0.126382	0.434195
TCP_tnt	0	0	0	0	0	0	0	0	0	0
Trihelix_tnt	76492	128379	19243	0.748431	1.67833	9505	16523	0.21601	0.493946	0.534575
WRKY_tnt	9517	9517	2454	0.742146	1	5138	1379	0.144899	2.09372	0.863316
zfGRF_tnt	13300	13300	171	0.987143	1	294	2082	0.156541	1.7193	0.434369
ZFHD_tnt	2545	2560	762	0.700589	1.00589	1829	65	0.0255403	2.40026	0.828161
