# Supplementary material for: Modelling genetic variation effects in plant gene regulatory networks using transfer learning on genomic and transcription factor binding data
Source: Research Square preprint supplement (doi:10.21203/rs.3.rs-6247751/v1), 2025-04-10
Supplement: Supplementary file 5 [file 5f1a1358a468ded583ba25ef.xlsx]

## Sheet: model performance mult-label cl
Supplementary table 1 - Performance of models built on the s-baseline and d-baseline shuffled sequences
score	model type	metric	region
0.899932	model	auROC	promoter
0.556945	model	auPR	promoter
0.681824	model	weighted auPR	promoter
0.764541	baseline-di	auROC	promoter
0.206124	baseline-di	auPR	promoter
0.297883	baseline-di	weighted auPR	promoter
0.669496	baseline-si	auROC	promoter
0.136841	baseline-si	auPR	promoter
0.216442	baseline-si	weighted auPR	promoter
0.899455	model	auROC	promoter
0.558253	model	auPR	promoter
0.690986	model	weighted auPR	promoter
0.756788	baseline-di	auROC	promoter
0.204277	baseline-di	auPR	promoter
0.295715	baseline-di	weighted auPR	promoter
0.670874	baseline-si	auROC	promoter
0.136504	baseline-si	auPR	promoter
0.215321	baseline-si	weighted auPR	promoter
0.901649	model	auROC	promoter
0.556904	model	auPR	promoter
0.680711	model	weighted auPR	promoter
0.761194	baseline-di	auROC	promoter
0.201405	baseline-di	auPR	promoter
0.293486	baseline-di	weighted auPR	promoter
0.66136	baseline-si	auROC	promoter
0.12757	baseline-si	auPR	promoter
0.207924	baseline-si	weighted auPR	promoter
0.900815	model	auROC	promoter
0.567461	model	auPR	promoter
0.694521	model	weighted auPR	promoter
0.752894	baseline-di	auROC	promoter
0.198699	baseline-di	auPR	promoter
0.293522	baseline-di	weighted auPR	promoter
0.656771	baseline-si	auROC	promoter
0.12869	baseline-si	auPR	promoter
0.210713	baseline-si	weighted auPR	promoter
0.893305	model	auROC	promoter
0.543368	model	auPR	promoter
0.682163	model	weighted auPR	promoter
0.757459	baseline-di	auROC	promoter
0.197709	baseline-di	auPR	promoter
0.289459	baseline-di	weighted auPR	promoter
0.665904	baseline-si	auROC	promoter
0.135243	baseline-si	auPR	promoter
0.215243	baseline-si	weighted auPR	promoter
0.190383	baseline-di	auPR	genome
0.756826	baseline-di	auROC	genome
0.276801	baseline-di	weighted auPR	genome
0.539139	model	auPR	genome
0.898722	model	auROC	genome
0.673005	model	weighted auPR	genome
0.12599	baseline-si	auPR	genome
0.668697	baseline-si	auROC	genome
0.201763	baseline-si	weighted auPR	genome
0.193038	baseline-di	auPR	genome
0.761673	baseline-di	auROC	genome
0.281025	baseline-di	weighted auPR	genome
0.185746	baseline-di	auPR	genome
0.757033	baseline-di	auROC	genome
0.27228	baseline-di	weighted auPR	genome
0.119093	baseline-si	auPR	genome
0.656764	baseline-si	auROC	genome
0.194565	baseline-si	weighted auPR	genome
0.538066	model	auPR	genome
0.900039	model	auROC	genome
0.663266	model	weighted auPR	genome
0.118966	baseline-si	auPR	genome
0.660663	baseline-si	auROC	genome
0.194461	baseline-si	weighted auPR	genome
0.191219	baseline-di	auPR	genome
0.760446	baseline-di	auROC	genome
0.278402	baseline-di	weighted auPR	genome
0.125035	baseline-si	auPR	genome
0.669769	baseline-si	auROC	genome
0.199239	baseline-si	weighted auPR	genome
0.187836	baseline-di	auPR	genome
0.753578	baseline-di	auROC	genome
0.274508	baseline-di	weighted auPR	genome
0.548484	model	auPR	genome
0.90018	model	auROC	genome
0.676758	model	weighted auPR	genome
0.540061	model	auPR	genome
0.898546	model	auROC	genome
0.66771	model	weighted auPR	genome
0.527157	model	auPR	genome
0.892503	model	auROC	genome
0.66745	model	weighted auPR	genome
0.124076	baseline-si	auPR	genome
0.665967	baseline-si	auROC	genome
0.199631	baseline-si	weighted auPR	genome
