# Supplementary material for: Modelling genetic variation effects in plant gene regulatory networks using transfer learning on genomic and transcription factor binding data
Source: Research Square preprint supplement (doi:10.21203/rs.3.rs-6247751/v1), 2025-04-10
Supplement: Supplementary file 6 [file a0ab13176dd7d66f327e4ed3.xlsx]

## Sheet: Tabellenblatt1
Supplementary table 6 - Promoter and terminator TF family binding profiles
[%]	ABI3VP1	AP2EREBP	ARF_ecoli	ARF	ARID	BBRBPC	BES1	BZR	C2C2YABBY	C2C2dof	C2C2gata	C2H2	C3H	CAMTA	CPP	E2FDP	EIL	FAR1	G2like	GRF	GeBP	HB	HSF	Homeobox_ecoli	Homeobox	LOBAS2	MADS	MYB	MYBrelated	NAC	ND	Orphan	RAV	REM	RWPRK	S1Falike	SBP	SRS	TCP	Trihelix	WRKY	ZFHD	bHLH	bZIP	mTERF	zfGRF
-	0.00372185	0.0598794	0.0142278	0	0.00244983	0.011778	0.00146047	0.0126731	4.71e-05	0.0622821	0.0219071	0.0194573	0.0192688	0.00805616	0.0291152	0.00532366	0	0.0074437	0.0473005	0.00325073	0.00334495	0.0591727	0.017243	0.00701969	0.0355225	0.0360407	0	0.0783002	0.0829643	0.0562047	0.00136625	0.0181381	0	0.0236502	0	0.0023556	0.0245454	0.0154056	0	0.0289268	0.0411759	0.0482898	0.0443324	0.0448035	0.00122491	0.000329784
c1-bHLH-bZIP-BZR-ZFHD	0.00450344	0.061626	0.0107549	0	0.00165916	0.0166805	0.0385459	0.0441752	2.96e-05	0.0545745	0.0162953	0.0217172	0.0115252	0	0.0203247	0.00245911	0	0	0.0460121	0	0.00343683	0.0487675	0.0178952	0.0036146	0.028028	0.0294205	0	0.0757288	0.0753141	0.0541005	0.00260725	0.0100438	0	0.0222802	0	0.00420716	0.0219839	0.00500711	0	0.0293909	0.0370645	0.0411235	0.0709588	0.0649443	0.00319981	0
c2-WRKY-bZIP-ZFHD-zfGRF	0.00409541	0.0624212	0.00976598	0	0.00310531	0.0131863	0.00180018	0.00675068	0	0.0590909	0.0179568	0.0236274	0.0138164	0	0.0309181	0.00238524	0	4.5e-05	0.0505851	0	0.00319532	0.0509451	0.0163816	0.00351035	0.0281728	0.029973	0	0.0836184	0.0779028	0.0550855	0.0020252	0.0112961	0	0.0229073	0	0.00279028	0.0228623	0.00576058	0	0.0289829	0.0860486	0.0440144	0.0368137	0.0445995	0.00324032	0.040324
c3-ZFHD-Homeobox-bZIP-bHLH	0.00433789	0.0587714	0.011008	0.00153925	0.00228555	0.016372	0.00303186	0.00708988	0.0266803	0.0497225	0.0212696	0.0201502	0.0119409	0	0.0179113	0.00685666	0	0.00872242	0.0417464	0	0.00401138	0.0798078	0.016372	0.0191707	0.0562526	0.0284528	0	0.0772891	0.0833994	0.0555063	0.00293857	0.0100285	0	0.0218294	0	0.00359159	0.0197304	0.00671673	0	0.0251877	0.0344699	0.059611	0.0378749	0.0435188	0.00377816	0.00102617
c4-E2FDP-bZIP-ZFHD-WRKY	0.00608337	0.0611141	0.0109613	0	0.00224272	0.0154467	2.8e-05	0.00316784	0	0.0653752	0.0184464	0.024726	0.0126433	0	0.0296599	0.0473494	0	0	0.0580303	0	0.00285947	0.0529281	0.0211937	0.00358835	0.0290993	0.0333044	0	0.0966051	0.0901292	0.0517788	8.41e-05	0.0109893	0	0.0260996	0	0.00316784	0.0234925	0.00731687	0	0.0287909	0.0430041	0.0433966	0.0324633	0.0443217	0.000112136	0
c5-bZIP-LOBAS2-Trihelix-mTERF	0.00360415	0.0992885	0.0103241	0	0.0018137	0.0134865	0	0.00392968	0	0.0530856	0.018323	0.0215551	0.0118588	0	0.0214621	0.00253453	0	0	0.045575	0	0.00339488	0.0463191	0.018509	0.00332512	0.0253686	0.0532251	0	0.0900339	0.076501	0.065177	2.33e-05	0.00899874	0	0.0209041	0	0.0031391	0.0227643	0.00546435	0	0.0434125	0.036646	0.0369716	0.0368553	0.0554109	0.0407152	0
c6-GeBP-ZFHD-WRKY-bZIP	0.00482412	0.052038	0.0113456	0	0.000558347	0.0136683	0	0.00355109	0	0.0638749	0.0183361	0.026555	0.0140257	0	0.0232049	0.000156337	0	0	0.0550307	0	0.0465215	0.0585595	0.0159687	0.0025684	0.0325628	0.024746	0	0.0851591	0.132418	0.0608822	2.23e-05	0.0111669	0	0.0242323	0	0.000178671	0.0239196	0.00661083	0	0.0250363	0.0423227	0.0464768	0.0332328	0.0401563	8.93e-05	0
c7-ZFHD-BBRBPC-ND-bZIP	0.00531289	0.0552079	0.0115078	0	0.00760185	0.052331	2.1e-05	0.00350693	0	0.0611088	0.0175976	0.0224486	0.0120328	0	0.0275094	0.00220496	0	0	0.050357	0	0.00417892	0.0583368	0.0169887	0.00623688	0.0345233	0.0283704	0	0.0771735	0.0871903	0.0526039	0.0419362	0.0112978	0	0.0306804	0	0.00335993	0.0223016	0.00560689	0	0.0253465	0.0381142	0.0535069	0.0301134	0.0400882	0.00327593	2.1e-05
c8-ZFHD-CPP-Homeobox-ARID	0.00511528	0.0430968	0.00929152	2.47e-05	0.0452467	0.0114414	2.47e-05	0.00318778	0	0.054044	0.017298	0.0182371	0.00857489	0	0.0624954	0.000963748	0	0	0.0480639	0	0.0027924	0.0809549	0.0130477	0.0219191	0.0508563	0.0223145	0	0.0687227	0.0974127	0.040082	2.47e-05	0.0083772	0	0.0319272	0	0.000716633	0.0170015	0.00556009	0	0.0254281	0.0374626	0.0920997	0.0257494	0.0299998	0.000444807	0
c9-HSF-S1Falike-WRKY-bZIP	0.00425865	0.056926	0.0114798	0	0.00156356	0.0139898	0	0.00331228	0	0.058757	0.0211081	0.0266628	0.0132903	0	0.0243175	0.000370317	0	0	0.065937	0	0.00382661	0.0512272	0.064394	0.00322999	0.028967	0.0287201	0	0.0836094	0.0892464	0.0590038	4.11e-05	0.0103483	0	0.0225482	0	0.0455696	0.0224453	0.00594565	0	0.0232271	0.0425247	0.0395416	0.0325468	0.0410023	6.17e-05	0
c10-Homeobox-ZFHD-Homeobox_ecoli-WRKY	0.000564222	0.0457351	0.00999004	0	3.32e-05	0.0125456	0	0.00229008	0	0.0559243	0.0193163	0.0196482	0.00909393	0	0.0296714	6.64e-05	0	0	0.0495519	0	0.000232327	0.107866	0.0137405	0.0440757	0.0805178	0.0229671	0	0.0735148	0.0939595	0.0486226	3.32e-05	0.00806505	0	0.024693	0	3.32e-05	0.0207434	0.00826419	0	0.0216728	0.0386326	0.0796216	0.0255891	0.0326585	6.64e-05	0
c11-REM-ZFHD-ABI3VP1-WRKY	0.0461875	0.0513083	0.0128321	2.01e-05	0.000100408	0.0131534	0	0.00345402	0	0.0747234	0.016748	0.022411	0.0136554	0	0.0284354	8.03e-05	0	0	0.0535775	0	0.000321304	0.0583368	0.0133743	0.00285158	0.0319698	0.0242786	0	0.0804868	0.0910497	0.0532763	4.02e-05	0.0163062	0	0.0745828	0	6.02e-05	0.021909	0.00542201	0	0.0287768	0.0414884	0.0498624	0.0311665	0.0377332	2.01e-05	0
c12-SRS-WRKY-bZIP-ZFHD	0.000284083	0.0618448	0.0130962	0	5.68e-05	0.0161927	2.84e-05	0.000596574	0	0.0642027	0.0201131	0.0315332	0.00985767	0	0.019346	5.68e-05	0	0	0.0547712	2.84e-05	0.000198858	0.0525837	0.0202551	8.52e-05	0.0254822	0.0375273	0	0.0986336	0.109003	0.0689185	2.84e-05	0.00553962	0	0.0180393	0	8.52e-05	0.0244311	0.0609074	0	0.0235789	0.051419	0.0383228	0.0319593	0.0409079	8.52e-05	0
c13-WRKY-bZIP-ZFHD-bHLH	4.14e-05	0.0630117	0.0131836	0	6.4e-05	0.0158075	0	0.000176936	0	0.0707329	0.0218422	0.0322174	0.0155741	0	0.0333957	2.26e-05	0	0	0.0694718	3.76e-06	5.27e-05	0.0584491	0.0197792	0.000150584	0.0306701	0.0301582	0	0.0954512	0.0978418	0.0619087	3.76e-06	0.0121596	0	0.0234271	0	1.51e-05	0.026258	0.000621158	0	0.0303577	0.0517857	0.0451939	0.0347359	0.0454123	2.26e-05	0
c14-bHLH-bZIP-WRKY-BZR	0.000188359	0.0642682	0.00975702	0	0.000150688	0.0133358	0	0.0450932	0	0.0579017	0.0166886	0.0247128	0.0120927	0	0.0249011	0.000113016	0	0	0.0545866	0	0.000113016	0.0535317	0.0138633	0.000339047	0.0287813	0.0296478	0	0.0942174	0.0811076	0.0550386	0	0.00832549	0	0.0184592	0	7.53e-05	0.0255039	0.0038802	0	0.0280279	0.0467131	0.0424562	0.0759842	0.070145	0	0
