# Supplementary material for: Modelling genetic variation effects in plant gene regulatory networks using transfer learning on genomic and transcription factor binding data
Source: Research Square preprint supplement (doi:10.21203/rs.3.rs-6247751/v1), 2025-04-10
Supplement: Supplementary file 7 [file d0c948d11d6d6f696d323898.xlsx]

## Sheet: Sheet1
Supplementary table 5 - Statistical analyses of co-occurrences of interaction predictive motifs and expression predictive motifs
label	factor	p_value	odds_ratio
epm_Arth_S0_p0m01	ABI3VP1_tnt	1.30793e-05	0.114609
epm_Arth_S0_p0m02	ABI3VP1_tnt	2.92041e-09	0
epm_Arth_S0_p0m03	ABI3VP1_tnt	0.00761418	0.31996
epm_Arth_S0_p0m04	ABI3VP1_tnt	0.00111396	4.05129
epm_Arth_S0_p0m05	ABI3VP1_tnt	0.0229506	0.384272
epm_Arth_S0_p0m06	ABI3VP1_tnt	9.05262e-08	0.0352536
epm_Arth_S0_p0m07	ABI3VP1_tnt	9.13195e-05	0.15942
epm_Arth_S0_p0m08	ABI3VP1_tnt	1.35605e-06	0.0733257
epm_Arth_S0_p0m09	ABI3VP1_tnt	1.30793e-05	0.114609
epm_Arth_S0_p0m10	ABI3VP1_tnt	1.30793e-05	0.114609
epm_Arth_S0_p0m11	ABI3VP1_tnt	0.260833	0.622219
epm_Arth_S0_p0m12	ABI3VP1_tnt	0.454377	0.720941
epm_Arth_S0_p0m13	ABI3VP1_tnt	1.35605e-06	0.0733257
epm_Arth_S0_p1m01	ABI3VP1_tnt	0.454377	0.720941
epm_Arth_S0_p1m02	ABI3VP1_tnt	0.00212963	0.261556
epm_Arth_S0_p1m03	ABI3VP1_tnt	0.0229506	0.384272
epm_Arth_S0_p1m04	ABI3VP1_tnt	0.0229506	0.384272
epm_Arth_S0_p1m05	ABI3VP1_tnt	0.000492007	0.208228
epm_Arth_S0_p1m06	ABI3VP1_tnt	0.454377	0.720941
epm_Arth_S0_p1m07	ABI3VP1_tnt	0.0592506	0.45535
epm_Arth_S0_p1m08	ABI3VP1_tnt	1	0.959153
epm_Arth_S0_p1m09	ABI3VP1_tnt	0.260833	0.622219
epm_Arth_S0_p1m10	ABI3VP1_tnt	0.0592506	0.45535
epm_Arth_S0_p1m13	ABI3VP1_tnt	0.000492007	0.208228
epm_Arth_S0_p1m14	ABI3VP1_tnt	0.454377	0.720941
epm_Arth_S0_p0m00	ARF_tnt	1	0
epm_Arth_S0_p0m01	ARF_tnt	1	0
epm_Arth_S0_p0m02	ARF_tnt	1	0
epm_Arth_S0_p0m03	ARF_tnt	1	0
epm_Arth_S0_p0m04	ARF_tnt	1	0
epm_Arth_S0_p0m05	ARF_tnt	1	0
epm_Arth_S0_p0m06	ARF_tnt	1	0
epm_Arth_S0_p0m07	ARF_tnt	1	0
epm_Arth_S0_p0m08	ARF_tnt	1	0
epm_Arth_S0_p0m09	ARF_tnt	1	0
epm_Arth_S0_p0m10	ARF_tnt	1	0
epm_Arth_S0_p0m11	ARF_tnt	1	0
epm_Arth_S0_p0m12	ARF_tnt	1	0
epm_Arth_S0_p0m13	ARF_tnt	1	0
epm_Arth_S0_p1m00	ARF_tnt	0.00291068	45.3135
epm_Arth_S0_p1m01	ARF_tnt	1	0
epm_Arth_S0_p1m02	ARF_tnt	1	0
epm_Arth_S0_p1m03	ARF_tnt	1	0
epm_Arth_S0_p1m04	ARF_tnt	1	0
epm_Arth_S0_p1m05	ARF_tnt	1	0
epm_Arth_S0_p1m06	ARF_tnt	1	0
epm_Arth_S0_p1m07	ARF_tnt	1	0
epm_Arth_S0_p1m08	ARF_tnt	1	0
epm_Arth_S0_p1m09	ARF_tnt	1	0
epm_Arth_S0_p1m10	ARF_tnt	1	0
epm_Arth_S0_p1m11	ARF_tnt	0.00291068	45.3135
epm_Arth_S0_p1m12	ARF_tnt	1	0
epm_Arth_S0_p1m13	ARF_tnt	1	0
epm_Arth_S0_p1m14	ARF_tnt	1	0
epm_Arth_S0_p0m00	ARID_tnt	1.60806e-25	234.925
epm_Arth_S0_p0m01	ARID_tnt	0.0412221	0
epm_Arth_S0_p0m02	ARID_tnt	0.0412221	0
epm_Arth_S0_p0m03	ARID_tnt	0.163941	0.244547
epm_Arth_S0_p0m04	ARID_tnt	0.163941	0.244547
epm_Arth_S0_p0m05	ARID_tnt	0.0412221	0
epm_Arth_S0_p0m06	ARID_tnt	0.0412221	0
epm_Arth_S0_p0m07	ARID_tnt	0.163941	0.244547
epm_Arth_S0_p0m08	ARID_tnt	0.163941	0.244547
epm_Arth_S0_p0m09	ARID_tnt	0.568397	0.510761
epm_Arth_S0_p0m10	ARID_tnt	0.163941	0.244547
epm_Arth_S0_p0m11	ARID_tnt	0.163941	0.244547
epm_Arth_S0_p0m12	ARID_tnt	0.0412221	0
epm_Arth_S0_p0m13	ARID_tnt	0.0412221	0
epm_Arth_S0_p1m01	ARID_tnt	0.163941	0.244547
epm_Arth_S0_p1m02	ARID_tnt	0.0412221	0
epm_Arth_S0_p1m03	ARID_tnt	1	0.801207
epm_Arth_S0_p1m04	ARID_tnt	0.163941	0.244547
epm_Arth_S0_p1m05	ARID_tnt	0.0412221	0
epm_Arth_S0_p1m06	ARID_tnt	0.0412221	0
epm_Arth_S0_p1m07	ARID_tnt	0.0412221	0
epm_Arth_S0_p1m08	ARID_tnt	0.0412221	0
epm_Arth_S0_p1m09	ARID_tnt	0.0412221	0
epm_Arth_S0_p1m10	ARID_tnt	0.776993	1.11884
epm_Arth_S0_p1m11	ARID_tnt	6.07004e-14	20.8226
epm_Arth_S0_p1m12	ARID_tnt	1.89577e-23	112.327
epm_Arth_S0_p1m13	ARID_tnt	0.0412221	0
epm_Arth_S0_p1m14	ARID_tnt	0.0412221	0
epm_Arth_S0_p0m00	BES1_tnt	0.840068	0.821837
epm_Arth_S0_p0m01	BES1_tnt	0.692052	1.14357
epm_Arth_S0_p0m02	BES1_tnt	0.00812567	2.73264
epm_Arth_S0_p0m03	BES1_tnt	0.0137244	0.244545
epm_Arth_S0_p0m04	BES1_tnt	0.840068	0.821837
epm_Arth_S0_p0m05	BES1_tnt	0.0421864	0.340276
epm_Arth_S0_p0m06	BES1_tnt	0.231034	0.558763
epm_Arth_S0_p0m07	BES1_tnt	1.09226e-09	14.3416
epm_Arth_S0_p0m08	BES1_tnt	2.01836e-05	0
epm_Arth_S0_p0m09	BES1_tnt	0.840068	0.821837
epm_Arth_S0_p0m10	BES1_tnt	0.544481	1.33264
epm_Arth_S0_p0m11	BES1_tnt	0.107468	0.444647
epm_Arth_S0_p0m12	BES1_tnt	0.692052	1.14357
epm_Arth_S0_p0m13	BES1_tnt	0.00213369	0.156411
epm_Arth_S0_p1m00	BES1_tnt	0.840068	0.821837
epm_Arth_S0_p1m01	BES1_tnt	0.00366642	3.15678
epm_Arth_S0_p1m02	BES1_tnt	0.000164625	4.26461
epm_Arth_S0_p1m03	BES1_tnt	0.0671303	2.05739
epm_Arth_S0_p1m05	BES1_tnt	0.544481	1.33264
epm_Arth_S0_p1m08	BES1_tnt	1.27934e-08	10.9709
epm_Arth_S0_p1m09	BES1_tnt	0.0671303	2.05739
epm_Arth_S0_p1m10	BES1_tnt	0.00366642	3.15678
epm_Arth_S0_p1m11	BES1_tnt	0.0421864	0.340276
epm_Arth_S0_p1m12	BES1_tnt	0.231034	0.558763
epm_Arth_S0_p1m13	BES1_tnt	0.840068	0.821837
epm_Arth_S0_p1m14	BES1_tnt	0.231034	0.558763
epm_Arth_S0_p0m01	BZR_tnt	0.00149878	0.287676
epm_Arth_S0_p0m04	BZR_tnt	0.00038312	0.24917
epm_Arth_S0_p0m05	BZR_tnt	1.68006e-05	0.187044
epm_Arth_S0_p0m06	BZR_tnt	5.78923e-10	0.0854785
epm_Arth_S0_p0m08	BZR_tnt	3.09832e-12	0.0579423
epm_Arth_S0_p0m10	BZR_tnt	0.00684346	0.332815
epm_Arth_S0_p0m11	BZR_tnt	4.63849e-11	0.0710034
epm_Arth_S0_p0m12	BZR_tnt	0.00320407	Inf
epm_Arth_S0_p0m13	BZR_tnt	1.69296e-13	0.0460264
epm_Arth_S0_p1m05	BZR_tnt	0.054632	0.450839
epm_Arth_S0_p1m09	BZR_tnt	0.339958	2.12882
epm_Arth_S0_p1m11	BZR_tnt	0.00038312	0.24917
epm_Arth_S0_p1m12	BZR_tnt	0.339958	2.12882
epm_Arth_S0_p1m13	BZR_tnt	0.0974288	3.33239
epm_Arth_S0_p1m14	BZR_tnt	0.339958	2.12882
epm_Arth_S0_p0m00	C2C2YABBY_tnt	0.0889405	2.60812
epm_Arth_S0_p0m01	C2C2YABBY_tnt	1	0.558267
epm_Arth_S0_p0m02	C2C2YABBY_tnt	0.411667	0
epm_Arth_S0_p0m03	C2C2YABBY_tnt	0.411667	0
epm_Arth_S0_p0m04	C2C2YABBY_tnt	0.411667	0
epm_Arth_S0_p0m05	C2C2YABBY_tnt	0.689557	1.17402
epm_Arth_S0_p0m06	C2C2YABBY_tnt	0.411667	0
epm_Arth_S0_p0m07	C2C2YABBY_tnt	0.411667	0
epm_Arth_S0_p0m08	C2C2YABBY_tnt	0.411667	0
epm_Arth_S0_p0m09	C2C2YABBY_tnt	0.411667	0
epm_Arth_S0_p0m10	C2C2YABBY_tnt	0.246585	1.85457
epm_Arth_S0_p0m11	C2C2YABBY_tnt	0.411667	0
epm_Arth_S0_p0m12	C2C2YABBY_tnt	0.411667	0
epm_Arth_S0_p0m13	C2C2YABBY_tnt	0.689557	1.17402
epm_Arth_S0_p1m00	C2C2YABBY_tnt	0.00579059	4.37703
epm_Arth_S0_p1m01	C2C2YABBY_tnt	0.689557	1.17402
epm_Arth_S0_p1m02	C2C2YABBY_tnt	0.246585	1.85457
epm_Arth_S0_p1m03	C2C2YABBY_tnt	7.33246e-25	85.1416
epm_Arth_S0_p1m04	C2C2YABBY_tnt	0.411667	0
epm_Arth_S0_p1m05	C2C2YABBY_tnt	0.411667	0
epm_Arth_S0_p1m06	C2C2YABBY_tnt	0.411667	0
epm_Arth_S0_p1m07	C2C2YABBY_tnt	1	0.558267
epm_Arth_S0_p1m08	C2C2YABBY_tnt	0.246585	1.85457
epm_Arth_S0_p1m09	C2C2YABBY_tnt	0.411667	0
epm_Arth_S0_p1m10	C2C2YABBY_tnt	0.689557	1.17402
epm_Arth_S0_p1m11	C2C2YABBY_tnt	0.00108824	5.4187
epm_Arth_S0_p1m12	C2C2YABBY_tnt	1	0.558267
epm_Arth_S0_p1m13	C2C2YABBY_tnt	0.000170123	6.58405
epm_Arth_S0_p1m14	C2C2YABBY_tnt	0.000170123	6.58405
epm_Arth_S0_p0m01	C3H_tnt	4.41997e-05	0.197512
epm_Arth_S0_p0m02	C3H_tnt	0.000366127	13.1609
epm_Arth_S0_p0m04	C3H_tnt	0.0424776	2.90643
epm_Arth_S0_p0m05	C3H_tnt	0.425224	0.742056
epm_Arth_S0_p0m06	C3H_tnt	0.000780366	0.270198
epm_Arth_S0_p0m07	C3H_tnt	0.543804	1.44592
epm_Arth_S0_p0m08	C3H_tnt	0.232257	0.640128
epm_Arth_S0_p0m09	C3H_tnt	1	1.01505
epm_Arth_S0_p0m10	C3H_tnt	0.000780366	0.270198
epm_Arth_S0_p0m11	C3H_tnt	0.00360579	6.3232
epm_Arth_S0_p0m12	C3H_tnt	0.425224	0.742056
epm_Arth_S0_p0m13	C3H_tnt	0.154315	0.554155
epm_Arth_S0_p1m01	C3H_tnt	2.09556e-05	Inf
epm_Arth_S0_p1m02	C3H_tnt	0.232257	0.640128
epm_Arth_S0_p1m03	C3H_tnt	0.000366127	13.1609
epm_Arth_S0_p1m05	C3H_tnt	5.15504e-06	0.166607
epm_Arth_S0_p1m09	C3H_tnt	0.00773482	0.361852
epm_Arth_S0_p1m10	C3H_tnt	0.839838	1.20332
epm_Arth_S0_p1m13	C3H_tnt	0.0660992	0.48063
epm_Arth_S0_p1m14	C3H_tnt	0.839838	1.20332
epm_Arth_S0_p0m00	CAMTA_tnt	0.631038	0
epm_Arth_S0_p0m01	CAMTA_tnt	0.631038	0
epm_Arth_S0_p0m02	CAMTA_tnt	0.120625	2.7026
epm_Arth_S0_p0m03	CAMTA_tnt	0.120625	2.7026
epm_Arth_S0_p0m04	CAMTA_tnt	0.631038	0
epm_Arth_S0_p0m05	CAMTA_tnt	0.631038	0
epm_Arth_S0_p0m06	CAMTA_tnt	0.631038	0
epm_Arth_S0_p0m07	CAMTA_tnt	2.83195e-10	20.0917
epm_Arth_S0_p0m08	CAMTA_tnt	0.0309791	3.82338
epm_Arth_S0_p0m09	CAMTA_tnt	0.349722	1.70138
epm_Arth_S0_p0m10	CAMTA_tnt	0.0309791	3.82338
epm_Arth_S0_p0m11	CAMTA_tnt	0.631038	0
epm_Arth_S0_p0m12	CAMTA_tnt	1	0.804702
epm_Arth_S0_p0m13	CAMTA_tnt	0.631038	0
epm_Arth_S0_p1m00	CAMTA_tnt	0.631038	0
epm_Arth_S0_p1m01	CAMTA_tnt	0.349722	1.70138
epm_Arth_S0_p1m02	CAMTA_tnt	1	0.804702
epm_Arth_S0_p1m03	CAMTA_tnt	1	0.804702
epm_Arth_S0_p1m04	CAMTA_tnt	0.349722	1.70138
epm_Arth_S0_p1m05	CAMTA_tnt	0.631038	0
epm_Arth_S0_p1m06	CAMTA_tnt	0.349722	1.70138
epm_Arth_S0_p1m07	CAMTA_tnt	2.83195e-10	20.0917
epm_Arth_S0_p1m08	CAMTA_tnt	1	0.804702
epm_Arth_S0_p1m09	CAMTA_tnt	0.631038	0
epm_Arth_S0_p1m10	CAMTA_tnt	0.349722	1.70138
epm_Arth_S0_p1m11	CAMTA_tnt	0.631038	0
epm_Arth_S0_p1m12	CAMTA_tnt	1	0.804702
epm_Arth_S0_p1m13	CAMTA_tnt	0.631038	0
epm_Arth_S0_p1m14	CAMTA_tnt	1	0.804702
epm_Arth_S0_p0m00	E2FDP_tnt	0.850648	0.871701
epm_Arth_S0_p0m01	E2FDP_tnt	2.88575e-08	0
epm_Arth_S0_p0m03	E2FDP_tnt	0.571834	0.752302
epm_Arth_S0_p0m04	E2FDP_tnt	0.0609617	2.05913
epm_Arth_S0_p0m05	E2FDP_tnt	0.035877	0.386837
epm_Arth_S0_p0m06	E2FDP_tnt	1.09882e-06	0.0426124
epm_Arth_S0_p0m08	E2FDP_tnt	0.18523	0.550513
epm_Arth_S0_p0m09	E2FDP_tnt	4.73476e-11	Inf
epm_Arth_S0_p0m10	E2FDP_tnt	0.0126613	2.81394
epm_Arth_S0_p0m11	E2FDP_tnt	1	1.0065
epm_Arth_S0_p0m12	E2FDP_tnt	0.571834	0.752302
epm_Arth_S0_p0m13	E2FDP_tnt	0.0081086	0.316173
epm_Arth_S0_p1m01	E2FDP_tnt	3.24116e-05	6.15405
epm_Arth_S0_p1m02	E2FDP_tnt	1.8359e-09	36.3744
epm_Arth_S0_p1m03	E2FDP_tnt	0.000948685	4.00477
epm_Arth_S0_p1m05	E2FDP_tnt	0.000509589	0.192706
epm_Arth_S0_p1m08	E2FDP_tnt	3.24116e-05	6.15405
epm_Arth_S0_p1m09	E2FDP_tnt	1.09882e-06	0.0426124
epm_Arth_S0_p1m10	E2FDP_tnt	0.0609617	2.05913
epm_Arth_S0_p1m11	E2FDP_tnt	0.262697	1.53902
epm_Arth_S0_p1m12	E2FDP_tnt	0.13469	1.77704
epm_Arth_S0_p1m13	E2FDP_tnt	0.035877	0.386837
epm_Arth_S0_p1m14	E2FDP_tnt	0.13469	1.77704
epm_Arth_S0_p0m00	EIL_tnt	1	0
epm_Arth_S0_p0m01	EIL_tnt	1	0
epm_Arth_S0_p0m02	EIL_tnt	1	0
epm_Arth_S0_p0m03	EIL_tnt	1	0
epm_Arth_S0_p0m04	EIL_tnt	1	0
epm_Arth_S0_p0m05	EIL_tnt	1	0
epm_Arth_S0_p0m06	EIL_tnt	1	0
epm_Arth_S0_p0m07	EIL_tnt	1	0
epm_Arth_S0_p0m08	EIL_tnt	1	0
epm_Arth_S0_p0m09	EIL_tnt	1	0
epm_Arth_S0_p0m10	EIL_tnt	1	0
epm_Arth_S0_p0m11	EIL_tnt	1	0
epm_Arth_S0_p0m12	EIL_tnt	1	0
epm_Arth_S0_p0m13	EIL_tnt	1	0
epm_Arth_S0_p1m00	EIL_tnt	1	0
epm_Arth_S0_p1m01	EIL_tnt	1	0
epm_Arth_S0_p1m02	EIL_tnt	1	0
epm_Arth_S0_p1m03	EIL_tnt	1	0
epm_Arth_S0_p1m04	EIL_tnt	1	0
epm_Arth_S0_p1m05	EIL_tnt	1	0
epm_Arth_S0_p1m06	EIL_tnt	1	0
epm_Arth_S0_p1m07	EIL_tnt	1	0
epm_Arth_S0_p1m08	EIL_tnt	1	0
epm_Arth_S0_p1m09	EIL_tnt	1	0
epm_Arth_S0_p1m10	EIL_tnt	1	0
epm_Arth_S0_p1m11	EIL_tnt	1	0
epm_Arth_S0_p1m12	EIL_tnt	1	0
epm_Arth_S0_p1m13	EIL_tnt	1	0
epm_Arth_S0_p1m14	EIL_tnt	1	0
epm_Arth_S0_p0m00	FAR1_tnt	0.00928101	0
epm_Arth_S0_p0m01	FAR1_tnt	0.00928101	0
epm_Arth_S0_p0m02	FAR1_tnt	0.000808785	3.89671
epm_Arth_S0_p0m03	FAR1_tnt	0.205528	1.70532
epm_Arth_S0_p0m04	FAR1_tnt	0.0710426	0.184898
epm_Arth_S0_p0m05	FAR1_tnt	0.299689	0.385686
epm_Arth_S0_p0m06	FAR1_tnt	0.00928101	0
epm_Arth_S0_p0m07	FAR1_tnt	3.93068e-17	37.3474
epm_Arth_S0_p0m08	FAR1_tnt	1	0.84272
epm_Arth_S0_p0m09	FAR1_tnt	0.606767	0.604243
epm_Arth_S0_p0m10	FAR1_tnt	0.444076	1.39002
epm_Arth_S0_p0m11	FAR1_tnt	0.0710426	0.184898
epm_Arth_S0_p0m12	FAR1_tnt	1	0.84272
epm_Arth_S0_p0m13	FAR1_tnt	0.0710426	0.184898
epm_Arth_S0_p1m00	FAR1_tnt	0.0710426	0.184898
epm_Arth_S0_p1m01	FAR1_tnt	3.66615e-05	5.21448
epm_Arth_S0_p1m02	FAR1_tnt	0.205528	1.70532
epm_Arth_S0_p1m03	FAR1_tnt	6.37234e-06	6.02212
epm_Arth_S0_p1m04	FAR1_tnt	1.1832e-15	28.5107
epm_Arth_S0_p1m05	FAR1_tnt	0.00928101	0
epm_Arth_S0_p1m06	FAR1_tnt	9.02409e-12	15.3052
epm_Arth_S0_p1m07	FAR1_tnt	2.83316e-14	22.619
epm_Arth_S0_p1m08	FAR1_tnt	6.37234e-06	6.02212
epm_Arth_S0_p1m09	FAR1_tnt	0.00928101	0
epm_Arth_S0_p1m10	FAR1_tnt	1	0.84272
epm_Arth_S0_p1m11	FAR1_tnt	0.0710426	0.184898
epm_Arth_S0_p1m12	FAR1_tnt	0.299689	0.385686
epm_Arth_S0_p1m13	FAR1_tnt	0.00928101	0
epm_Arth_S0_p1m14	FAR1_tnt	0.0165282	2.87107
epm_Arth_S0_p0m00	GeBP_tnt	1	0.986999
epm_Arth_S0_p0m01	GeBP_tnt	0.664595	1.18674
epm_Arth_S0_p0m02	GeBP_tnt	0.122117	1.92804
epm_Arth_S0_p0m03	GeBP_tnt	0.664595	1.18674
epm_Arth_S0_p0m04	GeBP_tnt	0.827198	0.805837
epm_Arth_S0_p0m05	GeBP_tnt	0.271932	0.490104
epm_Arth_S0_p0m06	GeBP_tnt	0.081985	0.351969
epm_Arth_S0_p0m07	GeBP_tnt	0.271932	0.490104
epm_Arth_S0_p0m08	GeBP_tnt	0.386422	1.4077
epm_Arth_S0_p0m09	GeBP_tnt	0.271932	0.490104
epm_Arth_S0_p0m10	GeBP_tnt	1	0.986999
epm_Arth_S0_p0m11	GeBP_tnt	0.386422	1.4077
epm_Arth_S0_p0m12	GeBP_tnt	0.195217	1.65341
epm_Arth_S0_p0m13	GeBP_tnt	0.271932	0.490104
epm_Arth_S0_p1m00	GeBP_tnt	7.06454e-05	4.5856
epm_Arth_S0_p1m01	GeBP_tnt	0.664595	1.18674
epm_Arth_S0_p1m02	GeBP_tnt	0.045965	2.23641
epm_Arth_S0_p1m03	GeBP_tnt	3.61474e-07	7.286
epm_Arth_S0_p1m04	GeBP_tnt	0.00146156	3.43814
epm_Arth_S0_p1m05	GeBP_tnt	0.122117	1.92804
epm_Arth_S0_p1m06	GeBP_tnt	3.30694e-11	16.0129
epm_Arth_S0_p1m07	GeBP_tnt	0.045965	2.23641
epm_Arth_S0_p1m08	GeBP_tnt	3.61474e-07	7.286
epm_Arth_S0_p1m09	GeBP_tnt	0.000582807	0
epm_Arth_S0_p1m10	GeBP_tnt	7.06454e-05	4.5856
epm_Arth_S0_p1m11	GeBP_tnt	7.06454e-05	4.5856
epm_Arth_S0_p1m12	GeBP_tnt	0.0147528	2.58515
epm_Arth_S0_p1m13	GeBP_tnt	2.42669e-06	6.2027
epm_Arth_S0_p1m14	GeBP_tnt	0.045965	2.23641
epm_Arth_S0_p0m00	GRF_tnt	1	0
epm_Arth_S0_p0m01	GRF_tnt	1	0
epm_Arth_S0_p0m02	GRF_tnt	1	0
epm_Arth_S0_p0m03	GRF_tnt	1	0
epm_Arth_S0_p0m04	GRF_tnt	1	0
epm_Arth_S0_p0m05	GRF_tnt	1	0
epm_Arth_S0_p0m06	GRF_tnt	1	0
epm_Arth_S0_p0m07	GRF_tnt	1	0
epm_Arth_S0_p0m08	GRF_tnt	1	0
epm_Arth_S0_p0m09	GRF_tnt	1	0
epm_Arth_S0_p0m10	GRF_tnt	1	0
epm_Arth_S0_p0m11	GRF_tnt	1	0
epm_Arth_S0_p0m12	GRF_tnt	1	0
epm_Arth_S0_p0m13	GRF_tnt	1	0
epm_Arth_S0_p1m00	GRF_tnt	1	0
epm_Arth_S0_p1m01	GRF_tnt	1	0
epm_Arth_S0_p1m02	GRF_tnt	1	0
epm_Arth_S0_p1m03	GRF_tnt	1	0
epm_Arth_S0_p1m04	GRF_tnt	1	0
epm_Arth_S0_p1m05	GRF_tnt	1	0
epm_Arth_S0_p1m06	GRF_tnt	1	0
epm_Arth_S0_p1m07	GRF_tnt	1	0
epm_Arth_S0_p1m08	GRF_tnt	1	0
epm_Arth_S0_p1m09	GRF_tnt	1	0
epm_Arth_S0_p1m10	GRF_tnt	1	0
epm_Arth_S0_p1m11	GRF_tnt	1	0
epm_Arth_S0_p1m12	GRF_tnt	1	0
epm_Arth_S0_p1m13	GRF_tnt	1	0
epm_Arth_S0_p1m14	GRF_tnt	1	0
epm_Arth_S0_p0m00	MADS_tnt	1	0
epm_Arth_S0_p0m01	MADS_tnt	1	0
epm_Arth_S0_p0m02	MADS_tnt	1	0
epm_Arth_S0_p0m03	MADS_tnt	1	0
epm_Arth_S0_p0m04	MADS_tnt	1	0
epm_Arth_S0_p0m05	MADS_tnt	1	0
epm_Arth_S0_p0m06	MADS_tnt	1	0
epm_Arth_S0_p0m07	MADS_tnt	1	0
epm_Arth_S0_p0m08	MADS_tnt	1	0
epm_Arth_S0_p0m09	MADS_tnt	1	0
epm_Arth_S0_p0m10	MADS_tnt	1	0
epm_Arth_S0_p0m11	MADS_tnt	1	0
epm_Arth_S0_p0m12	MADS_tnt	1	0
epm_Arth_S0_p0m13	MADS_tnt	1	0
epm_Arth_S0_p1m00	MADS_tnt	1	0
epm_Arth_S0_p1m01	MADS_tnt	1	0
epm_Arth_S0_p1m02	MADS_tnt	1	0
epm_Arth_S0_p1m03	MADS_tnt	1	0
epm_Arth_S0_p1m04	MADS_tnt	1	0
epm_Arth_S0_p1m05	MADS_tnt	1	0
epm_Arth_S0_p1m06	MADS_tnt	1	0
epm_Arth_S0_p1m07	MADS_tnt	1	0
epm_Arth_S0_p1m08	MADS_tnt	1	0
epm_Arth_S0_p1m09	MADS_tnt	1	0
epm_Arth_S0_p1m10	MADS_tnt	1	0
epm_Arth_S0_p1m11	MADS_tnt	1	0
epm_Arth_S0_p1m12	MADS_tnt	1	0
epm_Arth_S0_p1m13	MADS_tnt	1	0
epm_Arth_S0_p1m14	MADS_tnt	1	0
epm_Arth_S0_p0m01	Orphan_tnt	1	0.970616
epm_Arth_S0_p0m02	Orphan_tnt	4.14504e-08	0.0755675
epm_Arth_S0_p0m03	Orphan_tnt	0.849655	1.12479
epm_Arth_S0_p0m04	Orphan_tnt	6.91521e-05	9.55151
epm_Arth_S0_p0m05	Orphan_tnt	0.0213855	0.410702
epm_Arth_S0_p0m06	Orphan_tnt	0.446406	0.729404
epm_Arth_S0_p0m07	Orphan_tnt	2.55602e-05	0.172517
epm_Arth_S0_p0m08	Orphan_tnt	0.000796652	0.253561
epm_Arth_S0_p0m10	Orphan_tnt	0.252772	0.633359
epm_Arth_S0_p0m11	Orphan_tnt	1	0.970616
epm_Arth_S0_p0m12	Orphan_tnt	1	0.970616
epm_Arth_S0_p0m13	Orphan_tnt	0.0557031	0.47592
epm_Arth_S0_p1m01	Orphan_tnt	0.0557031	0.47592
epm_Arth_S0_p1m02	Orphan_tnt	2.92778e-09	0.048357
epm_Arth_S0_p1m03	Orphan_tnt	0.569131	1.31016
epm_Arth_S0_p1m04	Orphan_tnt	2.92778e-09	0.048357
epm_Arth_S0_p1m05	Orphan_tnt	1.3283e-10	0.0232276
epm_Arth_S0_p1m06	Orphan_tnt	0.181516	1.82172
epm_Arth_S0_p1m07	Orphan_tnt	0.00333762	4.39321
epm_Arth_S0_p1m08	Orphan_tnt	1	0.970616
epm_Arth_S0_p1m09	Orphan_tnt	0.849655	1.12479
epm_Arth_S0_p1m10	Orphan_tnt	3.5431e-06	0.137304
epm_Arth_S0_p1m13	Orphan_tnt	0.0213855	0.410702
epm_Arth_S0_p1m14	Orphan_tnt	0.252772	0.633359
epm_Arth_S0_p0m00	RAV_tnt	1	0
epm_Arth_S0_p0m01	RAV_tnt	1	0
epm_Arth_S0_p0m02	RAV_tnt	1	0
epm_Arth_S0_p0m03	RAV_tnt	1	0
epm_Arth_S0_p0m04	RAV_tnt	1	0
epm_Arth_S0_p0m05	RAV_tnt	1	0
epm_Arth_S0_p0m06	RAV_tnt	1	0
epm_Arth_S0_p0m07	RAV_tnt	1	0
epm_Arth_S0_p0m08	RAV_tnt	1	0
epm_Arth_S0_p0m09	RAV_tnt	1	0
epm_Arth_S0_p0m10	RAV_tnt	1	0
epm_Arth_S0_p0m11	RAV_tnt	1	0
epm_Arth_S0_p0m12	RAV_tnt	1	0
epm_Arth_S0_p0m13	RAV_tnt	1	0
epm_Arth_S0_p1m00	RAV_tnt	1	0
epm_Arth_S0_p1m01	RAV_tnt	1	0
epm_Arth_S0_p1m02	RAV_tnt	1	0
epm_Arth_S0_p1m03	RAV_tnt	1	0
epm_Arth_S0_p1m04	RAV_tnt	1	0
epm_Arth_S0_p1m05	RAV_tnt	1	0
epm_Arth_S0_p1m06	RAV_tnt	1	0
epm_Arth_S0_p1m07	RAV_tnt	1	0
epm_Arth_S0_p1m08	RAV_tnt	1	0
epm_Arth_S0_p1m09	RAV_tnt	1	0
epm_Arth_S0_p1m10	RAV_tnt	1	0
epm_Arth_S0_p1m11	RAV_tnt	1	0
epm_Arth_S0_p1m12	RAV_tnt	1	0
epm_Arth_S0_p1m13	RAV_tnt	1	0
epm_Arth_S0_p1m14	RAV_tnt	1	0
epm_Arth_S0_p0m00	RWPRK_tnt	1	0
epm_Arth_S0_p0m01	RWPRK_tnt	1	0
epm_Arth_S0_p0m02	RWPRK_tnt	1	0
epm_Arth_S0_p0m03	RWPRK_tnt	1	0
epm_Arth_S0_p0m04	RWPRK_tnt	1	0
epm_Arth_S0_p0m05	RWPRK_tnt	1	0
epm_Arth_S0_p0m06	RWPRK_tnt	1	0
epm_Arth_S0_p0m07	RWPRK_tnt	1	0
epm_Arth_S0_p0m08	RWPRK_tnt	1	0
epm_Arth_S0_p0m09	RWPRK_tnt	1	0
epm_Arth_S0_p0m10	RWPRK_tnt	1	0
epm_Arth_S0_p0m11	RWPRK_tnt	1	0
epm_Arth_S0_p0m12	RWPRK_tnt	1	0
epm_Arth_S0_p0m13	RWPRK_tnt	1	0
epm_Arth_S0_p1m00	RWPRK_tnt	1	0
epm_Arth_S0_p1m01	RWPRK_tnt	1	0
epm_Arth_S0_p1m02	RWPRK_tnt	1	0
epm_Arth_S0_p1m03	RWPRK_tnt	1	0
epm_Arth_S0_p1m04	RWPRK_tnt	1	0
epm_Arth_S0_p1m05	RWPRK_tnt	1	0
epm_Arth_S0_p1m06	RWPRK_tnt	1	0
epm_Arth_S0_p1m07	RWPRK_tnt	1	0
epm_Arth_S0_p1m08	RWPRK_tnt	1	0
epm_Arth_S0_p1m09	RWPRK_tnt	1	0
epm_Arth_S0_p1m10	RWPRK_tnt	1	0
epm_Arth_S0_p1m11	RWPRK_tnt	1	0
epm_Arth_S0_p1m12	RWPRK_tnt	1	0
epm_Arth_S0_p1m13	RWPRK_tnt	1	0
epm_Arth_S0_p1m14	RWPRK_tnt	1	0
epm_Arth_S0_p0m00	S1Falike_tnt	0.0137681	0.36158
epm_Arth_S0_p0m01	S1Falike_tnt	0.454692	1.38264
epm_Arth_S0_p0m02	S1Falike_tnt	9.20073e-08	28.2751
epm_Arth_S0_p0m03	S1Falike_tnt	0.0230426	2.594
epm_Arth_S0_p0m04	S1Falike_tnt	0.00765431	3.11539
epm_Arth_S0_p0m05	S1Falike_tnt	0.708873	1.19749
epm_Arth_S0_p0m06	S1Falike_tnt	0.00424919	0.301062
epm_Arth_S0_p0m07	S1Falike_tnt	0.708873	1.19749
epm_Arth_S0_p0m08	S1Falike_tnt	0.575677	0.783223
epm_Arth_S0_p0m09	S1Falike_tnt	2.97519e-09	Inf
epm_Arth_S0_p0m10	S1Falike_tnt	0.0380589	0.42844
epm_Arth_S0_p0m11	S1Falike_tnt	1.32365e-05	8.69739
epm_Arth_S0_p0m12	S1Falike_tnt	0.00214391	3.81104
epm_Arth_S0_p0m13	S1Falike_tnt	0.132986	1.86588
epm_Arth_S0_p1m00	S1Falike_tnt	0.0909359	0.50266
epm_Arth_S0_p1m02	S1Falike_tnt	0.35019	0.678345
epm_Arth_S0_p1m03	S1Falike_tnt	0.261163	1.60201
epm_Arth_S0_p1m05	S1Falike_tnt	0.0909359	0.50266
epm_Arth_S0_p1m09	S1Falike_tnt	1	1.03925
epm_Arth_S0_p1m10	S1Falike_tnt	0.0137681	0.36158
epm_Arth_S0_p1m11	S1Falike_tnt	1.37519e-06	13.5941
epm_Arth_S0_p1m12	S1Falike_tnt	1.32365e-05	8.69739
epm_Arth_S0_p1m13	S1Falike_tnt	0.000496095	4.78707
epm_Arth_S0_p1m14	S1Falike_tnt	1	1.03925
epm_Arth_S0_p0m01	SRS_tnt	4.10803e-11	0.0569886
epm_Arth_S0_p0m02	SRS_tnt	0.529329	1.47172
epm_Arth_S0_p0m03	SRS_tnt	0.0965988	0.53138
epm_Arth_S0_p0m05	SRS_tnt	1.82233e-05	0.19205
epm_Arth_S0_p0m06	SRS_tnt	8.55396e-14	0.0261826
epm_Arth_S0_p0m07	SRS_tnt	0.529329	1.47172
epm_Arth_S0_p0m08	SRS_tnt	0.404164	0.71821
epm_Arth_S0_p0m09	SRS_tnt	0.00132187	10.9581
epm_Arth_S0_p1m01	SRS_tnt	0.138624	2.41801
epm_Arth_S0_p1m03	SRS_tnt	0.138624	2.41801
epm_Arth_S0_p1m07	SRS_tnt	0.529329	1.47172
epm_Arth_S0_p1m09	SRS_tnt	0.00235108	0.300035
epm_Arth_S0_p1m14	SRS_tnt	0.0102787	5.26337
epm_Arth_S0_p0m00	TCP_tnt	1	0
epm_Arth_S0_p0m01	TCP_tnt	1	0
epm_Arth_S0_p0m02	TCP_tnt	1	0
epm_Arth_S0_p0m03	TCP_tnt	1	0
epm_Arth_S0_p0m04	TCP_tnt	1	0
epm_Arth_S0_p0m05	TCP_tnt	1	0
epm_Arth_S0_p0m06	TCP_tnt	1	0
epm_Arth_S0_p0m07	TCP_tnt	1	0
epm_Arth_S0_p0m08	TCP_tnt	1	0
epm_Arth_S0_p0m09	TCP_tnt	1	0
epm_Arth_S0_p0m10	TCP_tnt	1	0
epm_Arth_S0_p0m11	TCP_tnt	1	0
epm_Arth_S0_p0m12	TCP_tnt	1	0
epm_Arth_S0_p0m13	TCP_tnt	1	0
epm_Arth_S0_p1m00	TCP_tnt	1	0
epm_Arth_S0_p1m01	TCP_tnt	1	0
epm_Arth_S0_p1m02	TCP_tnt	1	0
epm_Arth_S0_p1m03	TCP_tnt	1	0
epm_Arth_S0_p1m04	TCP_tnt	1	0
epm_Arth_S0_p1m05	TCP_tnt	1	0
epm_Arth_S0_p1m06	TCP_tnt	1	0
epm_Arth_S0_p1m07	TCP_tnt	1	0
epm_Arth_S0_p1m08	TCP_tnt	1	0
epm_Arth_S0_p1m09	TCP_tnt	1	0
epm_Arth_S0_p1m10	TCP_tnt	1	0
epm_Arth_S0_p1m11	TCP_tnt	1	0
epm_Arth_S0_p1m12	TCP_tnt	1	0
epm_Arth_S0_p1m13	TCP_tnt	1	0
epm_Arth_S0_p1m14	TCP_tnt	1	0
epm_Arth_S0_p0m00	zfGRF_tnt	0.352071	0.309707
epm_Arth_S0_p0m01	zfGRF_tnt	0.207973	1.86875
epm_Arth_S0_p0m02	zfGRF_tnt	0.0222931	2.904
epm_Arth_S0_p0m03	zfGRF_tnt	0.00153055	4.18018
epm_Arth_S0_p0m04	zfGRF_tnt	0.109064	2.36033
epm_Arth_S0_p0m05	zfGRF_tnt	0.0650255	0
epm_Arth_S0_p0m06	zfGRF_tnt	0.0650255	0
epm_Arth_S0_p0m07	zfGRF_tnt	0.528225	1.42304
epm_Arth_S0_p0m08	zfGRF_tnt	0.00633008	3.50748
epm_Arth_S0_p0m09	zfGRF_tnt	1	1.01755
epm_Arth_S0_p0m10	zfGRF_tnt	0.109064	2.36033
epm_Arth_S0_p0m11	zfGRF_tnt	0.0222931	2.904
epm_Arth_S0_p0m12	zfGRF_tnt	0.352071	0.309707
epm_Arth_S0_p0m13	zfGRF_tnt	0.352071	0.309707
epm_Arth_S0_p1m00	zfGRF_tnt	0.76079	0.647757
epm_Arth_S0_p1m01	zfGRF_tnt	0.000317164	4.93234
epm_Arth_S0_p1m02	zfGRF_tnt	0.528225	1.42304
epm_Arth_S0_p1m03	zfGRF_tnt	0.0222931	2.904
epm_Arth_S0_p1m04	zfGRF_tnt	5.66155e-05	5.77836
epm_Arth_S0_p1m05	zfGRF_tnt	0.0650255	0
epm_Arth_S0_p1m06	zfGRF_tnt	1	1.01755
epm_Arth_S0_p1m07	zfGRF_tnt	1.16959e-06	7.82323
epm_Arth_S0_p1m08	zfGRF_tnt	0.0650255	0
epm_Arth_S0_p1m09	zfGRF_tnt	0.109064	2.36033
epm_Arth_S0_p1m10	zfGRF_tnt	1	1.01755
epm_Arth_S0_p1m11	zfGRF_tnt	0.76079	0.647757
epm_Arth_S0_p1m12	zfGRF_tnt	0.207973	1.86875
epm_Arth_S0_p1m13	zfGRF_tnt	0.0650255	0
epm_Arth_S0_p1m14	zfGRF_tnt	0.109064	2.36033
