# Supplementary material for: Modelling genetic variation effects in plant gene regulatory networks using transfer learning on genomic and transcription factor binding data
Source: Research Square preprint supplement (doi:10.21203/rs.3.rs-6247751/v1), 2025-04-10
Supplement: Supplementary file 8 [file d4d627c4451417510ae9a3d8.xlsx]

## Sheet: Tabellenblatt1
Supplementary table 7 - TF family binding clusters GO enrichments
NAME	cluster	Count	p.value	adj.p.value	FDR(-log10)	FDR	Count(log2)
Carbohydrate metabolism	c1-bHLH-bZIP-BZR-ZFHD	23	0.000382311	0.0105554	1.97653	Sig.	4.52356
Cell division	c4-E2FDP-bZIP-ZFHD-WRKY	57	6.30642e-07	1.95499e-05	4.70886	Sig.	5.83289
Chromatin organisation	c4-E2FDP-bZIP-ZFHD-WRKY	46	5.78052e-05	0.000895981	3.0477	Sig.	5.52356
Chromatin organisation.chromatin structure	c4-E2FDP-bZIP-ZFHD-WRKY	16	1.26244e-07	2.94148e-05	4.53143	Sig.	4
Chromatin organisation.chromatin structure.DNA wrapping	c4-E2FDP-bZIP-ZFHD-WRKY	10	2.66551e-05	0.0287875	1.5408	Sig.	3.32193
DNA damage response	c7-ZFHD-BBRBPC-ND-bZIP	1	0.00336476	0.0173846	1.75984	Sig.	0
Enzyme classification.EC_2 transferases.EC_2-7 transferase transferring phosphorus-containing group	c2-WRKY-bZIP-ZFHD-zfGRF	61	2.53346e-05	0.0273614	1.56286	Sig.	5.93074
Photosynthesis	c6-GeBP-ZFHD-WRKY-bZIP	30	0.000559282	0.0173377	1.76101	Sig.	4.90689
Phytohormone action	c1-bHLH-bZIP-BZR-ZFHD	48	0.000680991	0.0105554	1.97653	Sig.	5.58496
Plant organogenesis	c7-ZFHD-BBRBPC-ND-bZIP	28	0.00220728	0.0136851	1.86375	Sig.	4.80735
Plant organogenesis.leaf formation	c7-ZFHD-BBRBPC-ND-bZIP	11	0.00012265	0.00947139	2.02359	Sig.	3.45943
Protein biosynthesis	c2-WRKY-bZIP-ZFHD-zfGRF	6	0.000313304	0.00971242	2.01267	Sig.	2.58496
Protein biosynthesis	c12-SRS-WRKY-bZIP-ZFHD	53	0.000434706	0.0134759	1.87044	Sig.	5.72792
Protein biosynthesis	c11-REM-ZFHD-ABI3VP1-WRKY	25	0.000469097	0.014542	1.83738	Sig.	4.64386
Protein biosynthesis	c7-ZFHD-BBRBPC-ND-bZIP	27	0.000240707	0.00248731	2.60427	Sig.	4.75489
Protein biosynthesis.ribosome biogenesis	c7-ZFHD-BBRBPC-ND-bZIP	8	0.000162599	0.00947139	2.02359	Sig.	3
Protein homeostasis.protein quality control	c9-HSF-S1Falike-WRKY-bZIP	32	2.76956e-12	6.45307e-10	9.19023	Sig.	5
Protein homeostasis.protein quality control.smallHsp holdase chaperone activities	c9-HSF-S1Falike-WRKY-bZIP	8	7.83289e-06	0.00845952	2.07265	Sig.	3
Protein modification	c7-ZFHD-BBRBPC-ND-bZIP	121	0.00135669	0.0105143	1.97822	Sig.	6.91886
Protein modification	c1-bHLH-bZIP-BZR-ZFHD	30	0.00170811	0.0132378	1.87818	Sig.	4.90689
Protein modification.phosphorylation	c7-ZFHD-BBRBPC-ND-bZIP	79	0.00097141	0.0452677	1.34421	Sig.	6.30378
RNA biosynthesis	c7-ZFHD-BBRBPC-ND-bZIP	216	4.6715e-08	1.44817e-06	5.83918	Sig.	7.75489
RNA biosynthesis	c1-bHLH-bZIP-BZR-ZFHD	112	0.00109152	0.011279	1.94773	Sig.	6.80735
RNA biosynthesis.DNA-binding transcriptional regulation	c1-bHLH-bZIP-BZR-ZFHD	103	2.48303e-05	0.00578547	2.23766	Sig.	6.6865
RNA biosynthesis.DNA-binding transcriptional regulation	c7-ZFHD-BBRBPC-ND-bZIP	194	1.68807e-10	3.93321e-08	7.40525	Sig.	7.59991
RNA biosynthesis.DNA-binding transcriptional regulation.beta-barrel DNA-binding domain	c7-ZFHD-BBRBPC-ND-bZIP	21	7.84947e-05	0.0423871	1.37277	Sig.	4.39232
RNA biosynthesis.DNA-binding transcriptional regulation.helix-turn-helix DNA-binding domain	c7-ZFHD-BBRBPC-ND-bZIP	54	9.09642e-06	0.00982413	2.00771	Sig.	5.75489
RNA processing	c11-REM-ZFHD-ABI3VP1-WRKY	39	0.00261376	0.0405132	1.3924	Sig.	5.2854
RNA processing.RNA homeostasis.secretory ribonuclease activities	c6-GeBP-ZFHD-WRKY-bZIP	5	5.6197e-07	0.000606927	3.21686	Sig.	2.32193
RNA processing.mRNA silencing	c7-ZFHD-BBRBPC-ND-bZIP	13	8.37558e-05	0.00947139	2.02359	Sig.	3.70044
RNA processing.mRNA silencing.miRNA pathway	c7-ZFHD-BBRBPC-ND-bZIP	11	0.000121816	0.0438538	1.35799	Sig.	3.45943
Solute transport	c7-ZFHD-BBRBPC-ND-bZIP	54	0.000104894	0.00162586	2.78892	Sig.	5.75489
