# Supplementary material for: Modelling genetic variation effects in plant gene regulatory networks using transfer learning on genomic and transcription factor binding data
Source: Research Square preprint supplement (doi:10.21203/rs.3.rs-6247751/v1), 2025-04-10
Supplement: Supplementary file 9 [file e34189486e890323ec1f15fb.xlsx]

## Sheet: SNP effect on model predictions
Supplementary table 8 - Variant effect analysis of SNPs from GWAS studies in Arabidopsis thaliana
snp_ID	Chrom	Pos	snp.ref	snp.alt	maf	snp.annotations.0.effect	study.phenotype.name	gene_id	cis_region	start	end	ABI3VP1_tnt	AP2EREBP_tnt	ARF_ecoli	ARF_tnt	ARID_tnt	BBRBPC_tnt	BES1_tnt	BZR_tnt	C2C2YABBY_tnt	C2C2dof_tnt	C2C2gata_tnt	C2H2_tnt	C3H_tnt	CAMTA_tnt	CPP_tnt	E2FDP_tnt	EIL_tnt	FAR1_tnt	G2like_tnt	GRF_tnt	GeBP_tnt	HB_tnt	HSF_tnt	Homeobox_ecoli	Homeobox_tnt	LOBAS2_tnt	MADS_tnt	MYB_tnt	MYBrelated_tnt	NAC_tnt	ND_tnt	Orphan_tnt	RAV_tnt	REM_tnt	RWPRK_tnt	S1Falike_tnt	SBP_tnt	SRS_tnt
1.16653911.A_C.clim-gs10	1	16653911	A	C	0.0518962	INTERGENIC	clim-gs10	AT1G43900	promoter	16653029	16654529	0	0	0	0	0	0	0	0	0	0	0	0	0	0	0	0	0	0	0	0	0	0	0	-1	0	0	0	0	0	0	0	0	0	0	0	0	0	0
1.16645042.C_A.clim-gs10	1	16645042	C	A	0.0538922	.	clim-gs10	AT1G07233	promoter	16644543	16646043	0	0	0	0	0	0	0	0	0	0	0	0	0	0	0	0	0	0	0	0	0	0	0	0	0	0	0	0	0	0	0	0	0	0	0	0	0	0
1.16645559.T_C.clim-gs10	1	16645559	T	C	0.0538922	INTERGENIC	clim-gs10	AT1G07233	promoter	16644543	16646043	0	0	0	0	0	0	0	0	0	-1	0	0	0	0	0	0	0	0	0	0	0	0	0	0	0	0	0	0	0	0	0	0	0	0	0	0	0	0
1.20218672.C_A.YEL	1	20218672	C	A	0.0736842	NON_SYNONYMOUS_CODING	YEL	AT1G07943	terminator	20217721	20219221	0	0	0	0	0	0	0	0	0	0	0	0	0	0	0	0	0	0	0	0	0	0	0	0	0	0	0	0	0	0	0	0	0	0	0	0	0	0
1.20229792.A_C.YEL	1	20229792	A	C	0.0736842	UTR_3_PRIME	YEL	AT1G54180	terminator	20229737	20231237	0	0	0	0	0	0	0	0	0	0	0	0	0	0	0	0	0	0	0	0	0	0	0	0	0	0	0	0	0	0	0	0	0	0	0	0	0	0
1.20220576.T_A.YEL	1	20220576	T	A	0.0736842	INTERGENIC	YEL	AT1G54170	terminator	20220028	20221528	0	0	0	0	0	0	0	0	0	0	0	0	0	0	0	0	0	0	0	0	0	0	0	0	0	0	0	0	0	0	0	0	0	0	0	-1	0	0
1.20226039.A_T.YEL	1	20226039	A	T	0.0736842	INTERGENIC	YEL	AT1G54170	promoter	20225555	20227055	0	0	0	0	0	0	0	0	0	0	0	0	0	0	0	0	0	0	0	0	0	0	0	0	0	0	0	0	0	0	0	0	0	0	0	0	0	0
1.20229750.G_A.YEL	1	20229750	G	A	0.0736842	UTR_3_PRIME	YEL	AT1G54180	terminator	20229737	20231237	0	0	0	0	0	0	0	0	0	0	0	0	0	0	0	0	0	0	0	0	0	0	0	0	0	0	0	0	0	0	0	0	0	0	0	0	0	0
1.20220577.A_T.YEL	1	20220577	A	T	0.0736842	INTERGENIC	YEL	AT1G54170	terminator	20220028	20221528	0	0	0	0	0	0	0	0	0	0	0	0	0	0	0	0	0	0	0	0	0	0	0	0	0	0	0	0	0	0	0	0	0	0	0	0	0	0
1.4140192.G_T.avrPphB	1	4140192	G	T	0.477778	INTERGENIC	avrPphB	AT1G12200	terminator	4139658	4141158	0	0	0	0	0	0	0	0	0	0	0	0	0	0	0	0	0	0	0	0	0	0	0	0	0	0	0	0	0	0	0	0	0	0	0	0	0	0
1.4140389.G_C.avrPphB	1	4140389	G	C	0.477778	INTERGENIC	avrPphB	AT1G12200	terminator	4139658	4141158	0	0	0	0	0	0	0	0	0	0	0	0	0	0	0	0	0	0	0	0	0	0	0	0	0	0	0	0	0	0	0	0	0	0	0	0	0	0
1.4140425.G_A.avrPphB	1	4140425	G	A	0.477778	INTERGENIC	avrPphB	AT1G12200	terminator	4139658	4141158	0	0	0	0	0	0	0	0	0	0	0	0	0	0	0	0	0	0	0	0	0	0	0	0	0	0	0	0	0	0	0	0	0	0	0	0	0	0
1.4140565.T_C.avrPphB	1	4140565	T	C	0.477778	INTERGENIC	avrPphB	AT1G12200	terminator	4139658	4141158	0	0	0	0	0	0	0	0	0	0	0	0	0	0	0	0	0	0	0	0	0	0	0	0	0	0	0	0	0	0	0	0	0	0	0	0	0	0
1.4140773.A_G.avrPphB	1	4140773	A	G	0.477778	INTERGENIC	avrPphB	AT1G12200	terminator	4139658	4141158	0	0	0	0	0	0	0	0	0	0	0	0	0	0	0	0	0	0	0	0	0	0	0	0	0	0	0	0	0	0	0	0	0	0	0	0	0	0
1.4140265.T_C.avrPphB	1	4140265	T	C	0.477778	INTERGENIC	avrPphB	AT1G12200	terminator	4139658	4141158	0	0	0	0	0	0	0	0	0	0	0	0	0	0	0	0	0	0	0	0	0	0	0	0	0	0	0	0	0	0	0	0	0	0	0	0	0	0
1.4140372.T_G.avrPphB	1	4140372	T	G	0.477778	INTERGENIC	avrPphB	AT1G12200	terminator	4139658	4141158	0	0	0	0	0	0	0	0	0	0	0	0	0	0	0	0	0	0	0	0	0	0	0	0	0	0	0	0	0	0	0	0	0	0	0	0	0	0
1.4140614.T_A.avrPphB	1	4140614	T	A	0.477778	INTERGENIC	avrPphB	AT1G12200	terminator	4139658	4141158	0	0	0	0	0	0	0	0	0	0	0	0	0	0	0	0	0	0	0	0	0	0	0	0	0	0	0	0	0	0	0	0	0	0	0	0	0	0
1.4140677.G_A.avrPphB	1	4140677	G	A	0.477778	INTERGENIC	avrPphB	AT1G12200	terminator	4139658	4141158	0	0	0	0	0	0	0	0	0	0	0	0	0	0	0	0	0	0	0	0	0	0	0	0	0	0	0	0	0	0	0	0	0	0	0	0	0	0
1.4140516.G_A.avrPphB	1	4140516	G	A	0.477778	INTERGENIC	avrPphB	AT1G12200	terminator	4139658	4141158	0	0	0	0	0	0	0	0	0	0	0	0	0	0	0	0	0	0	0	0	0	0	0	0	0	0	0	1	0	0	0	0	0	0	0	0	0	0
1.4140761.T_A.avrPphB	1	4140761	T	A	0.477778	INTERGENIC	avrPphB	AT1G12200	terminator	4139658	4141158	0	0	0	0	0	0	0	0	0	0	0	0	0	0	0	0	0	0	0	0	0	0	0	0	0	0	0	0	0	0	0	0	0	0	0	0	0	0
1.4140953.C_A.avrPphB	1	4140953	C	A	0.477778	SYNONYMOUS_CODING	avrPphB	AT1G12200	terminator	4139658	4141158	0	0	0	0	0	0	0	0	0	0	0	0	0	0	0	0	0	0	0	0	0	0	0	0	0	0	0	0	0	0	0	0	0	0	0	0	0	0
1.4140428.T_G.avrPphB	1	4140428	T	G	0.477778	INTERGENIC	avrPphB	AT1G12200	terminator	4139658	4141158	0	0	0	0	0	0	0	0	0	0	0	0	0	0	0	0	0	0	0	0	0	0	0	0	0	0	0	0	0	0	0	0	0	0	0	0	0	0
1.4140523.G_T.avrPphB	1	4140523	G	T	0.477778	INTERGENIC	avrPphB	AT1G12200	terminator	4139658	4141158	0	0	0	0	0	0	0	0	0	0	0	0	0	0	0	0	0	0	0	0	0	0	0	0	0	0	0	0	0	0	0	0	0	0	0	0	0	0
1.4140629.T_C.avrPphB	1	4140629	T	C	0.477778	INTERGENIC	avrPphB	AT1G12200	terminator	4139658	4141158	0	0	0	0	0	0	0	0	0	0	0	0	0	0	0	0	0	0	0	0	0	0	0	0	0	0	0	0	0	0	0	0	0	0	0	0	0	0
1.4140752.A_G.avrPphB	1	4140752	A	G	0.477778	INTERGENIC	avrPphB	AT1G12200	terminator	4139658	4141158	0	0	0	0	0	0	0	0	0	0	0	0	0	0	0	0	0	0	0	0	0	0	0	0	0	0	0	0	0	0	0	0	0	0	0	0	0	0
1.4140885.A_C.avrPphB	1	4140885	A	C	0.477778	INTERGENIC	avrPphB	AT1G12200	terminator	4139658	4141158	0	0	0	0	0	0	0	0	0	0	0	0	0	0	0	0	0	0	0	0	0	0	0	0	0	0	0	0	0	0	0	0	0	0	0	0	0	0
1.4140402.A_C.avrPphB	1	4140402	A	C	0.477778	INTERGENIC	avrPphB	AT1G12200	terminator	4139658	4141158	0	0	0	0	0	0	0	0	0	0	0	0	0	0	0	0	0	0	0	0	0	0	0	0	0	0	0	0	0	0	0	0	0	0	0	0	0	0
1.4140496.G_T.avrPphB	1	4140496	G	T	0.477778	INTERGENIC	avrPphB	AT1G12200	terminator	4139658	4141158	0	0	0	0	0	0	0	0	0	0	0	0	0	0	0	0	0	0	0	0	0	0	0	0	0	0	0	0	0	0	0	0	0	0	0	0	0	0
1.4140500.T_A.avrPphB	1	4140500	T	A	0.477778	INTERGENIC	avrPphB	AT1G12200	terminator	4139658	4141158	0	0	0	0	0	0	0	0	0	0	0	0	0	0	0	0	0	0	0	0	0	0	0	0	0	0	0	0	0	0	0	0	0	0	0	0	0	0
1.4140569.G_A.avrPphB	1	4140569	G	A	0.477778	INTERGENIC	avrPphB	AT1G12200	terminator	4139658	4141158	0	0	0	0	0	0	0	0	0	0	0	0	0	0	0	0	0	0	0	0	0	0	0	0	0	0	0	0	0	0	0	0	0	0	0	0	0	0
1.4140829.C_T.avrPphB	1	4140829	C	T	0.477778	INTERGENIC	avrPphB	AT1G12200	terminator	4139658	4141158	0	0	0	0	0	0	0	0	0	0	0	0	0	0	0	0	0	0	0	0	0	0	0	0	0	0	0	0	0	0	0	0	0	0	0	0	0	0
1.4140855.G_T.avrPphB	1	4140855	G	T	0.477778	INTERGENIC	avrPphB	AT1G12200	terminator	4139658	4141158	0	0	0	0	0	0	0	0	0	0	0	0	0	0	0	0	0	0	0	0	0	0	0	0	0	0	0	0	0	0	0	0	0	0	0	0	0	0
1.4140858.C_A.avrPphB	1	4140858	C	A	0.477778	INTERGENIC	avrPphB	AT1G12200	terminator	4139658	4141158	0	0	0	0	0	0	0	0	0	0	0	0	0	0	0	0	0	0	0	0	0	0	0	0	0	0	0	0	0	0	0	0	0	0	0	0	0	0
1.4140965.G_T.avrPphB	1	4140965	G	T	0.477778	SYNONYMOUS_CODING	avrPphB	AT1G12200	terminator	4139658	4141158	0	-1	0	0	0	0	0	0	0	0	0	0	0	0	0	0	0	0	0	0	0	0	0	0	0	0	0	0	0	0	0	0	0	0	0	0	0	0
1.4140971.G_T.avrPphB	1	4140971	G	T	0.477778	SYNONYMOUS_CODING	avrPphB	AT1G12200	terminator	4139658	4141158	0	0	0	0	0	0	0	0	0	0	0	0	0	0	0	0	0	0	0	0	0	0	0	0	0	0	0	0	0	0	0	0	0	0	0	0	0	0
1.5313894.C_T.clim-bio4	1	5313894	C	T	0.0538922	INTRON	clim-bio4	AT1G15460	promoter	5313628	5315128	0	0	0	0	0	0	0	0	0	0	0	0	0	0	0	0	0	0	0	0	0	0	0	0	0	0	0	0	0	0	0	0	0	0	0	0	0	0
1.27647184.T_G.clim-tmin2	1	27647184	T	G	0.0623742	INTERGENIC	clim-tmin2	AT1G73550	terminator	27646755	27648255	0	0	0	0	0	0	0	0	0	0	0	0	0	0	0	0	0	0	0	0	0	0	0	0	0	-1	0	0	0	0	0	0	0	0	0	0	0	0
1.16477895.C_T.clim-gs10	1	16477895	C	T	0.0518962	INTERGENIC	clim-gs10	AT1G43690	promoter	16477158	16478658	0	0	0	0	0	0	0	0	0	0	0	0	0	0	0	0	0	0	0	0	0	0	0	0	0	0	0	0	0	0	0	0	0	0	0	0	0	0
1.16478199.T_A.clim-gs10	1	16478199	T	A	0.0518962	INTERGENIC	clim-gs10	AT1G43690	promoter	16477158	16478658	0	0	0	0	0	0	0	0	0	0	0	0	0	0	0	0	0	0	1	0	0	0	0	0	0	0	0	0	0	0	0	0	0	0	0	0	0	0
1.9345595.T_A.clim-gs10	1	9345595	T	A	0.0399202	INTERGENIC	clim-gs10	AT1G26940	terminator	9344823	9346323	0	0	0	0	0	0	0	0	0	0	0	0	0	0	0	0	0	0	0	0	0	0	0	0	0	0	0	0	0	0	0	0	0	0	0	0	0	0
1.17525061.C_T.clim-gs10	1	17525061	C	T	0.0419162	INTERGENIC	clim-gs10	AT1G47655	promoter	17524341	17525841	0	0	0	0	0	0	0	0	0	0	0	0	0	0	0	0	0	0	0	0	0	0	0	0	0	0	0	0	0	0	0	0	0	0	0	0	0	0
1.16608316.C_A.clim-gs10	1	16608316	C	A	0.0558882	INTERGENIC	clim-gs10	AT1G43825	terminator	16607602	16609102	0	0	0	0	0	0	0	0	0	0	0	0	0	0	0	0	0	0	0	0	0	0	0	0	0	0	0	0	0	0	0	0	0	0	0	0	0	0
1.16609336.G_T.clim-gs10	1	16609336	G	T	0.0558882	.	clim-gs10	AT1G43825	promoter	16608318	16609818	0	0	0	0	0	0	0	0	0	0	0	0	0	0	0	0	0	0	0	0	0	0	0	0	0	0	0	0	0	0	0	0	0	0	0	0	0	0
1.5305598.A_T.clim-bio4	1	5305598	A	T	0.0558882	NON_SYNONYMOUS_CODING	clim-bio4	AT1G15440	terminator	5305026	5306526	0	0	0	0	0	0	0	0	0	0	-1	0	0	0	0	0	0	0	0	0	0	0	0	0	0	0	0	0	0	0	0	0	0	0	0	0	0	0
1.26429989.C_A.clim-gs10	1	26429989	C	A	0.0179641	.	clim-gs10	AT1G70190	promoter	26429497	26430997	0	0	0	0	0	0	0	0	0	0	0	0	0	0	0	0	0	0	0	0	0	0	0	0	0	0	0	0	0	0	0	0	0	0	0	0	0	0
1.16586662.A_G.clim-gs10	1	16586662	A	G	0.0518962	.	clim-gs10	AT1G43820	promoter	16585276	16586776	0	0	0	0	0	0	0	0	0	0	0	0	0	0	0	0	0	0	0	0	0	0	0	0	0	0	0	0	0	0	0	0	0	0	0	0	0	0
1.16624745.A_C.clim-gs10	1	16624745	A	C	0.0518962	INTERGENIC	clim-gs10	AT1G43860	promoter	16624004	16625504	0	0	0	0	0	0	0	0	0	0	0	0	0	0	0	0	0	0	0	0	0	0	0	0	0	0	0	0	0	0	0	0	0	0	0	0	0	0
1.2872948.T_G.clim-gs10	1	2872948	T	G	0.0518962	INTERGENIC	clim-gs10	AT1G08930	promoter	2872299	2873799	0	0	0	0	0	0	0	0	0	0	0	0	0	0	0	0	0	0	0	0	0	0	0	0	0	0	0	0	0	0	0	0	0	0	0	0	0	0
1.5323870.C_T.clim-bio4	1	5323870	C	T	0.0618762	UTR_5_PRIME	clim-bio4	AT1G15490	promoter	5323395	5324895	0	0	0	0	0	0	0	0	0	1	0	0	0	0	0	0	0	0	0	0	0	0	0	0	0	0	0	0	0	0	0	0	0	0	0	0	0	0
1.16494248.T_G.clim-gs10	1	16494248	T	G	0.0518962	INTERGENIC	clim-gs10	AT1G43720	promoter	16494079	16495579	0	0	0	0	0	0	0	0	0	0	0	0	0	0	0	0	0	0	0	0	0	0	0	0	0	0	0	0	0	0	0	0	0	0	0	0	0	0
1.16474061.G_T.clim-gs10	1	16474061	G	T	0.0518962	INTERGENIC	clim-gs10	AT1G43680	terminator	16472843	16474343	0	0	0	0	0	0	0	0	0	0	0	0	0	0	0	0	0	0	0	0	0	0	0	0	0	0	0	0	0	0	0	0	0	0	0	0	0	0
1.16488747.G_A.clim-gs10	1	16488747	G	A	0.0518962	INTERGENIC	clim-gs10	AT1G43710	promoter	16487962	16489462	0	0	0	0	0	0	0	0	0	0	0	0	0	0	0	0	0	0	0	0	0	0	0	0	0	0	0	0	0	0	0	0	0	0	0	0	0	0
1.16494269.A_T.clim-gs10	1	16494269	A	T	0.0518962	INTERGENIC	clim-gs10	AT1G43720	promoter	16494079	16495579	0	0	0	0	0	0	0	0	0	0	0	0	0	0	0	0	0	0	0	0	0	0	0	0	0	0	0	0	0	0	0	0	0	0	0	0	0	0
1.16495978.C_G.clim-gs10	1	16495978	C	G	0.0518962	NON_SYNONYMOUS_CODING	clim-gs10	AT1G43722	promoter	16495402	16496902	0	1	0	0	0	0	0	0	0	0	0	0	0	0	0	0	0	0	0	0	0	0	0	0	0	0	0	0	0	0	0	0	0	0	0	0	0	0
1.16497885.T_A.clim-gs10	1	16497885	T	A	0.0518962	INTERGENIC	clim-gs10	AT1G43722	terminator	16496877	16498377	0	0	0	0	0	0	0	0	0	0	0	0	0	0	0	0	0	0	0	0	0	0	0	0	0	0	0	0	0	0	0	0	0	0	0	0	0	0
1.16531636.G_C.clim-gs10	1	16531636	G	C	0.0518962	.	clim-gs10	AT1G43760	promoter	16530565	16532065	0	0	0	0	0	0	0	0	0	0	0	0	0	0	0	0	0	0	0	0	0	0	0	0	0	0	0	0	0	0	0	0	0	0	0	0	0	0
1.16548342.A_T.clim-gs10	1	16548342	A	T	0.0518962	INTERGENIC	clim-gs10	AT1G43770	promoter	16547416	16548916	0	0	0	0	0	0	0	0	0	0	0	0	0	0	0	0	0	0	0	0	0	0	0	0	0	0	0	0	1	0	0	0	0	0	0	0	0	0
1.16472251.G_T.clim-gs10	1	16472251	G	T	0.0518962	NON_SYNONYMOUS_CODING	clim-gs10	AT1G43680	promoter	16471204	16472704	0	0	0	0	0	0	0	0	0	0	0	0	0	0	0	0	0	0	0	0	0	0	0	0	0	0	0	0	0	0	0	0	0	0	0	0	0	0
1.16489019.C_T.clim-gs10	1	16489019	C	T	0.0518962	INTERGENIC	clim-gs10	AT1G43710	promoter	16487962	16489462	0	0	0	0	0	0	0	0	0	0	0	0	0	0	0	0	0	0	0	0	0	0	0	0	0	0	0	0	0	0	0	0	0	0	0	0	0	-1
1.16494123.T_A.clim-gs10	1	16494123	T	A	0.0518962	INTERGENIC	clim-gs10	AT1G43720	promoter	16494079	16495579	0	0	0	0	0	0	0	0	0	0	0	0	0	0	0	0	0	0	0	0	0	0	0	0	-1	0	0	0	0	0	0	0	0	0	0	0	0	0
1.16494917.T_G.clim-gs10	1	16494917	T	G	0.0518962	INTERGENIC	clim-gs10	AT1G43720	promoter	16494079	16495579	0	0	0	0	0	0	0	0	0	0	0	0	0	0	0	0	0	0	0	0	0	0	0	0	0	0	0	0	0	0	0	0	0	0	0	0	0	0
1.16488916.C_T.clim-gs10	1	16488916	C	T	0.0518962	INTERGENIC	clim-gs10	AT1G43710	promoter	16487962	16489462	0	0	0	0	0	0	0	0	0	0	0	0	0	0	-1	0	0	0	0	0	0	0	0	0	0	0	0	0	0	0	0	0	0	0	0	0	0	0
1.16489313.G_A.clim-gs10	1	16489313	G	A	0.0518962	.	clim-gs10	AT1G43710	promoter	16487962	16489462	0	0	0	0	0	0	0	0	0	0	0	0	0	0	0	0	0	0	0	0	0	0	0	0	0	0	0	0	0	0	0	0	0	0	0	0	0	0
1.16495703.T_G.clim-gs10	1	16495703	T	G	0.0518962	SYNONYMOUS_CODING	clim-gs10	AT1G43722	promoter	16495402	16496902	0	0	0	0	0	0	0	0	0	0	0	0	0	0	0	0	0	0	0	0	0	0	0	0	0	0	0	0	0	0	0	0	0	0	0	0	0	0
1.16496892.C_G.clim-gs10	1	16496892	C	G	0.0518962	NON_SYNONYMOUS_CODING	clim-gs10	AT1G43722	promoter	16495402	16496902	0	0	0	0	0	0	0	0	0	0	0	0	0	0	0	0	0	0	0	0	0	0	0	0	0	0	0	0	0	0	0	0	0	0	0	0	0	0
1.24703810.A_T.clim-gs10	1	24703810	A	T	0.0319361	INTERGENIC	clim-gs10	AT1G66270	promoter	24702666	24704166	0	0	0	0	0	0	0	0	0	0	0	0	0	0	0	0	0	0	0	0	0	0	0	0	0	0	0	0	0	0	0	0	0	0	0	0	0	0
1.16477596.G_A.clim-gs10	1	16477596	G	A	0.0538922	INTERGENIC	clim-gs10	AT1G43690	promoter	16477158	16478658	0	0	0	0	0	0	0	0	0	0	0	0	0	0	0	0	0	0	0	0	0	0	0	0	0	0	0	0	0	0	0	0	0	0	0	0	0	0
1.29646075.A_T.clim-gs10	1	29646075	A	T	0.0399202	INTERGENIC	clim-gs10	AT1G78860	terminator	29645002	29646502	0	0	0	0	0	0	0	0	0	0	0	0	0	0	0	0	0	0	0	0	0	0	0	0	0	0	0	0	0	0	0	0	0	0	0	0	0	0
1.24703937.A_T.clim-gs10	1	24703937	A	T	0.0359281	INTERGENIC	clim-gs10	AT1G66270	promoter	24702666	24704166	0	0	0	0	0	0	0	0	0	0	0	0	0	0	0	0	0	0	0	0	0	0	0	0	0	0	0	0	0	0	0	0	0	0	0	0	0	0
1.27655912.A_T.clim-gs10	1	27655912	A	T	0.0558882	INTERGENIC	clim-gs10	AT1G73580	terminator	27655269	27656769	0	0	0	0	0	0	0	0	0	0	0	0	0	0	0	0	0	0	0	0	0	0	0	0	0	0	0	0	0	0	0	0	0	0	0	0	0	0
1.27601701.T_G.clim-gs10	1	27601701	T	G	0.0638723	UTR_5_PRIME	clim-gs10	AT1G73410	promoter	27600592	27602092	0	0	0	0	0	0	0	0	0	0	0	0	0	0	0	0	0	0	0	0	0	0	0	0	0	0	0	0	0	0	0	0	0	0	0	0	0	0
1.5294764.T_G.clim-bio4	1	5294764	T	G	0.0598802	NON_SYNONYMOUS_CODING	clim-bio4	AT1G15400	terminator	5294755	5296255	0	0	0	0	0	0	0	0	0	0	0	0	0	0	0	0	0	0	0	0	0	0	0	0	0	0	0	0	0	0	0	0	0	0	0	0	0	0
1.4143313.C_T.avrPphB	1	4143313	C	T	0.388889	NON_SYNONYMOUS_CODING	avrPphB	AT1G12220	promoter	4143256	4144756	0	0	0	0	0	0	0	0	0	0	0	0	0	0	0	0	0	0	0	0	0	0	0	0	0	0	0	0	0	0	0	0	0	0	0	0	0	0
1.4143314.A_G.avrPphB	1	4143314	A	G	0.388889	SYNONYMOUS_CODING	avrPphB	AT1G12220	promoter	4143256	4144756	0	0	0	0	0	0	0	0	0	0	0	0	0	0	0	0	0	0	0	0	0	0	0	0	0	0	0	0	0	0	0	0	0	0	0	0	0	0
1.4143573.T_C.avrPphB	1	4143573	T	C	0.388889	NON_SYNONYMOUS_CODING	avrPphB	AT1G12210	terminator	4143416	4144916	0	0	0	0	0	0	0	0	0	0	0	0	0	0	0	0	0	0	0	0	0	0	0	0	0	0	0	0	0	0	0	0	0	0	0	0	0	0
1.4143653.G_T.avrPphB	1	4143653	G	T	0.388889	INTERGENIC	avrPphB	AT1G12210	terminator	4143416	4144916	0	0	0	0	0	0	0	0	0	0	0	0	0	0	0	0	0	0	0	0	0	0	0	0	0	0	0	0	0	0	0	0	0	0	0	0	0	0
1.4143345.C_G.avrPphB	1	4143345	C	G	0.388889	NON_SYNONYMOUS_CODING	avrPphB	AT1G12220	promoter	4143256	4144756	0	0	0	0	0	0	0	0	0	0	0	0	0	0	0	0	0	0	0	0	0	0	0	0	0	0	0	0	0	0	0	0	0	0	0	0	0	0
1.4143687.T_C.avrPphB	1	4143687	T	C	0.388889	INTERGENIC	avrPphB	AT1G12210	terminator	4143416	4144916	0	0	0	0	0	0	0	0	0	0	0	0	0	0	0	0	0	0	0	0	0	0	0	0	0	0	0	0	0	0	0	0	0	0	0	0	0	0
1.4143700.T_C.avrPphB	1	4143700	T	C	0.388889	INTERGENIC	avrPphB	AT1G12210	terminator	4143416	4144916	0	0	0	0	0	0	0	0	0	0	0	0	0	0	0	0	0	0	0	0	0	0	0	0	0	0	0	0	0	0	0	0	0	0	0	0	0	0
1.4143346.A_C.avrPphB	1	4143346	A	C	0.388889	NON_SYNONYMOUS_CODING	avrPphB	AT1G12220	promoter	4143256	4144756	0	0	0	0	0	0	0	0	0	0	0	0	0	0	0	0	0	0	0	0	0	0	0	0	0	0	0	0	0	0	0	0	0	0	0	0	0	0
1.4143419.G_A.avrPphB	1	4143419	G	A	0.388889	SYNONYMOUS_CODING	avrPphB	AT1G12210	terminator	4143416	4144916	0	0	0	0	0	0	0	0	0	0	0	0	0	0	0	0	0	0	0	0	0	0	0	0	0	0	0	0	0	0	0	0	0	0	0	0	0	0
1.4143326.A_G.avrPphB	1	4143326	A	G	0.388889	SYNONYMOUS_CODING	avrPphB	AT1G12220	promoter	4143256	4144756	0	0	0	0	0	0	0	0	0	0	0	0	0	0	0	0	0	0	0	0	0	0	0	0	0	0	0	0	0	0	0	0	0	0	0	0	0	0
1.4143570.C_A.avrPphB	1	4143570	C	A	0.388889	NON_SYNONYMOUS_CODING	avrPphB	AT1G12210	terminator	4143416	4144916	0	0	0	0	0	0	0	0	0	0	0	0	0	0	0	0	0	0	0	0	0	0	0	0	0	0	0	0	0	0	0	0	0	0	0	0	0	0
1.4143588.A_T.avrPphB	1	4143588	A	T	0.388889	NON_SYNONYMOUS_CODING	avrPphB	AT1G12210	terminator	4143416	4144916	0	0	0	0	0	0	0	0	0	0	0	0	0	0	0	0	0	0	0	0	0	0	0	0	0	0	0	1	0	0	0	0	0	0	0	0	0	0
1.4143680.A_C.avrPphB	1	4143680	A	C	0.388889	INTERGENIC	avrPphB	AT1G12210	terminator	4143416	4144916	0	0	0	0	0	0	0	0	0	0	0	0	0	0	0	0	0	0	0	0	0	0	0	0	0	0	0	0	0	0	0	0	0	0	0	0	0	0
1.4143571.A_G.avrPphB	1	4143571	A	G	0.388889	NON_SYNONYMOUS_CODING	avrPphB	AT1G12210	terminator	4143416	4144916	0	0	0	0	0	0	0	0	0	0	0	0	0	0	0	0	0	0	0	0	0	0	0	0	0	0	0	0	0	0	0	0	0	0	0	0	0	0
1.4143581.C_T.avrPphB	1	4143581	C	T	0.388889	SYNONYMOUS_CODING	avrPphB	AT1G12210	terminator	4143416	4144916	0	0	0	0	0	0	0	0	0	0	0	0	0	0	0	0	0	0	0	0	0	0	0	0	0	0	0	0	0	0	0	0	0	0	0	0	0	0
1.4143686.G_A.avrPphB	1	4143686	G	A	0.388889	INTERGENIC	avrPphB	AT1G12210	terminator	4143416	4144916	0	0	0	0	0	0	0	0	0	0	0	0	0	0	0	0	0	0	0	0	0	0	0	0	0	0	0	0	0	0	0	0	0	0	0	0	0	0
1.4143725.A_G.avrPphB	1	4143725	A	G	0.388889	INTERGENIC	avrPphB	AT1G12210	terminator	4143416	4144916	0	0	0	0	0	0	0	0	0	0	0	0	0	0	0	0	0	0	0	0	0	0	0	0	0	0	0	0	0	0	0	0	0	0	0	0	0	0
1.16412833.T_A.clim-gs10	1	16412833	T	A	0.0518962	INTERGENIC	clim-gs10	AT1G43580	promoter	16412236	16413736	0	0	0	0	0	0	0	0	0	0	0	0	0	0	0	0	0	0	0	0	0	0	0	0	0	0	0	0	0	0	0	0	0	0	0	0	0	0
1.16430941.G_A.clim-gs10	1	16430941	G	A	0.0518962	INTERGENIC	clim-gs10	AT1G43620	promoter	16429787	16431287	0	0	0	0	0	0	0	0	0	0	0	0	0	0	0	0	0	0	0	0	0	0	0	0	0	0	0	0	0	0	0	0	0	0	0	0	0	0
1.16437995.G_A.clim-gs10	1	16437995	G	A	0.0518962	INTERGENIC	clim-gs10	AT1G43630	promoter	16437255	16438755	0	0	0	0	0	0	0	0	0	0	0	0	0	0	0	0	0	0	0	0	0	0	0	0	0	0	0	0	0	0	0	0	0	0	0	0	0	0
1.16497072.G_A.clim-gs10	1	16497072	G	A	0.0419162	NON_SYNONYMOUS_CODING	clim-gs10	AT1G43722	terminator	16496877	16498377	0	0	0	0	0	0	0	0	0	0	0	0	0	0	0	0	0	0	0	0	0	0	0	0	0	0	0	0	0	0	0	0	0	0	0	0	0	0
1.16453799.C_T.clim-gs10	1	16453799	C	T	0.0419162	SYNONYMOUS_CODING	clim-gs10	AT1G43665	promoter	16453304	16454804	0	0	0	0	0	0	0	0	0	0	0	0	0	0	0	0	0	0	0	0	0	0	0	0	0	0	0	0	0	0	0	0	0	0	0	0	0	0
1.16488105.T_C.clim-gs10	1	16488105	T	C	0.0419162	NON_SYNONYMOUS_CODING	clim-gs10	AT1G43710	promoter	16487962	16489462	0	0	0	0	0	0	0	0	0	0	0	0	0	0	0	0	0	0	-1	0	0	0	0	0	0	0	0	0	0	0	0	0	0	0	0	0	0	0
1.16671680.G_C.clim-gs10	1	16671680	G	C	0.0598802	INTERGENIC	clim-gs10	AT1G43950	terminator	16671581	16673081	0	0	0	0	0	0	0	0	0	0	0	0	0	0	0	0	0	0	0	0	0	0	0	0	0	0	0	0	1	0	0	0	0	0	0	0	0	0
1.16674462.C_T.clim-gs10	1	16674462	C	T	0.0598802	INTERGENIC	clim-gs10	AT1G43950	promoter	16673452	16674952	0	0	0	0	0	0	0	0	0	0	0	0	0	0	0	0	0	0	0	0	0	0	0	0	0	0	0	0	0	0	0	0	0	0	0	0	0	0
1.16689621.A_G.clim-gs10	1	16689621	A	G	0.0598802	INTERGENIC	clim-gs10	AT1G43980	promoter	16689063	16690563	0	0	0	0	0	0	0	0	0	0	0	0	0	0	0	0	0	0	0	0	0	0	0	0	0	0	0	0	0	0	0	0	0	0	0	0	0	0
1.29671337.A_T.clim-gs10	1	29671337	A	T	0.0399202	.	clim-gs10	AT1G78920	promoter	29670412	29671912	0	0	0	0	0	0	0	0	0	0	0	0	0	0	0	0	0	0	0	0	0	-1	0	0	-1	0	0	0	0	0	0	0	0	0	0	0	0	0
1.29680136.G_T.clim-gs10	1	29680136	G	T	0.0399202	SYNONYMOUS_CODING	clim-gs10	AT1G78940	terminator	29679781	29681281	0	0	0	0	0	0	0	0	0	0	0	0	0	0	0	0	0	0	0	0	0	0	0	0	0	0	0	0	0	0	0	0	0	0	0	0	0	0
1.29680789.A_T.clim-gs10	1	29680789	A	T	0.0399202	INTERGENIC	clim-gs10	AT1G78930	promoter	29680257	29681757	0	0	0	0	0	0	0	0	0	0	0	0	0	0	0	0	0	0	0	0	0	0	0	0	0	0	0	0	0	0	0	0	0	0	0	0	0	0
1.29672188.T_G.clim-gs10	1	29672188	T	G	0.0399202	UTR_5_PRIME	clim-gs10	AT1G78915	promoter	29670841	29672341	0	0	0	0	0	0	0	0	0	0	0	0	0	0	0	0	0	0	0	0	0	0	0	0	0	0	0	0	0	0	0	0	0	0	0	0	0	0
1.29667961.C_G.clim-gs10	1	29667961	C	G	0.0399202	INTRON	clim-gs10	AT1G78915	terminator	29666564	29668064	0	0	0	0	0	0	0	0	0	0	0	0	0	0	0	0	0	0	0	0	0	0	0	0	0	0	0	0	0	0	0	0	0	0	0	0	0	0
1.29668743.C_T.clim-gs10	1	29668743	C	T	0.0399202	INTRON	clim-gs10	AT1G09837	promoter	29667452	29668952	0	0	0	0	0	0	0	0	0	0	0	0	0	0	0	0	0	0	0	0	0	0	0	0	0	0	0	0	0	0	0	0	0	0	0	0	0	0
1.29679987.A_C.clim-gs10	1	29679987	A	C	0.0399202	NON_SYNONYMOUS_CODING	clim-gs10	AT1G78940	terminator	29679781	29681281	0	0	0	0	0	0	0	0	0	0	0	0	0	0	0	0	0	0	0	0	0	0	0	0	0	0	0	0	0	0	0	0	0	0	0	0	0	0
1.29643731.T_C.clim-gs10	1	29643731	T	C	0.0419162	INTERGENIC	clim-gs10	AT1G78850	promoter	29643035	29644535	-1	0	0	0	0	0	0	0	0	0	0	0	0	0	0	0	0	0	0	0	0	0	0	0	0	0	0	0	0	0	0	0	0	0	0	0	0	0
1.27646562.G_A.clim-tmin2	1	27646562	G	A	0.0663984	SYNONYMOUS_CODING	clim-tmin2	AT1G73540	promoter	27646243	27647743	0	0	0	0	0	0	0	0	0	0	0	0	0	0	0	0	0	0	0	0	0	0	0	0	0	0	0	0	0	0	0	0	0	0	0	0	0	0
1.16548078.G_A.clim-gs10	1	16548078	G	A	0.0538922	INTERGENIC	clim-gs10	AT1G43770	promoter	16547416	16548916	0	0	0	0	0	0	0	0	0	0	0	0	0	0	0	0	0	0	0	0	0	0	0	0	0	0	0	0	0	0	0	0	0	0	0	0	0	0
1.28888133.G_A.clim-gs10	1	28888133	G	A	0.0139721	INTERGENIC	clim-gs10	AT1G76910	terminator	28887604	28889104	0	0	0	0	0	0	0	0	0	-1	0	0	0	0	0	0	0	0	0	0	0	0	0	0	0	0	0	0	0	0	0	0	0	0	0	0	0	0
1.3122909.A_G.clim-gs10	1	3122909	A	G	0.0499002	INTERGENIC	clim-gs10	AT1G09640	terminator	3122042	3123542	0	0	0	0	0	0	0	0	0	0	0	0	0	0	0	0	0	0	0	0	0	0	0	0	0	0	0	0	0	0	0	0	0	0	0	0	0	0
1.16474946.C_T.clim-gs10	1	16474946	C	T	0.0538922	INTERGENIC	clim-gs10	AT1G07193	terminator	16473813	16475313	0	0	0	0	0	0	0	0	0	0	0	0	0	0	0	0	0	0	0	0	0	0	0	0	0	0	0	0	0	0	0	0	0	0	0	0	0	0
1.16485972.G_A.clim-gs10	1	16485972	G	A	0.0538922	SYNONYMOUS_CODING	clim-gs10	AT1G43710	terminator	16485229	16486729	0	0	0	0	0	0	0	0	0	0	0	0	0	0	0	0	0	0	0	0	0	0	0	0	0	0	0	0	0	0	0	0	0	0	0	0	0	0
1.16483439.A_C.clim-gs10	1	16483439	A	C	0.0538922	INTERGENIC	clim-gs10	AT1G43690	terminator	16482359	16483859	0	0	0	0	0	0	0	0	0	0	0	0	0	0	0	0	0	0	0	0	0	0	0	0	0	0	0	0	0	0	0	0	0	1	0	0	0	0
1.16477582.C_T.clim-gs10	1	16477582	C	T	0.0538922	INTERGENIC	clim-gs10	AT1G43690	promoter	16477158	16478658	0	0	0	0	0	0	0	0	0	0	0	0	0	0	0	0	0	0	0	0	0	0	0	0	0	0	0	0	0	0	0	0	0	0	0	0	0	0
1.2473150.G_A.clim-gs10	1	2473150	G	A	0.0538922	INTERGENIC	clim-gs10	AT1G07980	terminator	2472164	2473664	0	0	0	0	0	0	0	0	0	0	0	0	0	0	0	0	0	0	0	0	0	0	0	0	0	0	0	0	0	0	0	0	0	0	0	0	0	0
1.5285365.G_A.clim-bio4	1	5285365	G	A	0.0578842	INTERGENIC	clim-bio4	AT1G15360	terminator	5284236	5285736	0	0	0	0	0	0	0	0	0	0	0	0	0	0	0	0	0	0	0	0	0	0	0	0	0	0	0	0	0	0	0	0	0	0	0	0	0	0
1.5282843.T_A.clim-bio4	1	5282843	T	A	0.0578842	INTERGENIC	clim-bio4	AT1G15360	promoter	5282267	5283767	0	0	0	0	0	0	0	0	0	0	0	0	0	0	0	0	0	0	0	0	0	0	0	0	0	0	0	0	0	0	0	0	0	0	0	0	0	0
1.5284692.T_A.clim-bio4	1	5284692	T	A	0.0578842	INTERGENIC	clim-bio4	AT1G15360	terminator	5284236	5285736	0	0	0	0	0	0	0	0	0	0	0	0	0	0	0	0	0	0	0	0	0	0	0	0	0	0	0	0	0	0	0	0	0	0	0	0	0	0
1.5284693.T_C.clim-bio4	1	5284693	T	C	0.0578842	INTERGENIC	clim-bio4	AT1G15360	terminator	5284236	5285736	0	0	0	0	0	0	0	0	0	0	0	0	0	0	0	0	0	0	0	0	0	0	0	0	0	0	0	0	0	0	0	0	0	0	0	0	0	0
1.24716652.C_T.clim-gs10	1	24716652	C	T	0.0459082	NON_SYNONYMOUS_CODING	clim-gs10	AT1G66300	terminator	24715304	24716804	0	0	0	0	0	0	0	0	0	0	0	0	0	0	0	0	0	0	0	0	0	0	0	0	0	0	0	0	0	0	0	0	0	0	0	0	0	0
1.16538627.G_A.clim-bio9	1	16538627	G	A	0.052	INTERGENIC	clim-bio9	AT1G43765	terminator	16537591	16539091	0	0	0	0	0	0	0	0	0	0	0	0	0	0	0	0	0	0	0	0	0	0	0	0	0	0	0	0	0	0	0	0	0	0	0	0	0	0
1.4141361.A_G.avrPphB	1	4141361	A	G	0.4	NON_SYNONYMOUS_CODING	avrPphB	AT1G12211	terminator	4139874	4141374	0	0	0	0	0	0	0	0	0	0	0	0	0	0	0	0	0	0	0	0	0	0	0	0	0	0	0	0	0	0	0	0	0	0	0	0	0	0
1.4141374.G_A.avrPphB	1	4141374	G	A	0.4	NON_SYNONYMOUS_CODING	avrPphB	AT1G12211	terminator	4139874	4141374	0	0	0	0	0	0	0	0	0	0	0	0	0	0	0	0	0	0	0	0	0	0	0	0	0	0	0	0	0	0	0	0	0	0	0	0	0	0
1.4141245.T_C.avrPphB	1	4141245	T	C	0.4	SYNONYMOUS_CODING	avrPphB	AT1G12211	terminator	4139874	4141374	0	0	0	0	0	0	0	0	0	0	0	0	0	0	0	0	0	0	0	0	0	0	0	0	0	0	0	0	0	0	0	0	0	0	0	0	0	0
1.4141316.A_G.avrPphB	1	4141316	A	G	0.4	SYNONYMOUS_CODING	avrPphB	AT1G12211	terminator	4139874	4141374	0	0	0	0	0	0	0	0	0	0	0	0	0	0	0	0	0	0	0	0	0	0	0	0	0	0	0	0	0	0	0	0	0	0	0	0	0	0
1.4141351.T_A.avrPphB	1	4141351	T	A	0.4	NON_SYNONYMOUS_CODING	avrPphB	AT1G12211	terminator	4139874	4141374	0	0	0	0	0	0	0	0	0	0	0	0	0	0	0	0	0	0	0	0	0	0	0	0	0	0	0	0	0	0	0	0	0	0	0	0	0	0
1.4141359.A_G.avrPphB	1	4141359	A	G	0.4	NON_SYNONYMOUS_CODING	avrPphB	AT1G12211	terminator	4139874	4141374	0	0	0	0	0	0	0	0	0	0	0	0	0	0	0	0	0	0	0	0	0	0	0	0	0	0	0	0	0	0	0	0	0	0	0	0	0	0
1.4141199.C_T.avrPphB	1	4141199	C	T	0.4	SYNONYMOUS_CODING	avrPphB	AT1G12211	terminator	4139874	4141374	0	0	0	0	0	0	0	0	0	0	0	0	0	0	0	0	0	0	0	0	0	-1	0	0	0	0	0	0	0	0	0	0	0	0	0	0	0	0
1.4141136.T_G.avrPphB	1	4141136	T	G	0.4	SYNONYMOUS_CODING	avrPphB	AT1G12200	terminator	4139658	4141158	0	0	0	0	0	0	0	0	0	0	0	0	0	0	0	0	0	0	0	0	0	0	0	0	0	0	0	0	0	0	0	0	0	0	0	0	0	0
1.4141282.T_G.avrPphB	1	4141282	T	G	0.4	NON_SYNONYMOUS_CODING	avrPphB	AT1G12211	terminator	4139874	4141374	0	0	0	0	0	0	0	0	0	-1	0	0	0	0	0	0	0	0	0	0	0	0	0	0	0	0	0	0	0	0	0	0	0	0	0	0	0	0
1.4141146.A_C.avrPphB	1	4141146	A	C	0.4	SYNONYMOUS_CODING	avrPphB	AT1G12200	terminator	4139658	4141158	0	-1	0	0	0	0	0	0	0	0	0	0	0	0	0	0	0	0	0	0	0	0	0	0	0	0	0	0	0	0	0	0	0	0	0	0	0	0
1.4141227.A_C.avrPphB	1	4141227	A	C	0.4	NON_SYNONYMOUS_CODING	avrPphB	AT1G12211	terminator	4139874	4141374	0	0	0	0	0	0	0	0	0	0	0	0	0	0	0	0	0	0	0	0	0	0	0	0	0	0	0	0	0	0	0	0	0	0	0	0	0	0
1.16674418.G_A.clim-gs10	1	16674418	G	A	0.0618762	INTERGENIC	clim-gs10	AT1G43950	promoter	16673452	16674952	0	0	0	0	0	0	0	0	0	0	0	0	0	0	0	0	0	0	0	0	0	0	0	0	0	0	0	0	0	0	0	0	0	0	0	0	0	0
1.16680609.C_T.clim-gs10	1	16680609	C	T	0.0618762	INTERGENIC	clim-gs10	AT1G43970	promoter	16680268	16681768	0	0	0	0	0	0	0	0	0	0	0	0	0	0	0	0	0	0	0	0	0	0	0	0	0	0	0	0	0	0	0	0	0	0	0	0	0	0
1.16674580.C_G.clim-gs10	1	16674580	C	G	0.0618762	INTERGENIC	clim-gs10	AT1G43950	promoter	16673452	16674952	0	0	0	0	0	0	0	0	0	0	0	0	0	0	0	0	0	0	0	0	0	0	0	0	0	0	0	0	0	0	0	0	0	0	0	0	0	0
1.16680724.G_T.clim-gs10	1	16680724	G	T	0.0618762	INTERGENIC	clim-gs10	AT1G43970	promoter	16680268	16681768	0	0	0	0	0	0	0	0	0	0	0	0	0	0	0	0	0	0	0	0	0	0	0	0	0	0	0	0	0	0	0	0	0	0	0	0	0	0
1.16680645.A_T.clim-gs10	1	16680645	A	T	0.0618762	INTERGENIC	clim-gs10	AT1G43970	promoter	16680268	16681768	0	0	0	0	0	0	0	0	0	0	0	0	0	0	0	0	0	0	0	0	0	0	0	0	0	0	0	0	0	0	0	0	0	0	0	0	0	0
1.16680653.G_A.clim-gs10	1	16680653	G	A	0.0618762	INTERGENIC	clim-gs10	AT1G43970	promoter	16680268	16681768	0	0	0	0	0	0	0	0	0	0	0	0	0	0	0	0	0	0	0	0	0	0	0	0	0	0	0	-1	0	0	0	0	0	0	0	0	0	0
1.16672904.G_A.clim-gs10	1	16672904	G	A	0.0618762	NON_SYNONYMOUS_CODING	clim-gs10	AT1G43950	terminator	16671581	16673081	0	0	0	0	0	0	0	0	0	0	0	0	0	0	0	0	0	0	0	0	0	0	0	0	0	0	0	0	0	0	0	0	0	0	0	0	0	0
1.27643635.C_T.clim-gs10	1	27643635	C	T	0.0738523	UTR_3_PRIME	clim-gs10	AT1G73530	terminator	27642608	27644108	0	0	0	0	0	0	0	0	0	0	0	0	0	0	-1	0	0	0	0	0	0	0	0	0	0	0	0	0	0	0	0	0	0	0	0	0	0	0
1.4140947.T_G.avrPphB	1	4140947	T	G	0.444444	INTERGENIC	avrPphB	AT1G12200	terminator	4139658	4141158	0	0	0	0	0	0	0	0	0	0	0	0	0	0	0	0	0	0	0	0	0	0	0	0	0	0	0	0	0	0	0	0	0	0	0	0	0	0
1.20226605.C_T.YEL	1	20226605	C	T	0.0842105	INTERGENIC	YEL	AT1G54180	promoter	20226167	20227667	0	0	0	0	0	0	0	0	0	0	0	0	0	0	0	0	0	0	0	0	0	0	0	0	0	0	0	0	0	0	0	0	0	0	0	0	0	0
1.17476757.T_A.clim-gs10	1	17476757	T	A	0.0459082	INTERGENIC	clim-gs10	AT1G47570	promoter	17476578	17478078	0	0	0	0	0	0	0	0	0	0	0	0	0	0	0	0	0	0	0	0	0	0	0	0	0	0	0	0	0	0	0	0	0	0	0	0	0	0
1.17510424.A_G.clim-gs10	1	17510424	A	G	0.0459082	INTERGENIC	clim-gs10	AT1G47620	promoter	17509231	17510731	0	0	0	0	0	0	0	0	0	0	0	0	0	0	0	0	0	0	0	0	0	0	0	0	0	0	0	-1	0	0	0	0	0	0	0	0	0	0
1.17456883.G_A.clim-gs10	1	17456883	G	A	0.0459082	INTERGENIC	clim-gs10	AT1G47550	promoter	17455986	17457486	0	0	0	0	0	0	0	0	0	0	0	0	0	0	0	0	0	0	0	0	0	0	0	0	0	0	0	0	0	0	0	0	0	0	0	0	0	0
1.17456824.T_C.clim-gs10	1	17456824	T	C	0.0459082	INTERGENIC	clim-gs10	AT1G47550	promoter	17455986	17457486	0	0	0	0	0	0	0	0	0	0	0	0	0	0	0	0	0	0	0	0	0	0	0	0	0	0	0	0	0	0	0	0	0	0	0	0	0	0
1.4147892.A_T.avrPphB	1	4147892	A	T	0.377778	UTR_3_PRIME	avrPphB	AT1G12230	promoter	4146961	4148461	0	0	0	0	0	0	0	0	0	0	0	0	0	0	0	0	0	0	0	0	0	0	0	0	0	0	0	0	0	0	0	0	0	0	0	0	0	0
1.4147900.C_T.avrPphB	1	4147900	C	T	0.377778	UTR_3_PRIME	avrPphB	AT1G12230	promoter	4146961	4148461	0	0	0	0	0	0	0	0	0	0	0	0	0	0	0	0	0	0	0	0	0	0	0	0	0	0	0	0	0	0	0	0	0	0	0	0	0	0
1.4147907.G_A.avrPphB	1	4147907	G	A	0.377778	UTR_3_PRIME	avrPphB	AT1G12230	promoter	4146961	4148461	0	0	0	0	0	0	0	0	0	0	0	0	0	0	0	0	0	0	0	0	0	0	0	0	0	0	0	0	0	0	0	0	0	0	0	0	0	0
1.4147997.T_C.avrPphB	1	4147997	T	C	0.377778	UTR_5_PRIME	avrPphB	AT1G12230	promoter	4146961	4148461	0	0	0	0	0	0	0	0	0	0	-1	0	0	0	0	0	0	0	0	0	0	0	0	0	0	0	0	0	0	0	0	0	0	0	0	0	0	0
1.4148631.A_T.avrPphB	1	4148631	A	T	0.377778	INTRON	avrPphB	AT1G12220	terminator	4147439	4148939	0	0	0	0	0	0	0	0	0	0	0	0	0	0	0	0	0	0	0	0	0	0	0	0	0	0	0	0	0	0	0	0	0	0	0	0	0	0
1.4148862.A_T.avrPphB	1	4148862	A	T	0.377778	INTRON	avrPphB	AT1G12220	terminator	4147439	4148939	0	0	0	0	0	0	0	0	0	0	0	0	0	0	0	0	0	0	0	0	0	0	0	0	0	0	0	0	0	0	0	0	0	0	0	0	0	0
1.4148873.A_T.avrPphB	1	4148873	A	T	0.377778	INTRON	avrPphB	AT1G12220	terminator	4147439	4148939	0	0	0	0	0	0	0	0	0	0	0	0	0	0	0	0	0	0	0	0	0	0	0	0	0	0	0	0	0	0	0	0	0	0	0	0	0	0
1.4148915.C_G.avrPphB	1	4148915	C	G	0.377778	INTRON	avrPphB	AT1G12220	terminator	4147439	4148939	0	0	0	0	0	0	0	0	0	0	0	0	0	0	0	0	0	0	0	0	0	0	0	0	0	0	0	0	0	0	0	0	0	0	0	0	0	0
1.4147775.C_A.avrPphB	1	4147775	C	A	0.377778	UTR_3_PRIME	avrPphB	AT1G12230	promoter	4146961	4148461	0	0	0	0	0	0	0	0	0	0	0	0	0	0	0	0	0	0	0	0	0	0	0	0	0	0	0	0	0	0	0	0	0	0	0	0	0	0
1.4148020.T_G.avrPphB	1	4148020	T	G	0.377778	UTR_5_PRIME	avrPphB	AT1G12230	promoter	4146961	4148461	0	0	0	0	0	0	0	0	0	0	0	0	0	0	0	0	0	0	0	0	0	0	0	0	0	0	0	0	0	0	0	0	0	0	0	0	0	0
1.4148097.A_G.avrPphB	1	4148097	A	G	0.377778	SYNONYMOUS_CODING	avrPphB	AT1G12230	promoter	4146961	4148461	0	0	0	0	0	0	0	0	0	0	0	0	0	0	0	0	0	0	0	0	0	0	0	0	0	0	0	0	0	0	0	0	0	0	0	0	0	0
1.4148313.T_A.avrPphB	1	4148313	T	A	0.377778	SYNONYMOUS_CODING	avrPphB	AT1G12230	promoter	4146961	4148461	0	0	0	0	0	0	0	0	0	0	0	0	0	0	0	0	0	0	0	0	0	0	0	0	0	0	0	0	0	0	0	0	0	0	0	0	0	0
1.4147734.C_T.avrPphB	1	4147734	C	T	0.377778	UTR_3_PRIME	avrPphB	AT1G12230	promoter	4146961	4148461	0	0	0	0	0	0	0	0	0	0	0	0	0	0	0	0	0	0	0	0	0	0	0	0	0	0	0	0	0	0	0	0	0	0	0	0	0	0
1.4147738.G_T.avrPphB	1	4147738	G	T	0.377778	UTR_3_PRIME	avrPphB	AT1G12230	promoter	4146961	4148461	0	0	0	0	0	0	0	0	0	0	0	0	0	0	0	0	0	0	0	0	0	0	0	0	0	0	0	0	0	0	0	0	0	0	0	0	0	0
1.4147832.A_T.avrPphB	1	4147832	A	T	0.377778	UTR_3_PRIME	avrPphB	AT1G12230	promoter	4146961	4148461	0	0	0	0	0	0	0	0	0	0	0	0	0	0	0	0	0	0	0	0	0	0	0	0	0	0	0	0	0	0	0	0	0	0	0	0	0	0
1.4147899.A_T.avrPphB	1	4147899	A	T	0.377778	UTR_3_PRIME	avrPphB	AT1G12230	promoter	4146961	4148461	0	0	0	0	0	0	0	0	0	0	0	0	0	0	0	0	0	0	0	0	0	0	0	0	0	0	0	0	0	0	0	0	0	0	0	0	0	0
1.4148314.G_T.avrPphB	1	4148314	G	T	0.377778	NON_SYNONYMOUS_CODING	avrPphB	AT1G12230	promoter	4146961	4148461	0	0	0	0	0	0	0	0	0	0	0	0	0	0	0	0	0	0	0	0	0	0	0	0	0	0	0	0	0	0	0	0	0	0	0	0	0	0
1.4148473.C_A.avrPphB	1	4148473	C	A	0.377778	INTRON	avrPphB	AT1G12220	terminator	4147439	4148939	0	0	0	0	0	0	0	0	0	0	0	0	0	0	0	0	0	0	0	0	0	0	0	0	0	0	0	0	0	0	0	0	0	0	0	0	0	0
1.4148609.A_C.avrPphB	1	4148609	A	C	0.377778	INTRON	avrPphB	AT1G12220	terminator	4147439	4148939	0	0	0	0	0	0	0	0	0	0	0	0	0	0	0	0	0	0	0	0	0	0	0	0	0	0	0	0	0	0	0	0	0	0	0	0	0	0
1.4148683.G_C.avrPphB	1	4148683	G	C	0.377778	INTRON	avrPphB	AT1G12220	terminator	4147439	4148939	0	0	0	0	0	0	0	0	0	0	0	0	0	0	0	0	0	0	0	0	0	0	0	0	0	0	0	0	0	0	0	0	0	0	0	0	0	0
1.4148927.G_T.avrPphB	1	4148927	G	T	0.377778	INTRON	avrPphB	AT1G12220	terminator	4147439	4148939	0	0	0	0	0	0	0	0	0	0	0	0	0	0	0	0	0	0	0	0	0	0	0	0	0	0	0	0	0	0	0	0	0	0	0	0	0	0
1.4148043.G_A.avrPphB	1	4148043	G	A	0.377778	UTR_5_PRIME	avrPphB	AT1G12230	promoter	4146961	4148461	0	0	0	0	0	0	0	0	0	0	0	0	0	0	0	0	0	0	0	0	0	0	0	0	0	1	0	0	0	0	0	0	0	0	0	0	0	0
1.4148102.G_A.avrPphB	1	4148102	G	A	0.377778	NON_SYNONYMOUS_CODING	avrPphB	AT1G12230	promoter	4146961	4148461	0	0	0	0	0	0	0	0	0	0	0	0	0	0	0	0	0	0	0	0	0	0	0	0	0	0	0	0	0	0	0	0	0	0	0	0	0	0
1.4148262.T_C.avrPphB	1	4148262	T	C	0.377778	SYNONYMOUS_CODING	avrPphB	AT1G12230	promoter	4146961	4148461	0	-1	0	0	0	0	0	0	0	0	0	0	0	0	0	0	0	0	0	0	0	0	0	0	0	0	0	0	0	0	0	0	0	0	0	0	0	0
1.4148676.T_A.avrPphB	1	4148676	T	A	0.377778	INTRON	avrPphB	AT1G12220	terminator	4147439	4148939	0	0	0	0	0	0	0	0	0	0	0	0	0	0	0	0	0	0	0	0	0	0	0	0	0	0	0	0	0	0	0	0	0	0	0	0	0	0
1.4148907.G_T.avrPphB	1	4148907	G	T	0.377778	INTRON	avrPphB	AT1G12220	terminator	4147439	4148939	0	0	0	0	0	0	0	0	0	0	0	0	0	0	0	0	0	0	0	0	0	0	0	0	0	0	0	0	0	0	0	0	0	0	0	0	0	0
1.4147732.G_A.avrPphB	1	4147732	G	A	0.377778	UTR_3_PRIME	avrPphB	AT1G12230	promoter	4146961	4148461	0	0	0	0	0	0	0	0	0	0	0	0	0	0	0	0	0	0	0	0	0	0	0	0	0	0	0	0	0	0	0	0	0	0	0	0	0	0
1.4147765.G_A.avrPphB	1	4147765	G	A	0.377778	UTR_3_PRIME	avrPphB	AT1G12230	promoter	4146961	4148461	0	0	0	0	0	0	0	0	0	0	0	0	0	0	0	0	0	0	0	0	0	0	0	0	0	0	0	0	0	0	0	0	0	0	0	0	0	0
1.4148132.A_C.avrPphB	1	4148132	A	C	0.377778	INTRON	avrPphB	AT1G12230	promoter	4146961	4148461	0	0	0	0	0	0	0	0	0	0	0	-1	0	0	0	0	0	0	0	0	0	0	0	0	0	0	0	0	0	0	0	0	0	0	0	0	0	0
1.4148890.T_G.avrPphB	1	4148890	T	G	0.377778	INTRON	avrPphB	AT1G12220	terminator	4147439	4148939	0	0	0	0	0	0	0	0	0	0	0	0	0	0	0	0	0	0	0	0	0	0	0	0	0	0	0	0	0	0	0	0	0	0	0	0	0	0
1.16547513.T_C.clim-gs10	1	16547513	T	C	0.0558882	INTERGENIC	clim-gs10	AT1G43770	promoter	16547416	16548916	0	0	0	0	0	0	0	0	0	0	0	0	0	0	0	0	0	0	0	0	0	0	0	0	0	0	0	0	0	0	0	0	0	0	0	0	0	0
1.16624817.C_T.clim-gs10	1	16624817	C	T	0.0499002	INTERGENIC	clim-gs10	AT1G43860	promoter	16624004	16625504	0	0	0	0	0	0	0	0	0	0	0	0	0	0	0	0	0	0	0	0	0	0	0	0	0	0	0	0	0	0	0	0	0	0	0	0	0	0
1.16531751.C_T.clim-gs10	1	16531751	C	T	0.0499002	.	clim-gs10	AT1G43760	promoter	16530565	16532065	0	0	0	0	0	0	0	0	0	0	0	0	0	0	0	0	0	0	0	0	0	0	0	0	0	0	0	1	0	0	0	0	0	0	0	0	0	0
1.16478069.G_A.clim-gs10	1	16478069	G	A	0.0578842	INTERGENIC	clim-gs10	AT1G43690	promoter	16477158	16478658	0	0	0	0	0	0	0	0	0	0	0	0	0	0	0	0	0	0	0	0	0	0	0	0	0	0	0	0	0	0	0	0	0	0	0	0	0	0
1.16474816.C_T.clim-gs10	1	16474816	C	T	0.0558882	INTERGENIC	clim-gs10	AT1G07193	terminator	16473813	16475313	0	0	0	0	0	0	0	0	0	0	0	0	0	0	0	0	0	0	0	0	0	0	0	0	0	0	0	0	0	0	0	0	0	0	0	0	0	0
1.16586465.C_A.clim-gs10	1	16586465	C	A	0.0538922	.	clim-gs10	AT1G43820	promoter	16585276	16586776	0	0	0	0	0	0	0	0	0	0	0	0	0	0	0	0	0	0	0	0	0	0	0	0	0	0	0	0	0	0	0	0	0	0	0	0	0	0
1.16274861.G_T.clim-gs10	1	16274861	G	T	0.0479042	INTERGENIC	clim-gs10	AT1G43190	terminator	16274107	16275607	0	0	0	0	0	0	0	0	0	0	0	0	0	0	0	0	0	0	0	0	0	0	0	0	0	0	0	0	0	0	0	0	0	0	0	0	0	0
1.16529020.C_T.clim-gs10	1	16529020	C	T	0.0499002	NON_SYNONYMOUS_CODING	clim-gs10	AT1G43760	terminator	16527879	16529379	0	0	0	0	0	0	0	0	0	0	0	0	0	0	0	0	0	0	0	0	0	0	0	0	0	0	0	0	0	0	0	0	0	0	0	0	0	0
1.16446695.A_G.clim-gs10	1	16446695	A	G	0.0538922	SYNONYMOUS_CODING	clim-gs10	AT1G43650	promoter	16446418	16447918	0	0	0	0	0	0	0	0	0	0	0	0	0	0	0	0	0	0	0	0	0	0	0	0	0	0	0	0	0	0	0	0	0	0	0	0	0	0
1.2637386.G_A.clim-gs10	1	2637386	G	A	0.0518962	INTRON	clim-gs10	AT1G08370	promoter	2637036	2638536	0	0	0	0	0	0	0	0	0	0	0	0	0	0	0	0	0	0	0	0	0	0	0	0	0	0	0	0	0	0	0	0	0	0	0	0	0	0
1.1013847.C_A.clim-bio9	1	1013847	C	A	0.014	.	clim-bio9	AT1G03960	promoter	1012642	1014142	0	0	0	0	0	0	0	0	0	0	0	0	0	0	0	0	0	0	0	0	0	0	0	0	0	0	0	0	0	0	0	0	0	0	0	0	0	0
1.16413474.C_T.clim-gs10	1	16413474	C	T	0.0439122	INTERGENIC	clim-gs10	AT1G43580	promoter	16412236	16413736	0	0	0	0	0	0	0	0	0	0	0	0	0	0	0	0	0	0	0	0	0	0	0	0	0	0	0	0	0	0	0	0	0	0	0	0	0	0
1.17868964.T_C.clim-gs10	1	17868964	T	C	0.0459082	INTRON	clim-gs10	AT1G48350	terminator	17867932	17869432	0	0	0	0	0	0	0	0	0	0	0	0	0	0	0	0	0	0	0	0	0	0	0	0	0	0	0	0	0	0	0	0	0	0	0	0	0	0
1.17868607.C_A.clim-gs10	1	17868607	C	A	0.0459082	INTERGENIC	clim-gs10	AT1G48350	terminator	17867932	17869432	0	0	0	0	0	0	0	0	0	-1	0	0	0	0	0	0	0	0	0	0	0	0	0	0	0	0	0	0	0	0	0	0	0	0	0	0	0	0
1.17866762.T_A.clim-gs10	1	17866762	T	A	0.0459082	INTERGENIC	clim-gs10	AT1G48350	promoter	17866101	17867601	0	0	0	0	0	0	0	0	0	0	0	0	0	0	0	0	0	0	0	0	0	0	0	0	0	0	0	0	0	0	0	0	0	0	0	0	0	0
1.17869319.A_G.clim-gs10	1	17869319	A	G	0.0459082	NON_SYNONYMOUS_CODING	clim-gs10	AT1G48350	terminator	17867932	17869432	0	0	0	0	0	0	0	0	0	0	0	0	0	0	0	0	0	0	0	0	0	0	0	0	0	0	0	0	0	0	0	0	0	0	0	0	0	0
1.16483814.C_T.clim-gs10	1	16483814	C	T	0.0558882	INTERGENIC	clim-gs10	AT1G43690	terminator	16482359	16483859	0	0	0	0	0	0	0	0	0	0	0	0	0	0	0	0	0	0	0	0	0	0	0	0	0	0	0	0	0	0	0	0	0	0	0	0	0	0
1.3145203.C_G.clim-gs10	1	3145203	C	G	0.0518962	SYNONYMOUS_CODING	clim-gs10	AT1G09710	terminator	3143881	3145381	0	0	0	0	0	0	0	0	0	0	0	0	0	0	0	0	0	0	0	0	0	0	0	0	0	0	0	0	0	0	0	0	0	0	0	0	0	0
1.3165559.T_A.clim-gs10	1	3165559	T	A	0.0518962	SYNONYMOUS_CODING	clim-gs10	AT1G09780	terminator	3164369	3165869	0	0	0	0	0	0	0	0	0	0	0	0	0	0	0	0	0	0	0	0	0	0	0	0	0	0	0	0	0	0	0	0	0	0	0	0	0	0
1.3133193.T_G.clim-gs10	1	3133193	T	G	0.0518962	NON_SYNONYMOUS_CODING	clim-gs10	AT1G09680	terminator	3132884	3134384	0	0	0	0	0	0	0	0	0	1	0	0	0	0	0	0	0	0	0	0	0	0	0	0	0	0	0	0	0	0	0	0	0	0	0	0	0	0
1.3156505.T_C.clim-gs10	1	3156505	T	C	0.0518962	INTERGENIC	clim-gs10	AT1G09750	promoter	3156500	3158000	0	0	1	0	0	0	0	0	0	0	0	0	0	0	0	0	0	0	0	0	0	0	0	0	0	0	0	0	0	0	0	0	0	0	0	0	0	0
1.3184950.T_G.clim-gs10	1	3184950	T	G	0.0518962	INTERGENIC	clim-gs10	AT1G09810	promoter	3183724	3185224	0	0	0	0	0	0	0	0	0	0	0	0	0	0	0	0	0	0	0	0	0	0	0	0	0	0	0	0	0	0	0	0	0	0	0	0	0	0
1.3131239.G_C.clim-gs10	1	3131239	G	C	0.0518962	INTERGENIC	clim-gs10	AT1G09660	promoter	3130594	3132094	0	0	0	0	0	0	0	0	0	0	0	0	0	0	0	0	0	0	0	0	0	0	0	0	0	0	0	0	0	0	0	0	0	0	0	0	0	0
1.3132528.A_G.clim-gs10	1	3132528	A	G	0.0518962	INTERGENIC	clim-gs10	AT1G09665	promoter	3132007	3133507	0	0	0	0	0	0	0	0	0	0	0	0	0	0	0	0	0	0	0	0	0	0	0	0	0	0	0	0	0	0	0	0	0	0	0	0	0	0
1.3136721.A_C.clim-gs10	1	3136721	A	C	0.0518962	INTRON	clim-gs10	AT1G09680	promoter	3135476	3136976	0	0	0	0	0	0	0	0	0	0	0	0	0	0	0	0	0	0	0	0	0	0	0	0	0	0	0	0	0	0	0	0	0	0	0	0	0	0
1.3137005.C_T.clim-gs10	1	3137005	C	T	0.0518962	INTRON	clim-gs10	AT1G09700	terminator	3136648	3138148	0	0	0	0	0	0	0	0	0	0	0	0	0	0	0	0	0	0	0	0	0	0	0	0	0	0	0	0	-1	0	0	0	0	0	0	0	0	0
1.3161344.C_A.clim-gs10	1	3161344	C	A	0.0518962	INTRON	clim-gs10	AT1G09760	promoter	3161192	3162692	0	0	0	0	0	0	0	0	0	0	0	0	0	0	0	0	0	0	0	0	0	0	0	0	0	0	0	0	0	0	0	0	0	0	0	0	0	0
1.3188303.G_A.clim-gs10	1	3188303	G	A	0.0518962	INTRON	clim-gs10	AT1G09815	promoter	3188300	3189800	0	0	0	0	0	0	0	0	0	0	0	0	0	0	0	0	0	0	0	0	0	0	0	0	0	0	0	0	0	0	0	0	0	0	0	0	0	0
1.3184669.G_A.clim-gs10	1	3184669	G	A	0.0518962	INTERGENIC	clim-gs10	AT1G09810	promoter	3183724	3185224	0	0	0	0	0	0	0	0	0	0	0	0	0	0	0	0	0	0	0	0	0	0	0	0	0	0	0	0	0	0	0	0	0	0	0	0	0	0
1.16477374.G_A.clim-gs10	1	16477374	G	A	0.0558882	INTERGENIC	clim-gs10	AT1G43690	promoter	16477158	16478658	0	0	0	0	0	0	0	0	0	0	0	0	0	0	0	0	0	0	0	0	0	0	0	0	0	0	0	0	0	0	0	0	0	0	0	0	0	0
1.2475131.T_C.clim-gs10	1	2475131	T	C	0.0558882	INTERGENIC	clim-gs10	AT1G07980	promoter	2474628	2476128	0	0	0	0	0	0	0	0	0	0	0	0	0	0	0	0	0	0	0	0	0	0	0	0	0	0	0	0	0	0	0	0	0	0	0	0	0	0
1.2475217.G_C.clim-gs10	1	2475217	G	C	0.0558882	INTERGENIC	clim-gs10	AT1G07980	promoter	2474628	2476128	0	0	0	0	0	0	0	0	0	0	0	0	0	0	0	0	0	0	0	0	0	0	0	0	0	0	0	0	0	0	0	0	0	0	0	0	0	0
1.1027842.A_C.clim-bio9	1	1027842	A	C	0.012	INTERGENIC	clim-bio9	AT1G03990	terminator	1027116	1028616	0	0	0	0	0	0	0	0	0	0	0	0	0	0	0	0	0	0	0	0	0	0	0	0	0	0	0	0	0	0	0	0	0	0	0	0	0	0
1.27380430.A_G.clim-gs10	1	27380430	A	G	0.0499002	UTR_3_PRIME	clim-gs10	AT1G72740	terminator	27379259	27380759	0	0	0	0	0	0	0	0	0	0	0	0	0	0	0	0	0	0	0	0	0	0	0	0	0	0	0	0	0	0	0	0	0	0	0	0	0	0
1.16474354.G_A.clim-gs10	1	16474354	G	A	0.0558882	INTERGENIC	clim-gs10	AT1G07193	promoter	16473042	16474542	0	0	0	0	0	0	0	0	0	0	0	0	0	0	0	0	0	0	0	0	0	0	0	0	0	0	0	0	0	0	0	0	0	0	0	0	0	0
1.9500407.T_C.clim-bio9	1	9500407	T	C	0.014	INTERGENIC	clim-bio9	AT1G27360	promoter	9499891	9501391	0	0	0	0	0	0	0	0	0	0	0	0	0	0	0	0	0	0	0	0	0	0	0	0	0	0	0	0	0	0	0	0	0	0	0	0	0	0
1.17421936.G_A.clim-gs10	1	17421936	G	A	0.0499002	INTERGENIC	clim-gs10	AT1G47485	promoter	17421431	17422931	0	0	0	0	0	0	0	0	0	0	0	0	0	0	0	0	0	0	0	0	0	0	0	0	0	0	0	0	0	0	0	0	0	0	0	0	0	0
1.27568442.A_C.clim-gs10	1	27568442	A	C	0.0658683	INTERGENIC	clim-gs10	AT1G73325	promoter	27567781	27569281	0	0	0	0	0	0	0	0	0	0	0	0	0	0	0	0	0	0	0	0	0	0	0	0	0	0	0	0	0	0	0	0	0	0	0	0	0	0
1.16474592.T_C.clim-gs10	1	16474592	T	C	0.0558882	INTERGENIC	clim-gs10	AT1G07193	terminator	16473813	16475313	0	0	0	0	0	0	0	0	0	0	0	0	0	0	0	0	0	0	0	0	0	0	0	0	0	0	0	0	0	0	0	0	0	0	0	0	0	0
1.16674707.C_T.clim-gs10	1	16674707	C	T	0.0638723	INTERGENIC	clim-gs10	AT1G43950	promoter	16673452	16674952	0	0	0	0	0	0	0	0	0	0	0	0	0	0	0	0	0	0	0	0	0	0	0	0	0	0	0	0	0	0	0	0	0	0	0	0	0	0
1.7394526.A_T.clim-gs10	1	7394526	A	T	0.0638723	INTERGENIC	clim-gs10	AT1G21120	terminator	7394178	7395678	0	0	0	0	0	0	0	0	0	0	0	0	0	0	0	0	0	0	0	0	0	0	0	0	0	0	0	0	0	0	0	0	0	0	0	0	0	0
1.16609319.A_G.clim-gs10	1	16609319	A	G	0.0618762	.	clim-gs10	AT1G43825	promoter	16608318	16609818	0	0	0	0	0	0	0	0	0	0	0	0	0	0	0	0	0	0	0	0	0	0	0	0	0	0	0	0	0	0	0	0	0	0	0	0	0	0
1.16581626.C_T.clim-gs10	1	16581626	C	T	0.0618762	INTERGENIC	clim-gs10	AT1G43815	promoter	16581083	16582583	0	0	0	0	0	0	0	0	0	0	0	0	0	0	0	0	0	0	0	0	0	0	0	0	0	0	0	0	0	0	0	0	0	0	0	0	0	0
1.16581677.G_T.clim-gs10	1	16581677	G	T	0.0618762	INTERGENIC	clim-gs10	AT1G43815	promoter	16581083	16582583	0	0	0	0	0	0	0	0	0	0	0	0	0	0	0	0	0	0	0	0	0	0	0	0	0	0	0	0	0	0	0	0	0	0	0	0	0	0
1.16609015.C_T.clim-gs10	1	16609015	C	T	0.0618762	.	clim-gs10	AT1G43825	promoter	16608318	16609818	0	0	0	0	0	0	0	0	0	0	0	0	0	0	0	0	0	0	0	0	0	0	0	0	0	0	0	0	0	0	0	0	0	0	0	0	0	0
1.16609112.G_A.clim-gs10	1	16609112	G	A	0.0618762	.	clim-gs10	AT1G43825	promoter	16608318	16609818	0	0	0	0	0	0	0	0	0	0	0	0	0	0	0	0	0	0	0	0	0	0	0	0	0	0	0	0	0	0	0	0	0	0	0	0	0	0
1.5309743.A_G.clim-bio4	1	5309743	A	G	0.0538922	INTERGENIC	clim-bio4	AT1G15440	promoter	5309058	5310558	0	0	0	0	0	0	0	0	0	0	0	0	0	0	0	0	0	0	0	0	0	0	0	0	0	0	0	0	0	0	0	0	0	0	0	0	0	0
1.4147934.A_G.avrPphB	1	4147934	A	G	0.388889	INTERGENIC	avrPphB	AT1G12230	promoter	4146961	4148461	0	0	0	0	0	0	0	0	0	0	0	0	0	0	0	0	0	0	0	0	0	0	0	0	0	0	0	0	0	0	0	0	0	0	0	0	0	0
1.4140988.A_T.avrPphB	1	4140988	A	T	0.411111	NON_SYNONYMOUS_CODING	avrPphB	AT1G12200	terminator	4139658	4141158	0	0	0	0	0	0	0	0	0	0	0	0	0	0	0	0	0	0	0	0	0	0	0	0	0	0	0	0	0	0	0	0	0	0	0	0	0	0
1.1030878.T_G.clim-bio9	1	1030878	T	G	0.012	INTERGENIC	clim-bio9	AT1G04010	terminator	1029956	1031456	0	0	0	0	0	1	0	0	0	0	0	0	0	0	0	0	0	0	0	0	0	0	0	0	0	0	0	0	0	0	0	-1	0	0	0	0	0	0
1.924146.T_A.clim-bio9	1	924146	T	A	0.012	STOP_GAINED	clim-bio9	AT1G03720	terminator	923895	925395	0	0	0	0	0	0	0	0	0	0	0	0	0	0	0	0	0	0	0	0	0	0	0	0	0	0	0	0	0	0	0	0	0	0	0	0	0	0
1.955773.G_A.clim-bio9	1	955773	G	A	0.012	UTR_3_PRIME	clim-bio9	AT1G03790	terminator	955644	957144	0	0	0	0	0	0	0	0	0	0	0	0	0	0	0	0	0	0	0	0	0	0	0	0	0	0	0	0	0	0	0	0	0	0	0	0	0	0
1.923569.C_T.clim-bio9	1	923569	C	T	0.012	SYNONYMOUS_CODING	clim-bio9	AT1G03710	promoter	922389	923889	0	0	0	0	0	0	0	0	0	0	-1	0	0	0	0	0	0	0	0	0	0	0	0	0	0	0	0	0	0	0	0	0	0	0	0	0	0	0
1.924939.G_T.clim-bio9	1	924939	G	T	0.012	INTERGENIC	clim-bio9	AT1G03720	terminator	923895	925395	0	0	0	0	0	0	0	0	0	0	0	-1	0	0	0	0	0	0	0	0	0	0	0	0	0	0	0	1	0	0	0	0	0	0	0	0	0	0
1.967311.T_C.clim-bio9	1	967311	T	C	0.012	INTERGENIC	clim-bio9	AT1G03830	promoter	966290	967790	0	0	0	0	0	0	0	0	0	0	1	0	0	0	0	0	0	0	0	0	0	0	0	0	0	0	0	0	0	0	0	0	0	0	0	0	0	0
1.900028.A_C.clim-bio9	1	900028	A	C	0.012	INTERGENIC	clim-bio9	AT1G03600	terminator	899294	900794	0	0	0	0	0	0	0	0	0	0	0	0	0	0	0	0	0	0	0	0	0	0	0	0	0	0	0	0	0	0	0	0	0	0	0	0	0	0
1.1537962.A_G.clim-tmax1	1	1537962	A	G	0.0139721	INTERGENIC	clim-tmax1	AT1G05280	promoter	1537102	1538602	0	0	0	0	0	0	0	0	0	0	0	0	0	0	0	0	0	0	0	0	0	0	0	0	0	0	0	0	0	0	0	0	0	0	0	0	0	0
1.1542562.G_T.clim-tmax1	1	1542562	G	T	0.0139721	INTERGENIC	clim-tmax1	AT1G05291	promoter	1541932	1543432	0	0	0	0	0	0	0	0	0	0	0	0	0	0	0	0	0	0	0	0	0	0	0	0	0	0	0	0	0	0	0	0	0	0	0	0	0	0
1.1543482.A_T.clim-tmax1	1	1543482	A	T	0.0139721	INTERGENIC	clim-tmax1	AT1G04377	promoter	1542787	1544287	0	0	0	0	0	0	0	0	0	0	0	0	0	0	0	0	0	0	0	0	0	0	0	0	0	0	0	-1	0	0	0	0	0	1	0	0	0	0
1.1542234.G_T.clim-tmax1	1	1542234	G	T	0.0139721	SYNONYMOUS_CODING	clim-tmax1	AT1G05291	promoter	1541932	1543432	0	0	0	0	0	0	0	0	0	0	0	0	0	0	0	0	0	0	0	0	0	0	0	0	0	0	0	0	0	0	0	0	0	0	0	0	0	0
1.27603371.G_T.clim-gs10	1	27603371	G	T	0.0678643	INTERGENIC	clim-gs10	AT1G73430	promoter	27602654	27604154	0	0	0	0	0	0	0	0	0	0	0	0	0	0	1	0	0	0	0	0	0	0	0	0	0	0	0	1	0	0	0	0	0	0	0	0	0	0
1.24729212.C_T.clim-gs10	1	24729212	C	T	0.0359281	INTERGENIC	clim-gs10	AT1G66320	promoter	24728137	24729637	0	0	0	0	0	0	0	0	0	0	0	0	0	0	0	0	0	0	0	0	0	0	0	0	0	0	0	0	0	0	0	0	0	0	0	0	0	0
1.4954098.G_A.clim-gs10	1	4954098	G	A	0.0259481	NON_SYNONYMOUS_CODING	clim-gs10	AT1G14460	promoter	4952784	4954284	0	0	0	0	0	0	0	0	0	0	0	0	0	0	0	0	0	0	0	0	0	0	0	0	0	0	0	0	0	0	0	0	0	0	0	0	0	0
1.4953380.G_C.clim-gs10	1	4953380	G	C	0.0259481	INTERGENIC	clim-gs10	AT1G14460	promoter	4952784	4954284	0	0	0	0	0	0	0	0	0	0	0	0	0	0	0	0	0	0	0	0	0	0	0	0	0	0	0	0	0	0	0	0	0	0	0	0	0	0
1.4959107.A_G.clim-gs10	1	4959107	A	G	0.0259481	SYNONYMOUS_CODING	clim-gs10	AT1G14490	promoter	4959029	4960529	0	-1	0	0	0	0	0	0	0	0	0	0	0	0	0	0	0	0	0	0	0	0	0	0	0	0	0	-1	0	0	0	0	0	0	0	0	0	0
1.16547800.C_T.clim-gs10	1	16547800	C	T	0.0578842	INTERGENIC	clim-gs10	AT1G43770	promoter	16547416	16548916	0	0	0	0	0	0	0	0	0	0	0	0	0	0	0	0	0	0	0	0	0	0	0	0	0	0	0	0	0	0	0	0	0	0	0	0	0	0
1.5273025.C_G.clim-bio4	1	5273025	C	G	0.0558882	SYNONYMOUS_CODING	clim-bio4	AT1G15310	promoter	5271558	5273058	0	0	0	0	0	0	0	0	0	0	0	0	0	0	0	0	0	0	0	0	0	0	0	0	0	0	0	0	0	0	0	0	0	0	0	0	0	0
1.5272653.T_G.clim-bio4	1	5272653	T	G	0.0558882	INTRON	clim-bio4	AT1G15310	promoter	5271558	5273058	0	0	0	0	0	0	0	0	0	0	0	0	0	0	0	0	0	0	0	0	0	0	0	0	0	0	0	0	0	0	0	0	0	0	0	0	0	0
1.5226026.C_A.clim-bio4	1	5226026	C	A	0.0558882	INTRON	clim-bio4	AT1G15190	promoter	5225981	5227481	0	0	0	0	0	0	0	0	0	0	0	0	0	0	0	0	0	0	0	0	0	0	0	0	0	0	0	0	0	0	0	0	0	0	0	0	0	0
1.16548610.T_A.clim-gs10	1	16548610	T	A	0.0578842	INTRON	clim-gs10	AT1G43770	promoter	16547416	16548916	0	0	0	0	0	0	0	0	0	0	0	0	0	0	0	0	0	0	0	0	0	0	0	0	0	0	0	0	0	0	0	0	0	0	0	0	0	0
1.16552481.T_A.clim-gs10	1	16552481	T	A	0.0578842	.	clim-gs10	AT1G43770	terminator	16551409	16552909	0	0	0	0	0	0	0	0	0	0	0	0	0	0	0	0	0	0	0	0	0	0	0	0	0	0	0	0	0	0	0	0	0	0	0	0	0	0
1.16497856.C_T.clim-gs10	1	16497856	C	T	0.0578842	INTERGENIC	clim-gs10	AT1G43722	terminator	16496877	16498377	0	0	0	0	0	0	0	0	0	0	0	0	0	0	0	0	0	0	0	0	0	0	0	0	0	0	0	0	0	0	0	0	0	0	0	0	0	0
1.20068838.A_T.YEL	1	20068838	A	T	0.0842105	INTERGENIC	YEL	AT1G53750	promoter	20068000	20069500	0	0	0	0	0	0	0	0	0	0	0	0	0	0	0	0	0	0	0	0	0	0	0	0	0	0	0	0	0	0	0	0	0	0	0	0	0	0
1.16478034.C_T.clim-gs10	1	16478034	C	T	0.0598802	INTERGENIC	clim-gs10	AT1G43690	promoter	16477158	16478658	0	0	0	0	0	0	0	0	0	0	0	0	0	0	0	0	0	0	0	0	0	0	0	0	0	0	0	0	0	0	0	0	0	0	0	0	0	0
1.16547505.G_A.clim-gs10	1	16547505	G	A	0.0578842	INTERGENIC	clim-gs10	AT1G43770	promoter	16547416	16548916	0	0	0	0	0	0	0	0	0	0	0	0	0	0	0	0	0	0	0	0	0	0	0	-1	0	0	0	0	0	0	0	0	0	0	0	0	0	0
1.27759736.G_A.clim-gs10	1	27759736	G	A	0.0598802	INTERGENIC	clim-gs10	AT1G73830	promoter	27758940	27760440	0	0	0	0	0	0	0	0	0	0	0	0	0	0	0	0	0	0	0	0	0	0	0	0	0	0	0	0	0	0	0	0	0	0	0	0	0	0
1.5217510.G_T.clim-bio4	1	5217510	G	T	0.0578842	STOP_GAINED	clim-bio4	AT1G15160	terminator	5217045	5218545	0	0	0	0	0	0	0	0	0	0	0	0	0	0	0	0	0	0	0	0	0	0	0	0	0	0	0	0	0	0	0	0	0	0	0	0	0	0
1.4148470.A_G.avrPphB	1	4148470	A	G	0.388889	INTRON	avrPphB	AT1G12220	terminator	4147439	4148939	0	0	0	0	0	0	0	0	0	0	0	0	0	0	0	0	0	0	0	0	0	0	0	0	0	0	0	0	0	0	0	0	0	0	0	0	0	0
1.3180099.C_T.clim-gs10	1	3180099	C	T	0.0538922	NON_SYNONYMOUS_CODING	clim-gs10	AT1G09810	terminator	3179925	3181425	0	0	0	0	0	0	0	0	0	0	0	0	0	0	0	0	0	0	0	0	0	0	0	0	0	0	0	0	0	0	0	0	0	0	0	0	0	0
1.29541569.C_A.clim-bio4	1	29541569	C	A	0.0419162	NON_SYNONYMOUS_CODING	clim-bio4	AT1G78530	promoter	29540365	29541865	0	0	0	0	0	0	0	0	0	0	0	0	0	0	0	0	0	0	0	0	0	0	0	0	0	0	0	0	0	0	0	0	0	0	0	0	0	0
1.20323042.G_A.YEL	1	20323042	G	A	0.0842105	UTR_5_PRIME	YEL	AT1G54440	promoter	20321963	20323463	0	0	0	0	0	0	0	0	0	0	0	0	0	0	0	0	0	0	0	0	0	0	0	0	0	0	0	0	0	0	0	0	0	0	0	0	0	0
1.20332514.C_A.YEL	1	20332514	C	A	0.0842105	INTRON	YEL	AT1G54445	promoter	20331148	20332648	0	0	0	0	0	0	0	0	0	0	0	0	0	0	0	0	0	0	0	0	0	0	0	0	0	0	0	0	0	0	0	0	0	0	0	0	0	0
1.20331520.C_T.YEL	1	20331520	C	T	0.0842105	INTERGENIC	YEL	AT1G54445	promoter	20331148	20332648	0	0	0	0	0	0	0	0	0	0	0	0	0	0	0	0	0	0	0	0	0	0	0	0	0	0	0	0	0	0	0	0	0	0	0	0	0	0
1.3174109.G_A.clim-gs10	1	3174109	G	A	0.0538922	INTRON	clim-gs10	AT1G09794	terminator	3173010	3174510	0	0	0	0	0	0	0	0	0	0	0	0	0	0	0	0	0	0	0	0	0	0	0	0	0	0	0	0	0	0	0	0	0	0	0	0	0	0
1.20219338.C_T.YEL	1	20219338	C	T	0.0842105	UTR_5_PRIME	YEL	AT1G54160	promoter	20218952	20220452	0	0	0	0	0	0	0	0	0	0	0	0	0	0	0	0	0	0	0	0	0	0	0	0	0	0	0	0	0	0	0	0	0	0	0	0	0	0
1.20219257.T_C.YEL	1	20219257	T	C	0.0842105	UTR_5_PRIME	YEL	AT1G54160	promoter	20218952	20220452	0	0	0	0	0	0	0	0	0	0	-1	0	0	0	0	0	0	0	0	0	0	1	0	0	0	0	0	0	0	0	0	0	0	0	0	0	0	0
1.9342136.T_C.clim-gs10	1	9342136	T	C	0.0359281	INTERGENIC	clim-gs10	AT1G26940	promoter	9342111	9343611	0	0	0	0	0	0	0	0	0	0	0	0	0	0	0	0	0	0	0	0	0	0	0	0	0	0	0	0	0	0	0	0	0	0	0	0	0	0
1.9346094.A_G.clim-gs10	1	9346094	A	G	0.0359281	INTERGENIC	clim-gs10	AT1G26940	terminator	9344823	9346323	0	0	0	0	0	0	0	0	0	0	0	0	0	0	0	0	0	0	0	0	0	0	0	0	0	0	0	0	0	0	0	0	0	0	0	0	0	0
1.9358054.C_T.clim-gs10	1	9358054	C	T	0.0359281	INTERGENIC	clim-gs10	AT1G26960	terminator	9357002	9358502	0	0	0	0	0	0	0	0	0	0	0	0	0	0	0	0	0	0	0	0	0	0	0	0	0	0	0	0	0	0	0	0	0	0	0	0	0	0
1.9345084.G_T.clim-gs10	1	9345084	G	T	0.0359281	UTR_3_PRIME	clim-gs10	AT1G26940	terminator	9344823	9346323	0	0	0	0	0	0	0	0	0	0	0	0	0	0	0	0	0	0	0	0	0	0	0	0	0	0	0	0	0	0	0	0	0	0	0	0	0	0
1.9350409.C_T.clim-gs10	1	9350409	C	T	0.0359281	INTERGENIC	clim-gs10	AT1G26945	promoter	9350159	9351659	0	0	0	0	0	0	0	0	0	0	0	0	0	0	0	0	0	0	0	0	0	0	0	0	0	0	0	0	0	0	0	0	0	0	0	0	0	0
1.9357867.C_T.clim-gs10	1	9357867	C	T	0.0359281	INTERGENIC	clim-gs10	AT1G26960	terminator	9357002	9358502	0	0	0	0	0	0	0	0	0	0	0	0	0	0	0	0	0	0	0	0	0	0	0	0	0	0	0	0	0	0	0	0	0	0	0	0	0	0
1.9359476.A_G.clim-gs10	1	9359476	A	G	0.0359281	INTERGENIC	clim-gs10	AT1G26970	promoter	9358324	9359824	0	0	0	0	0	0	0	0	0	0	0	0	0	0	0	0	0	0	0	0	0	0	0	0	0	0	0	0	0	0	0	0	0	0	0	0	0	0
1.3127643.T_G.clim-gs10	1	3127643	T	G	0.0538922	INTERGENIC	clim-gs10	AT1G09660	terminator	3126761	3128261	0	0	0	0	0	0	0	0	0	0	0	0	0	0	0	0	0	0	0	0	0	0	0	0	0	0	0	0	0	0	0	0	0	0	0	0	0	0
1.20237057.G_A.YEL	1	20237057	G	A	0.0842105	UTR_3_PRIME	YEL	AT1G54200	terminator	20236858	20238358	0	0	0	0	0	0	0	0	0	0	0	0	0	0	0	0	0	0	0	0	0	0	0	0	0	0	0	0	0	0	0	0	0	0	0	0	0	0
1.27669181.G_A.clim-bio6	1	27669181	G	A	0.0643863	UTR_5_PRIME	clim-bio6	AT1G73600	promoter	27668151	27669651	0	0	0	0	0	0	0	0	0	0	0	0	0	0	0	0	0	0	0	0	0	0	0	0	0	0	0	0	0	0	0	0	0	0	0	0	0	0
1.2879264.T_G.clim-gs10	1	2879264	T	G	0.0299401	INTERGENIC	clim-gs10	AT1G08960	promoter	2878505	2880005	0	0	0	0	0	0	0	0	0	0	0	0	0	0	0	0	0	0	0	0	0	0	0	0	0	0	0	0	0	0	0	0	0	0	0	0	0	0
1.2882139.T_A.clim-gs10	1	2882139	T	A	0.0299401	UTR_3_PRIME	clim-gs10	AT1G08960	terminator	2881734	2883234	0	0	0	0	0	0	0	0	0	0	0	0	0	0	0	0	0	0	0	0	0	0	0	0	0	0	0	0	0	0	0	0	0	0	0	0	0	0
1.16477787.C_T.clim-gs10	1	16477787	C	T	0.0618762	INTERGENIC	clim-gs10	AT1G43690	promoter	16477158	16478658	0	0	0	0	0	0	0	0	0	0	0	0	0	0	0	0	0	0	0	0	0	0	0	0	0	0	0	0	0	0	0	0	0	0	0	0	0	0
1.16483237.G_A.clim-gs10	1	16483237	G	A	0.0578842	INTERGENIC	clim-gs10	AT1G43690	terminator	16482359	16483859	0	0	0	0	0	0	0	0	0	0	0	0	0	0	0	0	0	0	0	0	0	0	0	0	0	0	0	0	0	0	0	0	0	0	0	0	0	0
1.27685218.G_A.clim-gs10	1	27685218	G	A	0.0658683	SYNONYMOUS_CODING	clim-gs10	AT1G73630	terminator	27685114	27686614	0	0	0	0	0	0	0	0	0	-1	0	0	0	0	0	0	0	0	0	0	0	0	0	0	0	0	0	0	0	0	0	0	0	0	0	0	0	0
1.7394909.C_A.clim-gs10	1	7394909	C	A	0.0658683	INTERGENIC	clim-gs10	AT1G21120	terminator	7394178	7395678	0	0	0	0	0	0	0	0	0	0	0	0	0	0	0	0	0	0	0	0	0	0	0	0	0	0	0	0	0	0	0	0	0	0	0	0	0	0
1.8705855.G_A.clim-gs10	1	8705855	G	A	0.0239521	INTERGENIC	clim-gs10	AT1G24570	promoter	8705799	8707299	0	0	0	0	0	0	0	0	0	0	0	0	0	0	0	0	0	0	0	0	0	0	0	0	0	0	0	0	0	0	0	0	0	0	0	0	0	0
1.17466151.A_G.clim-gs10	1	17466151	A	G	0.0479042	INTERGENIC	clim-gs10	AT1G47560	promoter	17465534	17467034	0	0	0	0	0	0	0	0	0	0	0	0	0	0	0	0	0	0	0	0	0	0	0	0	0	0	0	0	0	0	0	0	0	0	0	0	0	0
1.20278000.A_C.YEL	1	20278000	A	C	0.0842105	INTERGENIC	YEL	AT1G54320	promoter	20277481	20278981	0	0	0	0	0	0	0	0	0	0	0	0	0	0	0	0	0	0	0	0	0	0	0	0	0	0	0	0	0	0	0	0	0	0	0	0	0	0
1.20290181.A_G.YEL	1	20290181	A	G	0.0842105	NON_SYNONYMOUS_CODING	YEL	AT1G54350	terminator	20289901	20291401	0	0	0	0	0	0	0	0	0	0	0	0	0	0	0	0	0	0	-1	0	0	0	0	0	0	0	0	0	0	0	0	0	0	0	0	0	1	0
1.20244356.G_A.YEL	1	20244356	G	A	0.0842105	NON_SYNONYMOUS_CODING	YEL	AT1G54217	terminator	20242882	20244382	0	0	0	0	0	0	0	0	0	0	0	0	0	0	0	0	0	0	0	0	0	0	0	0	0	0	0	0	0	0	0	0	0	0	0	0	0	0
1.20252324.A_G.YEL	1	20252324	A	G	0.0842105	UTR_3_PRIME	YEL	AT1G54230	terminator	20251865	20253365	0	0	0	0	0	0	0	0	0	0	0	0	0	0	0	0	0	0	0	0	0	0	0	0	0	0	0	0	0	0	0	0	0	0	0	0	0	0
1.20243418.C_A.YEL	1	20243418	C	A	0.0842105	NON_SYNONYMOUS_CODING	YEL	AT1G54217	terminator	20242882	20244382	0	0	0	0	0	0	0	0	0	0	0	0	0	0	0	0	0	0	0	0	0	0	0	0	0	0	0	0	0	0	0	0	0	0	0	0	0	0
1.20246337.C_T.YEL	1	20246337	C	T	0.0842105	INTRON	YEL	AT1G54217	promoter	20245055	20246555	0	0	0	0	0	0	0	0	0	0	0	0	0	0	0	0	0	0	0	0	0	0	0	0	0	0	0	0	-1	0	0	0	0	0	0	0	0	0
1.20252332.A_C.YEL	1	20252332	A	C	0.0842105	UTR_3_PRIME	YEL	AT1G54230	terminator	20251865	20253365	0	0	0	0	0	0	0	0	0	0	0	0	0	0	0	0	0	0	0	0	0	0	0	0	0	0	0	0	0	0	0	0	0	0	0	0	0	0
1.20253111.G_A.YEL	1	20253111	G	A	0.0842105	SYNONYMOUS_CODING	YEL	AT1G54230	terminator	20251865	20253365	0	0	0	0	0	0	0	0	0	0	0	0	0	0	0	0	0	0	0	0	0	0	0	0	0	0	0	0	0	0	0	0	0	0	0	0	0	0
1.20256699.C_T.YEL	1	20256699	C	T	0.0842105	INTERGENIC	YEL	AT1G54250	terminator	20256188	20257688	0	0	0	0	0	0	0	0	0	0	0	0	0	0	0	0	0	0	0	0	0	0	0	0	0	0	0	0	0	0	0	0	0	0	0	0	0	0
1.20297484.T_C.YEL	1	20297484	T	C	0.0842105	INTERGENIC	YEL	AT1G54370	promoter	20296736	20298236	0	0	0	0	0	0	0	0	0	0	0	0	0	0	0	0	0	0	0	0	0	0	0	0	0	0	0	0	0	0	0	0	0	0	0	0	0	0
1.20297972.T_A.YEL	1	20297972	T	A	0.0842105	UTR_3_PRIME	YEL	AT1G54370	promoter	20296736	20298236	0	0	0	0	0	0	0	0	0	1	0	0	0	0	0	0	0	0	0	0	0	0	0	0	0	0	0	0	0	0	0	0	0	0	0	0	0	0
1.20270128.C_G.YEL	1	20270128	C	G	0.0842105	INTERGENIC	YEL	AT1G54300	promoter	20269809	20271309	0	0	0	0	0	0	0	0	0	0	0	0	0	0	0	0	0	0	0	0	0	0	0	0	0	0	0	0	0	0	0	0	0	0	0	0	0	0
1.20275309.G_A.YEL	1	20275309	G	A	0.0842105	NON_SYNONYMOUS_CODING	YEL	AT1G54310	terminator	20275074	20276574	0	0	0	0	0	0	0	0	0	0	0	0	0	0	0	0	0	0	0	0	0	0	0	0	0	0	0	0	0	0	0	0	0	0	0	0	0	0
1.11155929.G_A.clim-gs5	1	11155929	G	A	0.0139721	INTERGENIC	clim-gs5	AT1G31220	promoter	11155697	11157197	0	0	0	0	0	0	0	0	0	0	0	0	0	0	0	0	0	0	0	0	0	0	0	0	0	0	0	0	0	0	0	0	0	0	0	0	0	0
1.3191815.C_A.clim-bio4	1	3191815	C	A	0.0598802	NON_SYNONYMOUS_CODING	clim-bio4	AT1G09830	terminator	3191567	3193067	0	0	0	0	0	0	0	0	0	0	0	0	0	0	0	0	0	0	0	0	0	0	0	0	0	0	0	0	0	0	0	0	0	0	0	0	0	0
1.16567145.C_T.clim-gs10	1	16567145	C	T	0.0878244	INTRON	clim-gs10	AT1G43780	terminator	16566899	16568399	0	0	0	0	0	0	0	0	0	0	0	0	0	0	0	0	0	0	0	0	0	0	0	0	0	0	0	0	0	0	0	0	0	0	0	0	0	0
1.9150462.T_G.GR21 cold	1	9150462	T	G	0.0869565	INTERGENIC	GR21 cold	AT1G26450	promoter	9149750	9151250	0	0	0	0	0	0	0	0	0	0	0	0	0	0	0	0	0	0	0	0	0	0	0	0	0	0	0	0	0	0	0	0	0	0	0	0	0	0
1.9146777.A_T.GR21 cold	1	9146777	A	T	0.0869565	INTERGENIC	GR21 cold	AT1G26440	promoter	9145606	9147106	0	0	0	0	0	0	0	0	0	0	0	0	0	0	1	0	0	0	0	0	0	0	0	0	0	0	0	0	0	0	0	0	0	0	0	0	0	0
1.9148364.T_C.GR21 cold	1	9148364	T	C	0.0869565	INTERGENIC	GR21 cold	AT1G26450	terminator	9147635	9149135	0	0	0	0	0	0	0	0	0	0	0	0	0	0	0	0	0	0	0	0	0	0	0	0	0	0	0	0	1	0	0	0	0	0	0	0	0	0
1.9160637.A_G.GR21 cold	1	9160637	A	G	0.0869565	SYNONYMOUS_CODING	GR21 cold	AT1G26500	terminator	9159397	9160897	0	0	0	0	0	0	0	0	0	0	0	0	0	0	0	0	0	0	0	0	0	0	0	0	0	0	0	0	0	0	0	0	0	0	0	0	0	0
1.24704078.A_G.clim-gs10	1	24704078	A	G	0.0399202	INTERGENIC	clim-gs10	AT1G66270	promoter	24702666	24704166	0	0	0	0	0	0	0	0	0	0	0	0	0	0	0	0	0	0	0	0	0	0	0	0	0	0	0	0	0	0	0	0	0	0	0	0	0	0
1.17556314.G_A.clim-gs10	1	17556314	G	A	0.0479042	INTERGENIC	clim-gs10	AT1G47710	promoter	17556090	17557590	0	0	0	0	0	0	0	0	0	0	0	0	0	0	0	0	0	0	0	0	0	0	0	0	0	0	0	0	0	0	0	0	0	0	0	0	0	0
1.2465261.A_T.clim-gs10	1	2465261	A	T	0.0578842	INTRON	clim-gs10	AT1G07950	terminator	2464728	2466228	0	0	0	0	0	0	0	0	0	0	0	0	0	0	0	0	0	0	0	0	0	0	0	0	0	0	0	0	0	0	0	0	0	0	0	0	0	0
1.29703161.T_A.clim-gs10	1	29703161	T	A	0.0419162	UTR_5_PRIME	clim-gs10	AT1G78970	promoter	29702054	29703554	0	0	0	0	0	0	0	0	0	0	0	0	0	0	0	0	0	0	0	0	0	0	0	0	0	0	0	0	0	0	0	0	0	0	0	0	0	0
1.2704015.C_T.clim-gs10	1	2704015	C	T	0.0518962	INTRON	clim-gs10	AT1G08530	terminator	2702662	2704162	0	0	0	0	0	0	0	0	0	0	0	0	0	0	0	0	0	0	0	0	0	0	0	0	0	0	0	0	0	0	0	0	0	0	0	0	0	0
1.2700014.G_A.clim-gs10	1	2700014	G	A	0.0518962	INTRON	clim-gs10	AT1G08530	promoter	2699980	2701480	0	0	0	0	0	0	0	0	0	0	0	0	0	0	0	0	0	0	0	0	0	0	0	0	0	0	0	0	0	0	0	0	0	0	0	0	0	0
1.2704145.T_C.clim-gs10	1	2704145	T	C	0.0518962	SYNONYMOUS_CODING	clim-gs10	AT1G08530	terminator	2702662	2704162	0	0	0	0	0	0	0	0	0	0	0	0	0	0	0	0	0	0	0	0	0	0	0	0	0	0	0	0	0	0	0	0	0	0	0	0	0	0
1.21366065.A_C.clim-pet12	1	21366065	A	C	0.0139721	INTERGENIC	clim-pet12	AT1G57690	terminator	21365720	21367220	0	0	0	0	0	0	0	0	0	0	0	0	0	0	0	0	0	0	0	0	0	0	0	0	0	0	0	0	0	0	0	0	0	0	0	0	0	0
1.1355844.G_A.clim-bio9	1	1355844	G	A	0.012	INTERGENIC	clim-bio9	AT1G04820	terminator	1355083	1356583	0	0	0	0	0	0	0	0	0	0	0	0	0	0	0	0	0	0	0	0	0	0	0	0	0	0	0	0	0	0	0	0	0	0	0	0	0	0
1.16680581.T_A.clim-gs10	1	16680581	T	A	0.0598802	INTERGENIC	clim-gs10	AT1G43970	promoter	16680268	16681768	0	0	0	0	0	0	0	0	0	0	0	0	0	0	0	0	0	0	0	0	0	0	0	0	0	0	0	0	0	0	0	0	0	0	0	0	0	0
1.3184941.T_A.clim-gs10	1	3184941	T	A	0.0558882	INTERGENIC	clim-gs10	AT1G09810	promoter	3183724	3185224	0	0	0	0	0	0	0	0	0	0	0	0	0	0	0	0	0	0	0	0	0	0	0	0	0	0	0	0	0	0	0	0	0	0	0	0	0	0
1.16738253.G_A.clim-gs10	1	16738253	G	A	0.0459082	INTERGENIC	clim-gs10	AT1G44050	promoter	16738191	16739691	0	0	0	0	0	0	0	0	0	0	0	0	0	0	0	0	0	0	0	0	0	0	0	0	0	0	0	0	0	0	0	0	0	0	0	0	0	0
1.16739020.T_A.clim-gs10	1	16739020	T	A	0.0459082	INTERGENIC	clim-gs10	AT1G44050	promoter	16738191	16739691	0	0	0	0	0	0	0	0	0	0	0	0	0	0	0	0	0	0	0	0	0	0	0	0	0	0	0	0	0	0	0	0	0	0	0	0	0	0
1.16738350.G_A.clim-gs10	1	16738350	G	A	0.0459082	INTERGENIC	clim-gs10	AT1G44050	promoter	16738191	16739691	0	0	0	0	0	0	0	0	0	0	0	0	0	0	0	0	0	0	0	0	0	0	0	0	0	0	0	0	0	0	0	0	0	0	0	0	0	0
1.16727718.G_A.clim-gs10	1	16727718	G	A	0.0459082	INTRAGENIC	clim-gs10	AT1G44030	promoter	16726252	16727752	0	0	0	0	0	0	0	0	0	0	0	0	0	0	0	0	0	0	0	0	0	0	0	0	0	0	0	0	0	0	0	0	0	0	0	0	0	0
1.16738863.C_A.clim-gs10	1	16738863	C	A	0.0459082	INTERGENIC	clim-gs10	AT1G44050	promoter	16738191	16739691	0	0	0	0	0	0	0	0	0	0	0	0	0	0	0	0	0	0	0	0	0	0	0	0	0	0	0	0	0	0	0	0	0	0	0	0	0	0
1.1193792.A_T.clim-tmax2	1	1193792	A	T	0.0199601	UTR_3_PRIME	clim-tmax2	AT1G04420	terminator	1193384	1194884	0	0	0	0	0	0	0	0	0	0	0	0	0	0	0	0	0	0	0	0	0	0	0	0	0	0	0	0	0	0	0	0	0	0	0	0	0	0
1.1208611.A_T.clim-tmax2	1	1208611	A	T	0.0199601	INTRON	clim-tmax2	AT1G04445	terminator	1207439	1208939	0	0	0	0	0	0	0	0	0	0	0	0	0	0	0	0	0	0	0	0	0	0	0	0	0	0	0	0	0	0	0	0	0	1	0	0	0	0
1.1188991.T_A.clim-tmax2	1	1188991	T	A	0.0199601	INTERGENIC	clim-tmax2	AT1G04410	terminator	1187994	1189494	0	0	0	0	0	0	0	0	0	0	0	0	0	0	0	0	0	0	0	0	0	0	0	0	0	0	0	0	0	0	0	0	0	0	0	0	0	0
1.1258767.C_T.clim-tmax2	1	1258767	C	T	0.0199601	NON_SYNONYMOUS_CODING	clim-tmax2	AT1G04580	promoter	1257393	1258893	0	0	0	0	0	0	0	0	0	0	0	0	0	0	0	0	0	0	0	0	0	0	0	0	0	0	0	0	0	0	0	0	0	0	0	0	0	0
1.1183813.A_T.clim-tmax2	1	1183813	A	T	0.0199601	INTERGENIC	clim-tmax2	AT1G04390	promoter	1183204	1184704	0	0	0	0	0	0	0	0	0	0	0	0	0	0	0	0	0	0	0	0	0	0	0	0	0	0	0	0	0	0	0	0	0	0	0	0	0	0
1.1188672.C_T.clim-tmax2	1	1188672	C	T	0.0199601	INTERGENIC	clim-tmax2	AT1G04410	terminator	1187994	1189494	0	0	0	0	0	0	0	0	0	0	0	0	0	0	0	0	0	0	0	0	0	0	0	0	0	0	0	0	0	0	0	0	0	0	0	0	0	0
1.1189381.T_C.clim-tmax2	1	1189381	T	C	0.0199601	UTR_3_PRIME	clim-tmax2	AT1G04410	terminator	1187994	1189494	0	0	0	0	0	0	0	0	0	0	0	0	0	0	0	0	0	0	0	0	0	0	0	0	0	0	0	0	0	0	0	0	0	0	0	0	0	0
1.1287315.A_G.clim-tmax2	1	1287315	A	G	0.0199601	INTERGENIC	clim-tmax2	AT1G04625	terminator	1286830	1288330	0	0	0	0	0	0	0	0	0	0	0	0	0	0	0	0	0	0	0	0	0	0	0	0	0	0	0	0	0	0	0	0	0	0	0	0	0	0
1.1290334.A_G.clim-tmax2	1	1290334	A	G	0.0199601	INTRON	clim-tmax2	AT1G04625	promoter	1289320	1290820	0	0	0	0	0	0	0	0	0	0	0	0	0	0	0	0	0	0	0	0	0	0	0	0	0	0	0	0	0	0	0	0	0	0	0	0	0	0
1.1226867.C_T.clim-tmax2	1	1226867	C	T	0.0199601	NON_SYNONYMOUS_CODING	clim-tmax2	AT1G04510	promoter	1225482	1226982	0	0	0	0	0	0	0	0	0	0	0	0	0	0	0	0	0	0	0	0	0	0	0	0	0	0	0	0	0	0	0	0	0	0	0	0	0	0
1.21014710.C_T.clim-gs9	1	21014710	C	T	0.0179641	INTERGENIC	clim-gs9	AT1G56145	promoter	21013595	21015095	0	0	0	0	0	0	0	0	0	-1	0	0	0	0	0	0	0	0	0	0	0	0	0	0	0	0	0	0	0	0	0	0	0	0	0	0	0	0
1.21026556.G_A.clim-gs9	1	21026556	G	A	0.0179641	SYNONYMOUS_CODING	clim-gs9	AT1G56170	terminator	21025402	21026902	0	0	0	0	0	0	0	0	0	0	0	0	0	0	0	0	0	0	0	0	0	0	0	0	0	0	0	0	0	0	0	0	0	0	0	0	0	0
1.21026881.T_A.clim-gs9	1	21026881	T	A	0.0179641	INTRON	clim-gs9	AT1G56170	terminator	21025402	21026902	0	0	0	0	0	0	0	0	0	0	0	0	0	0	0	0	0	0	0	0	0	0	0	0	0	0	0	0	0	0	0	0	0	0	0	0	0	0
1.21028669.G_T.clim-gs9	1	21028669	G	T	0.0179641	SYNONYMOUS_CODING	clim-gs9	AT1G56180	promoter	21027566	21029066	0	0	0	0	0	0	0	0	0	0	0	0	0	0	0	0	0	0	0	0	0	0	0	0	0	0	0	0	0	0	0	0	0	0	0	0	0	0
1.21024283.C_G.clim-gs9	1	21024283	C	G	0.0179641	.	clim-gs9	AT1G56160	terminator	21023087	21024587	0	0	0	0	0	0	0	0	0	0	0	0	0	0	0	0	0	0	0	0	0	0	0	0	0	0	0	0	0	0	0	0	0	0	0	0	0	0
1.21015007.C_T.clim-gs9	1	21015007	C	T	0.0179641	INTERGENIC	clim-gs9	AT1G56145	promoter	21013595	21015095	0	0	0	0	0	0	0	0	0	0	0	0	0	0	0	0	0	0	0	0	0	0	0	0	0	0	0	0	0	0	0	0	0	0	0	0	0	0
1.21032113.G_C.clim-gs9	1	21032113	G	C	0.0179641	INTERGENIC	clim-gs9	AT1G56200	terminator	21031734	21033234	0	1	0	0	0	0	0	0	0	0	0	0	0	0	-1	0	0	0	0	0	0	0	0	0	0	0	0	0	0	0	0	0	0	0	0	0	0	0
1.27441384.A_G.clim-gs10	1	27441384	A	G	0.0518962	INTERGENIC	clim-gs10	AT1G72940	promoter	27440980	27442480	0	0	0	0	0	0	0	0	0	0	0	0	0	0	0	0	0	0	0	0	0	0	0	0	0	0	0	0	0	0	0	0	0	0	0	0	0	0
1.16580063.T_C.clim-gs10	1	16580063	T	C	0.0718563	INTERGENIC	clim-gs10	AT1G43800	terminator	16579222	16580722	0	0	0	0	0	0	0	0	0	0	0	0	0	0	0	0	0	0	0	0	0	0	0	0	0	0	0	0	0	0	0	0	0	0	0	0	0	0
1.3212025.T_A.clim-gs10	1	3212025	T	A	0.0299401	INTERGENIC	clim-gs10	AT1G04747	promoter	3211811	3213311	0	0	0	0	0	0	0	0	0	0	0	0	0	0	0	0	0	0	0	0	0	0	0	0	0	0	0	0	0	0	0	0	0	0	0	0	0	0
1.20311658.A_C.clim-gs9	1	20311658	A	C	0.0199601	INTRON	clim-gs9	AT1G54420	promoter	20310618	20312118	0	0	0	0	0	0	0	0	0	0	0	0	0	0	0	0	0	0	0	0	0	0	0	0	0	0	0	1	0	0	0	0	0	0	0	0	0	0
1.27426849.A_C.clim-gs10	1	27426849	A	C	0.0558882	INTERGENIC	clim-gs10	AT1G72880	promoter	27425715	27427215	0	0	0	0	0	0	0	0	0	0	0	0	0	0	0	0	0	0	0	0	0	0	0	0	0	0	0	0	0	0	0	0	0	0	0	0	0	0
1.16483927.T_A.clim-gs10	1	16483927	T	A	0.0598802	INTERGENIC	clim-gs10	AT1G43700	promoter	16483230	16484730	0	0	0	0	0	0	0	0	0	0	0	0	0	0	0	0	0	0	0	0	0	0	0	0	0	0	0	0	0	0	0	0	0	0	0	0	0	0
1.3255729.G_A.clim-aet5	1	3255729	G	A	0.0319361	INTERGENIC	clim-aet5	AT1G09970	terminator	3255282	3256782	0	0	0	0	0	0	0	0	0	0	0	0	0	0	0	0	0	0	0	0	0	0	0	0	0	0	0	0	0	0	0	0	0	0	0	0	0	0
1.30375938.A_G.clim-gs10	1	30375938	A	G	0.0179641	INTERGENIC	clim-gs10	AT1G80830	promoter	30375572	30377072	0	0	0	0	0	0	0	0	0	0	0	0	0	0	0	0	0	0	0	0	0	0	0	0	0	0	0	0	0	0	0	0	0	1	0	0	0	0
1.982895.C_A.clim-bio9	1	982895	C	A	0.014	SYNONYMOUS_CODING	clim-bio9	AT1G03860	promoter	981502	983002	0	0	0	0	0	0	0	0	0	0	0	0	0	0	0	0	0	0	0	0	0	0	0	0	0	0	0	0	0	0	0	0	0	0	0	0	0	0
1.24686998.G_T.clim-gs10	1	24686998	G	T	0.0159681	INTRON	clim-gs10	AT1G66240	promoter	24686917	24688417	0	0	0	0	0	0	0	0	0	0	0	0	0	0	0	0	0	0	0	0	0	0	0	0	0	0	0	0	0	0	0	0	0	0	0	0	0	0
1.24686975.A_T.clim-gs10	1	24686975	A	T	0.0159681	INTRON	clim-gs10	AT1G66240	promoter	24686917	24688417	0	0	0	0	0	0	0	0	0	0	0	0	0	0	0	0	0	0	0	0	0	0	0	0	0	0	0	0	0	0	0	0	0	0	0	0	0	0
1.24686964.T_C.clim-gs10	1	24686964	T	C	0.0159681	INTRON	clim-gs10	AT1G66240	promoter	24686917	24688417	0	0	0	0	0	0	0	0	0	0	0	0	0	0	0	0	0	0	0	0	0	0	0	0	0	0	0	0	0	0	0	0	0	0	0	0	0	0
1.16672790.G_A.clim-gs10	1	16672790	G	A	0.0678643	INTRON	clim-gs10	AT1G43950	terminator	16671581	16673081	0	0	0	0	0	0	0	0	0	0	0	0	0	0	0	0	0	0	0	0	0	0	0	0	0	0	0	0	0	0	0	0	0	0	0	0	0	0
1.27759453.C_A.clim-gs10	1	27759453	C	A	0.0618762	INTERGENIC	clim-gs10	AT1G73830	promoter	27758940	27760440	0	0	0	0	0	0	0	0	0	0	0	0	0	0	0	0	0	0	0	0	0	-1	0	0	0	0	0	0	0	0	0	0	0	0	0	0	0	0
1.4829097.T_C.clim-bio4	1	4829097	T	C	0.0439122	NON_SYNONYMOUS_CODING	clim-bio4	AT1G14100	terminator	4829087	4830587	0	0	0	0	0	0	0	0	0	0	0	0	0	0	0	0	0	0	0	0	0	0	0	0	0	0	0	0	0	0	0	0	0	0	0	0	0	0
1.3876013.C_T.clim-gs10	1	3876013	C	T	0.0259481	NON_SYNONYMOUS_CODING	clim-gs10	AT1G11530	terminator	3874984	3876484	0	0	0	0	0	0	0	0	0	0	0	0	0	0	0	0	0	0	0	0	0	0	0	0	0	0	0	0	0	0	0	0	0	0	0	0	0	0
1.1589909.A_T.clim-gs10	1	1589909	A	T	0.0259481	INTERGENIC	clim-gs10	AT1G05420	promoter	1588972	1590472	0	0	0	0	0	0	0	0	0	0	0	0	0	0	0	0	0	0	0	0	0	0	0	0	0	0	0	0	0	0	0	0	0	0	0	0	0	0
1.24720945.A_C.clim-gs10	1	24720945	A	C	0.0419162	INTERGENIC	clim-gs10	AT1G08833	promoter	24720320	24721820	0	0	0	0	0	0	0	0	0	0	0	0	0	0	0	0	0	0	0	0	0	0	0	0	0	0	0	0	0	0	0	0	0	0	0	0	0	0
1.1231323.G_A.clim-tmax2	1	1231323	G	A	0.0219561	INTERGENIC	clim-tmax2	AT1G04520	promoter	1230451	1231951	0	0	0	0	0	0	0	0	0	0	0	0	0	0	0	0	0	0	0	0	0	0	0	0	0	0	0	0	0	0	0	0	0	0	0	0	0	0
1.1234222.G_T.clim-tmax2	1	1234222	G	T	0.0219561	UTR_3_PRIME	clim-tmax2	AT1G04520	terminator	1233532	1235032	0	0	0	0	0	0	0	0	0	0	0	0	0	0	0	0	0	0	0	0	0	0	0	0	0	0	0	0	0	0	0	0	0	0	0	0	0	0
1.1239619.C_T.clim-tmax2	1	1239619	C	T	0.0219561	INTERGENIC	clim-tmax2	AT1G04550	promoter	1239293	1240793	0	0	0	0	0	0	0	0	0	0	0	0	0	0	0	0	0	0	0	0	0	0	0	0	0	0	0	0	0	0	0	0	0	0	0	0	0	0
1.1242204.A_C.clim-tmax2	1	1242204	A	C	0.0219561	INTERGENIC	clim-tmax2	AT1G04550	terminator	1241657	1243157	0	0	0	0	0	0	0	0	0	0	0	0	0	0	0	0	0	0	0	0	0	0	0	0	0	0	0	0	0	0	0	0	0	0	0	0	0	0
1.1242215.G_C.clim-tmax2	1	1242215	G	C	0.0219561	INTERGENIC	clim-tmax2	AT1G04550	terminator	1241657	1243157	0	0	0	0	0	0	0	0	0	0	0	0	0	0	0	0	0	0	0	0	0	0	0	0	0	0	0	0	0	0	0	0	0	0	0	0	0	0
1.1239576.C_T.clim-tmax2	1	1239576	C	T	0.0219561	INTERGENIC	clim-tmax2	AT1G04550	promoter	1239293	1240793	0	0	0	0	0	0	0	0	0	0	0	0	0	0	0	0	0	0	0	0	0	0	0	0	0	0	0	0	0	0	0	0	0	0	0	0	0	0
1.1239599.T_C.clim-tmax2	1	1239599	T	C	0.0219561	INTERGENIC	clim-tmax2	AT1G04550	promoter	1239293	1240793	0	0	0	0	0	0	0	0	0	0	0	0	0	0	0	0	0	0	0	0	0	0	0	0	0	0	0	0	0	0	0	0	0	0	0	0	0	0
1.1286376.A_T.clim-tmax2	1	1286376	A	T	0.0219561	INTRON	clim-tmax2	AT1G04620	promoter	1286119	1287619	0	0	0	0	0	0	0	0	0	0	0	0	0	0	0	0	0	0	0	0	0	0	0	0	0	0	0	0	0	0	0	0	0	0	0	0	0	0
1.1286377.T_G.clim-tmax2	1	1286377	T	G	0.0219561	INTRON	clim-tmax2	AT1G04620	promoter	1286119	1287619	0	0	0	0	0	0	0	0	0	0	0	0	0	0	0	0	0	0	0	0	0	0	0	0	0	0	0	0	0	0	0	0	0	0	0	0	0	0
1.1214716.A_G.clim-tmax2	1	1214716	A	G	0.0219561	INTERGENIC	clim-tmax2	AT1G04470	promoter	1214341	1215841	0	0	0	0	0	0	0	0	0	0	0	0	0	0	0	0	0	0	0	0	0	0	0	0	0	0	0	0	0	0	0	0	0	0	0	0	0	0
1.1234624.A_G.clim-tmax2	1	1234624	A	G	0.0219561	SYNONYMOUS_CODING	clim-tmax2	AT1G04520	terminator	1233532	1235032	0	0	0	0	0	0	0	0	0	0	0	0	0	0	0	0	0	0	0	0	0	0	0	0	0	0	0	0	0	0	0	0	0	0	0	0	0	0
1.1292094.T_G.clim-tmax2	1	1292094	T	G	0.0219561	UTR_5_PRIME	clim-tmax2	AT1G04640	promoter	1291022	1292522	0	0	0	0	0	0	0	0	0	0	0	0	0	0	0	0	0	0	0	0	0	0	0	0	0	0	0	0	0	0	0	0	0	0	0	0	0	0
1.1233234.A_T.clim-tmax2	1	1233234	A	T	0.0219561	INTRON	clim-tmax2	AT1G04530	terminator	1233175	1234675	0	0	0	0	0	0	0	0	0	0	0	0	0	0	0	0	0	0	0	0	0	0	0	0	0	0	0	0	0	0	0	0	0	0	0	0	0	0
1.1238852.C_T.clim-tmax2	1	1238852	C	T	0.0219561	NON_SYNONYMOUS_CODING	clim-tmax2	AT1G04540	terminator	1238699	1240199	0	0	0	0	0	0	0	0	0	0	0	0	0	0	0	0	0	0	0	0	0	0	0	0	0	0	0	1	0	0	0	0	0	0	0	0	0	0
1.1240626.G_C.clim-tmax2	1	1240626	G	C	0.0219561	SYNONYMOUS_CODING	clim-tmax2	AT1G04550	promoter	1239293	1240793	0	0	0	0	0	0	0	0	0	0	0	0	0	0	0	0	0	0	0	0	0	0	0	0	0	0	0	0	0	1	0	0	0	0	0	0	0	0
1.1205517.C_T.clim-tmax2	1	1205517	C	T	0.0219561	SYNONYMOUS_CODING	clim-tmax2	AT1G04440	terminator	1205509	1207009	0	0	0	0	0	0	0	0	0	0	0	0	0	0	0	0	0	0	0	0	0	0	0	0	0	0	0	0	0	0	0	0	0	0	0	0	0	0
1.1239468.C_T.clim-tmax2	1	1239468	C	T	0.0219561	INTERGENIC	clim-tmax2	AT1G04550	promoter	1239293	1240793	0	0	0	0	0	0	0	0	0	0	0	0	0	0	0	0	0	0	0	0	0	0	0	0	0	0	0	0	0	0	0	0	0	0	0	0	0	0
1.1242352.T_C.clim-tmax2	1	1242352	T	C	0.0299401	INTERGENIC	clim-tmax2	AT1G04550	terminator	1241657	1243157	0	0	0	0	0	0	0	0	0	0	0	0	0	0	0	0	0	0	0	0	0	0	0	0	0	0	0	0	0	0	0	0	0	-1	0	0	0	0
1.1017202.T_C.clim-bio9	1	1017202	T	C	0.016	INTRON	clim-bio9	AT1G03970	promoter	1017057	1018557	0	0	0	0	0	0	0	0	0	0	0	0	0	0	0	0	0	0	0	0	0	0	0	0	0	0	0	0	0	0	0	0	0	0	0	0	0	0
1.1017937.A_G.clim-bio9	1	1017937	A	G	0.016	INTERGENIC	clim-bio9	AT1G03960	terminator	1017457	1018957	0	0	0	0	0	0	0	0	0	0	0	0	0	0	0	0	0	0	0	0	0	0	0	0	0	0	0	0	0	0	0	0	0	0	0	0	0	0
1.25571650.T_C.clim-gs tmax	1	25571650	T	C	0.0139721	UTR_3_PRIME	clim-gs tmax	AT1G68230	promoter	25571118	25572618	0	0	0	0	0	0	0	0	0	0	0	0	0	0	0	0	0	0	0	0	0	0	0	0	0	0	0	0	0	0	0	0	0	0	0	0	0	0
1.29510581.C_T.clim-bio4	1	29510581	C	T	0.0578842	NON_SYNONYMOUS_CODING	clim-bio4	AT1G78440	terminator	29510560	29512060	0	0	0	0	0	0	0	0	0	0	0	0	0	0	0	0	0	0	0	0	0	0	0	0	0	0	0	0	0	0	0	0	0	0	0	0	0	0
1.3721758.C_G.clim-tmax2	1	3721758	C	G	0.011976	INTERGENIC	clim-tmax2	AT1G11130	promoter	3721707	3723207	0	-1	0	0	0	0	0	0	0	0	0	0	0	0	0	0	0	0	0	0	0	0	0	0	0	0	0	0	1	0	0	0	0	0	0	0	0	0
1.3727393.C_T.clim-tmax2	1	3727393	C	T	0.011976	UTR_3_PRIME	clim-tmax2	AT1G11130	terminator	3726950	3728450	0	0	0	0	0	0	0	0	0	0	0	0	0	0	0	0	0	0	0	0	0	0	0	0	0	0	0	0	-1	0	0	0	0	0	0	0	0	0
1.3704458.T_C.clim-tmax2	1	3704458	T	C	0.011976	NON_SYNONYMOUS_CODING	clim-tmax2	AT1G11090	terminator	3703279	3704779	0	0	0	0	0	0	0	0	0	0	0	0	0	0	0	0	0	0	0	0	0	0	0	0	0	0	0	0	0	0	0	0	0	0	0	0	0	0
1.3872952.C_T.clim-tmax2	1	3872952	C	T	0.011976	INTERGENIC	clim-tmax2	AT1G11520	promoter	3872028	3873528	0	0	0	0	0	0	0	0	0	0	0	0	0	0	0	0	0	0	0	0	0	0	0	0	0	0	0	0	0	0	0	0	0	0	0	0	0	0
1.3745058.T_A.clim-tmax2	1	3745058	T	A	0.011976	.	clim-tmax2	AT1G11170	terminator	3744175	3745675	0	0	0	0	0	0	0	0	0	0	0	0	0	0	0	0	0	0	0	0	0	0	0	0	0	0	0	0	0	0	0	0	0	0	0	0	0	0
1.3752334.T_G.clim-tmax2	1	3752334	T	G	0.011976	INTRON	clim-tmax2	AT1G11190	promoter	3752280	3753780	0	0	0	0	0	0	0	0	0	0	0	0	0	0	0	0	0	0	0	0	0	0	0	0	0	0	0	0	0	0	0	0	0	0	0	0	0	0
1.3843833.T_G.clim-tmax2	1	3843833	T	G	0.011976	NON_SYNONYMOUS_CODING	clim-tmax2	AT1G11420	terminator	3843460	3844960	0	0	0	0	0	0	0	0	0	0	0	0	0	0	0	0	0	0	0	0	0	0	0	0	0	0	0	0	0	0	0	0	0	0	0	0	0	0
1.3655431.C_T.clim-tmax2	1	3655431	C	T	0.011976	INTRON	clim-tmax2	AT1G10940	terminator	3654672	3656172	0	0	0	0	0	0	0	0	0	0	0	0	0	0	0	0	0	0	0	0	0	0	0	0	0	0	0	0	0	0	0	0	0	0	0	0	0	0
1.3727338.C_T.clim-tmax2	1	3727338	C	T	0.011976	UTR_3_PRIME	clim-tmax2	AT1G11130	terminator	3726950	3728450	0	0	0	0	0	0	0	0	0	0	0	0	0	0	0	0	0	0	0	0	0	1	0	0	0	0	0	0	0	0	0	0	0	0	0	0	0	0
1.29577834.G_A.clim-bio4	1	29577834	G	A	0.0658683	INTERGENIC	clim-bio4	AT1G78630	terminator	29577380	29578880	0	0	0	0	0	0	0	0	0	0	0	0	0	0	0	0	0	0	0	0	0	0	0	0	0	0	0	0	0	0	0	0	0	0	0	0	0	0
1.29551009.G_A.clim-bio4	1	29551009	G	A	0.0658683	SYNONYMOUS_CODING	clim-bio4	AT1G09823	promoter	29549685	29551185	0	0	0	0	0	0	0	0	0	0	0	0	0	0	0	0	0	0	0	0	0	0	0	0	0	0	0	0	0	0	0	0	0	0	0	0	0	0
1.1014254.T_A.clim-bio9	1	1014254	T	A	0.018	INTRON	clim-bio9	AT1G03950	promoter	1012865	1014365	0	0	0	0	0	0	0	0	0	0	0	0	0	0	0	0	0	0	0	0	0	0	0	0	0	0	0	0	0	0	0	0	0	0	0	0	0	0
1.1242218.T_A.clim-tmax2	1	1242218	T	A	0.0259481	INTERGENIC	clim-tmax2	AT1G04550	terminator	1241657	1243157	0	0	0	0	0	0	0	0	0	0	0	0	0	0	0	0	0	0	0	0	0	0	0	0	0	0	0	0	0	0	0	0	0	0	0	0	0	0
1.15650600.A_G.clim-tmin11	1	15650600	A	G	0.0678643	INTERGENIC	clim-tmin11	AT1G41880	terminator	15649634	15651134	0	0	0	0	0	0	0	0	0	0	0	0	0	0	0	0	0	0	0	0	0	0	0	0	0	0	0	0	0	0	0	0	0	0	0	0	0	0
1.12256899.T_C.clim-aet5	1	12256899	T	C	0.011976	INTRON	clim-aet5	AT1G33790	promoter	12255473	12256973	0	0	0	0	0	0	0	0	0	0	0	0	0	0	0	0	0	0	0	0	0	0	0	0	0	0	0	0	0	0	0	0	0	0	0	0	0	0
1.12217132.A_G.clim-aet5	1	12217132	A	G	0.011976	INTERGENIC	clim-aet5	AT1G06697	terminator	12216891	12218391	0	0	0	0	0	0	0	0	0	0	0	0	0	0	0	0	0	0	0	0	0	0	0	0	0	0	0	0	0	0	0	0	0	0	0	0	0	0
1.12200580.A_G.clim-aet5	1	12200580	A	G	0.011976	INTERGENIC	clim-aet5	AT1G06687	terminator	12199289	12200789	0	0	0	0	0	0	0	0	0	0	-1	0	0	0	0	0	0	0	0	0	0	0	0	0	0	0	0	0	0	0	0	0	0	0	0	0	0	0
1.12237728.T_C.clim-aet5	1	12237728	T	C	0.011976	INTERGENIC	clim-aet5	AT1G33760	promoter	12236546	12238046	0	0	0	0	0	0	0	0	0	0	0	1	0	0	0	0	0	0	0	0	0	0	0	0	0	0	0	0	0	0	0	0	0	0	0	0	0	0
1.12216993.A_G.clim-aet5	1	12216993	A	G	0.011976	INTERGENIC	clim-aet5	AT1G06697	terminator	12216891	12218391	0	0	0	0	0	0	0	0	0	0	0	0	0	0	0	0	0	0	0	0	0	0	0	0	0	0	0	0	0	0	0	0	0	0	0	0	0	0
1.12295147.T_G.clim-aet5	1	12295147	T	G	0.011976	NON_SYNONYMOUS_CODING	clim-aet5	AT1G33860	terminator	12294805	12296305	0	0	0	0	0	0	0	0	0	0	0	0	0	0	0	0	0	0	0	0	0	0	0	0	0	0	0	0	0	0	0	0	0	0	0	0	0	0
1.3189364.T_C.clim-bio4	1	3189364	T	C	0.0499002	INTERGENIC	clim-bio4	AT1G09812	terminator	3188354	3189854	0	0	0	0	0	0	0	0	0	0	0	0	0	0	0	0	0	0	0	0	0	0	0	0	0	0	0	0	0	0	0	0	0	0	0	0	0	0
1.3190376.T_A.clim-bio4	1	3190376	T	A	0.0499002	UTR_3_PRIME	clim-bio4	AT1G09815	terminator	3189742	3191242	0	0	0	0	0	0	0	0	0	0	0	0	0	0	0	0	0	0	0	0	0	0	0	0	0	0	0	0	0	0	0	0	0	0	0	0	0	0
1.26111889.A_T.SDV	1	26111889	A	T	0.0503145	UTR_3_PRIME	SDV	AT1G69460	terminator	26110687	26112187	0	0	0	0	0	0	0	0	0	0	0	0	0	0	0	0	0	0	0	0	0	0	0	0	0	0	0	0	0	0	0	0	0	0	0	0	0	0
1.1544915.A_G.clim-tmax1	1	1544915	A	G	0.0179641	INTERGENIC	clim-tmax1	AT1G05300	terminator	1543926	1545426	0	0	0	0	0	0	0	0	0	0	0	0	0	0	0	0	0	0	0	0	0	0	0	0	0	0	0	0	0	0	0	0	0	0	0	0	0	0
1.1544447.G_A.clim-tmax1	1	1544447	G	A	0.0179641	INTERGENIC	clim-tmax1	AT1G05300	terminator	1543926	1545426	0	0	0	0	0	0	0	0	0	0	0	0	0	0	0	0	0	0	0	0	0	0	0	0	0	0	0	0	0	0	0	0	0	0	0	0	0	0
1.1545169.T_A.clim-tmax1	1	1545169	T	A	0.0179641	UTR_3_PRIME	clim-tmax1	AT1G05300	terminator	1543926	1545426	0	0	0	0	0	0	0	0	0	0	0	0	0	0	0	0	0	0	0	0	0	0	0	0	0	0	0	0	0	0	0	0	0	0	0	0	0	0
1.29613299.T_G.clim-bio4	1	29613299	T	G	0.0399202	SYNONYMOUS_CODING	clim-bio4	AT1G78750	terminator	29611903	29613403	0	0	0	0	0	0	0	0	0	0	0	0	0	0	0	0	0	0	0	0	0	0	0	0	0	0	0	0	0	0	0	0	0	0	0	0	0	0
1.6808267.G_A.clim-gs tmax	1	6808267	G	A	0.011976	INTRON	clim-gs tmax	AT1G19680	terminator	6807362	6808862	0	0	0	0	0	0	0	0	0	0	0	0	0	0	0	0	0	0	0	0	0	0	0	0	0	0	0	0	0	0	0	0	0	0	0	0	0	0
1.5256436.A_G.clim-bio4	1	5256436	A	G	0.0538922	UTR_3_PRIME	clim-bio4	AT1G15280	terminator	5256363	5257863	0	0	0	0	0	0	0	0	0	0	0	0	0	0	0	0	0	0	0	0	0	0	0	0	0	0	0	0	0	0	0	0	0	0	0	0	0	0
1.875976.A_G.clim-bio6	1	875976	A	G	0.0181087	INTERGENIC	clim-bio6	AT1G03510	terminator	875086	876586	0	0	0	0	0	0	0	0	0	0	0	0	0	0	0	0	0	0	0	0	0	0	0	0	0	0	0	0	0	0	0	0	0	0	0	0	0	0
1.29486094.C_T.DTF spain 2008 (2nd experiment)	1	29486094	C	T	0.0511364	INTERGENIC	DTF spain 2008 (2nd experiment)	AT1G78380	terminator	29485386	29486886	0	0	0	0	0	0	0	0	0	0	0	0	0	0	0	0	0	0	0	0	0	0	0	0	0	0	0	0	0	0	0	0	0	0	0	0	0	0
1.29606998.C_T.clim-bio4	1	29606998	C	T	0.0658683	INTRON	clim-bio4	AT1G78730	terminator	29606688	29608188	0	0	0	0	0	0	0	0	0	0	0	0	0	0	0	0	0	0	0	0	0	0	0	0	0	0	0	0	0	0	0	0	0	0	0	0	0	0
1.29613354.A_G.clim-bio4	1	29613354	A	G	0.0658683	NON_SYNONYMOUS_CODING	clim-bio4	AT1G78750	terminator	29611903	29613403	0	0	0	0	0	0	0	0	0	0	0	0	0	0	0	0	0	0	0	0	0	0	0	0	0	0	0	0	0	0	0	0	0	0	0	0	0	0
1.29588629.T_C.clim-bio4	1	29588629	T	C	0.0658683	INTERGENIC	clim-bio4	AT1G78660	terminator	29587889	29589389	0	0	0	0	0	0	0	0	0	0	0	0	0	0	0	0	0	0	0	0	0	0	0	0	0	0	0	0	0	0	0	0	0	0	0	0	0	0
1.29599480.A_C.clim-bio4	1	29599480	A	C	0.0658683	UTR_5_PRIME	clim-bio4	AT1G78690	terminator	29598162	29599662	0	0	0	0	0	0	0	0	0	0	0	0	0	0	0	0	0	0	0	0	0	0	0	0	0	0	0	0	0	0	0	0	0	0	0	0	0	0
1.29599402.T_C.clim-bio4	1	29599402	T	C	0.0658683	UTR_5_PRIME	clim-bio4	AT1G78690	terminator	29598162	29599662	0	0	0	0	0	0	0	0	0	0	0	0	0	0	0	0	0	0	0	0	0	0	0	0	0	0	0	0	0	0	0	0	0	0	0	0	0	0
1.29604899.A_T.clim-bio4	1	29604899	A	T	0.0658683	INTERGENIC	clim-bio4	AT1G78710	terminator	29604110	29605610	0	0	0	0	0	0	0	0	0	0	0	0	0	0	1	0	0	0	0	0	0	0	0	0	0	0	0	0	0	0	0	0	0	0	0	0	0	0
1.29484345.T_A.clim-bio4	1	29484345	T	A	0.0538922	UTR_3_PRIME	clim-bio4	AT1G78370	terminator	29483119	29484619	0	0	0	0	0	0	0	0	0	0	0	0	0	0	0	0	0	0	0	0	0	0	0	0	0	0	0	0	0	0	0	0	0	0	0	0	0	0
1.4835227.T_C.clim-bio9	1	4835227	T	C	0.012	INTERGENIC	clim-bio9	AT1G14130	terminator	4834723	4836223	0	0	0	0	0	0	0	0	0	0	0	0	0	0	0	0	0	0	0	0	0	0	0	0	0	0	0	0	0	0	0	0	0	0	0	0	0	0
1.3157493.C_G.clim-tmin11	1	3157493	C	G	0.0658683	INTERGENIC	clim-tmin11	AT1G09750	promoter	3156500	3158000	0	0	0	0	0	0	0	0	0	0	0	0	0	0	0	0	0	0	0	0	0	0	0	0	0	0	0	0	0	0	0	0	0	0	0	0	0	0
1.16538753.G_C.clim-tmax1	1	16538753	G	C	0.0558882	INTERGENIC	clim-tmax1	AT1G43765	terminator	16537591	16539091	0	0	0	0	0	0	0	0	0	0	0	0	0	0	0	0	0	0	0	0	0	0	0	0	0	0	0	0	0	0	0	0	0	0	0	0	0	0
1.29468901.A_T.clim-bio4	1	29468901	A	T	0.0558882	INTERGENIC	clim-bio4	AT1G78320	promoter	29467894	29469394	0	0	0	0	0	0	0	0	0	0	0	0	0	0	0	0	0	0	0	0	0	0	0	0	0	0	0	0	0	0	0	0	0	0	0	0	0	0
1.29465230.A_G.clim-bio4	1	29465230	A	G	0.0558882	INTERGENIC	clim-bio4	AT1G78310	promoter	29464749	29466249	0	0	0	0	0	0	0	0	0	0	0	0	0	0	0	0	0	0	0	0	0	0	0	0	0	0	0	0	0	0	0	-1	0	0	0	0	0	0
1.29521886.C_A.clim-bio4	1	29521886	C	A	0.0618762	SYNONYMOUS_CODING	clim-bio4	AT1G78470	promoter	29520769	29522269	0	0	0	0	0	0	0	0	0	0	0	0	0	0	0	0	0	0	0	0	0	0	0	0	0	0	0	0	0	0	0	0	0	0	0	0	0	0
1.2762414.T_A.clim-bio4	1	2762414	T	A	0.0159681	INTERGENIC	clim-bio4	AT1G08680	promoter	2761583	2763083	0	0	0	0	0	0	0	0	0	0	0	0	0	0	0	0	0	0	0	0	0	0	0	0	0	0	0	0	0	0	0	0	0	0	0	0	0	0
1.2762415.C_T.clim-bio4	1	2762415	C	T	0.0159681	INTERGENIC	clim-bio4	AT1G08680	promoter	2761583	2763083	0	0	0	0	0	0	0	0	0	0	0	0	0	0	0	0	0	0	0	0	0	0	0	0	0	0	0	0	0	0	0	0	0	0	0	0	0	0
1.5367454.T_A.clim-bio4	1	5367454	T	A	0.0199601	SYNONYMOUS_CODING	clim-bio4	AT1G15590	promoter	5366296	5367796	0	0	0	0	0	0	0	0	0	0	0	0	0	0	0	0	0	0	0	0	0	0	0	0	0	0	0	0	0	0	0	0	0	0	0	0	0	0
1.5367455.T_A.clim-bio4	1	5367455	T	A	0.0199601	NON_SYNONYMOUS_CODING	clim-bio4	AT1G15590	promoter	5366296	5367796	0	0	0	0	0	0	0	0	0	0	0	0	0	0	0	0	0	0	0	0	0	0	0	0	0	0	0	0	0	0	0	0	0	0	0	0	0	0
1.5367456.T_A.clim-bio4	1	5367456	T	A	0.0199601	STOP_GAINED	clim-bio4	AT1G15590	promoter	5366296	5367796	0	0	0	0	0	0	0	0	0	0	0	0	0	0	0	0	0	0	0	0	0	0	0	0	0	0	0	0	0	0	0	0	0	0	0	0	0	0
1.4838290.T_G.clim-bio4	1	4838290	T	G	0.0199601	NON_SYNONYMOUS_CODING	clim-bio4	AT1G14130	promoter	4837271	4838771	0	0	0	0	0	0	0	0	0	0	0	0	0	0	0	0	0	0	0	0	0	0	0	0	0	0	0	0	0	0	0	0	0	0	0	0	0	0
1.4837527.C_T.clim-bio4	1	4837527	C	T	0.0199601	UTR_5_PRIME	clim-bio4	AT1G14130	promoter	4837271	4838771	0	0	0	0	0	0	0	0	0	0	0	0	0	0	0	0	0	0	0	0	0	0	0	0	0	0	0	0	0	0	0	0	0	0	0	0	0	0
1.27855700.T_A.clim-bio9	1	27855700	T	A	0.012	UTR_5_PRIME	clim-bio9	AT1G74080	promoter	27854577	27856077	0	0	0	0	0	0	0	0	0	0	0	0	0	0	0	0	0	0	0	0	0	0	0	0	0	0	0	0	0	0	0	0	0	0	0	0	0	0
1.4832865.T_A.clim-bio4	1	4832865	T	A	0.0159681	INTERGENIC	clim-bio4	AT1G14110	terminator	4831415	4832915	0	0	0	0	0	0	0	0	0	0	0	0	0	0	0	0	0	0	0	0	0	0	0	0	0	0	0	0	0	0	0	0	0	0	0	0	0	0
1.29569119.T_G.clim-bio4	1	29569119	T	G	0.0678643	UTR_3_PRIME	clim-bio4	AT1G78610	terminator	29567960	29569460	0	0	0	0	0	0	0	0	0	0	0	0	0	0	0	0	0	0	0	0	0	0	0	0	0	0	0	0	0	0	0	0	0	0	0	0	0	0
1.1445986.C_T.clim-tmin1	1	1445986	C	T	0.0140281	INTERGENIC	clim-tmin1	AT1G05035	terminator	1445616	1447116	0	0	0	0	0	0	0	0	0	0	0	0	0	0	0	0	0	0	0	0	0	0	0	0	0	0	0	0	0	0	0	0	0	0	0	0	0	0
1.1242131.T_A.clim-tmax2	1	1242131	T	A	0.0239521	INTERGENIC	clim-tmax2	AT1G04550	terminator	1241657	1243157	0	0	0	0	0	0	0	0	0	0	0	0	0	0	0	0	0	0	1	0	0	0	0	0	0	0	0	0	0	0	0	0	0	0	0	0	0	0
1.11129207.C_T.clim-tmin3	1	11129207	C	T	0.0145228	UTR_3_PRIME	clim-tmin3	AT1G31163	terminator	11127731	11129231	0	0	0	0	0	0	0	0	0	0	0	0	0	0	0	0	0	0	0	0	0	0	0	0	0	0	0	0	0	0	0	0	0	0	0	0	0	0
1.11117431.A_T.clim-tmin3	1	11117431	A	T	0.0145228	INTERGENIC	clim-tmin3	AT1G31140	promoter	11116940	11118440	0	0	0	0	0	0	0	0	0	0	0	0	0	0	0	0	0	0	0	0	0	0	0	0	0	0	0	0	0	0	0	0	0	0	0	0	0	0
1.11117638.T_A.clim-tmin3	1	11117638	T	A	0.0145228	INTERGENIC	clim-tmin3	AT1G31140	promoter	11116940	11118440	0	0	0	0	0	0	0	0	0	0	0	0	0	0	0	0	0	0	0	0	0	0	0	0	0	0	0	0	0	0	0	0	0	0	0	0	0	0
1.11117847.A_C.clim-tmin3	1	11117847	A	C	0.0145228	INTERGENIC	clim-tmin3	AT1G31140	promoter	11116940	11118440	0	0	0	0	0	0	0	0	0	0	0	0	0	0	0	0	0	0	0	0	0	0	0	0	0	0	0	0	0	0	0	0	0	0	0	0	0	0
1.11119390.A_T.clim-tmin3	1	11119390	A	T	0.0145228	INTRON	clim-tmin3	AT1G31150	promoter	11118826	11120326	0	0	0	0	0	0	0	0	0	0	0	0	0	0	0	0	0	0	0	0	0	0	0	0	0	0	0	0	0	0	0	0	0	0	0	0	0	0
1.11124623.A_T.clim-tmin3	1	11124623	A	T	0.0145228	INTERGENIC	clim-tmin3	AT1G31160	promoter	11123720	11125220	0	0	0	0	0	0	0	0	0	0	0	0	0	0	0	0	0	0	0	0	0	0	0	0	0	0	0	0	0	0	0	0	0	0	0	0	0	0
1.985645.C_T.clim-bio9	1	985645	C	T	0.014	INTERGENIC	clim-bio9	AT1G03880	promoter	984750	986250	0	0	0	0	0	0	0	0	0	0	0	0	0	0	0	0	0	0	0	0	0	0	0	0	0	0	0	0	0	0	0	0	0	0	0	0	0	0
1.1542106.G_A.clim-tmax1	1	1542106	G	A	0.0199601	SYNONYMOUS_CODING	clim-tmax1	AT1G05291	promoter	1541932	1543432	0	0	0	0	0	0	0	0	0	0	0	0	0	0	0	0	0	0	0	0	0	0	0	0	0	0	0	0	0	0	0	0	0	0	0	0	0	0
1.1242036.A_G.clim-tmax2	1	1242036	A	G	0.0259481	UTR_3_PRIME	clim-tmax2	AT1G04550	terminator	1241657	1243157	0	0	0	0	0	0	0	0	0	0	0	0	0	0	0	0	0	0	0	0	0	0	0	0	0	0	0	0	0	0	0	0	0	0	0	0	0	0
1.1242107.T_G.clim-tmax2	1	1242107	T	G	0.0259481	UTR_3_PRIME	clim-tmax2	AT1G04550	terminator	1241657	1243157	0	0	0	0	0	0	0	0	0	0	0	0	0	0	0	0	0	0	1	0	0	0	0	0	0	0	0	0	0	0	0	0	0	0	0	0	0	0
1.1242321.T_C.clim-tmax2	1	1242321	T	C	0.0259481	INTERGENIC	clim-tmax2	AT1G04550	terminator	1241657	1243157	0	0	0	0	0	0	0	0	0	0	0	0	0	0	0	0	0	0	0	0	0	0	0	0	0	0	0	0	0	0	0	0	0	0	0	0	0	0
1.29465736.G_C.clim-bio4	1	29465736	G	C	0.0578842	INTERGENIC	clim-bio4	AT1G78310	promoter	29464749	29466249	0	0	0	0	0	0	0	0	0	0	0	0	0	0	0	0	0	0	0	0	0	0	0	0	0	0	0	0	0	0	0	0	0	0	0	0	0	0
1.25575144.G_A.clim-gs tmax	1	25575144	G	A	0.011976	UTR_3_PRIME	clim-gs tmax	AT1G68240	terminator	25573863	25575363	0	0	0	0	0	0	0	0	0	0	0	0	0	0	0	0	0	0	0	0	0	0	0	0	0	0	0	0	0	0	0	0	0	0	0	0	0	0
1.25587411.A_G.clim-gs tmax	1	25587411	A	G	0.011976	INTRON	clim-gs tmax	AT1G68270	terminator	25587190	25588690	0	0	0	0	0	0	0	0	0	0	0	0	0	0	0	0	0	0	0	0	0	0	0	0	0	0	0	0	0	0	0	0	0	0	0	0	0	0
1.25587774.G_A.clim-gs tmax	1	25587774	G	A	0.011976	INTERGENIC	clim-gs tmax	AT1G68270	terminator	25587190	25588690	0	0	0	0	0	0	0	0	0	0	0	0	0	0	0	0	0	0	0	0	0	0	0	0	0	0	0	0	0	0	0	0	0	0	0	0	0	0
1.25554167.T_C.clim-gs tmax	1	25554167	T	C	0.011976	NON_SYNONYMOUS_CODING	clim-gs tmax	AT1G68170	terminator	25553971	25555471	0	0	0	0	0	0	0	0	0	0	0	0	0	0	0	0	0	0	0	0	0	0	0	0	0	0	0	0	0	0	0	0	0	0	0	0	0	0
1.25580699.C_T.clim-gs tmax	1	25580699	C	T	0.011976	INTERGENIC	clim-gs tmax	AT1G68250	promoter	25579699	25581199	0	0	0	0	0	0	0	0	0	0	0	0	0	0	0	0	0	0	0	0	0	0	0	0	0	0	0	0	0	0	0	0	0	0	0	0	0	0
1.25590938.G_A.clim-gs tmax	1	25590938	G	A	0.011976	INTERGENIC	clim-gs tmax	AT1G68270	promoter	25589754	25591254	0	0	0	0	0	0	0	0	0	0	0	0	0	0	0	0	0	0	0	0	0	0	0	0	0	0	0	0	0	0	0	0	0	0	0	0	0	0
1.25549482.T_C.clim-gs tmax	1	25549482	T	C	0.011976	INTERGENIC	clim-gs tmax	AT1G68160	promoter	25548394	25549894	0	0	0	0	0	0	0	0	0	0	0	0	0	0	0	0	0	0	0	0	0	0	0	0	0	0	0	0	0	0	0	0	0	0	0	0	0	0
1.25573959.G_A.clim-gs tmax	1	25573959	G	A	0.011976	INTERGENIC	clim-gs tmax	AT1G68240	terminator	25573863	25575363	0	0	0	0	0	0	0	0	0	0	0	0	0	0	0	0	0	0	0	0	0	0	0	0	0	0	0	0	0	0	0	0	0	0	0	0	0	0
1.25600348.G_C.clim-gs tmax	1	25600348	G	C	0.011976	INTRON	clim-gs tmax	AT1G68300	promoter	25598850	25600350	0	0	0	0	0	0	0	0	0	0	0	0	0	0	0	0	0	0	0	0	0	0	0	0	0	0	0	0	0	0	0	0	0	0	0	0	0	0
1.25549568.T_G.clim-gs tmax	1	25549568	T	G	0.011976	INTERGENIC	clim-gs tmax	AT1G68160	promoter	25548394	25549894	0	0	0	0	0	0	0	0	0	0	0	0	0	0	0	0	0	0	0	0	0	0	0	0	0	0	0	0	0	0	0	0	0	0	0	0	0	0
1.25566323.C_T.clim-gs tmax	1	25566323	C	T	0.011976	INTRON	clim-gs tmax	AT1G68210	promoter	25564982	25566482	0	0	0	0	0	0	0	0	0	0	0	0	0	0	0	0	0	0	0	0	0	0	0	0	-1	0	0	0	0	0	0	0	0	0	0	0	0	0
1.25600346.C_T.clim-gs tmax	1	25600346	C	T	0.011976	INTRON	clim-gs tmax	AT1G68300	promoter	25598850	25600350	0	0	0	0	0	0	0	0	0	0	0	0	0	0	0	0	0	0	0	0	0	0	0	0	0	0	0	0	0	0	0	0	0	0	0	0	0	0
1.1560037.A_G.clim-tmax1	1	1560037	A	G	0.0219561	INTERGENIC	clim-tmax1	AT1G05350	terminator	1559677	1561177	0	0	0	0	0	0	0	0	0	0	0	0	0	0	0	0	0	0	0	0	0	0	0	0	0	0	0	0	0	0	0	0	0	0	0	0	0	0
1.27736570.G_T.clim-bio6	1	27736570	G	T	0.0684105	INTERGENIC	clim-bio6	AT1G73740	terminator	27735863	27737363	0	0	0	0	0	0	0	0	0	0	0	0	0	0	0	0	0	0	0	0	0	0	0	0	0	0	0	0	0	0	0	0	0	0	0	0	0	0
1.27828292.A_T.clim-bio6	1	27828292	A	T	0.0684105	INTRON	clim-bio6	AT1G74000	terminator	27828050	27829550	0	0	0	0	0	0	0	0	0	0	0	0	0	0	0	0	0	0	0	0	0	0	0	0	0	0	0	0	0	0	0	0	0	0	0	0	0	0
1.29621900.G_A.clim-bio4	1	29621900	G	A	0.0678643	SYNONYMOUS_CODING	clim-bio4	AT1G78770	terminator	29620947	29622447	0	0	0	0	0	0	0	0	0	0	0	0	0	0	0	0	0	0	0	0	0	0	0	0	0	0	0	0	0	0	0	0	0	0	0	0	0	0
1.1312793.T_C.clim-tmax1	1	1312793	T	C	0.011976	INTERGENIC	clim-tmax1	AT1G04690	promoter	1312442	1313942	0	0	0	0	0	0	0	0	0	0	0	0	0	0	0	0	0	0	0	0	0	0	0	0	0	0	0	0	0	0	0	0	0	0	0	0	0	0
1.1344939.A_G.clim-tmax1	1	1344939	A	G	0.011976	INTERGENIC	clim-tmax1	AT1G04790	promoter	1343988	1345488	0	0	0	0	0	0	0	0	0	0	0	0	0	0	0	0	0	0	0	0	0	0	0	0	0	0	0	0	0	0	0	0	0	0	0	0	0	0
1.1355132.G_A.clim-tmax1	1	1355132	G	A	0.011976	SYNONYMOUS_CODING	clim-tmax1	AT1G04820	terminator	1355083	1356583	0	1	0	0	0	0	0	0	0	0	0	0	0	0	0	0	0	0	0	0	0	0	0	0	0	0	0	-1	0	0	0	0	0	0	0	0	0	0
1.1380717.A_C.clim-tmax1	1	1380717	A	C	0.011976	UTR_3_PRIME	clim-tmax1	AT1G04890	terminator	1379381	1380881	0	0	0	0	0	0	0	0	0	0	0	0	0	0	0	0	0	0	0	0	0	0	0	0	0	0	0	0	0	0	0	0	0	0	0	0	0	0
1.1396433.T_A.clim-tmax1	1	1396433	T	A	0.011976	UTR_3_PRIME	clim-tmax1	AT1G04930	terminator	1395264	1396764	0	0	0	0	0	0	0	0	0	0	0	0	0	0	0	0	0	0	0	0	0	0	0	0	0	0	0	0	0	0	0	0	0	0	0	0	0	0
1.1404094.T_C.clim-tmax1	1	1404094	T	C	0.011976	NON_SYNONYMOUS_CODING	clim-tmax1	AT1G04945	terminator	1402612	1404112	0	0	0	0	0	0	0	0	0	0	0	0	0	0	0	0	0	0	0	0	0	0	0	0	0	0	0	0	0	0	0	0	0	0	0	0	0	0
1.1412833.A_T.clim-tmax1	1	1412833	A	T	0.011976	NON_SYNONYMOUS_CODING	clim-tmax1	AT1G04980	terminator	1412643	1414143	0	0	0	0	0	0	0	0	0	0	0	0	0	0	0	0	0	0	0	0	0	0	0	0	0	0	0	0	0	0	0	0	0	0	0	0	0	0
1.1568146.T_A.clim-tmax1	1	1568146	T	A	0.011976	INTERGENIC	clim-tmax1	AT1G05360	terminator	1567008	1568508	0	0	0	0	0	0	0	0	0	1	0	0	0	0	0	0	0	0	0	0	0	0	0	0	0	0	0	0	0	0	0	0	0	0	0	0	0	0
1.1355680.C_A.clim-tmax1	1	1355680	C	A	0.011976	INTERGENIC	clim-tmax1	AT1G04820	terminator	1355083	1356583	0	0	0	0	0	0	0	0	0	0	0	0	0	0	0	0	0	0	0	0	0	0	0	0	0	0	0	0	0	0	0	0	0	0	0	0	0	0
1.1382417.C_T.clim-tmax1	1	1382417	C	T	0.011976	NON_SYNONYMOUS_CODING	clim-tmax1	AT1G04890	promoter	1382099	1383599	0	0	0	0	0	0	0	0	0	0	0	0	0	0	0	0	0	0	0	0	0	0	0	0	0	0	0	0	0	0	0	0	0	0	0	0	0	0
1.1412960.C_A.clim-tmax1	1	1412960	C	A	0.011976	INTRON	clim-tmax1	AT1G04980	terminator	1412643	1414143	0	0	0	0	0	0	0	0	0	0	0	0	0	0	0	0	0	0	0	0	0	0	0	0	0	0	0	0	0	0	0	0	0	0	0	0	0	0
1.1429976.C_T.clim-tmax1	1	1429976	C	T	0.011976	INTERGENIC	clim-tmax1	AT1G05005	terminator	1429556	1431056	0	0	0	0	0	0	0	0	0	0	0	0	0	0	0	0	0	0	0	0	0	0	0	0	0	0	0	0	0	0	0	0	0	0	0	0	0	0
1.1461641.G_C.clim-tmax1	1	1461641	G	C	0.011976	INTRON	clim-tmax1	AT1G05085	terminator	1461170	1462670	0	0	0	0	0	0	0	0	0	0	0	0	0	0	0	0	0	0	0	0	0	0	0	0	0	0	0	0	0	0	0	0	0	0	0	0	0	0
1.1462357.C_T.clim-tmax1	1	1462357	C	T	0.011976	INTERGENIC	clim-tmax1	AT1G05085	terminator	1461170	1462670	0	0	0	0	0	0	0	0	0	0	0	0	0	0	0	0	0	0	0	0	0	0	0	0	0	0	0	0	0	0	0	0	0	0	0	0	0	0
1.1343723.G_A.clim-tmax1	1	1343723	G	A	0.011976	INTERGENIC	clim-tmax1	AT1G04780	promoter	1343293	1344793	0	0	0	0	0	0	0	0	0	0	0	0	0	0	0	0	0	0	0	0	0	0	-1	0	0	0	0	0	0	0	0	0	0	0	0	0	0	0
1.1406950.G_T.clim-tmax1	1	1406950	G	T	0.011976	SYNONYMOUS_CODING	clim-tmax1	AT1G04960	terminator	1406771	1408271	0	0	0	0	0	0	0	0	0	0	0	0	0	0	0	0	0	0	0	0	0	0	0	0	0	0	0	0	0	0	0	0	0	0	0	0	0	0
1.1410923.G_C.clim-tmax1	1	1410923	G	C	0.011976	INTERGENIC	clim-tmax1	AT1G04960	promoter	1410433	1411933	0	0	0	0	0	0	0	0	0	0	0	0	0	0	0	0	0	0	0	0	0	1	0	0	0	0	0	0	0	0	0	0	0	0	0	0	0	0
1.1422205.C_A.clim-tmax1	1	1422205	C	A	0.011976	INTERGENIC	clim-tmax1	AT1G04990	promoter	1421363	1422863	0	0	0	0	0	0	0	0	0	0	0	0	0	0	0	0	0	0	0	0	0	0	0	0	0	0	0	0	0	0	0	0	0	0	0	0	0	0
1.1422478.C_T.clim-tmax1	1	1422478	C	T	0.011976	INTERGENIC	clim-tmax1	AT1G04990	promoter	1421363	1422863	0	0	0	0	0	0	0	0	0	0	0	0	0	0	0	0	0	0	0	0	0	0	0	0	0	0	0	0	0	0	0	0	0	0	0	0	0	0
1.1460980.A_C.clim-tmax1	1	1460980	A	C	0.011976	INTERGENIC	clim-tmax1	AT1G05085	promoter	1459987	1461487	0	0	0	0	0	0	0	0	0	0	0	0	0	0	0	0	0	0	0	0	0	0	0	0	0	0	0	0	0	0	0	0	0	0	0	0	0	0
1.1364314.T_C.clim-tmax1	1	1364314	T	C	0.011976	NON_SYNONYMOUS_CODING	clim-tmax1	AT1G04850	terminator	1364106	1365606	0	0	0	0	0	0	0	0	0	0	0	0	0	0	0	0	0	0	0	0	0	0	0	0	0	0	0	0	0	0	0	0	0	0	0	0	0	0
1.1379059.A_G.clim-tmax1	1	1379059	A	G	0.011976	INTRON	clim-tmax1	AT1G04880	promoter	1378728	1380228	0	0	0	0	0	0	0	0	0	0	0	0	0	0	0	0	0	0	0	0	0	0	0	0	0	0	0	0	0	0	0	0	0	0	0	0	0	0
1.1385940.A_T.clim-tmax1	1	1385940	A	T	0.011976	INTRON	clim-tmax1	AT1G04297	promoter	1385632	1387132	0	0	0	0	0	0	0	0	0	0	0	0	0	0	0	0	0	0	0	0	0	0	0	0	0	0	0	0	0	0	0	0	0	0	0	0	0	0
1.1395345.A_C.clim-tmax1	1	1395345	A	C	0.011976	NON_SYNONYMOUS_CODING	clim-tmax1	AT1G04930	terminator	1395264	1396764	0	0	0	0	0	0	0	0	0	0	0	0	0	0	0	0	0	0	0	0	0	0	0	0	0	0	0	0	0	0	0	0	0	0	0	0	0	0
1.1396903.T_A.clim-tmax1	1	1396903	T	A	0.011976	INTRON	clim-tmax1	AT1G04920	promoter	1395453	1396953	0	0	0	0	0	0	0	0	0	0	0	0	0	0	0	0	0	0	0	0	0	0	0	0	0	0	0	0	0	0	0	0	0	0	0	0	0	0
1.1399839.T_C.clim-tmax1	1	1399839	T	C	0.011976	INTRON	clim-tmax1	AT1G04930	promoter	1398622	1400122	0	0	0	0	0	0	0	0	0	0	0	0	0	0	0	0	0	0	0	0	0	0	0	0	0	0	0	0	0	0	0	0	0	0	0	0	0	0
1.1410558.G_A.clim-tmax1	1	1410558	G	A	0.011976	INTRON	clim-tmax1	AT1G04960	promoter	1410433	1411933	0	0	0	0	0	0	0	0	0	0	0	0	0	0	0	0	0	0	0	0	0	0	0	0	0	0	0	0	0	0	0	0	0	0	0	0	0	0
1.1422204.A_C.clim-tmax1	1	1422204	A	C	0.011976	INTERGENIC	clim-tmax1	AT1G04990	promoter	1421363	1422863	0	0	0	0	0	0	0	0	0	0	0	0	0	0	0	0	0	0	0	0	0	0	0	0	0	0	0	1	0	0	0	0	0	0	0	0	0	0
1.1425794.T_A.clim-tmax1	1	1425794	T	A	0.011976	SYNONYMOUS_CODING	clim-tmax1	AT1G05000	promoter	1424538	1426038	0	0	0	0	0	0	0	0	0	0	0	0	0	0	0	0	0	0	0	0	0	0	0	0	0	0	0	0	0	0	0	0	0	0	0	0	0	0
1.1453527.C_T.clim-tmax1	1	1453527	C	T	0.011976	INTRAGENIC	clim-tmax1	AT1G05060	promoter	1452372	1453872	0	0	0	0	0	0	0	0	0	0	0	0	0	0	0	0	0	0	0	0	0	0	0	0	0	0	0	0	0	0	0	0	0	0	0	0	0	0
1.1312986.C_A.clim-tmax1	1	1312986	C	A	0.011976	INTERGENIC	clim-tmax1	AT1G04690	promoter	1312442	1313942	0	0	0	0	0	0	0	0	0	0	0	0	0	0	0	0	0	0	0	0	0	0	0	0	0	0	0	0	0	0	0	0	0	0	0	0	-1	0
1.1316397.C_A.clim-tmax1	1	1316397	C	A	0.011976	UTR_5_PRIME	clim-tmax1	AT1G04700	promoter	1315138	1316638	0	0	0	0	0	0	0	0	0	0	0	0	0	0	0	0	0	0	0	0	0	0	0	0	0	0	0	0	0	0	0	0	0	0	0	0	0	0
1.1316535.T_A.clim-tmax1	1	1316535	T	A	0.011976	INTRON	clim-tmax1	AT1G04700	promoter	1315138	1316638	0	0	0	0	0	0	0	0	0	0	1	0	0	0	0	0	0	0	0	0	0	0	0	0	0	0	0	0	0	0	0	0	0	0	0	0	0	0
1.1331095.A_G.clim-tmax1	1	1331095	A	G	0.011976	INTERGENIC	clim-tmax1	AT1G04730	promoter	1330669	1332169	0	0	0	0	0	0	0	0	0	0	0	0	0	0	0	0	0	0	0	0	0	0	0	0	0	0	0	0	0	0	0	0	0	0	0	0	0	0
1.1358784.A_T.clim-tmax1	1	1358784	A	T	0.011976	STOP_LOST	clim-tmax1	AT1G04820	promoter	1358047	1359547	0	0	0	0	0	0	0	0	0	0	0	0	0	0	0	0	0	0	0	0	0	0	0	0	0	0	0	0	0	0	0	0	0	0	0	0	0	0
1.1379058.G_A.clim-tmax1	1	1379058	G	A	0.011976	INTRON	clim-tmax1	AT1G04880	promoter	1378728	1380228	0	0	0	0	0	0	0	0	0	0	0	0	0	0	0	0	0	0	0	0	0	0	0	0	0	0	0	0	0	0	0	0	0	0	0	0	0	0
1.1418444.A_G.clim-tmax1	1	1418444	A	G	0.011976	UTR_5_PRIME	clim-tmax1	AT1G04990	terminator	1417611	1419111	0	0	1	0	0	0	0	0	0	0	0	0	0	0	0	0	0	0	0	0	0	0	0	0	0	0	0	0	0	0	0	0	0	0	0	0	0	0
1.1446108.G_A.clim-tmax1	1	1446108	G	A	0.011976	INTERGENIC	clim-tmax1	AT1G05035	terminator	1445616	1447116	0	0	0	0	0	0	0	0	0	0	0	0	0	0	0	0	0	0	0	0	0	0	0	0	0	0	0	0	0	0	0	0	0	0	0	0	0	0
1.1447883.A_G.clim-tmax1	1	1447883	A	G	0.011976	INTRON	clim-tmax1	AT1G05055	terminator	1447630	1449130	0	0	0	0	0	0	0	0	0	0	0	0	0	0	0	0	0	0	0	0	0	0	0	0	0	0	0	0	0	0	0	0	0	0	0	0	0	0
1.1448090.C_T.clim-tmax1	1	1448090	C	T	0.011976	INTRON	clim-tmax1	AT1G05040	promoter	1447963	1449463	0	0	0	0	0	0	0	0	0	0	0	0	0	0	0	0	0	0	0	0	0	0	0	0	0	0	0	0	0	0	0	0	0	0	0	0	0	0
1.1456297.C_T.clim-tmax1	1	1456297	C	T	0.011976	INTERGENIC	clim-tmax1	AT1G05070	terminator	1456006	1457506	0	0	0	0	0	0	0	0	0	0	0	0	0	0	0	0	0	0	0	0	0	0	0	0	0	0	0	0	0	0	0	0	0	0	0	0	0	0
1.1456673.T_A.clim-tmax1	1	1456673	T	A	0.011976	INTERGENIC	clim-tmax1	AT1G05070	terminator	1456006	1457506	0	0	0	0	0	0	0	0	0	0	0	0	0	0	0	0	0	0	0	0	0	0	0	0	0	0	0	0	0	0	0	0	0	0	0	0	0	0
1.1458867.T_G.clim-tmax1	1	1458867	T	G	0.011976	INTERGENIC	clim-tmax1	AT1G05070	promoter	1458302	1459802	0	0	0	0	0	0	0	0	0	0	0	0	0	0	0	0	0	0	0	0	0	0	0	0	0	0	0	0	0	0	0	0	0	0	0	0	0	0
1.701689.A_G.clim-aet12	1	701689	A	G	0.0199601	INTRON	clim-aet12	AT1G03030	promoter	700364	701864	0	0	0	0	0	0	0	0	0	0	0	0	0	0	0	0	0	0	0	0	0	0	0	0	0	0	0	0	0	0	0	0	0	0	0	0	0	0
1.29604989.G_A.clim-bio4	1	29604989	G	A	0.0698603	INTERGENIC	clim-bio4	AT1G78710	terminator	29604110	29605610	0	0	0	0	0	0	0	0	0	0	0	0	0	0	0	0	0	0	0	0	0	0	0	0	0	0	0	0	0	0	0	0	0	0	0	0	0	0
1.1242156.T_A.clim-tmax2	1	1242156	T	A	0.0279441	INTERGENIC	clim-tmax2	AT1G04550	terminator	1241657	1243157	0	0	0	0	0	0	0	0	0	0	0	0	0	0	0	0	0	0	0	0	0	0	0	0	0	0	0	0	0	0	0	0	0	0	0	0	0	0
1.1242311.C_T.clim-tmax2	1	1242311	C	T	0.0279441	INTERGENIC	clim-tmax2	AT1G04550	terminator	1241657	1243157	0	0	0	0	0	0	0	0	0	0	0	0	0	0	0	0	0	0	0	0	0	0	0	0	0	0	0	0	0	0	0	0	0	0	0	0	0	0
1.1540303.A_G.clim-tmin6	1	1540303	A	G	0.011976	NON_SYNONYMOUS_CODING	clim-tmin6	AT1G05290	promoter	1540062	1541562	0	0	0	0	0	0	0	0	0	0	0	0	0	0	0	0	0	0	1	0	0	0	0	0	0	0	0	0	0	0	0	0	0	0	0	0	0	0
1.21014717.C_T.clim-gs9	1	21014717	C	T	0.0199601	INTERGENIC	clim-gs9	AT1G56145	promoter	21013595	21015095	0	0	0	0	0	0	0	0	0	0	0	0	0	0	0	0	0	0	0	0	0	0	0	0	0	0	0	0	0	0	0	0	0	0	0	0	0	0
1.27759539.G_T.clim-bio9	1	27759539	G	T	0.012	INTERGENIC	clim-bio9	AT1G73830	promoter	27758940	27760440	0	0	0	0	0	0	0	0	0	0	0	0	0	0	0	0	0	0	0	0	0	-1	0	0	0	0	0	0	0	0	0	0	0	0	0	0	0	0
1.23117566.A_T.clim-aet12	1	23117566	A	T	0.011976	INTERGENIC	clim-aet12	AT1G62450	promoter	23117094	23118594	0	0	0	0	0	0	0	0	0	0	0	0	0	0	0	0	0	0	0	0	0	0	0	0	0	0	0	0	0	0	0	0	0	0	0	0	0	0
1.29511791.A_T.clim-bio4	1	29511791	A	T	0.0618762	NON_SYNONYMOUS_CODING	clim-bio4	AT1G78440	terminator	29510560	29512060	0	0	0	0	0	0	0	0	0	0	0	0	0	0	0	0	0	0	0	0	0	0	0	0	0	0	0	0	0	0	0	0	0	0	0	0	0	0
1.28247267.T_A.clim-gs8	1	28247267	T	A	0.0139721	INTERGENIC	clim-gs8	AT1G75260	promoter	28246640	28248140	0	0	0	0	0	0	0	0	0	0	0	0	0	0	0	0	0	0	0	0	0	0	0	0	0	0	0	0	0	0	0	0	0	0	0	0	0	0
1.1475858.G_C.clim-tmin6	1	1475858	G	C	0.011976	INTRON	clim-tmin6	AT1G05120	promoter	1475789	1477289	0	0	0	0	0	0	0	0	0	0	0	0	0	0	0	0	0	0	0	0	0	0	0	0	0	0	0	0	0	0	0	0	0	0	0	0	0	0
1.5331396.C_A.clim-bio4	1	5331396	C	A	0.0179641	NON_SYNONYMOUS_CODING	clim-bio4	AT1G15510	terminator	5331211	5332711	0	0	0	0	0	0	0	0	0	0	0	0	0	0	0	0	0	0	0	0	0	0	0	0	0	0	0	0	0	0	0	0	0	0	0	0	0	0
1.5323867.G_C.clim-bio4	1	5323867	G	C	0.0179641	UTR_5_PRIME	clim-bio4	AT1G15490	promoter	5323395	5324895	0	0	0	0	0	0	0	0	0	0	0	0	0	0	0	0	0	0	0	0	0	0	0	0	0	0	0	0	0	0	0	0	0	0	0	0	0	0
1.5215225.G_C.clim-bio4	1	5215225	G	C	0.107784	INTERGENIC	clim-bio4	AT1G15160	promoter	5214344	5215844	0	0	0	0	0	0	0	0	0	0	0	0	0	0	0	0	0	0	0	0	0	0	0	0	0	0	0	0	0	0	0	0	0	0	0	0	0	0
1.24505063.C_T.clim-bio9	1	24505063	C	T	0.012	INTRAGENIC	clim-bio9	AT1G65870	terminator	24503890	24505390	0	0	0	0	0	0	0	0	0	0	0	0	0	0	0	0	0	0	0	0	0	0	0	0	0	0	0	0	0	0	0	0	0	0	0	0	0	0
1.24538774.A_G.clim-bio9	1	24538774	A	G	0.012	INTERGENIC	clim-bio9	AT1G65930	promoter	24537885	24539385	0	0	0	0	0	0	0	0	0	0	0	0	0	0	0	0	0	0	0	0	0	0	0	0	0	0	0	0	0	0	0	0	0	0	0	0	0	0
1.24512654.C_G.clim-bio9	1	24512654	C	G	0.012	NON_SYNONYMOUS_CODING	clim-bio9	AT1G65890	terminator	24511437	24512937	0	0	0	0	0	0	0	0	0	0	0	0	0	0	0	0	0	0	0	0	0	0	0	0	0	0	0	0	0	0	0	0	0	0	0	0	0	0
1.11128348.C_T.clim-tmin3	1	11128348	C	T	0.0165975	INTERGENIC	clim-tmin3	AT1G31163	terminator	11127731	11129231	0	0	0	0	0	0	0	0	0	0	0	0	0	0	0	0	0	0	0	0	0	0	0	0	0	0	0	0	0	0	0	0	0	0	0	0	0	0
1.9163014.C_G.GR21 cold	1	9163014	C	G	0.076087	INTERGENIC	GR21 cold	AT1G26520	terminator	9162210	9163710	0	0	0	0	0	0	0	0	0	0	0	-1	0	0	0	0	0	0	0	0	0	0	0	0	0	0	0	0	0	0	0	0	0	0	0	0	0	0
1.9108165.T_C.GR21 cold	1	9108165	T	C	0.076087	INTRON	GR21 cold	AT1G26320	terminator	9106731	9108231	0	0	0	0	0	0	0	0	0	0	0	0	0	0	0	0	0	0	0	0	0	0	0	0	0	0	0	0	0	0	0	0	0	0	0	0	0	0
1.9114737.G_A.GR21 cold	1	9114737	G	A	0.076087	SYNONYMOUS_CODING	GR21 cold	AT1G26340	terminator	9114477	9115977	0	0	0	0	0	0	0	0	0	0	0	0	0	0	0	0	0	0	0	0	0	0	0	0	0	0	0	0	0	0	0	0	0	0	0	0	0	0
1.4145045.A_G.avrPphB	1	4145045	A	G	0.4	NON_SYNONYMOUS_CODING	avrPphB	AT1G12211	promoter	4143614	4145114	0	0	0	0	0	0	0	0	0	0	0	0	0	0	0	0	0	0	0	0	0	0	0	0	0	0	0	0	0	0	0	0	0	0	0	0	0	0
1.12263603.T_A.clim-aet5	1	12263603	T	A	0.0139721	INTERGENIC	clim-aet5	AT1G33800	terminator	12262250	12263750	0	0	0	0	0	0	0	0	0	0	0	0	0	0	0	0	0	0	0	0	0	0	0	0	0	0	0	0	0	0	0	0	0	0	0	0	0	0
1.12264042.G_A.clim-aet5	1	12264042	G	A	0.0139721	INTERGENIC	clim-aet5	AT1G33810	promoter	12263941	12265441	0	0	0	0	0	0	0	0	0	0	0	0	0	0	0	0	0	0	0	0	0	0	0	0	0	0	0	0	0	0	0	0	0	0	0	0	0	0
1.12294448.C_T.clim-aet5	1	12294448	C	T	0.0139721	STOP_GAINED	clim-aet5	AT1G33860	promoter	12293393	12294893	0	0	0	0	0	0	0	0	0	0	0	0	0	0	0	0	0	0	0	0	0	0	0	0	0	0	0	0	0	0	0	0	0	0	0	0	0	0
1.12303364.T_C.clim-aet5	1	12303364	T	C	0.0139721	INTERGENIC	clim-aet5	AT1G33880	terminator	12302861	12304361	0	0	0	0	0	0	0	0	0	0	0	0	0	0	0	0	0	0	0	0	0	0	0	0	0	0	0	0	0	0	0	0	0	0	0	0	0	0
1.12297840.A_G.clim-aet5	1	12297840	A	G	0.0139721	INTERGENIC	clim-aet5	AT1G06713	promoter	12297025	12298525	0	0	0	0	0	0	0	0	0	0	0	0	0	0	0	0	0	0	0	0	0	0	0	0	0	0	0	0	0	0	0	0	0	0	0	0	0	0
1.12306148.C_T.clim-aet5	1	12306148	C	T	0.0139721	INTERGENIC	clim-aet5	AT1G33880	promoter	12304703	12306203	0	0	0	0	0	0	0	0	0	0	0	0	0	0	0	0	0	0	0	0	0	0	0	0	0	0	0	0	0	0	0	0	0	0	0	0	0	0
1.12263238.A_T.clim-aet5	1	12263238	A	T	0.0139721	INTERGENIC	clim-aet5	AT1G33800	terminator	12262250	12263750	0	0	0	0	0	0	0	0	0	0	0	0	0	0	0	0	0	0	0	0	0	0	0	0	0	0	0	0	0	0	0	0	0	0	0	0	0	0
1.12304875.T_C.clim-aet5	1	12304875	T	C	0.0139721	NON_SYNONYMOUS_CODING	clim-aet5	AT1G33880	promoter	12304703	12306203	0	1	0	0	0	0	0	0	0	0	0	0	0	0	0	0	0	0	0	0	0	0	0	0	0	0	0	0	0	0	0	0	0	0	0	0	0	0
1.12302980.G_A.clim-aet5	1	12302980	G	A	0.0139721	INTERGENIC	clim-aet5	AT1G33880	terminator	12302861	12304361	0	0	0	0	0	0	0	0	0	0	0	0	0	0	0	0	0	0	0	0	0	0	0	0	0	0	0	0	0	0	0	0	0	0	0	0	0	0
1.13699627.G_A.clim-bio4	1	13699627	G	A	0.0618762	INTERGENIC	clim-bio4	AT1G36370	promoter	13698239	13699739	0	0	0	0	0	0	0	0	0	0	0	0	0	0	0	0	0	0	0	0	0	0	0	0	0	0	0	0	0	0	0	0	0	0	0	0	0	0
1.24555336.G_C.clim-tmin3	1	24555336	G	C	0.0145228	INTRON	clim-tmin3	AT1G08797	terminator	24554534	24556034	0	0	0	0	0	0	0	0	0	0	0	0	0	0	0	0	0	0	0	0	0	0	0	0	0	0	0	0	0	0	0	0	0	0	0	0	1	0
1.24573879.G_T.clim-tmin3	1	24573879	G	T	0.0145228	INTERGENIC	clim-tmin3	AT1G66000	promoter	24573343	24574843	0	0	0	0	0	0	0	0	0	0	0	0	0	0	0	0	0	0	0	0	0	0	0	0	0	0	0	0	0	0	0	0	0	0	0	0	0	0
1.24573887.C_G.clim-tmin3	1	24573887	C	G	0.0145228	INTERGENIC	clim-tmin3	AT1G66000	promoter	24573343	24574843	0	0	0	0	0	0	0	0	0	0	0	0	0	0	0	0	0	0	0	0	0	0	0	0	0	0	0	0	0	0	0	0	0	0	0	0	0	0
1.24577476.T_C.clim-tmin3	1	24577476	T	C	0.0145228	INTERGENIC	clim-tmin3	AT1G66020	promoter	24576543	24578043	0	0	0	0	0	0	0	0	0	0	0	0	0	0	0	0	0	0	0	0	0	0	0	0	0	0	0	0	0	0	0	0	0	0	0	0	0	0
1.730099.T_C.clim-aet12	1	730099	T	C	0.0159681	INTRON	clim-aet12	AT1G03070	promoter	728829	730329	0	0	0	0	0	0	0	0	0	0	0	0	0	0	0	0	0	0	0	0	0	0	0	0	0	0	0	0	0	0	0	0	0	0	0	0	0	0
1.8383033.T_A.clim-tmax12	1	8383033	T	A	0.0159681	INTERGENIC	clim-tmax12	AT1G23700	promoter	8381790	8383290	0	0	0	0	0	0	0	0	0	0	0	0	0	0	0	0	0	0	0	0	0	0	0	0	0	0	0	0	0	0	0	0	0	0	0	0	0	0
1.1531316.G_A.clim-tmin6	1	1531316	G	A	0.011976	UTR_3_PRIME	clim-tmin6	AT1G05270	terminator	1530640	1532140	0	0	0	0	0	0	0	0	0	0	0	0	0	0	0	0	0	0	0	0	0	0	0	0	-1	0	0	0	0	0	0	0	0	0	0	0	0	0
1.1529279.A_T.clim-tmin6	1	1529279	A	T	0.011976	INTERGENIC	clim-tmin6	AT1G05260	promoter	1528766	1530266	0	0	0	0	0	0	0	0	0	0	0	0	0	0	0	0	0	0	0	0	0	0	0	0	0	0	0	0	0	0	0	0	0	0	0	0	0	0
1.1534089.C_T.clim-tmin6	1	1534089	C	T	0.011976	NON_SYNONYMOUS_CODING	clim-tmin6	AT1G05280	terminator	1533829	1535329	0	0	0	0	0	0	0	0	0	0	0	0	0	0	0	0	0	0	0	0	0	0	0	0	0	0	0	0	0	0	0	0	0	0	0	0	0	0
1.1534225.A_G.clim-tmin6	1	1534225	A	G	0.011976	SYNONYMOUS_CODING	clim-tmin6	AT1G05280	terminator	1533829	1535329	0	0	0	0	0	0	0	0	0	0	0	0	0	0	0	0	0	0	0	0	0	0	0	0	0	0	0	0	0	0	0	0	0	0	0	0	0	0
1.1535055.A_G.clim-tmin6	1	1535055	A	G	0.011976	INTERGENIC	clim-tmin6	AT1G05270	promoter	1534267	1535767	0	0	0	0	0	0	0	0	0	0	0	0	0	0	0	0	0	0	0	0	0	0	0	0	0	0	0	0	0	0	0	0	0	0	0	0	0	0
1.24778463.C_T.clim-bio15	1	24778463	C	T	0.0139721	NON_SYNONYMOUS_CODING	clim-bio15	AT1G66430	promoter	24777256	24778756	0	0	0	0	0	0	0	0	0	0	0	1	0	0	0	0	0	0	0	0	0	0	0	0	0	0	0	0	0	0	0	0	0	0	0	0	0	0
1.20174582.T_G.clim-gs4	1	20174582	T	G	0.0479042	INTERGENIC	clim-gs4	AT1G54040	promoter	20173449	20174949	0	0	0	0	0	0	0	0	0	0	0	0	0	0	0	0	0	0	0	0	0	0	0	0	0	0	0	0	0	0	0	0	0	0	0	0	0	0
1.20183496.A_G.clim-gs4	1	20183496	A	G	0.0479042	INTERGENIC	clim-gs4	AT1G54070	terminator	20183005	20184505	0	0	0	0	0	0	0	0	0	0	0	0	0	0	0	0	0	0	0	0	0	0	0	0	0	0	0	0	0	0	0	0	0	0	0	0	0	0
1.19861413.C_T.clim-gs4	1	19861413	C	T	0.0479042	STOP_GAINED	clim-gs4	AT1G53265	promoter	19860975	19862475	0	0	0	0	0	0	0	0	0	0	0	0	0	0	0	0	0	0	0	0	0	0	0	0	0	0	0	0	-1	0	0	0	0	0	0	0	0	0
1.20187240.C_G.clim-gs4	1	20187240	C	G	0.0479042	INTERGENIC	clim-gs4	AT1G54080	promoter	20186596	20188096	0	0	0	0	0	0	0	0	0	0	0	0	0	0	0	0	0	0	0	0	0	0	0	0	0	0	0	0	0	0	0	0	0	0	0	0	0	0
1.20191491.G_A.clim-gs4	1	20191491	G	A	0.0479042	SYNONYMOUS_CODING	clim-gs4	AT1G54090	terminator	20191400	20192900	0	0	0	0	0	0	0	0	0	0	0	0	0	0	0	0	0	0	0	0	0	0	0	0	0	0	0	0	0	0	0	0	0	0	0	0	0	0
1.20241304.C_A.clim-gs4	1	20241304	C	A	0.0479042	NON_SYNONYMOUS_CODING	clim-gs4	AT1G54210	promoter	20240225	20241725	0	0	0	0	0	0	0	0	0	0	0	0	0	0	0	0	0	0	0	0	0	0	0	0	0	0	0	0	0	0	0	0	0	0	0	0	0	0
1.20245887.A_C.clim-gs4	1	20245887	A	C	0.0479042	INTERGENIC	clim-gs4	AT1G54217	promoter	20245055	20246555	0	0	0	0	0	0	0	0	0	0	0	0	0	0	0	0	0	0	0	0	0	0	0	0	0	0	0	0	0	0	0	0	0	0	0	0	0	0
1.20157877.C_T.clim-gs4	1	20157877	C	T	0.0479042	INTERGENIC	clim-gs4	AT1G54010	terminator	20157588	20159088	0	0	0	0	0	0	0	0	0	0	0	0	0	0	0	0	0	0	0	0	0	0	0	0	0	0	0	0	0	0	0	0	0	0	0	0	0	0
1.20164136.A_T.clim-gs4	1	20164136	A	T	0.0479042	INTERGENIC	clim-gs4	AT1G54020	promoter	20163250	20164750	0	0	0	0	0	0	0	0	0	0	0	0	0	0	0	0	0	0	0	0	0	0	0	0	0	0	0	0	0	0	0	0	0	0	0	0	0	0
1.20208327.C_T.clim-gs4	1	20208327	C	T	0.0479042	INTERGENIC	clim-gs4	AT1G54120	terminator	20207055	20208555	0	0	0	0	0	0	0	0	0	0	0	0	0	0	0	0	0	0	0	0	0	0	0	0	0	0	0	0	0	0	0	0	0	0	0	0	0	0
1.20179434.T_C.clim-gs4	1	20179434	T	C	0.0479042	UTR_3_PRIME	clim-gs4	AT1G54050	terminator	20178356	20179856	0	0	0	0	0	0	0	0	0	0	0	0	0	0	0	0	0	0	0	0	0	0	0	0	0	0	0	0	0	0	0	0	0	0	0	0	0	0
1.20204341.T_A.clim-gs4	1	20204341	T	A	0.0479042	INTERGENIC	clim-gs4	AT1G54115	terminator	20203912	20205412	0	0	0	0	0	0	0	0	0	0	0	0	0	0	0	0	0	0	0	0	0	0	0	0	0	0	0	0	0	0	0	0	0	0	0	0	0	0
1.20215258.T_A.clim-gs4	1	20215258	T	A	0.0479042	INTERGENIC	clim-gs4	AT1G54150	promoter	20214394	20215894	0	0	0	0	0	0	0	0	0	0	0	0	0	0	0	0	0	0	0	0	0	0	0	0	0	0	0	0	0	0	0	0	0	0	0	0	0	0
1.20178918.G_A.clim-gs4	1	20178918	G	A	0.0479042	INTERGENIC	clim-gs4	AT1G54050	terminator	20178356	20179856	0	1	0	0	0	0	0	0	0	0	0	0	0	0	0	0	0	0	0	0	0	0	0	0	0	0	0	0	0	0	0	0	0	0	0	0	0	0
1.20180248.T_C.clim-gs4	1	20180248	T	C	0.0479042	UTR_5_PRIME	clim-gs4	AT1G54060	promoter	20179609	20181109	0	0	0	0	0	0	0	0	0	0	0	0	0	0	0	0	0	0	0	0	0	0	0	0	0	0	0	0	0	0	0	0	0	0	0	0	0	0
1.20187810.G_A.clim-gs4	1	20187810	G	A	0.0479042	INTERGENIC	clim-gs4	AT1G54080	promoter	20186596	20188096	0	0	0	0	0	0	0	0	0	0	0	0	0	0	0	0	0	0	0	0	0	0	0	0	0	0	0	0	0	0	0	0	0	0	0	0	0	0
1.20194439.G_A.clim-gs4	1	20194439	G	A	0.0479042	INTERGENIC	clim-gs4	AT1G54100	terminator	20193711	20195211	0	0	0	0	0	0	0	0	0	0	0	0	0	0	0	0	0	0	0	0	0	0	0	0	0	0	0	0	0	0	0	0	0	0	0	0	0	0
1.20215302.T_G.clim-gs4	1	20215302	T	G	0.0479042	INTERGENIC	clim-gs4	AT1G54150	promoter	20214394	20215894	0	0	0	0	0	0	0	0	0	0	0	0	0	0	0	0	0	0	0	0	0	0	0	0	0	-1	0	0	0	0	0	0	0	0	0	0	0	0
1.20221215.A_C.clim-gs4	1	20221215	A	C	0.0479042	UTR_3_PRIME	clim-gs4	AT1G54170	terminator	20220028	20221528	0	0	0	0	0	0	0	0	0	0	0	0	0	0	0	0	0	0	0	0	0	0	0	0	0	0	0	0	0	0	0	0	0	0	0	0	0	0
1.20226598.C_T.clim-gs4	1	20226598	C	T	0.0479042	INTERGENIC	clim-gs4	AT1G54180	promoter	20226167	20227667	0	0	0	0	0	0	0	0	0	0	-1	0	0	0	0	0	0	0	0	0	0	0	0	0	0	0	0	0	0	0	0	0	0	0	0	0	0	0
1.2809684.G_C.clim-bio4	1	2809684	G	C	0.0439122	UTR_3_PRIME	clim-bio4	AT1G08780	terminator	2808777	2810277	0	0	0	0	0	0	0	0	0	0	0	0	0	0	0	0	0	0	0	0	0	0	0	0	0	0	0	0	0	0	0	0	0	0	0	0	0	0
1.1224060.A_G.clim-tmax2	1	1224060	A	G	0.0139721	INTRON	clim-tmax2	AT1G04500	promoter	1224039	1225539	0	0	0	0	0	0	0	0	0	0	0	0	0	0	0	0	0	0	0	0	0	0	0	0	0	0	0	0	0	0	0	0	0	0	0	0	0	0
1.21691109.C_T.clim-aet12	1	21691109	C	T	0.0139721	SYNONYMOUS_CODING	clim-aet12	AT1G58390	terminator	21689641	21691141	0	0	0	0	0	0	0	0	0	0	0	0	0	0	0	0	0	0	1	0	0	0	0	0	0	0	0	0	0	0	0	0	0	0	0	0	0	0
1.3132281.A_G.clim-tmin2	1	3132281	A	G	0.0724346	INTERGENIC	clim-tmin2	AT1G09665	promoter	3132007	3133507	0	0	0	0	0	0	0	0	0	0	0	0	0	0	0	0	0	0	0	0	0	0	0	0	0	0	0	0	0	0	0	0	0	0	0	0	0	0
1.3132141.A_T.clim-tmin2	1	3132141	A	T	0.0724346	INTERGENIC	clim-tmin2	AT1G09665	promoter	3132007	3133507	0	0	0	0	0	0	0	0	0	0	0	0	0	0	0	0	0	0	0	0	0	0	0	0	0	0	0	0	0	0	0	0	0	0	0	0	0	0
1.8945206.C_A.clim-tmin2	1	8945206	C	A	0.0160966	NON_SYNONYMOUS_CODING	clim-tmin2	AT1G25460	terminator	8943942	8945442	0	0	0	0	0	0	0	0	0	0	0	0	0	0	0	0	0	0	0	0	0	0	0	0	0	0	0	0	0	0	0	0	0	0	0	0	0	0
1.8947898.C_G.clim-tmin2	1	8947898	C	G	0.0160966	INTERGENIC	clim-tmin2	AT1G25480	promoter	8947231	8948731	0	0	0	0	0	0	0	0	0	0	0	0	0	0	0	0	0	0	0	0	0	0	0	0	0	0	0	0	0	0	0	0	0	0	0	0	0	0
1.8955973.G_T.clim-tmin2	1	8955973	G	T	0.0160966	INTRON	clim-tmin2	AT1G25490	terminator	8954660	8956160	0	0	0	0	0	0	0	0	0	0	0	0	0	0	0	0	0	0	0	0	0	0	0	0	0	0	0	0	0	0	0	0	0	0	0	0	0	0
1.8951915.A_T.clim-tmin2	1	8951915	A	T	0.0160966	SYNONYMOUS_CODING	clim-tmin2	AT1G25480	terminator	8950531	8952031	0	0	0	0	0	0	0	0	0	0	0	0	0	0	0	0	0	0	0	0	0	0	0	0	0	0	0	0	0	0	0	0	0	0	0	0	0	0
1.17623947.G_A.clim-aet1	1	17623947	G	A	0.011976	.	clim-aet1	AT1G47845	promoter	17623774	17625274	0	0	0	0	0	0	0	0	0	0	0	0	0	0	0	0	0	0	0	0	0	0	0	0	0	0	0	0	0	0	0	0	0	1	0	0	0	0
1.20879229.G_A.clim-gs9	1	20879229	G	A	0.011976	NON_SYNONYMOUS_CODING	clim-gs9	AT1G55860	terminator	20878899	20880399	0	-1	0	0	0	0	0	0	0	0	0	0	0	0	0	0	0	0	0	0	0	0	0	0	0	0	0	0	0	0	0	0	0	0	0	0	0	0
1.12217683.A_T.clim-tmax2	1	12217683	A	T	0.0279441	INTERGENIC	clim-tmax2	AT1G06697	terminator	12216891	12218391	0	0	0	0	0	0	0	0	0	0	0	0	0	0	0	0	0	0	0	0	0	0	0	0	0	0	0	0	0	0	0	0	0	0	0	0	0	0
1.5357585.A_T.clim-gs tmax	1	5357585	A	T	0.0159681	INTERGENIC	clim-gs tmax	AT1G05173	terminator	5356087	5357587	0	0	0	0	0	0	0	0	0	0	0	0	0	0	0	0	0	0	0	0	0	0	0	0	0	0	0	0	0	0	0	0	0	0	0	0	0	0
1.12283052.G_A.clim-aet5	1	12283052	G	A	0.0159681	INTERGENIC	clim-aet5	AT1G33840	terminator	12282724	12284224	0	0	0	0	0	0	0	0	0	0	0	0	0	0	0	0	0	0	0	0	0	0	0	0	0	0	0	0	0	0	0	0	0	0	0	0	0	0
1.12285313.C_A.clim-aet5	1	12285313	C	A	0.0159681	INTERGENIC	clim-aet5	AT1G33840	promoter	12284871	12286371	0	0	0	0	0	0	0	0	0	0	0	0	0	0	0	0	0	0	0	0	0	0	0	0	0	0	0	0	0	0	0	0	0	0	0	0	0	0
1.12297451.C_G.clim-aet5	1	12297451	C	G	0.0159681	INTERGENIC	clim-aet5	AT1G06713	promoter	12297025	12298525	0	0	0	0	0	0	0	0	0	0	0	0	0	0	0	0	0	0	0	0	0	0	0	0	0	0	0	0	0	0	0	0	0	0	0	0	0	0
1.12293722.G_A.clim-aet5	1	12293722	G	A	0.0159681	INTERGENIC	clim-aet5	AT1G33860	promoter	12293393	12294893	0	0	0	0	0	0	0	0	0	0	0	0	0	0	0	0	0	0	0	0	0	0	0	0	0	0	0	0	0	0	0	0	0	0	0	0	0	0
1.12305497.A_G.clim-aet5	1	12305497	A	G	0.0159681	INTERGENIC	clim-aet5	AT1G33880	promoter	12304703	12306203	0	0	0	0	0	0	0	0	0	0	0	0	0	0	0	0	0	0	0	0	0	0	0	0	0	0	0	0	0	0	0	0	0	0	0	0	0	0
1.12297432.C_A.clim-aet5	1	12297432	C	A	0.0159681	INTERGENIC	clim-aet5	AT1G06713	promoter	12297025	12298525	0	0	0	0	0	0	0	0	0	0	-1	0	0	0	0	0	0	0	0	0	0	1	0	0	0	0	0	0	0	0	0	0	0	0	0	0	0	0
1.3209159.G_A.clim-aet5	1	3209159	G	A	0.0339321	INTRON	clim-aet5	AT1G09870	terminator	3208214	3209714	0	0	0	0	0	0	0	0	0	0	0	0	0	0	0	0	0	0	0	0	0	0	0	0	0	-1	0	0	0	0	0	0	0	0	0	0	0	0
1.3209477.A_G.clim-aet5	1	3209477	A	G	0.0339321	SYNONYMOUS_CODING	clim-aet5	AT1G09870	terminator	3208214	3209714	0	0	0	0	0	0	0	0	0	0	0	0	0	0	0	0	0	0	0	0	0	0	0	0	0	0	0	0	0	0	0	0	0	0	0	0	0	0
1.3207754.G_A.clim-aet5	1	3207754	G	A	0.0339321	INTRON	clim-aet5	AT1G09880	terminator	3207711	3209211	0	0	0	0	0	0	0	0	0	0	0	0	0	0	0	0	0	0	0	0	0	0	0	0	0	0	0	0	0	0	0	0	0	0	0	0	0	0
1.3223866.T_C.clim-aet5	1	3223866	T	C	0.0339321	INTRON	clim-aet5	AT1G09920	terminator	3223683	3225183	0	0	0	0	0	0	0	0	0	0	0	0	0	0	0	0	0	0	0	0	0	0	0	0	0	0	0	0	0	0	0	0	0	0	0	0	0	0
1.3230933.C_A.clim-aet5	1	3230933	C	A	0.0339321	INTRON	clim-aet5	AT1G09932	terminator	3229449	3230949	0	0	0	0	0	0	0	0	0	0	0	0	0	0	0	0	0	0	0	0	0	0	0	0	0	0	0	0	0	0	0	0	0	0	0	0	0	0
1.3230847.A_C.clim-aet5	1	3230847	A	C	0.0339321	INTRON	clim-aet5	AT1G09932	terminator	3229449	3230949	0	0	0	0	0	0	0	0	0	0	0	0	0	0	0	0	0	0	0	0	0	0	0	0	0	0	0	-1	0	0	0	0	0	0	0	0	0	0
1.29520075.A_G.clim-bio4	1	29520075	A	G	0.0399202	INTERGENIC	clim-bio4	AT1G78460	promoter	29518823	29520323	0	0	0	0	0	0	0	0	0	0	0	0	0	0	0	0	0	0	0	0	0	0	0	0	0	0	0	0	0	0	0	0	0	0	0	0	0	0
1.29530978.G_A.clim-bio4	1	29530978	G	A	0.0399202	INTERGENIC	clim-bio4	AT1G78500	promoter	29530466	29531966	0	0	0	0	0	0	0	0	0	0	0	0	0	0	0	0	0	0	0	0	0	0	0	0	0	0	0	0	0	0	0	0	0	0	0	0	0	0
1.29526167.G_T.clim-bio4	1	29526167	G	T	0.0399202	NON_SYNONYMOUS_CODING	clim-bio4	AT1G78476	terminator	29525784	29527284	0	0	0	0	0	0	0	0	0	0	0	0	0	0	0	0	0	0	0	0	0	0	0	0	0	0	0	0	0	0	0	0	0	0	0	0	0	0
1.871705.T_A.clim-tmax1	1	871705	T	A	0.0139721	INTERGENIC	clim-tmax1	AT1G03490	promoter	870873	872373	0	0	0	0	0	0	0	0	0	0	0	0	0	0	0	0	0	0	0	0	0	0	0	0	0	0	0	0	0	0	0	0	0	0	0	0	0	0
1.880201.C_T.clim-tmax1	1	880201	C	T	0.0139721	INTERGENIC	clim-tmax1	AT1G03520	promoter	879759	881259	0	0	0	0	0	0	0	0	0	0	0	0	0	0	0	0	0	0	0	0	0	0	0	0	0	0	0	0	0	0	0	0	0	0	0	0	0	0
1.920661.T_G.clim-tmax1	1	920661	T	G	0.0139721	INTERGENIC	clim-tmax1	AT1G03687	terminator	920092	921592	0	0	0	0	0	0	0	0	0	0	0	0	0	0	0	0	0	0	0	0	0	0	0	0	0	0	0	0	0	0	0	0	0	0	0	0	0	0
1.864743.A_G.clim-tmax1	1	864743	A	G	0.0139721	INTERGENIC	clim-tmax1	AT1G03457	promoter	863872	865372	0	0	0	0	0	0	0	0	0	0	0	0	0	0	0	0	0	0	0	0	0	0	0	0	0	0	0	0	0	0	0	0	0	0	0	0	0	0
1.865918.C_T.clim-tmax1	1	865918	C	T	0.0139721	UTR_3_PRIME	clim-tmax1	AT1G03470	terminator	864894	866394	0	0	0	0	0	0	0	0	0	0	0	0	0	0	0	0	0	0	0	0	0	0	0	0	0	0	0	0	0	0	0	0	0	0	0	0	0	0
1.883788.C_A.clim-tmax1	1	883788	C	A	0.0139721	NON_SYNONYMOUS_CODING	clim-tmax1	AT1G03540	promoter	882682	884182	0	0	0	0	0	0	0	0	0	0	0	0	0	0	0	0	0	0	0	0	0	0	0	0	0	0	0	0	0	0	0	0	0	0	0	0	0	0
1.916754.C_A.clim-tmax1	1	916754	C	A	0.0139721	INTERGENIC	clim-tmax1	AT1G03670	promoter	915722	917222	0	0	0	0	0	0	0	0	0	0	0	0	0	0	0	0	0	0	0	0	0	0	0	0	0	0	0	0	0	0	0	0	0	0	0	0	0	0
1.860303.C_G.clim-tmax1	1	860303	C	G	0.0139721	INTERGENIC	clim-tmax1	AT1G03445	promoter	859201	860701	0	0	0	0	0	0	0	0	0	0	0	0	0	0	0	0	0	0	0	0	0	0	0	0	0	0	0	0	0	0	0	0	0	0	0	0	0	0
1.875936.C_T.clim-tmax1	1	875936	C	T	0.0139721	INTERGENIC	clim-tmax1	AT1G03510	terminator	875086	876586	0	-1	0	0	0	0	0	0	0	0	0	0	0	0	0	0	0	0	0	0	0	0	0	0	0	0	0	0	-1	1	0	0	0	0	0	0	0	0
1.912641.G_A.clim-tmax1	1	912641	G	A	0.0139721	INTERGENIC	clim-tmax1	AT1G04203	promoter	912389	913889	0	0	0	0	0	0	0	0	0	0	0	0	0	0	0	0	0	0	0	0	0	0	0	0	0	0	0	0	0	0	0	0	0	0	0	0	0	0
1.916314.G_C.clim-tmax1	1	916314	G	C	0.0139721	INTERGENIC	clim-tmax1	AT1G03670	promoter	915722	917222	0	0	0	0	0	0	0	0	0	0	0	0	0	0	0	0	0	0	0	0	0	0	0	0	0	0	0	0	0	0	0	0	0	0	0	0	0	0
1.860451.A_G.clim-tmax1	1	860451	A	G	0.0139721	INTERGENIC	clim-tmax1	AT1G03445	promoter	859201	860701	0	0	0	0	0	0	0	0	0	0	0	0	0	0	0	0	0	0	0	0	0	0	0	0	0	0	0	0	0	0	0	0	0	0	0	0	0	0
1.875844.C_A.clim-tmax1	1	875844	C	A	0.0139721	INTERGENIC	clim-tmax1	AT1G03510	terminator	875086	876586	0	0	0	0	0	0	0	0	0	0	0	0	0	0	0	0	0	0	0	0	0	0	0	0	0	0	0	0	0	0	0	0	0	0	0	0	0	0
1.903784.T_G.clim-tmax1	1	903784	T	G	0.0139721	INTERGENIC	clim-tmax1	AT1G03620	terminator	903031	904531	0	0	0	0	0	0	0	0	0	0	0	0	0	0	0	0	0	0	0	0	0	0	0	0	0	0	0	0	0	0	0	0	0	0	0	0	0	0
1.864563.A_T.clim-tmax1	1	864563	A	T	0.0139721	INTERGENIC	clim-tmax1	AT1G03457	promoter	863872	865372	0	0	-1	0	0	0	0	0	0	1	0	0	0	0	0	0	0	0	0	0	0	0	0	0	0	0	0	0	0	0	0	0	0	-1	0	0	0	0
1.872622.C_A.clim-tmax1	1	872622	C	A	0.0139721	NON_SYNONYMOUS_CODING	clim-tmax1	AT1G03490	terminator	872406	873906	0	0	0	0	0	0	0	0	0	0	0	0	0	0	0	0	0	0	0	0	0	0	0	0	0	0	0	0	0	0	0	0	0	0	0	0	0	0
1.873690.T_C.clim-tmax1	1	873690	T	C	0.0139721	.	clim-tmax1	AT1G03490	terminator	872406	873906	0	0	0	0	0	0	0	0	0	0	0	0	0	0	0	0	0	0	0	0	0	0	0	0	0	0	0	0	0	0	0	0	0	0	0	0	0	0
1.878669.C_T.clim-tmax1	1	878669	C	T	0.0139721	INTRON	clim-tmax1	AT1G03515	terminator	877219	878719	0	0	0	0	0	0	0	0	0	0	-1	0	0	0	0	0	0	0	1	0	0	0	0	0	0	0	0	0	0	0	0	0	0	0	0	0	0	0
1.6848384.G_A.clim-gs tmax	1	6848384	G	A	0.0159681	INTRAGENIC	clim-gs tmax	AT1G19800	terminator	6847628	6849128	0	0	0	0	0	0	0	0	0	0	0	0	0	0	0	0	0	0	0	0	0	0	0	0	0	0	0	0	0	0	0	0	0	0	0	0	0	0
1.16131967.C_T.clim-bio4	1	16131967	C	T	0.0698603	INTERGENIC	clim-bio4	AT1G07143	promoter	16130686	16132186	0	0	0	0	0	0	0	0	0	0	0	0	0	0	0	0	0	0	0	0	0	0	0	0	0	0	0	0	0	0	0	0	0	0	0	0	0	0
1.16132015.A_T.clim-bio4	1	16132015	A	T	0.0698603	INTERGENIC	clim-bio4	AT1G07143	promoter	16130686	16132186	0	0	0	0	0	0	0	0	0	0	0	0	0	0	-1	0	0	0	0	0	0	0	0	0	0	0	0	0	0	0	0	0	0	0	0	0	0	0
1.2770177.G_A.clim-bio4	1	2770177	G	A	0.0459082	NON_SYNONYMOUS_CODING	clim-bio4	AT1G08695	promoter	2769008	2770508	0	0	0	0	0	0	0	0	0	0	0	0	0	0	0	0	0	0	0	0	0	0	0	0	0	0	0	0	0	0	0	0	0	0	0	0	0	0
1.2774240.C_T.clim-bio4	1	2774240	C	T	0.0459082	NON_SYNONYMOUS_CODING	clim-bio4	AT1G08710	terminator	2773031	2774531	0	0	0	0	0	0	0	0	0	0	0	0	0	0	0	0	0	0	0	0	0	0	0	0	0	0	0	0	0	0	0	0	0	0	0	0	0	0
1.2861190.C_A.clim-tmin2	1	2861190	C	A	0.0663984	INTERGENIC	clim-tmin2	AT1G08910	terminator	2860670	2862170	0	0	0	0	0	0	0	0	0	0	0	0	0	0	0	0	0	0	0	0	0	0	0	0	0	0	0	0	0	0	0	0	0	0	0	0	0	0
1.25430982.T_A.clim-gs tmax	1	25430982	T	A	0.011976	NON_SYNONYMOUS_CODING	clim-gs tmax	AT1G67830	terminator	25430548	25432048	0	0	0	0	0	0	0	0	0	0	0	0	0	0	0	0	0	0	0	0	0	0	0	0	0	0	0	0	0	0	0	0	0	0	0	0	0	0
1.25441677.C_A.clim-gs tmax	1	25441677	C	A	0.011976	INTRON	clim-gs tmax	AT1G67856	promoter	25441403	25442903	0	0	0	0	0	0	0	0	0	0	0	0	0	0	0	0	0	0	0	0	0	0	0	0	0	0	0	0	0	0	0	0	0	0	0	0	0	0
1.25417304.C_T.clim-gs tmax	1	25417304	C	T	0.011976	INTERGENIC	clim-gs tmax	AT1G67790	terminator	25416541	25418041	0	0	0	0	0	0	0	0	0	0	0	0	0	0	0	0	0	0	0	0	0	0	0	0	0	0	0	0	0	0	0	0	0	0	0	0	0	0
1.25442658.C_T.clim-gs tmax	1	25442658	C	T	0.011976	NON_SYNONYMOUS_CODING	clim-gs tmax	AT1G67850	terminator	25441721	25443221	0	0	0	0	0	0	0	0	0	0	0	0	0	0	0	0	0	0	0	0	0	0	0	0	0	0	0	0	0	0	0	0	0	0	0	0	0	0
1.25453020.C_T.clim-gs tmax	1	25453020	C	T	0.011976	INTERGENIC	clim-gs tmax	AT1G67880	terminator	25452822	25454322	0	0	0	0	0	0	0	0	0	0	0	0	0	0	0	0	0	0	0	0	0	0	1	0	0	0	0	0	0	0	0	0	0	0	0	0	0	0
1.25457341.C_T.clim-gs tmax	1	25457341	C	T	0.011976	UTR_5_PRIME	clim-gs tmax	AT1G67890	promoter	25456032	25457532	0	0	0	0	0	0	0	0	0	0	1	0	0	0	0	0	0	0	0	0	0	0	0	0	0	0	0	0	0	0	0	0	0	0	0	0	0	0
1.25393676.C_A.clim-gs tmax	1	25393676	C	A	0.011976	INTERGENIC	clim-gs tmax	AT1G67730	terminator	25393389	25394889	0	0	0	0	0	0	0	0	0	0	0	0	0	0	0	0	0	0	0	0	0	0	0	0	0	0	0	0	0	0	0	0	0	0	0	0	0	0
1.25416673.G_A.clim-gs tmax	1	25416673	G	A	0.011976	INTRON	clim-gs tmax	AT1G67780	terminator	25415297	25416797	0	0	0	0	0	0	0	0	0	0	0	0	0	0	0	0	0	0	1	0	0	0	0	0	0	0	0	0	0	0	0	0	0	0	0	0	0	0
1.25431409.G_A.clim-gs tmax	1	25431409	G	A	0.011976	SYNONYMOUS_CODING	clim-gs tmax	AT1G67830	terminator	25430548	25432048	0	0	0	0	0	0	0	0	0	0	0	0	0	0	0	0	0	0	0	0	0	0	0	0	0	0	0	0	0	0	0	0	0	0	0	0	0	0
1.25456316.G_A.clim-gs tmax	1	25456316	G	A	0.011976	INTERGENIC	clim-gs tmax	AT1G67890	promoter	25456032	25457532	0	0	0	0	0	0	0	0	0	0	0	0	0	0	0	0	0	0	0	0	0	0	0	0	0	0	0	0	0	0	0	0	0	0	0	0	0	0
1.8936240.A_G.clim-tmin2	1	8936240	A	G	0.0181087	INTERGENIC	clim-tmin2	AT1G25440	promoter	8935044	8936544	0	0	0	0	0	0	0	0	0	0	0	0	0	0	0	0	0	0	0	0	0	0	0	0	0	0	0	0	0	0	0	0	0	0	0	0	0	0
1.3220407.A_T.clim-gs tmax	1	3220407	A	T	0.0199601	INTRON	clim-gs tmax	AT1G09900	terminator	3219429	3220929	0	0	0	0	0	0	0	0	0	0	0	0	0	0	0	0	0	0	0	0	0	0	0	0	0	0	0	0	0	0	0	0	0	0	0	0	0	0
1.3217840.C_G.clim-gs tmax	1	3217840	C	G	0.0199601	INTERGENIC	clim-gs tmax	AT1G09900	promoter	3217132	3218632	0	0	0	0	0	0	0	0	0	0	0	0	0	0	0	0	0	0	0	0	0	0	0	0	0	0	0	0	0	0	0	0	0	0	0	0	0	0
1.3223905.T_G.clim-gs tmax	1	3223905	T	G	0.0199601	INTRON	clim-gs tmax	AT1G09920	terminator	3223683	3225183	0	0	0	0	0	0	0	0	0	0	0	0	0	0	0	0	0	0	0	0	0	0	0	0	0	0	0	0	0	0	0	0	0	0	0	0	0	0
1.16452010.G_A.clim-aet12	1	16452010	G	A	0.0139721	INTERGENIC	clim-aet12	AT1G43665	terminator	16451980	16453480	0	0	0	0	0	0	0	0	0	0	0	0	0	0	0	0	0	0	0	0	0	0	0	0	0	0	0	0	0	0	0	0	0	0	0	0	0	0
1.1191330.A_C.clim-tmax2	1	1191330	A	C	0.0239521	UTR_5_PRIME	clim-tmax2	AT1G04410	promoter	1190958	1192458	0	0	0	0	0	0	0	0	0	0	0	0	0	0	0	0	0	0	0	0	0	0	0	0	0	0	0	0	0	0	0	0	0	0	0	0	0	0
1.1543110.A_T.clim-tmax1	1	1543110	A	T	0.0199601	INTERGENIC	clim-tmax1	AT1G05291	promoter	1541932	1543432	0	0	0	0	0	0	0	0	0	0	0	0	0	0	0	0	0	0	0	0	0	0	0	0	0	0	0	0	0	0	0	0	0	0	0	0	0	0
1.23393660.T_C.rosetteDM	1	23393660	T	C	0.0261905	INTERGENIC	rosetteDM	AT1G63090	promoter	23392373	23393873	0	0	0	0	0	0	0	0	0	0	0	0	0	0	0	0	0	0	0	0	0	0	0	0	0	0	0	0	0	0	0	0	0	0	0	0	0	0
1.7490462.C_T.clim-tmax12	1	7490462	C	T	0.0139721	SYNONYMOUS_CODING	clim-tmax12	AT1G21390	promoter	7490303	7491803	0	0	0	0	0	0	0	0	0	0	0	0	0	0	0	0	0	0	0	0	0	0	0	0	0	0	0	-1	0	0	0	0	0	0	0	0	0	0
1.7485649.A_T.clim-tmax12	1	7485649	A	T	0.0139721	UTR_3_PRIME	clim-tmax12	AT1G21370	terminator	7485166	7486666	0	0	0	0	0	0	0	0	0	0	0	0	0	0	0	0	0	0	0	0	0	0	0	0	0	0	0	0	0	0	0	0	0	0	0	0	0	0
1.7490797.T_A.clim-tmax12	1	7490797	T	A	0.0139721	INTERGENIC	clim-tmax12	AT1G21390	promoter	7490303	7491803	0	0	0	0	0	0	0	0	0	0	0	0	0	0	0	0	0	0	0	0	0	0	0	0	0	0	0	0	0	0	0	0	0	0	0	0	0	0
1.8379552.G_T.clim-tmax12	1	8379552	G	T	0.0199601	INTRON	clim-tmax12	AT1G23690	promoter	8378269	8379769	0	0	0	0	0	0	0	0	0	0	0	0	0	0	0	0	0	0	0	0	0	0	0	0	0	0	0	0	0	0	0	0	0	0	0	0	0	0
1.8378553.G_T.clim-tmax12	1	8378553	G	T	0.0199601	INTRON	clim-tmax12	AT1G23690	promoter	8378269	8379769	0	0	0	0	0	0	0	0	0	0	0	0	0	0	0	0	0	0	0	0	0	0	0	0	0	0	0	0	0	0	0	0	0	0	0	0	0	0
1.8379391.G_T.clim-tmax12	1	8379391	G	T	0.0199601	INTERGENIC	clim-tmax12	AT1G23690	promoter	8378269	8379769	0	0	0	0	0	0	0	0	0	0	0	0	0	0	0	0	0	0	0	0	0	0	0	0	0	0	0	0	0	0	0	0	0	0	0	0	0	0
1.8382014.C_T.clim-tmax12	1	8382014	C	T	0.0199601	INTERGENIC	clim-tmax12	AT1G23700	promoter	8381790	8383290	0	0	0	0	0	0	0	0	0	0	0	0	0	0	0	0	0	0	0	0	0	0	0	0	0	0	0	0	0	0	0	0	0	0	0	0	0	0
1.3473261.G_C.clim-tmax2	1	3473261	G	C	0.0139721	INTERGENIC	clim-tmax2	AT1G10530	promoter	3472174	3473674	0	0	0	0	0	0	0	0	0	0	0	0	0	0	0	0	0	0	0	0	0	0	0	0	0	0	0	-1	1	-1	0	0	0	0	0	0	0	0
1.3594976.T_A.clim-tmax2	1	3594976	T	A	0.0139721	INTRON	clim-tmax2	AT1G10780	promoter	3594720	3596220	0	0	0	0	0	0	0	0	0	0	0	0	0	0	0	1	0	0	0	0	0	0	0	0	0	0	0	0	0	0	0	0	0	0	0	0	0	0
1.3459927.A_G.clim-tmax2	1	3459927	A	G	0.0139721	UTR_3_PRIME	clim-tmax2	AT1G10500	terminator	3458999	3460499	0	0	0	0	0	0	0	0	0	0	0	0	0	0	0	0	0	0	0	0	0	0	0	0	0	0	0	0	0	0	0	0	0	0	0	0	0	0
1.3469562.C_T.clim-tmax2	1	3469562	C	T	0.0139721	INTERGENIC	clim-tmax2	AT1G10522	promoter	3468511	3470011	0	0	0	0	0	0	0	0	0	0	0	0	0	0	0	0	0	0	0	0	0	0	0	0	0	0	0	0	0	0	0	0	0	0	0	0	0	0
1.3479379.C_T.clim-tmax2	1	3479379	C	T	0.0139721	NON_SYNONYMOUS_CODING	clim-tmax2	AT1G10550	terminator	3478065	3479565	0	0	0	0	0	0	0	0	0	0	0	0	0	0	0	0	0	0	0	0	0	0	0	0	0	0	0	0	0	0	0	0	0	0	0	0	0	0
1.3481240.A_T.clim-tmax2	1	3481240	A	T	0.0139721	INTERGENIC	clim-tmax2	AT1G10550	promoter	3480541	3482041	0	0	0	0	0	0	0	0	0	0	0	0	0	0	0	0	0	0	0	0	0	0	0	0	0	0	0	0	0	0	0	0	0	0	0	0	0	0
1.1522727.T_C.clim-tmin6	1	1522727	T	C	0.011976	INTERGENIC	clim-tmin6	AT1G05240	terminator	1522523	1524023	0	0	0	0	0	0	0	0	0	0	0	0	0	0	0	0	0	0	0	0	0	0	0	0	0	0	0	0	0	0	0	0	0	0	0	0	0	0
1.4270574.G_A.clim-bio4	1	4270574	G	A	0.0259481	INTRON	clim-bio4	AT1G12530	promoter	4270407	4271907	0	0	0	0	0	0	0	0	0	0	0	0	0	0	0	0	0	0	0	0	0	0	0	0	0	0	0	0	0	0	0	0	0	0	0	0	0	0
1.19490651.C_T.clim-gs9	1	19490651	C	T	0.0159681	SYNONYMOUS_CODING	clim-gs9	AT1G52330	terminator	19489414	19490914	0	0	0	0	0	0	0	0	0	0	0	0	0	0	0	0	0	0	0	0	0	0	0	0	0	-1	0	0	0	0	0	0	0	0	0	0	0	0
1.19493988.G_A.clim-gs9	1	19493988	G	A	0.0159681	INTERGENIC	clim-gs9	AT1G52343	terminator	19493126	19494626	0	0	0	0	0	0	0	0	0	0	0	0	0	0	0	0	0	0	0	0	0	0	0	0	0	0	0	0	0	0	0	0	0	0	0	0	0	0
1.19494560.C_A.clim-gs9	1	19494560	C	A	0.0159681	NON_SYNONYMOUS_CODING	clim-gs9	AT1G52343	terminator	19493126	19494626	0	0	0	0	0	0	0	0	0	0	0	0	0	0	0	0	0	0	0	0	0	0	0	0	0	0	0	0	0	0	0	0	0	0	0	0	0	0
1.19514260.A_G.clim-gs9	1	19514260	A	G	0.0159681	INTERGENIC	clim-gs9	AT1G52400	promoter	19513988	19515488	0	0	0	0	0	0	0	0	0	0	0	0	0	0	0	0	0	0	0	0	0	0	0	0	0	0	0	0	0	0	0	0	0	0	0	0	0	0
1.19492317.G_A.clim-gs9	1	19492317	G	A	0.0159681	UTR_3_PRIME	clim-gs9	AT1G52340	promoter	19491150	19492650	0	0	0	0	0	0	0	0	0	0	0	0	0	0	0	0	0	0	0	0	0	0	0	0	0	0	0	0	0	0	0	0	0	0	0	0	0	0
1.19514521.G_A.clim-gs9	1	19514521	G	A	0.0159681	INTERGENIC	clim-gs9	AT1G52400	promoter	19513988	19515488	0	0	0	0	0	0	0	0	0	0	0	0	0	0	0	0	0	0	0	0	0	0	0	0	0	0	0	0	0	0	0	0	0	0	0	0	0	0
1.27590217.G_A.clim-tmax10	1	27590217	G	A	0.0139721	NON_SYNONYMOUS_CODING	clim-tmax10	AT1G73390	terminator	27589809	27591309	0	0	0	0	0	0	0	0	0	0	0	0	0	0	0	0	0	0	0	0	0	0	0	0	0	0	0	0	0	0	0	0	0	0	0	0	0	0
1.24702997.T_A.clim-gs tmax	1	24702997	T	A	0.011976	UTR_5_PRIME	clim-gs tmax	AT1G66270	promoter	24702666	24704166	0	0	0	0	0	0	0	0	0	0	0	0	0	0	0	0	0	0	0	0	0	-1	0	0	-1	0	0	0	0	0	0	0	0	0	0	0	0	0
1.24722934.A_G.clim-gs tmax	1	24722934	A	G	0.011976	INTERGENIC	clim-gs tmax	AT1G66310	terminator	24721970	24723470	0	0	0	0	0	0	0	0	0	0	0	0	0	0	0	0	0	0	0	0	0	0	0	0	0	0	0	-1	0	0	0	0	0	0	0	0	0	0
1.8937508.C_G.clim-tmin2	1	8937508	C	G	0.0201207	INTERGENIC	clim-tmin2	AT1G25450	terminator	8937386	8938886	0	0	0	0	0	0	0	0	0	0	0	0	0	0	0	0	0	0	0	0	0	0	0	0	0	0	0	0	0	0	0	0	0	0	0	0	0	0
1.1543645.T_C.clim-tmax1	1	1543645	T	C	0.0359281	INTERGENIC	clim-tmax1	AT1G04377	promoter	1542787	1544287	0	0	0	0	0	0	0	0	0	0	0	0	0	0	0	0	0	0	0	0	0	0	0	0	0	0	0	0	0	0	0	0	0	0	0	0	0	0
1.8940319.G_A.clim-tmin2	1	8940319	G	A	0.0181087	UTR_5_PRIME	clim-tmin2	AT1G25450	promoter	8940113	8941613	0	0	0	0	0	0	0	0	0	0	0	0	0	0	0	0	0	0	0	0	0	0	0	0	0	0	0	0	0	0	0	0	0	0	0	0	0	0
1.3904492.C_T.clim-tmax2	1	3904492	C	T	0.0139721	INTERGENIC	clim-tmax2	AT1G11600	terminator	3903395	3904895	0	0	0	0	0	0	0	0	0	0	0	0	0	0	0	0	0	0	0	0	0	0	0	0	0	0	0	0	0	0	0	0	0	0	0	0	0	0
1.24507972.C_T.clim-bio9	1	24507972	C	T	0.014	INTERGENIC	clim-bio9	AT1G65880	terminator	24507481	24508981	0	0	0	0	0	0	0	0	0	0	0	0	0	0	0	0	0	0	0	0	0	0	0	0	0	0	0	0	0	0	0	0	0	0	0	0	0	0
1.6812966.C_T.clim-gs tmax	1	6812966	C	T	0.0179641	INTERGENIC	clim-gs tmax	AT1G19700	promoter	6812563	6814063	0	0	0	0	0	0	0	0	0	0	0	0	0	0	0	0	0	0	0	0	0	0	0	0	0	0	0	0	0	0	0	0	0	0	0	0	0	0
1.6816890.G_C.clim-gs tmax	1	6816890	G	C	0.0179641	UTR_3_PRIME	clim-gs tmax	AT1G19710	terminator	6816376	6817876	0	1	0	0	0	0	0	0	0	0	0	0	0	0	0	0	0	0	0	0	0	0	0	0	0	0	0	0	0	0	0	0	0	0	0	0	0	0
1.6812965.A_T.clim-gs tmax	1	6812965	A	T	0.0179641	INTERGENIC	clim-gs tmax	AT1G19700	promoter	6812563	6814063	0	0	0	0	0	0	0	0	0	0	0	0	0	0	0	0	0	0	0	0	0	0	0	0	0	0	0	0	0	0	0	0	0	0	0	0	0	0
1.6847699.A_T.clim-gs tmax	1	6847699	A	T	0.0179641	SYNONYMOUS_CODING	clim-gs tmax	AT1G19800	terminator	6847628	6849128	0	0	0	0	0	0	0	0	0	0	0	0	0	0	0	0	0	0	0	0	0	0	0	0	0	0	0	0	0	0	0	0	0	0	0	0	0	0
1.6809423.G_T.clim-gs tmax	1	6809423	G	T	0.0179641	NON_SYNONYMOUS_CODING	clim-gs tmax	AT1G19690	promoter	6809142	6810642	0	0	0	0	0	0	0	0	0	0	0	0	0	0	0	0	0	0	0	0	0	0	0	0	0	0	0	0	0	0	0	0	0	0	0	0	0	0
1.1576909.T_C.clim-tmax1	1	1576909	T	C	0.0219561	UTR_5_PRIME	clim-tmax1	AT1G05380	promoter	1575821	1577321	0	0	0	0	0	0	0	0	0	0	0	0	0	0	0	0	0	0	0	0	0	0	0	0	0	0	0	0	0	0	0	0	0	0	0	0	0	0
1.12421565.G_A.clim-aet5	1	12421565	G	A	0.0179641	INTERGENIC	clim-aet5	AT1G34110	promoter	12421292	12422792	0	0	0	0	0	0	0	0	0	0	0	0	0	0	0	0	0	0	0	0	0	0	0	0	0	0	0	0	0	0	0	0	0	0	0	0	0	0
1.13340569.G_T.clim-aet5	1	13340569	G	T	0.0179641	INTRON	clim-aet5	AT1G35890	promoter	13340299	13341799	0	0	0	0	0	0	0	0	0	0	0	0	0	0	0	0	0	0	0	0	0	0	0	0	0	0	0	0	0	0	0	0	0	0	0	0	0	0
1.29459475.G_C.clim-tmin3	1	29459475	G	C	0.0311203	INTERGENIC	clim-tmin3	AT1G78290	promoter	29458993	29460493	0	0	0	0	0	0	0	0	0	0	0	0	0	0	0	0	0	0	0	0	0	0	0	0	0	0	0	0	0	0	0	0	0	0	0	0	0	0
1.21472831.T_A.clim-tmax2	1	21472831	T	A	0.0538922	INTERGENIC	clim-tmax2	AT1G58037	terminator	21471553	21473053	0	0	0	0	0	0	0	0	0	1	0	0	0	0	0	0	0	0	0	0	0	0	0	0	0	0	0	0	0	0	0	0	0	0	0	0	0	0
1.6812900.T_A.clim-gs tmax	1	6812900	T	A	0.0199601	INTERGENIC	clim-gs tmax	AT1G19700	promoter	6812563	6814063	0	0	0	0	0	0	0	0	0	0	0	0	0	0	0	0	0	0	0	0	0	0	0	0	0	0	0	0	0	0	0	0	0	0	0	0	0	0
1.4151260.A_G.avrPphB	1	4151260	A	G	0.288889	INTERGENIC	avrPphB	AT1G12230	terminator	4150556	4152056	0	0	0	0	0	0	0	0	0	0	0	0	0	0	0	0	0	0	0	0	0	0	0	0	0	0	0	0	0	0	0	0	0	0	0	0	0	0
1.4151410.T_A.avrPphB	1	4151410	T	A	0.288889	INTERGENIC	avrPphB	AT1G12230	terminator	4150556	4152056	0	0	0	0	0	0	0	0	0	0	0	0	0	0	0	0	0	0	0	0	0	0	0	0	0	0	0	0	0	0	0	0	0	0	0	0	0	0
1.4151415.C_T.avrPphB	1	4151415	C	T	0.288889	INTERGENIC	avrPphB	AT1G12230	terminator	4150556	4152056	0	0	-1	0	0	0	0	0	0	0	0	0	0	0	0	0	0	0	0	0	0	0	0	0	0	0	0	0	0	0	0	0	0	0	0	0	0	0
1.4151419.T_A.avrPphB	1	4151419	T	A	0.288889	INTERGENIC	avrPphB	AT1G12230	terminator	4150556	4152056	0	0	0	0	0	0	0	0	0	0	0	0	0	0	0	0	0	0	0	0	0	0	0	0	0	0	0	0	0	0	0	0	0	0	0	0	0	0
1.4150884.A_T.avrPphB	1	4150884	A	T	0.288889	UTR_3_PRIME	avrPphB	AT1G12230	terminator	4150556	4152056	0	0	0	0	0	0	0	0	0	0	0	0	0	0	0	0	0	0	0	0	0	0	0	0	0	0	0	0	0	0	0	0	0	0	0	0	0	0
1.4151027.A_C.avrPphB	1	4151027	A	C	0.288889	UTR_3_PRIME	avrPphB	AT1G12230	terminator	4150556	4152056	0	0	0	0	0	0	0	0	0	0	1	0	0	0	0	0	0	0	0	0	0	0	0	0	0	0	0	0	0	0	0	0	0	0	0	0	0	0
1.4151035.C_T.avrPphB	1	4151035	C	T	0.288889	UTR_3_PRIME	avrPphB	AT1G12230	terminator	4150556	4152056	0	0	0	0	0	0	0	0	0	0	0	0	0	0	0	0	0	0	0	0	0	0	0	0	0	0	0	0	0	0	0	0	0	0	0	0	0	0
1.4151428.G_C.avrPphB	1	4151428	G	C	0.288889	INTERGENIC	avrPphB	AT1G12230	terminator	4150556	4152056	0	0	0	0	0	0	0	0	0	0	0	0	0	0	0	0	0	0	0	0	0	0	0	0	0	0	0	0	0	0	0	0	0	0	0	0	0	0
1.4151508.A_G.avrPphB	1	4151508	A	G	0.288889	INTERGENIC	avrPphB	AT1G12230	terminator	4150556	4152056	0	0	0	0	0	0	0	0	0	0	0	0	0	0	0	0	0	0	0	0	0	0	0	0	0	0	0	0	0	0	0	0	0	0	0	0	0	0
1.4150944.T_G.avrPphB	1	4150944	T	G	0.288889	UTR_3_PRIME	avrPphB	AT1G12230	terminator	4150556	4152056	0	0	0	0	0	0	0	0	0	0	0	0	0	0	0	0	0	0	0	0	0	0	0	0	0	0	0	0	0	0	0	0	0	0	0	0	0	0
1.4150972.T_C.avrPphB	1	4150972	T	C	0.288889	UTR_3_PRIME	avrPphB	AT1G12230	terminator	4150556	4152056	0	0	0	0	0	0	0	0	0	0	0	0	0	0	0	0	0	0	0	0	0	0	0	0	0	0	0	0	0	0	0	0	0	0	0	0	0	0
1.4151002.T_C.avrPphB	1	4151002	T	C	0.288889	UTR_3_PRIME	avrPphB	AT1G12230	terminator	4150556	4152056	0	0	0	0	0	0	0	0	0	0	0	0	0	0	0	0	0	0	0	0	0	0	0	0	0	0	0	0	0	0	0	0	0	0	0	0	0	0
1.4150788.G_C.avrPphB	1	4150788	G	C	0.288889	UTR_3_PRIME	avrPphB	AT1G12230	terminator	4150556	4152056	0	0	0	0	0	0	0	0	0	0	0	0	0	0	0	0	0	0	0	0	0	0	0	0	0	0	0	0	0	0	0	0	0	0	0	0	0	0
1.4150809.A_T.avrPphB	1	4150809	A	T	0.288889	UTR_3_PRIME	avrPphB	AT1G12230	terminator	4150556	4152056	0	0	0	0	0	0	0	0	0	0	0	0	0	0	0	0	0	0	0	0	0	0	0	0	0	0	0	0	0	0	0	0	0	0	0	0	0	0
1.4151449.T_A.avrPphB	1	4151449	T	A	0.288889	INTERGENIC	avrPphB	AT1G12230	terminator	4150556	4152056	0	0	0	0	0	0	0	0	0	0	0	0	0	0	0	0	0	0	0	0	0	0	0	0	1	0	0	0	0	0	0	0	0	0	0	0	0	0
1.4150821.G_T.avrPphB	1	4150821	G	T	0.288889	UTR_3_PRIME	avrPphB	AT1G12230	terminator	4150556	4152056	0	0	0	0	0	0	0	0	0	0	0	0	0	0	0	0	0	0	0	0	0	0	0	0	0	0	0	0	0	0	0	0	0	0	0	0	0	0
1.4150937.T_C.avrPphB	1	4150937	T	C	0.288889	UTR_3_PRIME	avrPphB	AT1G12230	terminator	4150556	4152056	0	0	0	0	0	0	0	0	0	0	0	0	0	0	0	0	0	0	0	0	0	0	0	0	0	0	0	0	0	0	0	0	0	0	0	0	0	0
1.4151267.C_G.avrPphB	1	4151267	C	G	0.288889	INTERGENIC	avrPphB	AT1G12230	terminator	4150556	4152056	0	0	0	0	0	0	0	0	0	0	0	0	0	0	0	0	0	0	0	0	0	0	0	0	0	0	0	0	0	0	0	0	0	0	0	0	0	0
1.1557777.A_T.clim-gs tmax	1	1557777	A	T	0.011976	INTERGENIC	clim-gs tmax	AT1G05340	terminator	1557777	1559277	0	0	0	0	0	0	0	0	0	0	0	0	0	0	0	0	0	0	0	0	0	0	0	0	0	0	0	0	0	0	0	0	0	0	0	0	0	0
1.1557778.T_G.clim-gs tmax	1	1557778	T	G	0.011976	INTERGENIC	clim-gs tmax	AT1G05340	terminator	1557777	1559277	0	0	0	0	0	0	0	0	0	0	0	0	0	0	0	0	0	0	0	0	0	0	0	0	0	0	0	0	0	0	0	0	0	0	0	0	0	0
1.1231056.C_A.clim-tmax2	1	1231056	C	A	0.0678643	INTERGENIC	clim-tmax2	AT1G04520	promoter	1230451	1231951	0	0	0	0	0	0	0	0	0	0	0	0	0	0	0	0	0	0	0	0	0	0	0	0	0	0	0	0	0	0	0	0	0	-1	0	0	0	0
1.1422325.C_G.clim-tmax1	1	1422325	C	G	0.0139721	INTERGENIC	clim-tmax1	AT1G04990	promoter	1421363	1422863	0	0	0	0	0	0	0	0	0	0	0	0	0	0	0	0	0	0	0	0	0	0	0	0	0	0	0	0	0	0	0	0	0	0	0	0	0	0
1.1422735.T_G.clim-tmax1	1	1422735	T	G	0.0139721	INTERGENIC	clim-tmax1	AT1G04990	promoter	1421363	1422863	0	0	0	0	0	0	0	0	0	0	0	0	0	0	0	0	0	0	0	0	0	0	0	0	0	0	0	0	0	0	0	0	0	0	0	0	0	0
1.16269128.T_C.clim-cyclelength	1	16269128	T	C	0.0399202	UTR_5_PRIME	clim-cyclelength	AT1G43170	terminator	16268445	16269945	0	0	0	0	0	0	0	0	0	0	0	0	0	0	0	0	0	0	0	0	0	0	0	0	0	0	0	0	0	0	0	0	0	0	0	0	0	0
1.7398426.A_G.clim-tmin11	1	7398426	A	G	0.0598802	INTERGENIC	clim-tmin11	AT1G21130	terminator	7397813	7399313	0	0	0	0	0	0	0	0	0	-1	0	0	0	0	0	0	0	0	0	0	0	0	0	0	0	0	0	1	0	0	0	0	0	0	0	0	0	0
1.13036365.T_C.clim-tmin2	1	13036365	T	C	0.056338	INTERGENIC	clim-tmin2	AT1G35440	promoter	13035537	13037037	0	0	0	0	0	0	0	0	0	0	0	0	0	0	0	0	0	0	0	0	0	0	0	0	0	0	0	0	0	0	0	0	0	0	0	0	0	0
1.25058454.G_A.clim-bio1	1	25058454	G	A	0.016	INTERGENIC	clim-bio1	AT1G67105	terminator	25057764	25059264	0	0	0	0	0	0	0	0	0	0	0	0	0	0	0	0	0	0	0	0	0	0	0	0	0	0	0	0	0	0	0	0	0	0	0	0	0	0
1.29844365.T_C.clim-aet11	1	29844365	T	C	0.0139721	SYNONYMOUS_CODING	clim-aet11	AT1G79340	terminator	29844138	29845638	0	0	0	0	0	0	0	0	0	0	0	0	0	0	0	0	0	0	0	0	0	0	0	0	0	0	0	0	0	0	0	0	0	0	0	0	0	0
1.23854094.G_A.clim-gs9	1	23854094	G	A	0.0139721	NON_SYNONYMOUS_CODING	clim-gs9	AT1G08667	promoter	23853907	23855407	0	0	0	0	0	0	0	0	0	0	0	0	0	0	0	0	0	0	0	0	0	0	0	0	0	0	0	0	0	0	0	0	0	0	0	0	0	0
1.23856356.G_A.clim-gs9	1	23856356	G	A	0.0139721	INTERGENIC	clim-gs9	AT1G64290	terminator	23856177	23857677	0	0	0	0	0	0	0	0	0	0	0	0	0	0	0	0	0	0	0	0	0	0	1	0	0	0	0	0	0	0	0	0	0	0	0	0	0	0
1.23847997.C_T.clim-gs9	1	23847997	C	T	0.0139721	NON_SYNONYMOUS_CODING	clim-gs9	AT1G64255	terminator	23846706	23848206	0	0	0	0	0	0	0	0	0	0	0	0	0	0	0	0	0	0	0	0	0	0	0	0	0	0	0	0	0	0	0	0	0	0	0	0	0	0
1.23850650.A_G.clim-gs9	1	23850650	A	G	0.0139721	.	clim-gs9	AT1G64260	terminator	23849642	23851142	0	0	0	0	0	0	0	0	0	0	0	0	0	0	0	0	0	0	0	0	0	0	0	0	0	0	0	0	0	0	0	0	0	0	0	0	0	0
1.23855799.T_A.clim-gs9	1	23855799	T	A	0.0139721	INTERGENIC	clim-gs9	AT1G64280	promoter	23855158	23856658	0	0	0	0	0	0	0	0	0	0	0	0	0	0	0	0	0	0	0	0	0	0	0	0	0	0	0	0	0	0	0	0	0	0	0	0	0	0
1.23856399.C_T.clim-gs9	1	23856399	C	T	0.0139721	INTERGENIC	clim-gs9	AT1G64290	terminator	23856177	23857677	0	0	0	0	0	0	0	0	0	0	0	0	0	0	0	0	0	0	0	0	0	0	0	0	0	0	0	0	0	0	0	0	0	0	0	0	0	0
1.27732801.T_C.clim-bio6	1	27732801	T	C	0.0663984	INTERGENIC	clim-bio6	AT1G73730	promoter	27732183	27733683	0	0	0	0	0	0	0	0	0	0	0	0	0	0	0	0	0	0	0	0	0	0	0	0	0	0	0	0	0	0	0	0	0	0	0	0	0	0
1.27787206.C_G.clim-bio6	1	27787206	C	G	0.0663984	NON_SYNONYMOUS_CODING	clim-bio6	AT1G73880	terminator	27786304	27787804	0	0	0	0	0	0	0	0	0	0	0	0	0	0	0	0	0	0	1	0	0	0	0	0	0	0	0	0	0	0	0	0	0	0	0	0	0	0
1.1289246.C_T.clim-tmax1	1	1289246	C	T	0.0139721	INTRON	clim-tmax1	AT1G04630	terminator	1288733	1290233	0	0	0	0	0	0	0	0	0	-1	0	0	0	0	0	0	0	0	0	0	0	0	0	0	0	0	0	0	0	0	0	0	0	0	0	0	0	0
1.21021627.A_T.clim-gs9	1	21021627	A	T	0.011976	INTERGENIC	clim-gs9	AT1G56160	promoter	21021383	21022883	0	0	0	0	0	0	0	0	0	0	0	0	0	0	0	0	0	0	0	0	0	0	0	0	0	0	0	0	0	0	0	0	0	0	0	0	0	0
1.21014667.T_A.clim-gs9	1	21014667	T	A	0.0279441	INTERGENIC	clim-gs9	AT1G56145	promoter	21013595	21015095	0	0	0	0	0	0	0	0	0	0	0	0	0	0	0	0	0	0	0	0	0	0	0	0	0	0	0	0	0	0	0	0	0	0	0	0	0	0
1.24637781.A_G.clim-bio9	1	24637781	A	G	0.012	SYNONYMOUS_CODING	clim-bio9	AT1G66170	terminator	24637684	24639184	0	0	0	0	0	0	0	0	0	0	0	0	0	0	0	0	0	0	0	0	0	0	0	0	0	0	0	0	0	0	0	0	0	0	0	0	0	0
1.18549593.C_T.clim-tmin6	1	18549593	C	T	0.0139721	.	clim-tmin6	AT1G50050	terminator	18548546	18550046	0	0	0	0	0	0	0	0	0	0	0	0	0	0	0	0	0	0	0	0	0	0	0	0	0	0	0	0	0	0	0	0	0	0	0	0	0	0
1.22897814.C_A.clim-tmax2	1	22897814	C	A	0.011976	NON_SYNONYMOUS_CODING	clim-tmax2	AT1G61940	terminator	22896398	22897898	0	0	0	0	0	0	0	0	0	0	0	0	0	0	0	0	0	0	0	0	0	0	0	0	0	0	0	0	0	0	0	0	0	0	0	0	0	0
1.8377281.A_G.clim-tmax12	1	8377281	A	G	0.0219561	UTR_3_PRIME	clim-tmax12	AT1G23680	promoter	8376656	8378156	0	0	0	0	0	0	0	0	0	0	0	0	0	0	0	0	0	0	0	0	0	0	0	0	0	0	0	0	0	0	0	0	0	0	0	0	0	0
1.8377459.C_T.clim-tmax12	1	8377459	C	T	0.0219561	NON_SYNONYMOUS_CODING	clim-tmax12	AT1G23680	promoter	8376656	8378156	0	0	0	0	0	0	0	0	0	0	0	0	0	0	0	0	0	0	0	0	0	0	0	0	0	0	0	0	0	0	0	0	0	0	0	0	0	0
1.1242109.A_C.clim-tmax2	1	1242109	A	C	0.0299401	UTR_3_PRIME	clim-tmax2	AT1G04550	terminator	1241657	1243157	0	0	0	0	0	0	0	0	0	0	0	0	0	0	0	0	0	0	1	0	0	0	0	0	0	0	0	0	0	0	0	0	0	0	0	0	0	0
1.3901723.G_C.clim-tmax2	1	3901723	G	C	0.0179641	INTERGENIC	clim-tmax2	AT1G11600	promoter	3900949	3902449	0	0	0	0	0	0	0	0	0	0	0	0	0	0	0	0	0	0	0	0	0	0	0	0	0	0	0	0	0	0	0	0	0	0	0	0	0	0
1.28302971.A_G.clim-tmin3	1	28302971	A	G	0.0414938	INTERGENIC	clim-tmin3	AT1G75410	promoter	28302228	28303728	0	0	0	0	0	0	0	0	0	0	0	0	0	0	0	0	0	0	0	0	0	0	0	0	0	0	0	0	0	0	0	0	0	0	0	0	0	0
1.24523839.C_G.clim-bio9	1	24523839	C	G	0.014	INTRON	clim-bio9	AT1G65910	promoter	24523760	24525260	0	0	0	0	0	0	0	0	0	0	0	0	0	0	0	0	0	0	0	0	0	0	0	0	0	0	0	0	0	0	0	0	0	0	0	0	0	0
1.1434216.C_T.clim-tmax1	1	1434216	C	T	0.0139721	INTERGENIC	clim-tmax1	AT1G05020	terminator	1434154	1435654	0	0	0	0	0	0	0	0	0	0	0	0	0	0	0	0	0	0	0	0	0	0	0	0	0	0	0	0	0	0	0	0	0	0	0	0	0	0
1.1226716.G_A.clim-tmax2	1	1226716	G	A	0.0299401	UTR_5_PRIME	clim-tmax2	AT1G04510	promoter	1225482	1226982	0	0	0	0	0	0	0	0	0	0	0	0	0	0	0	0	0	0	0	0	0	0	0	0	0	0	0	0	0	0	0	0	0	0	0	0	0	0
1.27674631.C_A.clim-bio6	1	27674631	C	A	0.0704225	INTRON	clim-bio6	AT1G73603	promoter	27673287	27674787	0	0	0	0	0	0	0	0	0	0	0	0	0	0	0	0	0	0	0	0	0	1	0	0	0	0	0	0	0	0	0	0	0	0	0	0	0	0
1.27977765.C_A.clim-tmax3	1	27977765	C	A	0.068	INTRON	clim-tmax3	AT1G74430	terminator	27976934	27978434	0	0	0	0	0	0	0	0	0	0	0	0	0	0	0	0	0	0	-1	0	0	0	0	0	0	0	0	1	0	0	0	0	0	0	0	0	0	0
1.1141138.T_G.clim-tmax2	1	1141138	T	G	0.0239521	NON_SYNONYMOUS_CODING	clim-tmax2	AT1G04260	promoter	1141064	1142564	0	0	0	0	0	0	0	0	0	0	0	0	0	0	0	0	0	0	1	0	0	0	0	0	0	0	0	0	0	0	0	0	0	0	0	0	0	0
1.3894195.C_G.clim-tmax2	1	3894195	C	G	0.0139721	NON_SYNONYMOUS_CODING	clim-tmax2	AT1G11590	terminator	3894177	3895677	0	0	0	0	0	0	0	0	0	0	0	0	0	0	0	0	0	0	0	0	0	0	0	0	0	0	0	1	0	0	0	0	0	0	0	0	0	0
1.3873713.A_G.clim-tmax2	1	3873713	A	G	0.0139721	INTERGENIC	clim-tmax2	AT1G11520	terminator	3873119	3874619	0	0	0	0	0	-1	0	0	0	0	0	0	0	0	0	0	0	0	0	0	0	0	0	0	0	0	0	0	0	0	0	0	0	0	0	0	0	0
1.3892387.G_A.clim-tmax2	1	3892387	G	A	0.0139721	INTERGENIC	clim-tmax2	AT1G11590	promoter	3891579	3893079	0	0	0	0	0	0	0	0	0	0	0	0	0	0	0	0	0	0	0	0	0	0	0	0	0	0	0	0	-1	0	0	0	0	0	0	0	0	0
1.3898541.C_T.clim-tmax2	1	3898541	C	T	0.0139721	SYNONYMOUS_CODING	clim-tmax2	AT1G11593	terminator	3898109	3899609	0	0	0	0	0	0	0	0	0	0	0	0	0	0	0	0	0	0	0	0	0	0	0	0	0	0	0	0	0	0	0	0	0	0	0	0	0	0
1.3906723.A_C.clim-tmax2	1	3906723	A	C	0.0139721	UTR_3_PRIME	clim-tmax2	AT1G11608	terminator	3906318	3907818	0	0	0	0	0	0	0	0	0	0	0	0	0	0	0	0	0	0	0	0	0	0	0	0	0	0	0	0	0	0	0	0	0	0	0	0	0	0
1.3907283.G_C.clim-tmax2	1	3907283	G	C	0.0139721	INTRON	clim-tmax2	AT1G11608	terminator	3906318	3907818	0	0	0	0	0	0	0	0	0	0	0	0	0	0	0	0	0	0	0	0	0	0	0	0	0	0	0	0	0	0	0	0	0	0	0	0	0	0
1.3894400.C_T.clim-tmax2	1	3894400	C	T	0.0139721	NON_SYNONYMOUS_CODING	clim-tmax2	AT1G11590	terminator	3894177	3895677	0	0	0	0	0	0	0	0	0	0	0	0	0	0	0	0	0	0	0	0	0	0	0	0	0	0	0	0	0	0	0	0	0	0	0	0	0	0
1.22709283.T_C.clim-tmin6	1	22709283	T	C	0.0139721	SYNONYMOUS_CODING	clim-tmin6	AT1G61562	promoter	22708008	22709508	0	0	0	0	0	0	0	0	0	0	0	0	0	0	0	0	0	0	0	0	0	0	0	0	0	0	0	0	0	0	0	0	0	0	0	0	0	0
1.8935860.C_G.clim-tmax12	1	8935860	C	G	0.0139721	INTERGENIC	clim-tmax12	AT1G25440	promoter	8935044	8936544	0	0	0	0	0	0	0	0	0	0	0	0	0	0	0	0	0	0	0	0	0	0	0	0	0	0	0	0	0	0	0	0	0	0	0	0	0	0
1.8937978.A_G.clim-tmax12	1	8937978	A	G	0.0139721	INTERGENIC	clim-tmax12	AT1G25450	terminator	8937386	8938886	0	0	0	0	0	0	0	0	0	0	0	0	0	0	0	0	0	0	0	0	0	1	0	0	0	0	0	0	0	0	0	0	0	0	0	0	0	0
1.8947698.C_G.clim-tmax12	1	8947698	C	G	0.0139721	INTERGENIC	clim-tmax12	AT1G25480	promoter	8947231	8948731	0	0	0	0	0	0	0	0	0	0	0	0	0	0	0	0	0	0	0	0	0	0	0	0	0	0	0	0	0	0	0	0	0	0	0	0	0	0
1.8978937.C_T.clim-tmax12	1	8978937	C	T	0.0139721	INTERGENIC	clim-tmax12	AT1G25550	terminator	8977805	8979305	0	0	0	0	0	0	0	0	0	0	0	0	0	0	0	0	0	0	0	0	0	0	0	0	0	0	0	0	0	0	0	0	0	0	0	0	0	0
1.8938645.G_A.clim-tmax12	1	8938645	G	A	0.0139721	UTR_3_PRIME	clim-tmax12	AT1G25450	terminator	8937386	8938886	0	0	0	0	0	0	0	0	0	0	0	0	0	0	0	0	0	0	0	0	0	0	0	0	0	0	0	0	0	0	0	0	0	0	0	0	0	0
1.8942712.G_C.clim-tmax12	1	8942712	G	C	0.0139721	INTERGENIC	clim-tmax12	AT1G25460	promoter	8941712	8943212	0	0	0	0	0	0	0	0	0	0	0	0	0	0	0	0	0	0	0	0	0	0	0	0	0	0	0	0	0	0	0	0	0	0	0	0	0	0
1.8947948.A_T.clim-tmax12	1	8947948	A	T	0.0139721	INTERGENIC	clim-tmax12	AT1G25480	promoter	8947231	8948731	0	0	0	0	0	0	0	0	0	0	0	0	0	0	0	0	0	0	0	0	0	0	0	0	0	0	0	0	0	0	0	0	0	0	0	0	0	0
1.9028060.G_C.clim-tmax12	1	9028060	G	C	0.0139721	INTERGENIC	clim-tmax12	AT1G26120	terminator	9027375	9028875	0	0	0	0	0	0	0	0	0	0	0	0	0	0	0	0	0	0	0	0	0	0	0	0	0	0	0	0	0	0	0	0	0	0	0	0	0	0
1.8974911.A_G.clim-tmax12	1	8974911	A	G	0.0139721	INTERGENIC	clim-tmax12	AT1G25540	promoter	8974315	8975815	0	0	0	0	0	0	0	0	0	0	0	0	0	0	0	0	0	0	0	0	1	0	0	0	0	0	0	0	0	0	0	0	0	0	0	0	0	0
1.25096456.C_T.clim-tmin6	1	25096456	C	T	0.011976	INTERGENIC	clim-tmin6	AT1G67120	promoter	25095138	25096638	0	0	0	0	0	0	0	0	0	0	0	0	0	0	0	0	0	0	0	0	0	0	0	0	0	0	0	0	0	0	0	0	0	0	0	0	0	0
1.1676511.T_A.clim-tmax12	1	1676511	T	A	0.011976	INTERGENIC	clim-tmax12	AT1G05610	promoter	1675577	1677077	0	0	0	0	0	0	0	0	0	0	0	0	0	0	0	0	0	0	0	0	0	0	0	0	0	0	0	0	0	0	0	0	0	0	0	0	0	0
1.1669463.A_G.clim-tmax12	1	1669463	A	G	0.011976	.	clim-tmax12	AT1G05590	promoter	1668349	1669849	0	0	0	0	0	0	0	0	0	0	0	0	0	0	0	0	0	0	0	0	0	0	0	0	0	0	0	0	0	0	0	0	0	0	0	0	0	0
1.27688275.C_A.clim-bio6	1	27688275	C	A	0.0643863	UTR_3_PRIME	clim-bio6	AT1G73650	terminator	27687122	27688622	0	0	0	0	0	0	0	0	0	0	0	0	0	0	0	0	0	0	0	0	0	0	0	0	0	0	0	0	0	0	0	0	0	0	0	0	0	0
1.27684855.C_T.clim-bio6	1	27684855	C	T	0.0643863	SYNONYMOUS_CODING	clim-bio6	AT1G73630	promoter	27683672	27685172	0	0	0	0	0	0	0	0	0	0	0	0	0	0	0	0	0	0	0	0	0	0	0	0	0	0	0	0	0	0	0	0	0	0	0	0	0	0
1.10960880.T_A.clim-tmin3	1	10960880	T	A	0.0124481	INTERGENIC	clim-tmin3	AT1G30825	promoter	10959907	10961407	0	0	0	0	0	0	0	0	0	0	0	0	0	0	0	0	0	0	0	0	0	0	0	0	0	0	0	0	0	0	0	0	0	0	0	0	0	0
1.8392376.G_A.clim-bio9	1	8392376	G	A	0.012	INTERGENIC	clim-bio9	AT1G23720	terminator	8391123	8392623	0	0	0	0	0	0	0	0	0	0	0	0	0	0	0	0	0	0	0	0	0	0	0	0	0	0	0	0	0	0	0	0	0	0	0	0	0	0
1.27757518.C_G.clim-bio6	1	27757518	C	G	0.0663984	INTERGENIC	clim-bio6	AT1G73820	promoter	27756963	27758463	0	0	0	0	0	0	0	0	0	0	0	0	0	0	0	0	0	0	0	0	0	0	0	0	0	0	0	0	0	0	0	0	0	0	0	0	0	0
1.27754978.T_G.clim-bio6	1	27754978	T	G	0.0663984	SYNONYMOUS_CODING	clim-bio6	AT1G73810	promoter	27754797	27756297	0	0	0	0	0	0	0	0	0	0	0	0	0	0	0	0	0	0	0	0	0	0	0	0	0	0	0	0	0	0	0	0	0	0	0	0	0	0
1.9326158.G_C.clim-bio8	1	9326158	G	C	0.0219561	INTERGENIC	clim-bio8	AT1G06037	terminator	9324759	9326259	0	0	0	0	0	0	0	0	0	0	0	0	0	0	0	0	0	0	0	0	0	0	0	0	0	0	0	0	0	0	0	0	0	0	0	0	0	0
1.9331688.G_A.clim-bio8	1	9331688	G	A	0.0219561	INTERGENIC	clim-bio8	AT1G26921	promoter	9330701	9332201	0	0	0	0	0	0	0	0	0	0	0	0	0	0	0	0	0	0	0	0	0	0	0	0	0	0	0	0	0	0	0	0	0	0	0	0	0	0
1.9329089.A_C.clim-bio8	1	9329089	A	C	0.0219561	INTERGENIC	clim-bio8	AT1G26920	promoter	9328492	9329992	0	0	0	0	0	0	0	0	0	0	0	0	0	0	0	0	0	0	0	0	0	0	0	0	0	0	0	0	0	0	0	0	0	0	0	0	0	0
1.19398309.G_A.clim-gs9	1	19398309	G	A	0.0139721	INTERGENIC	clim-gs9	AT1G52120	promoter	19397744	19399244	0	0	0	0	0	0	0	0	0	0	0	0	0	0	0	0	0	0	0	0	0	1	0	0	0	0	0	0	0	0	0	0	0	0	0	0	0	0
1.19397978.T_C.clim-gs9	1	19397978	T	C	0.0139721	INTRON	clim-gs9	AT1G52120	promoter	19397744	19399244	0	0	0	0	0	0	0	0	0	0	0	0	0	0	0	0	0	0	0	0	0	0	0	0	0	0	0	0	0	0	0	0	0	0	0	0	0	0
1.27568118.C_T.clim-bio6	1	27568118	C	T	0.0724346	SYNONYMOUS_CODING	clim-bio6	AT1G73325	promoter	27567781	27569281	0	-1	0	0	0	0	0	0	0	0	0	0	0	0	0	0	0	0	0	0	0	0	0	0	0	0	0	0	0	0	0	0	0	0	0	0	0	0
1.27566627.C_G.clim-bio6	1	27566627	C	G	0.0724346	INTRON	clim-bio6	AT1G73325	terminator	27566418	27567918	0	0	0	0	0	0	0	0	0	0	0	0	0	0	0	0	0	0	0	0	0	0	0	0	0	0	0	0	0	0	0	0	0	0	0	0	0	0
1.24489318.T_A.clim-bio9	1	24489318	T	A	0.012	INTERGENIC	clim-bio9	AT1G65840	promoter	24488757	24490257	0	0	0	0	0	0	0	0	0	0	0	0	0	0	0	0	0	0	0	0	0	0	0	0	0	0	0	0	0	0	0	0	0	0	0	0	0	0
1.18560360.T_A.clim-tmin6	1	18560360	T	A	0.0139721	INTERGENIC	clim-tmin6	AT1G50110	promoter	18559891	18561391	0	0	0	0	0	0	0	0	0	0	0	0	0	0	0	0	0	0	0	0	0	0	0	0	0	0	0	0	0	0	0	0	0	0	0	0	0	0
1.18614413.C_G.clim-tmin6	1	18614413	C	G	0.0139721	NON_SYNONYMOUS_CODING	clim-tmin6	AT1G50250	terminator	18613200	18614700	0	0	0	0	0	0	0	0	0	0	0	0	0	0	0	0	0	0	0	0	0	0	0	0	0	0	0	0	0	0	0	0	0	0	0	0	0	0
1.18560002.A_T.clim-tmin6	1	18560002	A	T	0.0139721	NON_SYNONYMOUS_CODING	clim-tmin6	AT1G50110	promoter	18559891	18561391	0	0	0	0	0	0	0	0	0	0	0	0	0	0	0	0	0	0	0	0	0	0	0	0	0	0	0	0	0	0	0	0	0	0	0	0	0	0
1.18566600.C_A.clim-tmin6	1	18566600	C	A	0.0139721	INTERGENIC	clim-tmin6	AT1G50120	terminator	18565769	18567269	0	0	0	0	0	0	0	0	0	0	0	0	0	0	0	0	0	0	0	0	0	0	0	0	0	0	0	0	0	0	0	0	0	0	0	0	0	0
1.27853615.A_T.clim-tmin1	1	27853615	A	T	0.0681363	INTERGENIC	clim-tmin1	AT1G74070	promoter	27852769	27854269	0	0	0	0	0	0	0	0	0	0	0	-1	0	0	0	0	0	0	0	0	0	0	0	0	0	0	0	0	0	0	0	0	0	0	0	0	0	0
1.27842188.C_G.clim-tmin1	1	27842188	C	G	0.0681363	UTR_5_PRIME	clim-tmin1	AT1G74030	promoter	27841632	27843132	0	0	0	0	0	0	0	0	0	0	0	0	0	0	0	0	0	0	0	0	0	0	0	0	0	0	0	0	0	0	0	0	0	0	0	0	0	0
1.25132162.A_G.clim-tmax5	1	25132162	A	G	0.011976	NON_SYNONYMOUS_CODING	clim-tmax5	AT1G67190	promoter	25131497	25132997	0	0	0	0	0	0	0	0	0	0	0	0	0	0	0	0	0	0	0	0	0	0	0	0	0	0	0	0	0	0	0	0	0	0	0	0	0	0
1.13362212.T_G.clim-tmax2	1	13362212	T	G	0.0578842	INTERGENIC	clim-tmax2	AT1G35910	terminator	13361961	13363461	0	0	0	0	0	0	0	0	0	0	0	0	0	0	0	0	0	0	0	0	0	0	0	0	0	0	0	0	0	0	0	0	0	0	0	0	0	0
1.1433895.T_A.clim-tmax2	1	1433895	T	A	0.0139721	INTERGENIC	clim-tmax2	AT1G05010	promoter	1432510	1434010	0	0	0	0	0	0	0	0	0	0	0	0	0	0	0	0	0	0	0	0	0	0	0	0	0	0	0	0	0	0	0	0	0	0	0	0	0	0
1.2929138.G_A.FT Field	1	2929138	G	A	0.0555556	INTERGENIC	FT Field	AT1G09080	terminator	2928216	2929716	0	0	0	0	0	0	0	0	0	0	0	0	0	0	0	0	0	0	0	0	0	0	0	0	0	0	0	0	0	0	0	0	0	0	0	0	0	0
1.12217499.T_A.clim-tmax2	1	12217499	T	A	0.0299401	INTERGENIC	clim-tmax2	AT1G06697	terminator	12216891	12218391	0	0	0	0	0	0	0	0	0	0	0	0	0	0	0	0	0	0	0	0	0	0	0	0	0	0	0	0	0	0	0	0	0	0	0	0	0	0
1.24913106.T_C.clim-aet1	1	24913106	T	C	0.011976	INTERGENIC	clim-aet1	AT1G08847	terminator	24912477	24913977	0	0	0	0	0	0	0	0	0	0	0	0	0	0	0	0	0	0	0	0	0	0	0	0	0	0	0	0	0	0	0	0	0	0	0	0	0	0
1.8381989.C_T.clim-tmax12	1	8381989	C	T	0.0279441	INTERGENIC	clim-tmax12	AT1G23700	promoter	8381790	8383290	0	-1	0	0	0	0	0	0	0	0	0	0	0	0	0	0	0	0	0	0	0	0	0	0	0	0	0	0	0	0	0	0	0	0	0	0	0	0
1.9331635.A_T.clim-bio8	1	9331635	A	T	0.0199601	INTERGENIC	clim-bio8	AT1G26921	promoter	9330701	9332201	0	0	0	0	0	0	0	0	0	0	0	0	0	0	0	0	0	0	0	0	0	0	0	0	0	0	0	0	0	0	0	0	0	0	0	0	0	0
1.27597673.A_T.clim-tmax10	1	27597673	A	T	0.0179641	INTERGENIC	clim-tmax10	AT1G73400	promoter	27597032	27598532	0	0	0	0	0	0	0	0	0	0	0	0	0	0	0	0	0	0	0	0	0	0	0	0	0	0	0	0	0	0	0	0	0	0	0	0	0	0
1.7339658.T_C.clim-tmax1	1	7339658	T	C	0.0139721	INTERGENIC	clim-tmax1	AT1G21000	terminator	7338952	7340452	0	0	0	0	0	0	0	0	0	0	0	0	0	0	0	0	0	0	0	0	0	0	0	0	0	0	0	0	0	0	0	0	0	0	0	0	0	0
1.7347352.A_C.clim-tmax1	1	7347352	A	C	0.0139721	INTERGENIC	clim-tmax1	AT1G21010	terminator	7346783	7348283	0	0	0	0	0	0	0	0	0	0	0	0	0	0	0	0	0	0	0	0	0	0	0	0	0	0	0	0	0	0	0	0	0	0	0	0	0	0
1.24920296.G_A.clim-aet1	1	24920296	G	A	0.011976	INTERGENIC	clim-aet1	AT1G66795	promoter	24920085	24921585	0	0	0	0	0	0	0	0	0	0	0	0	0	0	0	0	0	0	0	0	0	0	0	0	0	0	0	0	0	0	0	0	0	0	0	0	0	0
1.3231222.G_C.clim-tmax2	1	3231222	G	C	0.0359281	INTRON	clim-tmax2	AT1G09930	promoter	3229757	3231257	0	0	0	0	0	0	0	0	0	0	0	0	0	0	0	0	0	0	0	0	0	0	0	0	0	0	0	0	0	0	0	0	0	-1	0	0	0	0
1.1030349.A_G.clim-bio9	1	1030349	A	G	0.03	INTERGENIC	clim-bio9	AT1G04010	terminator	1029956	1031456	0	0	0	0	0	0	0	0	0	0	0	0	0	0	0	0	0	0	0	0	0	0	0	0	0	0	0	0	0	0	0	0	0	0	0	0	0	0
1.3881957.T_C.clim-tmax2	1	3881957	T	C	0.0159681	NON_SYNONYMOUS_CODING	clim-tmax2	AT1G11560	promoter	3880626	3882126	0	0	0	0	0	0	0	0	0	0	0	0	0	0	0	0	0	0	0	0	0	0	0	0	0	0	0	0	0	0	0	0	0	0	0	0	0	0
1.3880973.C_G.clim-tmax2	1	3880973	C	G	0.0159681	INTERGENIC	clim-tmax2	AT1G11545	promoter	3879891	3881391	0	0	0	0	0	0	0	0	0	0	0	0	0	0	0	0	0	0	0	0	0	0	0	0	0	0	0	0	0	0	0	0	0	0	0	0	0	0
1.20948541.G_A.clim-gs9	1	20948541	G	A	0.011976	INTRON	clim-gs9	AT1G08087	promoter	20947160	20948660	0	0	0	0	0	0	0	0	0	0	0	0	0	0	0	0	0	0	0	0	0	0	0	0	0	0	0	0	0	1	0	0	0	0	0	0	0	0
1.24484271.T_A.clim-bio9	1	24484271	T	A	0.014	INTERGENIC	clim-bio9	AT1G65820	promoter	24484045	24485545	0	0	0	0	0	0	0	0	0	0	0	0	0	0	0	0	0	0	0	0	0	0	0	0	0	0	0	0	0	0	0	0	0	0	0	0	0	0
1.21018791.C_T.clim-gs9	1	21018791	C	T	0.011976	INTERGENIC	clim-gs9	AT1G56150	terminator	21017622	21019122	0	0	0	0	0	0	0	0	0	0	0	0	0	0	0	0	0	0	0	0	0	0	0	0	0	0	0	0	0	0	0	0	0	0	0	0	0	0
1.21018172.C_A.clim-gs9	1	21018172	C	A	0.0319361	INTERGENIC	clim-gs9	AT1G56150	terminator	21017622	21019122	0	0	0	0	0	0	0	0	0	0	0	0	0	0	0	0	0	0	0	0	0	0	0	0	0	0	0	0	0	0	0	0	0	0	0	0	0	0
1.21018125.C_T.clim-gs9	1	21018125	C	T	0.0319361	INTERGENIC	clim-gs9	AT1G56150	terminator	21017622	21019122	0	0	0	0	0	0	0	0	0	0	0	0	0	0	0	0	0	0	0	0	0	0	0	0	0	0	0	0	0	0	0	0	0	0	0	0	0	0
1.19498713.T_G.clim-gs9	1	19498713	T	G	0.0219561	INTERGENIC	clim-gs9	AT1G52360	promoter	19498145	19499645	0	0	0	0	0	0	0	0	0	0	0	0	0	0	0	0	0	0	0	0	0	0	0	0	0	0	0	0	0	0	0	0	0	0	0	0	0	0
1.22941437.A_C.clim-tmin6	1	22941437	A	C	0.011976	INTERGENIC	clim-tmin6	AT1G62060	terminator	22940568	22942068	0	0	0	0	0	0	0	0	0	0	0	0	0	0	0	0	0	0	1	0	0	0	0	0	0	0	0	0	0	0	0	0	0	0	0	0	0	0
1.16397558.G_A.clim-tmax1	1	16397558	G	A	0.0798403	INTERGENIC	clim-tmax1	AT1G43560	terminator	16396978	16398478	0	0	0	0	0	0	0	0	0	0	0	0	0	0	0	0	0	0	0	0	0	0	0	0	0	0	0	0	0	0	0	0	0	0	0	0	0	0
1.27758110.T_A.clim-bio6	1	27758110	T	A	0.0684105	INTERGENIC	clim-bio6	AT1G73820	promoter	27756963	27758463	0	0	0	0	0	0	0	0	0	0	0	0	0	0	0	0	0	0	0	0	0	0	0	0	0	0	0	0	0	0	0	0	0	0	0	0	0	0
1.7386023.A_C.clim-bio9	1	7386023	A	C	0.012	NON_SYNONYMOUS_CODING	clim-bio9	AT1G21100	terminator	7385761	7387261	0	0	0	0	0	0	0	0	0	0	0	0	0	0	0	0	0	0	0	0	0	0	0	0	0	0	0	0	0	0	0	0	0	0	0	0	0	0
1.12636324.G_A.clim-cyclelength	1	12636324	G	A	0.0618762	INTERGENIC	clim-cyclelength	AT1G34540	promoter	12636053	12637553	0	0	0	0	0	0	0	0	0	0	0	0	0	0	0	0	0	0	0	0	0	0	0	0	0	0	0	0	0	0	0	0	0	0	0	0	0	0
1.29463662.C_T.clim-aet11	1	29463662	C	T	0.0139721	UTR_3_PRIME	clim-aet11	AT1G78310	terminator	29462547	29464047	0	0	0	0	0	0	0	0	0	0	0	0	0	0	0	0	0	0	0	0	0	0	0	0	0	0	0	0	0	0	0	0	0	0	0	0	0	0
1.29466046.G_T.clim-aet11	1	29466046	G	T	0.0139721	INTERGENIC	clim-aet11	AT1G78310	promoter	29464749	29466249	0	0	0	0	0	0	0	0	0	0	0	0	0	0	0	0	0	0	0	0	0	0	0	0	0	0	0	0	0	0	0	0	0	0	0	0	1	0
1.29457271.T_G.clim-aet11	1	29457271	T	G	0.0139721	UTR_3_PRIME	clim-aet11	AT1G78290	terminator	29456204	29457704	0	0	0	0	0	0	0	0	0	0	0	0	0	0	0	0	0	0	0	0	0	0	0	0	0	0	0	0	-1	0	0	0	0	0	0	0	0	0
1.29463621.G_A.clim-aet11	1	29463621	G	A	0.0139721	INTERGENIC	clim-aet11	AT1G78310	terminator	29462547	29464047	0	0	0	0	0	0	0	0	0	0	0	0	0	0	0	0	0	0	0	0	0	0	0	0	0	0	0	-1	0	0	0	0	0	0	0	0	0	0
1.20942975.C_T.clim-gs9	1	20942975	C	T	0.0159681	INTERGENIC	clim-gs9	AT1G55990	promoter	20942451	20943951	0	0	0	0	0	0	0	0	0	0	0	0	0	0	0	0	0	0	0	0	0	0	0	0	0	0	0	0	0	0	0	0	0	0	0	0	0	0
1.20943349.C_T.clim-gs9	1	20943349	C	T	0.0159681	INTERGENIC	clim-gs9	AT1G56000	promoter	20943135	20944635	0	0	0	0	0	0	0	0	0	0	0	0	0	0	0	0	0	0	0	0	0	0	0	0	0	0	0	0	0	0	0	0	0	0	0	0	0	0
1.20943250.C_T.clim-gs9	1	20943250	C	T	0.0159681	INTERGENIC	clim-gs9	AT1G56000	promoter	20943135	20944635	0	0	0	0	0	0	0	0	0	0	0	0	0	0	0	0	0	0	0	0	0	0	0	0	0	0	0	0	0	0	0	0	0	0	0	0	0	0
1.20943275.G_A.clim-gs9	1	20943275	G	A	0.0159681	INTERGENIC	clim-gs9	AT1G56000	promoter	20943135	20944635	0	0	0	0	0	0	0	0	0	0	0	0	0	0	0	0	0	0	0	0	0	0	0	0	0	0	0	0	0	0	0	0	0	0	0	0	0	0
1.20943489.A_G.clim-gs9	1	20943489	A	G	0.0159681	INTERGENIC	clim-gs9	AT1G56000	promoter	20943135	20944635	0	0	0	0	0	0	0	0	0	0	0	0	0	0	0	0	0	0	0	0	0	0	-1	0	0	0	0	0	0	0	0	0	0	0	0	0	0	0
1.3879944.C_T.clim-tmax2	1	3879944	C	T	0.0219561	INTRON	clim-tmax2	AT1G11545	promoter	3879891	3881391	0	0	0	0	0	0	0	0	0	0	0	0	0	0	0	0	0	0	0	0	0	0	0	0	0	0	0	0	0	0	0	0	0	0	0	0	0	0
1.279049.C_A.clim-tmax2	1	279049	C	A	0.0159681	NON_SYNONYMOUS_CODING	clim-tmax2	AT1G01760	promoter	278099	279599	0	0	0	0	0	0	0	0	0	0	0	0	0	0	0	0	0	0	0	0	0	0	0	0	0	0	0	0	0	0	0	0	0	0	0	0	0	0
1.27978181.A_G.clim-tmax3	1	27978181	A	G	0.07	INTRON	clim-tmax3	AT1G74430	terminator	27976934	27978434	0	0	0	0	0	0	0	0	0	0	0	0	0	0	0	0	0	0	0	0	0	0	0	0	0	0	0	0	0	0	0	0	0	0	0	0	0	0
1.27978137.C_T.clim-tmax3	1	27978137	C	T	0.07	INTRON	clim-tmax3	AT1G74430	terminator	27976934	27978434	0	0	0	0	0	0	0	0	0	0	0	0	0	0	0	0	0	0	0	0	0	0	0	0	0	0	0	0	0	0	0	0	0	0	0	0	0	0
1.19790279.T_A.clim-prec7	1	19790279	T	A	0.0159681	UTR_5_PRIME	clim-prec7	AT1G53110	promoter	19789141	19790641	0	0	0	0	0	0	0	0	0	0	0	0	0	0	0	0	0	0	0	0	0	0	0	0	0	0	0	0	0	0	0	0	0	0	0	0	0	0
1.19787905.A_G.clim-prec7	1	19787905	A	G	0.0159681	INTRON	clim-prec7	AT1G07853	terminator	19786816	19788316	0	0	0	0	0	0	0	0	0	0	0	0	0	0	0	0	0	0	0	0	0	0	0	0	0	0	0	0	0	0	0	0	0	0	0	0	0	0
1.27618658.C_G.clim-tmax1	1	27618658	C	G	0.0638723	UTR_3_PRIME	clim-tmax1	AT1G73450	terminator	27618595	27620095	0	0	0	0	0	0	0	0	0	0	0	0	0	0	0	0	0	0	0	0	0	0	0	0	0	0	0	0	0	0	0	0	0	0	0	0	0	0
1.28518715.T_G.clim-tmin3	1	28518715	T	G	0.0435685	NON_SYNONYMOUS_CODING	clim-tmin3	AT1G75950	terminator	28517396	28518896	0	0	0	0	0	0	0	0	0	0	0	0	0	0	0	0	0	0	0	0	0	0	0	0	0	0	0	0	0	0	0	0	0	0	0	0	0	0
1.3494186.C_T.clim-tmax2	1	3494186	C	T	0.0459082	NON_SYNONYMOUS_CODING	clim-tmax2	AT1G10585	terminator	3492769	3494269	0	0	0	0	0	0	0	0	0	0	0	0	0	0	0	0	0	0	0	0	0	0	0	0	0	0	0	0	0	0	0	0	0	0	0	0	0	0
1.3503858.A_T.clim-tmax2	1	3503858	A	T	0.0459082	NON_SYNONYMOUS_CODING	clim-tmax2	AT1G10590	promoter	3503044	3504544	0	0	0	0	0	0	0	0	0	0	0	0	0	0	0	0	0	0	0	0	0	0	0	0	0	0	0	0	0	0	0	0	0	0	0	0	0	0
1.24339560.G_T.FT10	1	24339560	G	T	0.442344	INTERGENIC	FT10	AT1G08757	promoter	24338370	24339870	0	0	0	0	0	0	0	0	0	0	0	0	0	0	0	0	0	0	0	0	0	0	0	0	0	0	0	0	0	0	0	0	0	0	0	0	0	0
1.4129845.T_A.DTFplantingSummerLocSweden2009	1	4129845	T	A	0.0300429	INTERGENIC	DTFplantingSummerLocSweden2009	AT1G12170	promoter	4129201	4130701	0	0	0	0	0	0	0	0	0	0	0	0	0	0	0	0	0	0	0	0	0	0	0	0	0	0	0	0	0	0	0	0	0	0	0	0	0	0
1.4129867.A_C.DTFplantingSummerLocSweden2009	1	4129867	A	C	0.0300429	INTERGENIC	DTFplantingSummerLocSweden2009	AT1G12170	promoter	4129201	4130701	0	0	0	0	0	0	0	0	0	0	0	0	0	0	0	0	0	0	0	0	0	0	0	0	0	0	0	0	0	0	0	0	0	0	0	0	0	0
1.4129847.T_G.DTFplantingSummerLocSweden2009	1	4129847	T	G	0.0300429	INTERGENIC	DTFplantingSummerLocSweden2009	AT1G12170	promoter	4129201	4130701	0	0	0	0	0	0	0	0	0	0	0	0	0	0	0	0	0	0	0	0	0	0	0	0	0	0	0	0	0	0	0	0	0	0	0	0	0	0
1.4129875.G_T.DTFplantingSummerLocSweden2009	1	4129875	G	T	0.0300429	INTERGENIC	DTFplantingSummerLocSweden2009	AT1G12170	promoter	4129201	4130701	0	0	0	0	0	0	0	0	0	0	0	0	0	0	0	0	0	0	0	0	0	0	0	0	0	0	0	0	0	0	0	0	0	0	0	0	0	0
1.2718401.G_T.clim-tmin3	1	2718401	G	T	0.033195	INTERGENIC	clim-tmin3	AT1G08590	promoter	2717537	2719037	0	0	0	0	0	0	0	0	0	0	0	0	0	0	0	0	0	0	0	0	0	0	0	0	0	0	0	0	0	0	0	0	0	0	0	0	0	0
1.2718273.T_G.clim-tmin3	1	2718273	T	G	0.033195	INTERGENIC	clim-tmin3	AT1G08590	promoter	2717537	2719037	0	0	0	0	0	0	0	0	0	0	0	0	0	0	0	0	0	0	0	0	0	0	0	0	-1	0	0	0	0	0	0	0	0	0	0	0	0	0
1.1450551.G_A.clim-bio11	1	1450551	G	A	0.0180361	INTRON	clim-bio11	AT1G05060	terminator	1450001	1451501	0	0	0	0	0	0	0	0	0	0	0	0	0	0	0	0	0	0	0	0	0	0	0	0	0	1	0	0	0	0	0	0	0	0	0	0	0	0
1.29493694.A_C.clim-tmin3	1	29493694	A	C	0.0352697	INTERGENIC	clim-tmin3	AT1G78390	promoter	29492375	29493875	0	0	0	0	0	0	0	0	0	0	0	0	0	0	0	0	0	0	0	0	0	0	0	0	0	0	0	0	0	0	0	0	0	0	0	0	0	0
1.29493695.A_C.clim-tmin3	1	29493695	A	C	0.0352697	INTERGENIC	clim-tmin3	AT1G78390	promoter	29492375	29493875	0	0	0	0	0	0	0	0	0	0	0	0	0	0	0	0	0	0	0	0	0	0	0	0	0	0	0	0	0	0	0	0	0	0	0	0	-1	0
1.19506585.C_T.clim-gs9	1	19506585	C	T	0.0179641	INTRON	clim-gs9	AT1G52360	terminator	19505809	19507309	0	0	0	0	0	0	0	0	0	0	0	0	0	0	0	0	0	0	0	0	0	0	0	0	0	0	0	0	0	0	0	0	0	0	0	0	0	0
1.7383569.G_A.clim-tmax3	1	7383569	G	A	0.066	INTERGENIC	clim-tmax3	AT1G21080	promoter	7382161	7383661	0	0	0	0	0	0	0	0	0	0	0	0	0	0	0	0	0	0	0	0	0	0	0	0	0	0	0	0	0	0	0	0	0	0	0	0	0	0
1.28048615.C_A.clim-gs9	1	28048615	C	A	0.0179641	INTERGENIC	clim-gs9	AT1G74660	promoter	28047789	28049289	0	0	0	0	0	0	0	0	0	0	0	0	0	0	0	0	0	0	0	0	0	0	0	0	0	0	0	0	0	0	0	0	0	0	0	0	0	0
1.1104450.C_T.clim-tmax1	1	1104450	C	T	0.0359281	INTERGENIC	clim-tmax1	AT1G04180	promoter	1103492	1104992	0	0	0	0	0	0	0	0	0	0	0	0	0	0	0	0	0	0	1	0	0	0	0	0	0	0	0	0	0	0	0	0	0	0	0	0	0	0
1.1064134.T_C.clim-tmax1	1	1064134	T	C	0.0359281	INTERGENIC	clim-tmax1	AT1G04110	promoter	1063309	1064809	0	0	0	0	0	0	0	0	0	0	0	0	0	0	0	0	0	0	0	0	0	0	0	0	0	0	0	0	0	0	0	0	0	0	0	0	0	0
1.1064659.T_G.clim-tmax1	1	1064659	T	G	0.0359281	UTR_3_PRIME	clim-tmax1	AT1G04110	promoter	1063309	1064809	0	0	0	0	0	0	0	0	0	0	0	0	0	0	0	0	0	0	0	0	0	0	0	0	0	0	0	0	0	0	0	0	0	0	0	0	0	0
1.8838865.T_C.clim-tmax6	1	8838865	T	C	0.0219561	INTRON	clim-tmax6	AT1G05933	promoter	8837444	8838944	0	0	0	0	0	0	0	0	0	0	0	0	0	0	0	0	0	0	0	0	0	0	0	0	0	0	0	0	0	0	0	0	0	0	0	0	0	0
1.7399129.A_T.clim-tmin11	1	7399129	A	T	0.0658683	UTR_3_PRIME	clim-tmin11	AT1G21130	terminator	7397813	7399313	0	0	0	0	0	0	0	0	0	0	0	0	0	0	0	0	0	0	0	0	0	0	0	0	0	0	0	0	0	0	0	0	0	0	0	0	0	0
1.1587785.C_A.clim-tmax2	1	1587785	C	A	0.0279441	INTERGENIC	clim-tmax2	AT1G05410	promoter	1587294	1588794	0	0	0	0	0	0	0	0	0	0	0	0	0	0	0	0	0	0	0	0	0	0	0	0	0	0	0	0	0	0	0	0	0	0	0	0	0	0
1.18638165.C_T.clim-tmin6	1	18638165	C	T	0.0159681	INTERGENIC	clim-tmin6	AT1G50310	terminator	18637949	18639449	0	0	0	0	0	0	0	0	0	0	0	0	0	0	0	0	0	0	0	0	0	0	0	0	0	0	0	0	0	0	0	0	0	0	0	0	0	0
1.19514016.T_G.clim-gs9	1	19514016	T	G	0.0179641	INTERGENIC	clim-gs9	AT1G52400	promoter	19513988	19515488	0	0	0	0	0	0	0	0	0	0	0	0	0	0	0	0	0	0	0	0	0	0	0	0	0	0	0	0	0	0	0	0	0	0	0	0	0	0
1.3898363.G_A.clim-tmax2	1	3898363	G	A	0.0159681	NON_SYNONYMOUS_CODING	clim-tmax2	AT1G11593	promoter	3897001	3898501	0	0	0	0	0	0	0	0	0	0	0	0	0	0	0	0	0	0	0	0	0	0	0	0	0	0	0	0	0	0	0	0	0	0	0	0	0	0
1.27757213.A_G.clim-bio9	1	27757213	A	G	0.014	INTERGENIC	clim-bio9	AT1G73820	promoter	27756963	27758463	0	0	0	0	0	0	0	0	0	0	0	0	0	0	0	0	0	0	0	0	0	0	0	0	0	0	0	0	0	0	0	0	0	0	0	0	0	0
1.23885297.G_A.clim-gs8	1	23885297	G	A	0.0219561	INTERGENIC	clim-gs8	AT1G64355	promoter	23884981	23886481	0	0	0	0	0	0	0	0	0	0	0	0	0	0	0	0	0	0	0	0	0	0	0	0	0	0	0	0	0	0	0	0	0	0	0	0	0	1
1.20948685.T_G.clim-gs9	1	20948685	T	G	0.0159681	INTRON	clim-gs9	AT1G08087	terminator	20948469	20949969	0	0	0	0	0	0	0	0	0	0	0	0	0	0	0	0	0	0	0	0	0	0	0	0	0	0	0	0	0	0	0	0	0	0	0	0	0	0
1.20948664.T_A.clim-gs9	1	20948664	T	A	0.0159681	INTRON	clim-gs9	AT1G08087	terminator	20948469	20949969	0	0	0	0	0	0	0	0	0	0	0	0	0	0	0	0	0	0	0	0	0	0	0	0	0	0	0	0	0	0	0	0	0	0	0	0	0	0
1.13107428.A_T.Leaf roll 22	1	13107428	A	T	0.0681818	INTERGENIC	Leaf roll 22	AT1G06907	terminator	13106633	13108133	0	0	0	0	0	0	0	0	0	0	0	0	0	0	0	0	0	0	0	0	0	0	0	0	0	0	0	0	0	0	0	0	0	0	0	0	1	0
1.3856591.T_C.clim-tmax2	1	3856591	T	C	0.0139721	INTERGENIC	clim-tmax2	AT1G11460	promoter	3855941	3857441	0	0	0	0	0	0	0	0	0	0	0	0	0	0	0	0	0	0	0	0	0	0	0	0	0	0	0	0	0	0	0	0	0	0	0	0	0	0
1.3659662.G_C.clim-tmax2	1	3659662	G	C	0.0139721	INTRON	clim-tmax2	AT1G10950	promoter	3658203	3659703	0	0	0	0	0	0	0	0	0	0	0	0	0	0	0	0	0	0	0	0	0	0	0	0	0	0	0	0	0	0	0	0	0	0	0	0	0	0
1.3859792.G_T.clim-tmax2	1	3859792	G	T	0.0139721	UTR_3_PRIME	clim-tmax2	AT1G11460	terminator	3858965	3860465	0	0	0	0	0	0	0	0	0	0	0	0	0	0	0	0	0	0	0	0	0	0	0	0	0	0	0	0	0	0	0	0	0	0	0	0	0	0
1.3914950.C_T.clim-tmax2	1	3914950	C	T	0.0139721	NON_SYNONYMOUS_CODING	clim-tmax2	AT1G11650	promoter	3913773	3915273	0	0	0	0	0	0	0	0	0	0	0	0	0	0	0	0	0	0	0	0	0	0	0	0	0	-1	0	0	0	0	0	0	0	0	0	0	0	0
1.1534870.T_A.clim-tmax2	1	1534870	T	A	0.0239521	INTERGENIC	clim-tmax2	AT1G05270	promoter	1534267	1535767	0	0	0	0	0	0	0	0	0	0	0	0	0	0	0	0	0	0	0	0	0	0	0	0	0	0	0	0	0	0	0	0	0	0	0	0	0	0
1.1640533.C_A.clim-tmax2	1	1640533	C	A	0.0239521	NON_SYNONYMOUS_CODING	clim-tmax2	AT1G05540	terminator	1640379	1641879	0	0	0	0	0	0	0	0	0	0	0	0	0	0	0	0	0	0	0	0	0	0	0	0	0	0	0	0	0	0	0	0	0	0	0	0	0	0
1.1648211.G_A.clim-tmax2	1	1648211	G	A	0.0239521	INTRON	clim-tmax2	AT1G05560	promoter	1646935	1648435	0	0	0	0	0	0	0	0	0	0	0	0	0	0	0	0	0	0	0	0	0	0	0	0	0	0	0	0	0	0	0	0	0	0	0	0	0	0
1.1681385.A_G.clim-tmax2	1	1681385	A	G	0.0239521	INTRON	clim-tmax2	AT1G05620	terminator	1681210	1682710	0	0	0	0	0	0	0	0	0	0	0	0	0	0	0	0	0	0	0	0	0	0	0	0	0	0	0	0	0	0	0	0	0	0	0	0	0	0
1.1702332.C_T.clim-tmax2	1	1702332	C	T	0.0239521	SYNONYMOUS_CODING	clim-tmax2	AT1G05680	terminator	1702001	1703501	0	0	0	0	0	0	0	0	0	0	0	0	0	0	0	0	0	0	0	0	0	0	0	0	0	0	0	0	0	0	0	0	0	0	0	0	0	0
1.2107524.C_T.clim-tmax2	1	2107524	C	T	0.0239521	INTERGENIC	clim-tmax2	AT1G06850	terminator	2106249	2107749	0	0	0	0	0	0	0	0	0	0	0	0	0	0	0	0	0	0	0	0	0	0	0	0	0	0	0	0	0	0	0	0	0	0	0	0	0	0
1.2149502.G_T.clim-tmax2	1	2149502	G	T	0.0239521	INTRON	clim-tmax2	AT1G07000	terminator	2149157	2150657	0	0	0	0	0	0	0	0	0	0	0	0	0	0	0	0	0	0	0	0	0	0	0	0	0	0	0	0	0	0	0	0	0	0	0	0	0	0
1.2244602.G_A.clim-tmax2	1	2244602	G	A	0.0239521	INTERGENIC	clim-tmax2	AT1G07290	promoter	2244492	2245992	0	1	0	0	0	0	0	0	0	0	0	0	0	0	0	0	0	0	0	0	0	0	0	0	0	0	0	0	0	-1	0	0	0	0	0	0	-1	0
1.3107099.C_G.clim-tmax2	1	3107099	C	G	0.0239521	INTRON	clim-tmax2	AT1G09580	terminator	3105866	3107366	0	0	0	0	0	0	0	0	0	0	0	0	0	0	0	0	0	0	0	0	0	0	0	0	0	0	0	0	0	0	0	0	0	0	0	0	0	0
1.3119209.C_T.clim-tmax2	1	3119209	C	T	0.0239521	INTRON	clim-tmax2	AT1G09640	promoter	3118738	3120238	0	0	0	0	0	0	0	0	0	0	0	0	0	0	0	0	0	0	0	0	0	0	0	0	0	0	0	0	0	0	0	0	0	0	0	0	0	0
1.3263542.T_A.clim-tmax2	1	3263542	T	A	0.0239521	UTR_5_PRIME	clim-tmax2	AT1G09995	promoter	3263142	3264642	0	0	0	0	0	0	0	0	0	0	0	0	0	0	0	0	0	0	0	0	0	0	0	0	0	0	0	0	0	0	0	0	0	0	0	0	0	0
1.3284419.C_A.clim-tmax2	1	3284419	C	A	0.0239521	UTR_5_PRIME	clim-tmax2	AT1G10050	terminator	3283131	3284631	0	0	0	0	0	0	0	0	0	0	0	0	0	0	0	0	0	0	0	0	0	0	0	0	0	0	0	0	0	0	0	0	0	0	0	0	0	0
1.3291353.T_C.clim-tmax2	1	3291353	T	C	0.0239521	INTRON	clim-tmax2	AT1G10070	terminator	3289971	3291471	0	0	0	0	0	0	0	0	0	0	0	0	0	0	0	0	0	0	0	0	0	0	0	0	0	0	0	0	0	0	0	0	0	0	0	0	0	0
1.3295902.C_T.clim-tmax2	1	3295902	C	T	0.0239521	INTRON	clim-tmax2	AT1G10095	terminator	3295515	3297015	0	0	0	0	0	0	0	0	0	0	0	0	0	0	0	0	0	0	0	0	0	0	0	0	0	0	0	0	0	0	0	0	0	0	0	0	0	0
1.3306242.G_A.clim-tmax2	1	3306242	G	A	0.0239521	UTR_5_PRIME	clim-tmax2	AT1G04773	promoter	3304947	3306447	0	0	0	0	0	0	0	0	0	0	0	0	0	0	0	0	0	0	0	0	0	0	0	0	0	0	0	0	0	0	0	0	0	0	0	0	0	0
1.3424670.T_C.clim-tmax2	1	3424670	T	C	0.0239521	INTRON	clim-tmax2	AT1G10417	terminator	3423185	3424685	0	0	0	0	0	0	0	0	0	0	0	0	0	0	0	0	0	0	0	0	0	0	0	0	0	0	0	0	0	0	0	0	0	0	0	0	0	0
1.3427826.T_A.clim-tmax2	1	3427826	T	A	0.0239521	INTERGENIC	clim-tmax2	AT1G10430	terminator	3427477	3428977	0	0	0	0	0	0	0	0	0	0	0	0	0	0	0	0	0	0	0	0	0	0	0	0	0	0	0	0	0	0	0	0	0	0	0	0	0	0
1.3451689.A_T.clim-tmax2	1	3451689	A	T	0.0239521	INTERGENIC	clim-tmax2	AT1G10480	terminator	3450726	3452226	0	0	0	0	0	0	0	0	0	0	0	0	0	0	0	0	0	0	0	0	0	0	0	0	0	0	0	0	0	0	0	0	0	0	0	0	0	0
1.3459488.A_C.clim-tmax2	1	3459488	A	C	0.0239521	INTRON	clim-tmax2	AT1G10500	terminator	3458999	3460499	0	0	0	0	0	0	0	0	0	0	0	0	0	0	0	0	0	0	0	0	0	0	0	0	0	0	0	0	0	0	0	0	0	0	0	0	0	0
1.3722229.T_G.clim-tmax2	1	3722229	T	G	0.0239521	INTERGENIC	clim-tmax2	AT1G11130	promoter	3721707	3723207	0	0	0	0	0	0	0	0	0	0	0	0	0	0	0	0	0	0	0	0	0	0	0	0	0	0	0	0	0	0	0	0	0	0	0	0	0	0
1.3997980.C_A.clim-tmax2	1	3997980	C	A	0.0239521	INTERGENIC	clim-tmax2	AT1G11840	terminator	3997465	3998965	0	0	0	0	0	0	0	0	0	0	0	0	0	0	0	0	0	0	0	0	0	0	0	0	0	0	0	0	0	0	0	0	0	0	0	0	0	0
1.4020651.A_G.clim-tmax2	1	4020651	A	G	0.0239521	INTRON	clim-tmax2	AT1G11910	promoter	4020543	4022043	0	0	0	0	0	0	0	0	0	0	0	0	0	0	0	0	0	0	0	0	0	0	0	0	0	0	0	0	0	0	0	0	0	0	0	0	0	0
1.4121389.G_T.clim-tmax2	1	4121389	G	T	0.0239521	NON_SYNONYMOUS_CODING	clim-tmax2	AT1G12130	terminator	4120459	4121959	0	0	0	0	0	0	0	0	0	0	0	0	0	0	0	0	0	0	0	0	0	0	0	0	0	0	0	0	0	0	0	0	0	0	0	0	0	0
1.4128719.C_G.clim-tmax2	1	4128719	C	G	0.0239521	NON_SYNONYMOUS_CODING	clim-tmax2	AT1G12170	terminator	4127606	4129106	0	0	0	0	0	0	0	0	0	0	0	0	0	0	0	0	0	0	0	0	0	0	0	0	0	0	0	0	0	0	0	0	0	0	0	0	0	0
1.4153808.G_A.clim-tmax2	1	4153808	G	A	0.0239521	NON_SYNONYMOUS_CODING	clim-tmax2	AT1G12240	promoter	4152640	4154140	0	0	0	0	0	0	0	0	0	0	0	0	0	0	0	0	0	0	0	0	0	0	0	0	0	0	0	0	0	0	0	0	0	0	0	0	0	0
1.4200625.C_T.clim-tmax2	1	4200625	C	T	0.0239521	NON_SYNONYMOUS_CODING	clim-tmax2	AT1G12350	terminator	4200349	4201849	0	0	0	0	0	0	0	0	0	0	0	0	0	0	0	0	0	0	0	0	0	0	0	0	0	0	0	0	0	0	0	0	0	0	0	0	0	0
1.4200968.G_A.clim-tmax2	1	4200968	G	A	0.0239521	UTR_5_PRIME	clim-tmax2	AT1G12350	terminator	4200349	4201849	0	0	0	0	0	0	0	0	0	0	0	0	0	0	0	0	0	0	0	0	0	0	0	0	0	0	0	0	0	0	0	0	0	0	0	0	0	0
1.4547521.G_A.clim-tmax2	1	4547521	G	A	0.0239521	UTR_5_PRIME	clim-tmax2	AT1G13270	terminator	4546873	4548373	0	0	0	0	0	0	0	0	0	0	0	0	0	0	0	0	0	0	0	0	0	0	0	0	0	0	0	0	0	0	0	0	0	0	0	0	0	0
1.1331830.A_T.clim-tmax2	1	1331830	A	T	0.0239521	UTR_3_PRIME	clim-tmax2	AT1G04730	promoter	1330669	1332169	0	0	0	0	0	0	0	0	0	0	1	0	0	0	0	0	0	0	0	0	0	0	-1	0	0	0	0	0	0	0	0	0	0	0	0	0	0	0
1.1432982.T_A.clim-tmax2	1	1432982	T	A	0.0239521	INTERGENIC	clim-tmax2	AT1G05010	promoter	1432510	1434010	0	0	0	0	0	0	0	0	0	0	0	0	0	0	0	0	0	0	0	0	0	0	0	0	0	0	0	0	0	0	0	0	0	0	0	0	0	0
1.1490174.A_G.clim-tmax2	1	1490174	A	G	0.0239521	INTRON	clim-tmax2	AT1G05170	terminator	1489973	1491473	0	0	0	0	0	0	0	0	0	0	0	0	0	0	0	0	0	0	0	0	0	0	0	0	0	0	0	0	0	0	0	0	0	0	0	0	0	0
1.3112653.A_C.clim-tmax2	1	3112653	A	C	0.0239521	UTR_3_PRIME	clim-tmax2	AT1G09620	terminator	3111777	3113277	0	0	0	0	0	0	0	0	0	0	0	0	0	0	0	0	0	0	0	0	0	0	0	0	0	0	0	0	0	0	0	0	0	0	0	0	0	1
1.3154398.G_A.clim-tmax2	1	3154398	G	A	0.0239521	INTERGENIC	clim-tmax2	AT1G09730	promoter	3153904	3155404	0	0	0	0	0	0	0	0	0	0	0	0	0	0	0	0	0	0	0	0	0	0	0	0	0	0	0	0	0	0	0	0	0	0	0	0	0	0
1.4591204.G_A.clim-tmax2	1	4591204	G	A	0.0239521	INTERGENIC	clim-tmax2	AT1G13380	promoter	4590001	4591501	0	0	0	0	0	0	0	0	0	0	0	0	0	0	0	0	0	0	0	0	0	0	0	0	0	0	0	0	0	0	0	0	0	0	0	0	0	0
1.4600601.A_G.clim-tmax2	1	4600601	A	G	0.0239521	INTERGENIC	clim-tmax2	AT1G13410	promoter	4600234	4601734	0	0	0	0	0	0	0	0	0	0	0	0	0	0	0	0	0	0	0	0	0	0	0	0	0	0	0	0	0	0	0	0	0	0	0	0	0	0
1.1422194.G_A.clim-tmax2	1	1422194	G	A	0.0239521	INTERGENIC	clim-tmax2	AT1G04990	promoter	1421363	1422863	0	0	0	0	0	0	0	0	0	0	0	0	0	0	0	0	0	0	0	0	0	0	0	0	0	0	0	1	0	0	0	0	0	0	0	0	0	0
1.1494870.G_A.clim-tmax2	1	1494870	G	A	0.0239521	INTERGENIC	clim-tmax2	AT1G05170	promoter	1493748	1495248	0	0	0	0	0	0	0	0	0	0	0	0	0	0	0	0	0	0	0	0	0	0	0	0	0	0	0	0	0	0	0	0	0	0	0	0	0	0
1.3092306.T_G.clim-tmax2	1	3092306	T	G	0.0239521	UTR_5_PRIME	clim-tmax2	AT1G09550	promoter	3091827	3093327	0	0	0	0	0	0	0	0	0	0	0	0	0	0	0	0	0	0	0	0	0	0	0	0	0	0	0	0	0	0	0	0	0	0	0	0	0	0
1.1554028.C_G.clim-tmax2	1	1554028	C	G	0.0239521	INTRON	clim-tmax2	AT1G05320	promoter	1552567	1554067	0	0	0	0	0	0	0	0	0	0	0	0	0	0	0	0	0	0	0	0	0	0	0	0	0	0	0	0	0	0	0	0	0	0	0	0	0	0
1.1648217.A_G.clim-tmax2	1	1648217	A	G	0.0239521	INTRON	clim-tmax2	AT1G05560	promoter	1646935	1648435	0	0	0	0	0	0	0	0	0	0	0	0	0	0	0	0	0	0	0	0	0	0	0	0	0	0	0	0	0	0	0	0	0	0	0	0	0	0
1.1660438.T_G.clim-tmax2	1	1660438	T	G	0.0239521	INTERGENIC	clim-tmax2	AT1G05570	promoter	1659111	1660611	0	0	0	0	0	0	0	0	0	0	0	0	0	0	0	0	0	0	0	0	0	0	0	0	0	0	0	0	0	0	0	0	0	0	0	0	0	0
1.1720825.A_G.clim-tmax2	1	1720825	A	G	0.0239521	INTRON	clim-tmax2	AT1G05740	terminator	1720809	1722309	0	0	0	0	0	0	0	0	0	0	0	0	0	0	0	0	0	0	0	0	0	0	0	0	0	0	0	0	0	0	0	0	0	0	0	0	0	0
1.1726788.A_G.clim-tmax2	1	1726788	A	G	0.0239521	NON_SYNONYMOUS_CODING	clim-tmax2	AT1G05780	promoter	1725557	1727057	0	0	0	0	0	0	0	0	0	0	0	0	0	0	0	0	0	0	0	0	0	0	0	0	0	0	0	0	0	0	0	0	0	0	0	0	0	0
1.1906982.G_A.clim-tmax2	1	1906982	G	A	0.0239521	UTR_5_PRIME	clim-tmax2	AT1G06225	terminator	1905798	1907298	0	0	0	0	0	0	0	0	0	0	0	0	0	0	0	0	0	0	0	0	0	0	0	0	0	0	0	0	0	0	0	0	0	0	0	0	0	0
1.1946136.G_T.clim-tmax2	1	1946136	G	T	0.0239521	INTERGENIC	clim-tmax2	AT1G06380	terminator	1945803	1947303	0	0	0	0	0	0	0	0	0	0	0	0	0	0	0	0	0	0	0	0	0	0	0	0	0	0	0	0	0	0	0	0	0	0	0	0	0	0
1.2007975.C_T.clim-tmax2	1	2007975	C	T	0.0239521	INTRON	clim-tmax2	AT1G06560	promoter	2006614	2008114	0	0	0	0	0	0	0	0	0	0	0	0	0	0	0	0	0	0	0	0	0	-1	0	0	0	0	0	0	0	0	0	0	0	0	0	0	0	0
1.2015408.C_T.clim-tmax2	1	2015408	C	T	0.0239521	NON_SYNONYMOUS_CODING	clim-tmax2	AT1G06590	terminator	2015305	2016805	0	0	0	0	0	0	0	0	0	0	0	0	0	0	0	0	0	0	0	0	0	0	0	0	0	0	0	0	0	0	0	0	0	0	0	0	0	0
1.2055192.G_C.clim-tmax2	1	2055192	G	C	0.0239521	UTR_5_PRIME	clim-tmax2	AT1G06700	promoter	2055048	2056548	0	0	0	0	0	0	0	0	0	0	0	0	0	0	0	0	0	0	0	0	0	0	0	0	0	0	0	0	0	0	0	0	0	0	0	0	0	0
1.2070997.G_A.clim-tmax2	1	2070997	G	A	0.0239521	INTRON	clim-tmax2	AT1G06740	promoter	2069736	2071236	0	0	-1	0	0	0	0	0	0	0	0	0	0	0	0	0	0	0	0	0	0	0	0	0	0	0	0	0	0	0	0	0	0	0	0	0	0	0
1.2161491.T_C.clim-tmax2	1	2161491	T	C	0.0239521	NON_SYNONYMOUS_CODING	clim-tmax2	AT1G07030	promoter	2160318	2161818	0	0	0	0	0	0	0	0	0	0	0	0	0	0	0	0	0	0	0	0	0	0	0	0	0	0	0	0	0	0	0	0	0	0	0	0	0	0
1.2165242.T_A.clim-tmax2	1	2165242	T	A	0.0239521	INTERGENIC	clim-tmax2	AT1G07050	promoter	2164761	2166261	0	0	0	0	0	0	0	0	0	0	0	0	0	0	0	0	0	0	0	0	0	0	0	0	0	0	0	0	1	0	0	0	0	0	0	0	0	0
1.2175732.A_G.clim-tmax2	1	2175732	A	G	0.0239521	INTERGENIC	clim-tmax2	AT1G07090	promoter	2174538	2176038	0	0	0	0	0	0	0	0	0	0	0	0	0	0	0	0	0	0	0	0	0	0	0	0	0	0	0	0	1	0	0	0	0	0	0	0	0	0
1.2191707.T_G.clim-tmax2	1	2191707	T	G	0.0239521	INTERGENIC	clim-tmax2	AT1G07140	terminator	2190678	2192178	0	0	0	0	0	0	0	0	0	0	0	0	0	0	0	0	0	0	0	0	0	0	0	0	0	0	0	0	0	0	0	0	0	0	0	0	0	0
1.3092183.C_T.clim-tmax2	1	3092183	C	T	0.0239521	SYNONYMOUS_CODING	clim-tmax2	AT1G09550	promoter	3091827	3093327	0	0	0	0	0	0	0	0	0	0	0	0	0	0	0	0	0	0	0	0	0	0	0	0	0	0	0	0	0	0	0	0	0	0	0	0	0	0
1.3251970.C_T.clim-tmax2	1	3251970	C	T	0.0239521	INTERGENIC	clim-tmax2	AT1G09970	promoter	3251097	3252597	0	0	0	0	0	0	0	0	0	0	0	0	0	0	0	0	0	0	0	0	0	0	0	0	-1	0	0	0	-1	0	0	0	0	0	0	0	0	0
1.3268913.G_A.clim-tmax2	1	3268913	G	A	0.0239521	INTERGENIC	clim-tmax2	AT1G10010	terminator	3268323	3269823	0	0	0	0	0	0	0	0	0	0	0	0	0	0	0	0	0	0	0	0	0	0	0	0	0	0	0	0	0	0	0	0	0	0	0	0	0	0
1.3302458.A_G.clim-tmax2	1	3302458	A	G	0.0239521	INTERGENIC	clim-tmax2	AT1G10110	promoter	3301563	3303063	0	0	0	0	0	0	0	0	0	0	0	0	0	0	0	0	0	0	0	0	0	0	0	0	0	0	0	0	0	0	0	0	0	0	0	0	0	0
1.3323822.A_G.clim-tmax2	1	3323822	A	G	0.0239521	INTERGENIC	clim-tmax2	AT1G10140	promoter	3323235	3324735	0	0	0	0	0	0	0	0	0	0	0	0	0	0	0	0	0	0	0	0	0	0	0	0	0	0	0	0	0	0	0	0	0	0	0	0	0	0
1.3415321.C_T.clim-tmax2	1	3415321	C	T	0.0239521	NON_SYNONYMOUS_CODING	clim-tmax2	AT1G10400	terminator	3413822	3415322	0	0	0	0	0	0	0	0	0	0	0	0	0	0	0	0	0	0	0	0	0	0	0	0	0	0	0	0	0	0	0	0	0	0	0	0	0	0
1.3423236.T_A.clim-tmax2	1	3423236	T	A	0.0239521	INTERGENIC	clim-tmax2	AT1G04793	terminator	3422558	3424058	0	0	0	0	0	0	0	0	0	0	0	0	0	0	0	0	0	0	0	0	0	0	0	0	0	0	0	1	0	0	0	0	0	0	0	0	0	0
1.3478091.A_T.clim-tmax2	1	3478091	A	T	0.0239521	INTERGENIC	clim-tmax2	AT1G10540	promoter	3477528	3479028	0	0	0	0	0	0	0	0	0	0	0	0	0	0	0	0	0	0	0	0	0	0	0	0	0	0	0	0	0	1	0	0	0	0	0	0	0	0
1.4508902.C_T.clim-tmax2	1	4508902	C	T	0.0239521	INTERGENIC	clim-tmax2	AT1G13210	terminator	4507905	4509405	0	0	0	0	0	0	0	0	0	0	0	0	0	0	0	0	0	0	0	0	0	0	0	0	0	0	0	0	0	0	0	0	0	0	0	0	0	0
1.4526205.A_C.clim-tmax2	1	4526205	A	C	0.0239521	INTERGENIC	clim-tmax2	AT1G13245	promoter	4525704	4527204	0	0	0	0	0	0	0	0	0	0	0	0	0	0	0	0	0	0	0	0	0	0	0	0	0	0	0	0	0	0	0	0	0	0	0	0	0	0
1.4560468.T_C.clim-tmax2	1	4560468	T	C	0.0239521	INTERGENIC	clim-tmax2	AT1G13310	terminator	4560027	4561527	0	0	0	0	0	0	0	0	0	0	0	0	0	0	0	0	0	0	0	0	0	1	0	0	0	0	0	0	0	0	0	0	0	0	0	0	-1	0
1.4612457.C_T.clim-tmax2	1	4612457	C	T	0.0239521	.	clim-tmax2	AT1G13450	terminator	4611730	4613230	0	0	0	0	0	0	0	0	0	0	0	0	0	0	0	0	0	0	0	0	0	0	0	0	0	0	0	0	0	0	0	0	0	0	0	0	0	0
1.4673518.G_A.clim-tmax2	1	4673518	G	A	0.0239521	INTERGENIC	clim-tmax2	AT1G13635	promoter	4673151	4674651	0	0	0	0	0	0	0	0	0	0	0	0	0	0	0	0	0	0	0	0	0	0	0	0	0	0	0	0	0	0	0	0	0	0	0	0	0	0
1.4674172.C_G.clim-tmax2	1	4674172	C	G	0.0239521	UTR_5_PRIME	clim-tmax2	AT1G13635	promoter	4673151	4674651	0	0	0	0	0	0	0	0	0	0	0	0	0	0	0	0	0	0	0	0	0	0	0	0	0	0	0	0	0	0	0	0	0	0	0	0	0	0
1.4971017.C_T.clim-tmax2	1	4971017	C	T	0.0239521	UTR_3_PRIME	clim-tmax2	AT1G14520	promoter	4969811	4971311	0	0	0	0	0	0	0	0	0	0	0	0	0	0	0	0	0	0	0	0	0	0	0	0	0	0	0	0	0	0	0	0	0	0	0	0	0	0
1.4975809.G_A.clim-tmax2	1	4975809	G	A	0.0239521	INTERGENIC	clim-tmax2	AT1G14540	promoter	4975205	4976705	0	0	-1	0	0	0	0	0	0	0	0	0	0	0	0	0	0	0	0	0	0	0	0	0	0	0	0	0	0	0	0	0	0	0	0	0	0	0
1.1479390.G_C.clim-tmax2	1	1479390	G	C	0.0239521	INTERGENIC	clim-tmax2	AT1G05136	promoter	1477922	1479422	0	0	0	0	0	0	0	0	0	0	0	0	0	0	0	0	0	0	0	0	0	0	0	0	0	0	0	0	0	0	0	0	0	0	0	0	0	0
1.1565215.C_T.clim-tmax2	1	1565215	C	T	0.0239521	NON_SYNONYMOUS_CODING	clim-tmax2	AT1G05350	promoter	1563909	1565409	0	0	0	0	0	0	0	0	0	0	0	0	0	0	0	0	0	0	0	0	0	0	0	0	0	0	0	0	0	0	0	0	0	0	0	0	0	0
1.1638094.A_T.clim-tmax2	1	1638094	A	T	0.0239521	INTERGENIC	clim-tmax2	AT1G05530	promoter	1637414	1638914	0	0	0	0	0	0	0	0	0	0	0	0	0	0	0	0	0	0	0	0	0	0	0	0	0	0	0	0	0	0	0	0	0	0	0	0	0	0
1.1727669.A_G.clim-tmax2	1	1727669	A	G	0.0239521	INTRON	clim-tmax2	AT1G05783	terminator	1727657	1729157	0	0	0	0	0	0	0	0	0	0	0	0	0	0	0	0	0	0	0	0	0	0	0	0	0	0	0	0	0	0	0	0	0	0	0	0	0	0
1.1852353.C_A.clim-tmax2	1	1852353	C	A	0.0239521	NON_SYNONYMOUS_CODING	clim-tmax2	AT1G06110	terminator	1852058	1853558	0	0	0	0	0	0	0	0	0	0	0	0	0	0	0	0	0	0	0	0	0	0	0	0	0	0	0	0	0	0	0	0	0	0	0	0	0	0
1.2052778.G_A.clim-tmax2	1	2052778	G	A	0.0239521	NON_SYNONYMOUS_CODING	clim-tmax2	AT1G06690	promoter	2051670	2053170	0	0	0	0	0	0	0	0	0	0	0	0	0	0	0	0	0	0	0	0	0	0	-1	0	0	0	0	0	0	0	0	0	0	0	0	0	0	0
1.2176960.A_T.clim-tmax2	1	2176960	A	T	0.0239521	INTERGENIC	clim-tmax2	AT1G07100	promoter	2176884	2178384	0	0	0	0	0	0	0	0	0	0	0	0	0	0	0	0	0	0	0	0	0	0	0	0	0	0	0	0	0	0	0	0	0	0	0	0	0	0
1.2189399.G_T.clim-tmax2	1	2189399	G	T	0.0239521	INTERGENIC	clim-tmax2	AT1G07130	terminator	2188233	2189733	0	0	0	0	0	0	0	0	0	0	0	0	0	0	0	0	0	0	0	0	0	0	0	0	0	0	0	0	0	0	0	0	0	0	0	0	0	0
1.2191624.T_A.clim-tmax2	1	2191624	T	A	0.0239521	INTERGENIC	clim-tmax2	AT1G07140	terminator	2190678	2192178	0	0	0	0	0	0	0	0	0	0	0	0	0	0	0	0	0	0	0	0	0	0	0	0	0	0	0	0	0	0	0	0	0	0	0	0	0	0
1.2313634.T_C.clim-tmax2	1	2313634	T	C	0.0239521	UTR_3_PRIME	clim-tmax2	AT1G07530	terminator	2312580	2314080	0	0	0	0	0	0	0	0	0	0	0	0	0	0	0	0	0	0	0	0	0	0	0	0	0	0	0	0	0	0	0	0	0	0	0	0	0	0
1.3092343.T_C.clim-tmax2	1	3092343	T	C	0.0239521	INTERGENIC	clim-tmax2	AT1G09550	promoter	3091827	3093327	0	0	0	0	0	0	0	0	0	0	0	0	0	0	0	0	0	0	0	0	0	0	0	0	0	0	0	0	0	0	0	0	0	0	0	0	0	0
1.3251346.C_T.clim-tmax2	1	3251346	C	T	0.0239521	INTERGENIC	clim-tmax2	AT1G09970	promoter	3251097	3252597	0	0	0	0	0	0	0	0	0	0	0	0	0	0	0	0	0	0	0	0	0	0	0	0	0	0	0	0	0	0	0	0	0	0	0	0	0	0
1.3268528.G_C.clim-tmax2	1	3268528	G	C	0.0239521	SYNONYMOUS_CODING	clim-tmax2	AT1G10010	terminator	3268323	3269823	0	0	0	0	0	0	0	0	0	0	0	0	0	0	0	0	0	0	0	0	0	0	0	0	0	0	0	0	0	0	0	0	0	0	0	0	0	0
1.3405335.A_T.clim-tmax2	1	3405335	A	T	0.0239521	NON_SYNONYMOUS_CODING	clim-tmax2	AT1G04787	promoter	3405208	3406708	0	0	0	0	0	0	0	0	0	0	0	0	0	0	0	0	0	0	0	0	0	0	0	0	0	0	0	0	0	0	0	0	0	0	0	0	0	0
1.3424070.C_G.clim-tmax2	1	3424070	C	G	0.0239521	INTERGENIC	clim-tmax2	AT1G10417	terminator	3423185	3424685	0	0	0	0	0	0	0	0	0	0	0	0	0	0	0	0	0	0	0	0	0	0	0	0	0	0	0	0	0	0	0	0	0	0	0	0	0	0
1.3427699.A_G.clim-tmax2	1	3427699	A	G	0.0239521	INTERGENIC	clim-tmax2	AT1G10430	terminator	3427477	3428977	0	0	0	0	0	0	0	0	0	0	0	0	0	0	0	0	0	0	0	0	0	0	0	0	0	0	0	0	0	0	0	0	0	0	0	0	0	0
1.3430951.C_T.clim-tmax2	1	3430951	C	T	0.0239521	INTERGENIC	clim-tmax2	AT1G10430	promoter	3430424	3431924	0	0	0	0	0	0	0	0	0	0	0	0	0	0	0	0	0	0	0	0	0	0	0	0	0	0	0	0	0	0	0	0	0	0	0	0	0	0
1.3550139.A_T.clim-tmax2	1	3550139	A	T	0.0239521	UTR_3_PRIME	clim-tmax2	AT1G10690	terminator	3548919	3550419	0	0	0	0	0	0	0	0	0	0	0	0	0	0	0	0	0	0	0	0	0	0	0	0	0	0	0	0	0	0	0	0	0	0	0	0	0	0
1.3820674.A_G.clim-tmax2	1	3820674	A	G	0.0239521	NON_SYNONYMOUS_CODING	clim-tmax2	AT1G11360	terminator	3820105	3821605	0	0	0	0	0	0	0	0	0	0	0	0	0	0	0	0	0	0	0	0	0	0	0	0	0	0	0	0	0	0	0	0	0	0	0	0	0	0
1.4039929.T_A.clim-tmax2	1	4039929	T	A	0.0239521	NON_SYNONYMOUS_CODING	clim-tmax2	AT1G11960	terminator	4038565	4040065	0	0	0	0	0	0	0	0	0	0	0	0	0	0	0	0	0	0	0	0	0	0	0	0	0	0	0	0	0	0	0	0	0	0	0	0	0	0
1.4188175.G_A.clim-tmax2	1	4188175	G	A	0.0239521	INTERGENIC	clim-tmax2	AT1G12310	promoter	4187733	4189233	0	0	0	0	0	0	0	0	0	0	0	0	0	0	0	0	0	0	0	0	0	0	0	0	0	0	0	0	0	0	0	0	0	0	0	0	0	0
1.4525739.C_T.clim-tmax2	1	4525739	C	T	0.0239521	UTR_3_PRIME	clim-tmax2	AT1G13245	promoter	4525704	4527204	0	0	0	0	0	0	0	0	0	0	0	0	0	0	0	0	0	0	0	0	0	0	0	0	0	0	0	0	0	0	0	0	0	0	0	0	0	0
1.4526077.G_T.clim-tmax2	1	4526077	G	T	0.0239521	INTERGENIC	clim-tmax2	AT1G13245	promoter	4525704	4527204	0	0	0	0	0	0	0	0	0	0	0	0	0	0	0	0	0	0	0	0	0	0	0	0	0	0	0	0	0	0	0	0	0	0	0	0	0	0
1.4658233.C_T.clim-tmax2	1	4658233	C	T	0.0239521	INTERGENIC	clim-tmax2	AT1G13605	promoter	4657537	4659037	0	0	0	0	0	0	0	0	0	0	0	0	0	0	0	0	0	0	0	0	0	0	0	0	0	0	0	0	0	0	0	0	0	0	0	0	0	0
1.5000898.T_A.clim-tmax2	1	5000898	T	A	0.0239521	INTERGENIC	clim-tmax2	AT1G14590	promoter	5000210	5001710	0	0	0	0	0	0	0	0	0	0	0	0	0	0	0	0	0	0	0	0	0	0	0	0	0	0	0	0	0	0	0	0	0	0	0	0	-1	0
1.1343774.A_C.clim-tmax2	1	1343774	A	C	0.0239521	INTERGENIC	clim-tmax2	AT1G04780	promoter	1343293	1344793	0	0	0	0	0	0	0	0	0	0	0	0	0	0	0	0	0	0	0	0	0	0	0	0	0	0	0	0	0	0	0	0	0	0	0	0	0	0
1.1359264.G_A.clim-tmax2	1	1359264	G	A	0.0239521	INTRON	clim-tmax2	AT1G04820	promoter	1358047	1359547	0	0	0	0	0	0	0	0	0	0	0	0	0	0	0	0	0	0	0	0	0	0	0	0	0	0	0	0	0	1	0	0	0	0	0	0	0	0
1.1382825.G_A.clim-tmax2	1	1382825	G	A	0.0239521	INTERGENIC	clim-tmax2	AT1G04890	promoter	1382099	1383599	0	0	0	0	0	0	0	0	0	0	0	0	0	0	0	0	0	0	0	0	0	0	0	0	0	0	0	0	0	0	0	0	0	0	0	0	0	0
1.1509161.T_C.clim-tmax2	1	1509161	T	C	0.0239521	UTR_3_PRIME	clim-tmax2	AT1G05200	terminator	1508652	1510152	0	0	0	0	0	0	0	0	0	0	0	0	0	0	0	0	0	0	0	0	0	0	0	0	0	0	0	0	0	0	0	0	0	0	0	0	0	0
1.1564581.C_T.clim-tmax2	1	1564581	C	T	0.0239521	INTERGENIC	clim-tmax2	AT1G05350	promoter	1563909	1565409	0	0	0	0	0	0	0	0	0	0	0	0	0	0	0	0	0	0	0	0	0	0	0	0	0	0	0	0	0	0	0	0	0	0	0	0	0	0
1.1779535.T_C.clim-tmax2	1	1779535	T	C	0.0239521	UTR_5_PRIME	clim-tmax2	AT1G05880	terminator	1778053	1779553	0	0	0	0	0	0	0	0	0	0	0	0	0	0	0	0	0	0	0	0	0	0	0	0	0	0	0	0	0	0	0	0	0	0	0	0	0	0
1.1958925.T_A.clim-tmax2	1	1958925	T	A	0.0239521	UTR_5_PRIME	clim-tmax2	AT1G06420	promoter	1957877	1959377	0	0	0	0	0	0	0	0	0	0	0	0	0	0	0	0	0	0	0	0	0	0	0	0	0	0	0	0	0	0	0	0	0	0	0	0	0	0
1.2097780.A_T.clim-tmax2	1	2097780	A	T	0.0239521	UTR_3_PRIME	clim-tmax2	AT1G06830	terminator	2097155	2098655	0	0	0	0	0	0	0	0	0	0	0	-1	0	0	0	0	0	0	0	0	0	0	0	0	0	0	0	0	0	0	0	0	0	0	0	0	0	0
1.2144622.A_C.clim-tmax2	1	2144622	A	C	0.0239521	INTERGENIC	clim-tmax2	AT1G06980	promoter	2143477	2144977	0	0	0	0	0	0	0	0	0	0	0	0	0	0	0	0	0	0	0	0	0	0	0	0	0	0	0	0	0	0	0	0	0	0	0	0	0	0
1.2149606.C_T.clim-tmax2	1	2149606	C	T	0.0239521	INTRON	clim-tmax2	AT1G07000	terminator	2149157	2150657	0	0	0	0	0	0	0	0	0	0	0	0	0	0	0	0	0	0	0	0	0	0	0	0	0	0	0	0	0	0	0	0	0	0	0	0	0	0
1.2150025.C_T.clim-tmax2	1	2150025	C	T	0.0239521	UTR_3_PRIME	clim-tmax2	AT1G06990	terminator	2149652	2151152	0	0	0	0	0	0	0	0	0	0	0	0	0	0	0	0	0	0	0	0	0	0	0	0	0	0	0	0	0	0	0	0	0	0	0	0	0	0
1.2163783.A_C.clim-tmax2	1	2163783	A	C	0.0239521	INTERGENIC	clim-tmax2	AT1G07040	promoter	2162887	2164387	0	0	0	0	0	0	0	0	0	0	0	0	0	0	0	0	0	0	0	0	0	0	0	0	0	0	0	0	0	0	0	0	0	0	0	0	0	0
1.2170682.G_A.clim-tmax2	1	2170682	G	A	0.0239521	INTRON	clim-tmax2	AT1G07070	terminator	2169457	2170957	0	0	0	0	0	0	0	0	0	0	0	0	0	0	0	0	0	0	0	0	0	0	0	0	0	0	0	0	0	0	0	0	0	0	0	0	0	0
1.2173470.A_T.clim-tmax2	1	2173470	A	T	0.0239521	INTERGENIC	clim-tmax2	AT1G07090	terminator	2172951	2174451	0	0	0	0	0	0	0	0	0	0	0	0	0	0	0	0	0	0	0	0	0	0	0	0	0	0	0	0	-1	0	0	0	0	0	0	0	0	0
1.2173748.T_G.clim-tmax2	1	2173748	T	G	0.0239521	INTERGENIC	clim-tmax2	AT1G07090	terminator	2172951	2174451	0	0	0	0	0	0	0	0	0	0	0	0	0	0	0	0	0	0	0	0	0	0	0	0	0	0	0	0	0	0	0	0	0	0	0	0	0	0
1.2173819.G_T.clim-tmax2	1	2173819	G	T	0.0239521	INTERGENIC	clim-tmax2	AT1G07090	terminator	2172951	2174451	0	0	0	0	0	0	0	0	0	0	0	0	0	0	0	0	0	0	0	0	0	0	0	0	0	0	0	0	0	0	0	0	0	0	0	0	0	0
1.2199380.G_A.clim-tmax2	1	2199380	G	A	0.0239521	NON_SYNONYMOUS_CODING	clim-tmax2	AT1G07170	promoter	2198996	2200496	0	0	0	0	0	0	0	0	0	0	0	0	0	0	0	0	0	0	0	0	0	0	0	0	0	0	0	0	0	0	0	0	0	0	0	0	0	0
1.2241084.C_A.clim-tmax2	1	2241084	C	A	0.0239521	UTR_3_PRIME	clim-tmax2	AT1G07280	terminator	2240971	2242471	0	0	0	0	0	0	0	0	0	0	0	0	0	0	0	0	0	0	0	0	0	0	0	0	0	0	0	0	0	0	0	0	0	0	0	0	0	0
1.2330391.C_G.clim-tmax2	1	2330391	C	G	0.0239521	INTRON	clim-tmax2	AT1G07570	terminator	2330135	2331635	0	0	0	0	0	0	0	0	0	0	0	0	0	0	0	0	0	0	0	0	0	0	0	0	0	0	0	0	0	0	0	0	0	0	0	0	0	0
1.3248864.A_G.clim-tmax2	1	3248864	A	G	0.0239521	INTERGENIC	clim-tmax2	AT1G04753	promoter	3247558	3249058	0	0	0	0	0	0	0	0	0	0	-1	0	0	0	0	0	0	0	0	0	0	0	0	0	0	0	0	0	0	0	0	0	0	0	0	0	0	0
1.3263734.A_G.clim-tmax2	1	3263734	A	G	0.0239521	INTERGENIC	clim-tmax2	AT1G09995	promoter	3263142	3264642	0	0	0	0	0	0	0	0	0	0	0	0	0	0	0	0	0	0	0	0	0	0	0	0	0	0	0	0	0	0	0	0	0	0	0	0	0	0
1.3300409.A_G.clim-tmax2	1	3300409	A	G	0.0239521	UTR_5_PRIME	clim-tmax2	AT1G10095	promoter	3300016	3301516	0	0	0	0	0	0	0	0	0	0	0	0	0	0	0	0	0	0	-1	0	0	0	0	0	0	0	0	0	0	0	0	0	0	0	0	0	0	0
1.3324176.T_A.clim-tmax2	1	3324176	T	A	0.0239521	INTERGENIC	clim-tmax2	AT1G10140	promoter	3323235	3324735	0	0	0	0	0	0	0	0	0	0	0	0	0	0	0	0	0	0	0	0	0	0	0	0	0	0	0	0	0	0	0	0	0	0	0	0	0	0
1.3422680.A_T.clim-tmax2	1	3422680	A	T	0.0239521	INTERGENIC	clim-tmax2	AT1G04793	promoter	3421719	3423219	0	0	0	0	0	0	0	0	0	0	0	0	0	0	0	0	0	0	0	0	0	0	0	0	0	0	0	0	0	0	0	0	0	0	0	0	0	0
1.3428440.T_A.clim-tmax2	1	3428440	T	A	0.0239521	INTERGENIC	clim-tmax2	AT1G10430	terminator	3427477	3428977	0	0	0	0	0	0	0	0	0	0	0	0	0	0	0	0	0	0	0	0	0	0	0	0	0	0	0	0	0	0	0	0	0	0	0	0	0	0
1.3599426.T_C.clim-tmax2	1	3599426	T	C	0.0239521	NON_SYNONYMOUS_CODING	clim-tmax2	AT1G10800	promoter	3598385	3599885	0	0	0	0	0	0	0	0	0	0	0	0	0	0	0	0	0	0	0	0	0	0	0	0	0	0	0	0	0	0	0	0	0	0	0	0	0	0
1.3626820.T_A.clim-tmax2	1	3626820	T	A	0.0239521	NON_SYNONYMOUS_CODING	clim-tmax2	AT1G10880	promoter	3626582	3628082	0	0	0	0	0	0	0	0	0	0	0	0	0	0	0	0	0	0	0	0	0	0	0	0	0	0	0	0	0	0	0	0	0	0	0	0	0	0
1.3665441.C_T.clim-tmax2	1	3665441	C	T	0.0239521	SYNONYMOUS_CODING	clim-tmax2	AT1G10970	terminator	3664086	3665586	0	0	0	0	0	0	0	0	0	0	0	0	0	0	0	0	0	0	0	0	0	0	0	0	0	0	0	0	0	0	0	0	0	0	0	0	0	0
1.3667616.G_A.clim-tmax2	1	3667616	G	A	0.0239521	NON_SYNONYMOUS_CODING	clim-tmax2	AT1G10980	terminator	3666223	3667723	0	0	0	0	0	0	0	0	0	0	0	0	0	0	0	0	0	0	0	0	0	0	0	0	0	0	0	0	0	0	0	0	0	0	0	0	0	0
1.4028684.A_G.clim-tmax2	1	4028684	A	G	0.0239521	INTERGENIC	clim-tmax2	AT1G11930	promoter	4027594	4029094	0	0	0	0	0	0	0	0	0	0	0	0	0	0	0	0	0	0	0	0	0	0	0	0	0	0	0	0	0	0	0	0	0	0	0	0	0	0
1.4030332.A_C.clim-tmax2	1	4030332	A	C	0.0239521	UTR_3_PRIME	clim-tmax2	AT1G11930	terminator	4030156	4031656	0	0	0	0	0	0	0	0	0	0	0	0	0	0	0	0	0	0	0	0	0	0	0	0	0	0	0	0	0	0	0	0	0	0	0	0	0	0
1.4038871.G_T.clim-tmax2	1	4038871	G	T	0.0239521	INTERGENIC	clim-tmax2	AT1G11960	terminator	4038565	4040065	0	0	0	0	0	0	0	0	0	0	0	0	0	0	0	0	0	0	0	0	0	0	0	0	0	0	0	0	0	0	0	0	0	0	0	0	0	0
1.4043956.G_A.clim-tmax2	1	4043956	G	A	0.0239521	INTERGENIC	clim-tmax2	AT1G11970	promoter	4043369	4044869	0	0	0	0	0	0	0	0	0	0	0	0	-1	0	0	0	0	0	0	0	0	0	0	0	0	0	0	0	0	0	0	0	0	0	0	0	0	0
1.4079061.A_T.clim-tmax2	1	4079061	A	T	0.0239521	INTRON	clim-tmax2	AT1G12064	promoter	4077595	4079095	0	0	0	0	0	0	0	0	0	0	0	0	0	0	0	0	0	0	0	0	0	0	0	0	0	0	0	0	0	0	0	0	0	0	0	0	0	0
1.4117552.C_T.clim-tmax2	1	4117552	C	T	0.0239521	UTR_5_PRIME	clim-tmax2	AT1G12120	promoter	4117114	4118614	0	0	0	0	0	0	0	0	0	0	0	0	0	0	0	0	0	0	0	0	0	0	0	0	0	0	0	0	0	0	0	0	0	0	0	0	0	0
1.1402781.A_G.clim-tmax2	1	1402781	A	G	0.0239521	UTR_3_PRIME	clim-tmax2	AT1G04950	terminator	1402084	1403584	0	0	0	0	0	0	0	0	0	0	0	0	0	0	0	0	0	0	0	0	0	0	0	0	0	0	0	0	0	0	0	0	0	0	0	0	0	0
1.3092382.G_T.clim-tmax2	1	3092382	G	T	0.0239521	INTERGENIC	clim-tmax2	AT1G09550	promoter	3091827	3093327	0	0	0	0	0	0	0	0	0	0	0	0	0	0	0	0	0	0	0	0	0	0	0	0	0	0	0	0	0	0	0	0	0	0	0	0	0	0
1.1410472.C_T.clim-tmax2	1	1410472	C	T	0.0239521	INTRON	clim-tmax2	AT1G04960	promoter	1410433	1411933	0	0	0	0	0	0	0	0	0	0	0	0	0	0	0	0	0	0	0	0	0	0	0	0	0	0	0	0	0	0	0	0	0	0	0	0	0	0
1.1490625.T_C.clim-tmax2	1	1490625	T	C	0.0239521	INTRON	clim-tmax2	AT1G05160	promoter	1490505	1492005	0	0	0	0	0	0	0	0	0	0	0	0	0	0	0	0	0	0	0	0	0	0	0	0	0	0	0	0	0	0	0	0	0	0	0	0	0	0
1.1508763.T_C.clim-tmax2	1	1508763	T	C	0.0239521	NON_SYNONYMOUS_CODING	clim-tmax2	AT1G05200	terminator	1508652	1510152	0	0	0	0	0	0	0	0	0	0	0	0	0	0	0	0	0	0	0	0	0	0	-1	0	0	0	0	0	0	0	0	0	0	0	0	0	0	0
1.1638868.C_T.clim-tmax2	1	1638868	C	T	0.0239521	INTERGENIC	clim-tmax2	AT1G05540	promoter	1638222	1639722	0	0	0	0	0	0	0	0	0	0	0	0	0	0	0	0	0	0	0	0	0	0	0	0	0	0	0	0	0	0	0	0	0	0	0	0	0	0
1.1654001.A_C.clim-tmax2	1	1654001	A	C	0.0239521	INTRON	clim-tmax2	AT1G04393	promoter	1653124	1654624	0	0	0	0	0	0	0	0	0	1	0	0	0	0	0	0	0	0	0	0	0	0	0	0	0	0	0	0	0	0	0	0	0	0	0	0	0	0
1.1669231.T_A.clim-tmax2	1	1669231	T	A	0.0239521	INTERGENIC	clim-tmax2	AT1G05590	promoter	1668349	1669849	0	0	0	0	0	0	0	0	0	0	0	0	0	0	0	0	0	0	0	0	0	0	0	0	0	0	0	0	0	0	0	0	0	0	0	0	0	0
1.1676328.C_T.clim-tmax2	1	1676328	C	T	0.0239521	INTERGENIC	clim-tmax2	AT1G05610	promoter	1675577	1677077	0	0	0	0	0	0	0	0	0	0	0	0	0	0	0	0	0	0	0	0	0	0	0	0	0	0	0	0	0	0	0	0	0	0	0	0	0	0
1.1678035.A_T.clim-tmax2	1	1678035	A	T	0.0239521	INTRON	clim-tmax2	AT1G05620	promoter	1677880	1679380	0	0	0	0	0	0	0	0	0	0	0	0	0	0	0	0	0	0	0	0	0	0	0	0	0	0	0	0	0	0	0	0	0	0	0	0	0	0
1.1698024.A_C.clim-tmax2	1	1698024	A	C	0.0239521	UTR_3_PRIME	clim-tmax2	AT1G05670	terminator	1696540	1698040	0	0	0	0	0	0	0	0	0	0	0	0	0	0	0	0	0	0	0	0	0	0	0	0	0	0	0	0	0	0	0	0	0	0	0	0	0	0
1.1701825.G_C.clim-tmax2	1	1701825	G	C	0.0239521	NON_SYNONYMOUS_CODING	clim-tmax2	AT1G05670	promoter	1700565	1702065	0	0	0	0	0	0	0	0	0	0	0	0	0	0	0	0	0	0	0	0	0	0	0	0	0	0	0	0	0	0	0	0	0	0	0	0	0	0
1.1718727.G_A.clim-tmax2	1	1718727	G	A	0.0239521	SYNONYMOUS_CODING	clim-tmax2	AT1G05720	promoter	1718409	1719909	0	0	0	0	0	0	0	0	0	0	0	0	0	0	0	0	0	0	0	0	0	0	0	0	0	0	0	0	0	0	0	0	0	0	0	0	0	0
1.2051789.G_A.clim-tmax2	1	2051789	G	A	0.0239521	INTRON	clim-tmax2	AT1G06690	promoter	2051670	2053170	0	0	0	0	0	0	0	0	0	0	0	0	0	0	0	0	0	0	0	0	0	0	0	0	0	0	0	0	0	0	0	0	0	0	0	0	0	0
1.2160589.A_G.clim-tmax2	1	2160589	A	G	0.0239521	UTR_5_PRIME	clim-tmax2	AT1G07030	promoter	2160318	2161818	0	0	0	0	0	0	0	0	0	0	0	0	0	0	0	0	0	0	0	0	0	0	0	0	0	0	0	0	0	0	0	0	0	0	0	0	0	0
1.2173637.A_G.clim-tmax2	1	2173637	A	G	0.0239521	INTERGENIC	clim-tmax2	AT1G07090	terminator	2172951	2174451	0	0	0	0	0	0	0	0	0	0	0	0	0	0	0	0	0	0	0	0	0	0	0	0	0	0	0	0	0	0	0	0	0	0	0	0	0	0
1.2203165.A_C.clim-tmax2	1	2203165	A	C	0.0239521	INTERGENIC	clim-tmax2	AT1G07175	terminator	2202866	2204366	0	0	0	0	0	0	0	0	0	0	0	0	0	0	0	0	0	0	0	0	0	0	0	0	0	0	0	0	0	0	0	0	0	0	0	0	0	0
1.2338019.C_G.clim-tmax2	1	2338019	C	G	0.0239521	INTRON	clim-tmax2	AT1G07600	terminator	2337903	2339403	0	0	0	0	0	0	0	0	0	0	0	0	0	0	0	0	0	0	0	0	0	0	0	0	0	0	0	0	0	0	0	0	0	0	0	0	0	0
1.3095752.G_T.clim-tmax2	1	3095752	G	T	0.0239521	INTRON	clim-tmax2	AT1G09560	terminator	3094454	3095954	0	0	0	0	0	0	0	0	0	0	0	0	0	0	0	0	0	0	0	0	0	0	0	0	0	0	0	0	0	0	0	0	0	0	0	0	0	0
1.3195887.T_G.clim-tmax2	1	3195887	T	G	0.0239521	UTR_3_PRIME	clim-tmax2	AT1G09840	terminator	3194718	3196218	0	0	0	0	0	0	0	0	0	0	0	0	0	0	0	0	0	0	0	0	0	0	0	0	0	0	0	0	0	0	0	0	0	0	0	0	0	0
1.3201357.G_A.clim-tmax2	1	3201357	G	A	0.0239521	INTERGENIC	clim-tmax2	AT1G09850	promoter	3200684	3202184	0	0	0	0	0	0	0	0	0	0	0	0	0	0	0	0	0	0	0	0	0	0	0	0	0	0	0	-1	0	0	0	0	0	0	0	0	0	0
1.3269362.C_T.clim-tmax2	1	3269362	C	T	0.0239521	INTERGENIC	clim-tmax2	AT1G10010	terminator	3268323	3269823	0	0	0	0	0	0	0	0	0	0	0	0	0	0	0	0	0	0	0	0	0	0	0	0	0	0	0	0	0	0	0	0	0	0	0	0	0	0
1.3272450.C_T.clim-tmax2	1	3272450	C	T	0.0239521	INTERGENIC	clim-tmax2	AT1G10020	promoter	3271610	3273110	0	0	0	0	0	0	0	0	0	0	0	0	0	0	0	0	0	0	0	0	0	0	0	0	0	0	0	0	0	0	0	0	0	0	0	0	0	0
1.3276371.T_C.clim-tmax2	1	3276371	T	C	0.0239521	INTRON	clim-tmax2	AT1G10040	terminator	3274890	3276390	0	0	0	0	0	0	0	0	0	0	0	0	0	0	0	0	0	0	0	0	0	0	0	0	0	0	0	0	0	0	0	0	0	0	0	0	0	0
1.3278215.C_A.clim-tmax2	1	3278215	C	A	0.0239521	NON_SYNONYMOUS_CODING	clim-tmax2	AT1G10050	promoter	3277791	3279291	0	0	0	0	0	0	0	0	0	0	0	0	0	0	0	0	0	0	0	0	0	0	0	0	0	0	0	0	0	0	0	0	0	0	0	0	0	0
1.3402894.T_A.clim-tmax2	1	3402894	T	A	0.0239521	INTERGENIC	clim-tmax2	AT1G10385	promoter	3402131	3403631	0	0	0	0	0	0	0	0	0	0	0	0	0	0	0	0	0	0	0	0	0	0	0	0	0	0	0	0	0	0	0	0	0	0	0	0	0	0
1.3419192.G_A.clim-tmax2	1	3419192	G	A	0.0239521	NON_SYNONYMOUS_CODING	clim-tmax2	AT1G10410	promoter	3419191	3420691	0	0	0	0	0	0	0	0	0	0	0	0	0	0	0	0	0	0	0	0	0	0	0	0	0	0	0	0	0	0	0	0	0	0	0	0	0	0
1.3596000.G_A.clim-tmax2	1	3596000	G	A	0.0239521	INTERGENIC	clim-tmax2	AT1G10790	promoter	3595263	3596763	0	0	0	0	0	0	0	0	0	0	0	0	0	0	0	0	0	0	0	0	0	0	0	0	0	0	0	0	0	0	0	0	0	0	0	0	0	0
1.3667617.T_A.clim-tmax2	1	3667617	T	A	0.0239521	NON_SYNONYMOUS_CODING	clim-tmax2	AT1G10980	terminator	3666223	3667723	0	0	0	0	0	0	0	0	0	0	0	0	0	0	0	0	0	0	0	0	0	0	0	0	0	0	0	0	0	0	0	0	0	0	0	0	0	0
1.3676359.A_T.clim-tmax2	1	3676359	A	T	0.0239521	INTERGENIC	clim-tmax2	AT1G11020	promoter	3675690	3677190	0	0	0	0	0	0	0	0	0	0	0	0	0	0	0	0	0	0	0	0	0	0	0	0	0	0	0	0	0	0	0	0	0	0	0	0	0	0
1.3945822.A_G.clim-tmax2	1	3945822	A	G	0.0239521	.	clim-tmax2	AT1G11700	promoter	3944583	3946083	0	0	0	0	0	0	0	0	0	0	0	0	0	0	0	0	0	0	0	0	0	0	0	0	0	0	0	0	0	0	0	0	0	0	0	0	0	0
1.4013294.C_T.clim-tmax2	1	4013294	C	T	0.0239521	NON_SYNONYMOUS_CODING	clim-tmax2	AT1G11900	terminator	4012120	4013620	0	0	0	0	0	0	0	0	0	0	0	0	0	0	0	0	0	0	0	0	0	0	0	0	0	0	0	0	0	0	0	0	0	0	0	0	0	0
1.4137939.C_T.clim-tmax2	1	4137939	C	T	0.0239521	NON_SYNONYMOUS_CODING	clim-tmax2	AT1G12200	promoter	4136510	4138010	0	0	0	0	0	0	0	0	0	0	0	0	0	0	0	0	0	0	0	0	0	0	0	0	0	0	0	0	0	0	0	0	0	0	0	0	0	0
1.4151473.T_G.clim-tmax2	1	4151473	T	G	0.0239521	INTERGENIC	clim-tmax2	AT1G12230	terminator	4150556	4152056	0	0	0	0	0	0	0	0	0	0	0	0	0	0	0	0	0	0	0	0	0	0	0	-1	0	0	0	0	0	0	0	0	0	0	0	0	0	0
1.4548638.A_T.clim-tmax2	1	4548638	A	T	0.0239521	UTR_3_PRIME	clim-tmax2	AT1G13280	terminator	4548394	4549894	0	0	0	0	0	0	0	0	0	0	0	0	0	0	0	0	0	0	0	0	0	0	0	0	0	0	0	0	0	0	0	0	0	0	0	0	0	0
1.4610452.A_T.clim-tmax2	1	4610452	A	T	0.0239521	INTRON	clim-tmax2	AT1G13440	promoter	4610378	4611878	0	0	0	0	0	0	0	0	0	0	0	0	0	0	0	0	0	0	0	0	0	0	0	0	0	0	0	0	0	0	0	0	0	0	0	0	0	0
1.4652042.C_T.clim-tmax2	1	4652042	C	T	0.0239521	INTERGENIC	clim-tmax2	AT1G13600	promoter	4651049	4652549	0	0	0	0	0	0	0	0	0	0	0	0	0	0	0	0	0	0	0	0	0	0	0	0	0	0	0	0	0	0	0	0	0	0	0	0	0	0
1.4652142.T_A.clim-tmax2	1	4652142	T	A	0.0239521	INTERGENIC	clim-tmax2	AT1G13600	promoter	4651049	4652549	0	0	0	0	0	0	0	0	0	0	0	0	0	0	0	0	0	0	0	0	0	0	0	0	0	0	0	0	0	0	0	0	0	0	0	0	0	0
1.4830764.T_C.clim-tmax2	1	4830764	T	C	0.0239521	NON_SYNONYMOUS_CODING	clim-tmax2	AT1G14110	promoter	4829296	4830796	0	0	0	0	0	0	0	0	0	0	0	0	0	0	0	0	0	0	0	0	0	0	0	0	0	0	0	0	0	0	0	0	0	0	0	0	0	0
1.3092188.G_T.clim-tmax2	1	3092188	G	T	0.0239521	NON_SYNONYMOUS_CODING	clim-tmax2	AT1G09550	promoter	3091827	3093327	0	0	0	0	0	0	0	0	0	0	0	0	0	0	0	0	0	0	0	0	0	0	0	0	0	0	0	0	0	0	0	0	0	0	0	0	0	0
1.7383072.A_G.clim-bio11	1	7383072	A	G	0.0681363	INTERGENIC	clim-bio11	AT1G21080	promoter	7382161	7383661	0	0	0	0	0	0	0	0	0	0	0	0	0	0	0	0	0	0	0	0	0	0	0	0	0	0	0	0	0	0	0	0	0	0	0	0	0	0
1.7382960.A_T.clim-bio11	1	7382960	A	T	0.0681363	INTERGENIC	clim-bio11	AT1G21080	promoter	7382161	7383661	0	0	0	0	0	0	0	0	0	0	0	0	0	0	0	0	0	0	0	0	0	0	0	0	0	0	0	0	0	0	0	0	0	0	0	0	0	0
1.25057718.G_A.clim-bio1	1	25057718	G	A	0.014	.	clim-bio1	AT1G67105	promoter	25056478	25057978	0	0	0	0	0	0	0	0	0	0	0	0	0	0	0	0	0	0	0	0	0	0	0	0	0	0	0	0	0	0	0	0	0	0	0	0	0	0
1.25058031.C_G.clim-bio1	1	25058031	C	G	0.014	.	clim-bio1	AT1G67105	terminator	25057764	25059264	0	0	0	0	0	0	0	0	0	0	0	0	0	0	0	0	0	0	0	0	0	0	0	0	0	0	0	0	0	0	0	0	0	0	0	0	0	0
1.25057842.C_T.clim-bio1	1	25057842	C	T	0.014	.	clim-bio1	AT1G67105	promoter	25056478	25057978	0	0	0	0	0	0	0	0	0	0	0	0	0	0	0	0	0	0	0	0	0	0	0	0	0	0	0	0	0	0	0	0	0	0	0	0	0	0
1.27759708.G_A.clim-bio9	1	27759708	G	A	0.022	INTERGENIC	clim-bio9	AT1G73830	promoter	27758940	27760440	0	0	0	0	0	0	0	0	0	0	0	0	0	0	0	0	0	0	0	0	0	0	0	0	0	0	0	0	0	0	0	0	0	0	0	0	0	0
1.27759192.G_A.clim-bio9	1	27759192	G	A	0.022	INTERGENIC	clim-bio9	AT1G73830	promoter	27758940	27760440	0	0	0	0	0	0	0	0	0	0	0	0	0	0	0	0	0	0	0	0	0	0	0	0	0	0	0	0	0	0	0	0	0	0	0	0	0	0
1.20272807.C_T.clim-gs9	1	20272807	C	T	0.011976	INTERGENIC	clim-gs9	AT1G54300	terminator	20271606	20273106	0	1	0	0	0	0	0	0	0	0	0	0	0	0	0	0	0	0	0	0	0	0	0	0	0	0	0	0	0	0	0	0	0	0	0	0	0	0
1.19755967.C_T.0W GH FT	1	19755967	C	T	0.150327	INTERGENIC	0W GH FT	AT1G53023	promoter	19755343	19756843	0	0	0	0	0	0	0	0	0	0	0	0	0	0	0	0	0	0	0	0	0	0	0	0	0	0	0	0	-1	0	0	0	0	0	0	0	0	0
1.20290677.T_A.clim-gs9	1	20290677	T	A	0.0159681	UTR_5_PRIME	clim-gs9	AT1G54350	terminator	20289901	20291401	0	0	0	0	0	0	0	0	0	0	0	0	0	0	0	0	0	0	0	0	0	0	0	0	0	0	0	0	0	1	0	0	0	0	0	0	0	0
1.20293853.T_A.clim-gs9	1	20293853	T	A	0.0159681	INTRON	clim-gs9	AT1G54360	terminator	20292824	20294324	0	0	0	0	0	0	0	0	0	0	0	0	0	0	0	0	0	0	0	0	0	0	0	0	0	0	0	0	0	0	0	0	0	0	0	0	0	0
1.20297251.T_G.clim-gs9	1	20297251	T	G	0.0159681	INTERGENIC	clim-gs9	AT1G54370	promoter	20296736	20298236	0	0	0	0	0	0	0	0	0	0	0	0	0	0	0	0	0	0	0	0	0	0	0	0	0	0	0	0	0	0	0	0	0	0	0	0	0	0
1.20297851.T_C.clim-gs9	1	20297851	T	C	0.0159681	INTERGENIC	clim-gs9	AT1G54370	promoter	20296736	20298236	0	0	0	0	0	0	0	0	0	0	0	0	0	0	0	0	0	0	0	0	0	0	0	0	0	0	0	0	0	0	0	0	0	1	0	0	0	0
1.20297855.A_C.clim-gs9	1	20297855	A	C	0.0159681	INTERGENIC	clim-gs9	AT1G54370	promoter	20296736	20298236	0	0	1	0	0	0	0	0	0	0	0	0	0	0	0	0	0	0	0	0	0	0	0	0	0	0	0	0	0	0	0	0	0	0	0	0	0	0
1.20297869.A_T.clim-gs9	1	20297869	A	T	0.0159681	INTERGENIC	clim-gs9	AT1G54370	promoter	20296736	20298236	0	0	0	0	0	0	0	0	0	0	0	0	0	0	0	0	0	0	0	0	0	0	0	0	0	0	0	0	0	0	0	0	0	0	0	0	0	0
1.20298144.C_T.clim-gs9	1	20298144	C	T	0.0159681	UTR_3_PRIME	clim-gs9	AT1G54370	promoter	20296736	20298236	0	0	0	0	0	0	0	0	0	0	0	0	0	0	0	0	0	0	0	0	0	0	0	0	0	0	0	0	0	0	0	0	0	0	0	0	0	0
1.20298198.C_A.clim-gs9	1	20298198	C	A	0.0159681	UTR_3_PRIME	clim-gs9	AT1G54370	promoter	20296736	20298236	0	0	0	0	0	0	0	0	0	0	0	0	0	0	0	0	0	0	0	0	0	0	0	0	0	0	0	0	0	0	0	0	0	0	0	0	0	0
1.20298201.A_C.clim-gs9	1	20298201	A	C	0.0159681	UTR_3_PRIME	clim-gs9	AT1G54370	promoter	20296736	20298236	0	0	0	0	0	0	0	0	0	0	0	0	0	0	0	0	0	0	0	0	0	0	0	0	0	0	0	0	0	0	0	0	0	0	0	0	0	0
1.20297186.G_A.clim-gs9	1	20297186	G	A	0.0159681	INTERGENIC	clim-gs9	AT1G54370	promoter	20296736	20298236	0	0	0	0	0	0	0	0	0	0	0	0	0	0	0	0	0	0	0	0	0	0	0	0	0	0	0	0	0	0	0	0	0	0	0	0	0	0
1.20297323.A_G.clim-gs9	1	20297323	A	G	0.0159681	INTERGENIC	clim-gs9	AT1G54370	promoter	20296736	20298236	0	0	0	0	0	0	0	0	0	0	0	0	0	0	0	0	0	0	0	0	0	0	0	0	0	0	0	0	0	0	0	0	0	0	0	0	0	0
1.20297345.C_G.clim-gs9	1	20297345	C	G	0.0159681	INTERGENIC	clim-gs9	AT1G54370	promoter	20296736	20298236	0	-1	0	0	0	0	0	0	0	0	0	0	0	0	0	0	0	0	0	0	0	0	0	0	-1	0	0	0	0	0	0	0	0	0	0	0	0	0
1.20297899.A_G.clim-gs9	1	20297899	A	G	0.0159681	INTERGENIC	clim-gs9	AT1G54370	promoter	20296736	20298236	0	0	0	0	0	0	0	0	0	1	0	0	0	0	0	0	0	0	0	0	0	0	0	0	0	0	0	0	0	0	0	0	0	0	0	0	0	0
1.20298236.A_G.clim-gs9	1	20298236	A	G	0.0159681	UTR_3_PRIME	clim-gs9	AT1G54370	promoter	20296736	20298236	0	0	0	0	0	0	0	0	0	0	0	0	0	0	0	0	0	0	0	0	0	0	0	0	0	0	0	0	0	0	0	0	0	0	0	0	0	0
1.20298262.T_G.clim-gs9	1	20298262	T	G	0.0159681	UTR_3_PRIME	clim-gs9	AT1G54380	terminator	20296804	20298304	0	0	0	0	0	0	0	0	0	0	0	0	0	0	0	0	0	0	0	0	0	0	0	0	0	0	0	0	0	0	0	0	0	0	0	0	0	0
1.20300904.C_T.clim-gs9	1	20300904	C	T	0.0159681	UTR_5_PRIME	clim-gs9	AT1G54380	promoter	20300479	20301979	0	0	0	0	0	0	0	0	0	0	0	0	0	0	0	0	0	0	0	0	0	0	0	0	0	0	0	0	0	0	0	0	0	0	0	0	0	0
1.20293178.A_T.clim-gs9	1	20293178	A	T	0.0159681	UTR_3_PRIME	clim-gs9	AT1G54370	terminator	20292150	20293650	0	0	0	0	0	0	0	0	0	0	0	0	0	0	0	0	0	0	0	0	0	0	0	0	0	0	0	0	0	0	0	0	0	0	0	0	0	0
1.20298208.C_T.clim-gs9	1	20298208	C	T	0.0159681	UTR_3_PRIME	clim-gs9	AT1G54370	promoter	20296736	20298236	0	0	0	0	0	0	0	0	0	0	0	0	0	0	0	0	0	0	0	0	0	0	0	0	0	0	0	0	0	0	0	0	0	0	0	0	0	0
1.20301899.G_A.clim-gs9	1	20301899	G	A	0.0159681	NON_SYNONYMOUS_CODING	clim-gs9	AT1G54380	promoter	20300479	20301979	0	0	0	0	0	0	0	0	0	0	0	0	0	0	0	0	0	0	0	0	0	0	0	0	0	0	0	0	0	0	0	0	0	0	0	0	0	0
1.20297199.A_G.clim-gs9	1	20297199	A	G	0.0159681	INTERGENIC	clim-gs9	AT1G54370	promoter	20296736	20298236	0	0	0	0	0	0	0	0	0	0	0	0	0	0	0	0	0	0	0	0	0	0	0	0	0	0	0	0	0	0	0	0	0	0	0	0	0	0
1.20298009.C_A.clim-gs9	1	20298009	C	A	0.0159681	UTR_3_PRIME	clim-gs9	AT1G54370	promoter	20296736	20298236	0	0	0	0	0	0	0	0	0	0	0	0	0	0	0	0	0	0	0	0	0	0	0	0	0	0	0	0	0	0	0	0	0	0	0	0	0	0
1.20298177.G_C.clim-gs9	1	20298177	G	C	0.0159681	UTR_3_PRIME	clim-gs9	AT1G54370	promoter	20296736	20298236	0	0	0	0	0	0	0	0	0	0	0	0	0	0	0	0	0	0	0	0	0	0	0	0	0	0	0	0	0	0	0	0	0	0	0	0	0	0
1.20298181.T_G.clim-gs9	1	20298181	T	G	0.0159681	UTR_3_PRIME	clim-gs9	AT1G54370	promoter	20296736	20298236	0	0	0	0	0	0	0	0	0	0	0	0	0	0	0	0	0	0	0	0	0	0	0	0	0	0	0	0	0	0	0	0	0	0	0	0	0	0
1.20301591.A_C.clim-gs9	1	20301591	A	C	0.0159681	NON_SYNONYMOUS_CODING	clim-gs9	AT1G54380	promoter	20300479	20301979	0	0	0	0	0	0	0	0	0	0	0	0	0	0	0	0	0	0	0	0	0	0	0	0	0	0	0	0	0	0	0	0	0	0	0	0	0	0
1.20295976.G_C.clim-gs9	1	20295976	G	C	0.0159681	INTRON	clim-gs9	AT1G07967	terminator	20295217	20296717	0	0	0	0	0	0	0	0	0	0	0	0	0	0	0	0	0	0	0	0	0	0	0	0	0	0	0	0	0	0	0	0	0	0	0	0	0	0
1.20297377.C_T.clim-gs9	1	20297377	C	T	0.0159681	INTERGENIC	clim-gs9	AT1G54370	promoter	20296736	20298236	0	0	0	0	0	0	0	0	0	0	0	0	0	0	0	0	0	0	0	0	0	0	0	0	-1	0	0	0	0	0	0	0	0	0	0	0	0	0
1.20297982.T_C.clim-gs9	1	20297982	T	C	0.0159681	UTR_3_PRIME	clim-gs9	AT1G54370	promoter	20296736	20298236	0	0	0	0	0	0	0	0	0	1	0	0	0	0	0	0	0	0	0	0	0	0	0	0	0	0	0	0	0	0	0	0	0	0	0	0	0	0
1.20298077.G_A.clim-gs9	1	20298077	G	A	0.0159681	UTR_3_PRIME	clim-gs9	AT1G54370	promoter	20296736	20298236	0	0	0	0	0	0	0	0	0	0	0	0	0	0	0	0	0	0	0	0	0	0	0	0	0	0	0	0	0	0	0	0	0	0	0	0	0	0
1.20298099.G_A.clim-gs9	1	20298099	G	A	0.0159681	UTR_3_PRIME	clim-gs9	AT1G54370	promoter	20296736	20298236	0	0	0	0	0	0	0	0	0	0	1	0	0	0	0	0	0	0	0	0	0	0	0	0	0	0	0	0	0	0	0	0	0	0	0	0	0	0
1.20298257.G_A.clim-gs9	1	20298257	G	A	0.0159681	UTR_3_PRIME	clim-gs9	AT1G54380	terminator	20296804	20298304	0	0	0	0	0	0	0	0	0	0	0	0	0	0	0	0	0	0	0	0	0	0	0	0	0	0	0	0	0	0	0	0	0	0	0	0	0	0
1.20298264.A_C.clim-gs9	1	20298264	A	C	0.0159681	UTR_3_PRIME	clim-gs9	AT1G54380	terminator	20296804	20298304	0	0	0	0	0	0	0	0	0	0	0	0	0	0	0	0	0	0	0	0	0	0	0	0	0	0	0	0	0	0	0	0	0	0	0	0	0	0
1.4957781.T_G.clim-tmin3	1	4957781	T	G	0.0145228	NON_SYNONYMOUS_CODING	clim-tmin3	AT1G14490	terminator	4957444	4958944	0	0	0	0	0	0	0	0	0	0	0	0	0	0	0	0	0	0	0	0	0	0	0	0	0	0	0	0	0	0	0	0	0	0	0	0	0	0
1.4955861.T_C.clim-tmin3	1	4955861	T	C	0.0145228	INTERGENIC	clim-tmin3	AT1G14470	terminator	4955202	4956702	0	0	0	0	0	0	0	0	0	0	0	0	0	0	0	0	0	0	0	0	0	0	0	0	0	0	0	0	0	-1	0	0	0	0	0	0	0	0
1.4961839.T_C.clim-tmin3	1	4961839	T	C	0.0145228	INTERGENIC	clim-tmin3	AT1G14510	terminator	4960593	4962093	0	0	0	0	0	0	0	0	0	0	0	0	0	0	0	0	0	0	0	0	0	0	0	0	0	0	0	0	0	0	0	0	0	0	0	0	0	0
1.4955971.T_C.clim-tmin3	1	4955971	T	C	0.0145228	INTERGENIC	clim-tmin3	AT1G14470	terminator	4955202	4956702	0	0	0	0	0	0	0	0	0	0	0	0	0	0	0	0	0	0	0	0	0	0	0	0	0	0	0	0	0	0	0	0	0	0	0	0	0	0
1.4959148.C_T.clim-tmin3	1	4959148	C	T	0.0145228	NON_SYNONYMOUS_CODING	clim-tmin3	AT1G14490	promoter	4959029	4960529	0	0	0	0	0	0	0	0	0	0	0	0	0	0	0	0	0	0	0	0	0	0	0	0	0	0	0	0	0	0	0	0	0	0	0	0	0	0
1.4960783.G_T.clim-tmin3	1	4960783	G	T	0.0145228	NON_SYNONYMOUS_CODING	clim-tmin3	AT1G14510	terminator	4960593	4962093	0	0	0	0	0	0	0	0	0	0	0	0	0	0	0	0	0	0	0	0	0	0	0	0	0	0	0	0	0	0	0	0	0	0	0	0	0	0
1.24002519.T_A.clim-tmin6	1	24002519	T	A	0.011976	INTERGENIC	clim-tmin6	AT1G64610	promoter	24001558	24003058	0	0	0	0	0	0	0	0	0	0	0	0	0	0	0	0	0	0	0	0	0	0	0	0	0	0	0	0	0	0	0	0	0	0	0	0	0	0
1.1494051.A_C.clim-tmin6	1	1494051	A	C	0.0239521	UTR_5_PRIME	clim-tmin6	AT1G05170	promoter	1493748	1495248	0	0	0	0	0	0	0	0	0	0	0	0	0	0	0	0	0	0	0	0	0	0	0	0	0	0	0	0	0	0	0	0	0	0	0	0	0	0
1.14018136.G_A.clim-tmin11	1	14018136	G	A	0.0598802	SYNONYMOUS_CODING	clim-tmin11	AT1G36970	promoter	14017856	14019356	0	0	0	0	0	0	0	0	0	0	0	0	0	0	0	0	0	0	0	0	0	0	0	0	0	0	0	0	0	0	0	0	0	0	0	0	0	0
1.14050640.G_A.clim-tmin11	1	14050640	G	A	0.0598802	.	clim-tmin11	AT1G37020	terminator	14049242	14050742	0	0	0	0	0	0	0	0	0	0	0	0	0	0	0	0	0	0	0	0	0	0	0	0	0	0	0	0	0	0	0	0	0	0	0	0	0	0
1.14154556.A_C.clim-tmin11	1	14154556	A	C	0.0598802	INTERGENIC	clim-tmin11	AT1G07013	terminator	14154105	14155605	0	0	0	0	0	0	0	0	0	0	0	0	0	0	1	0	0	0	0	0	0	0	0	0	0	0	0	0	0	0	0	0	0	0	0	0	0	0
1.14154569.T_A.clim-tmin11	1	14154569	T	A	0.0598802	INTERGENIC	clim-tmin11	AT1G07013	terminator	14154105	14155605	0	0	0	0	0	0	0	0	0	0	0	0	0	0	1	0	0	0	0	0	0	0	0	0	0	0	0	0	0	0	0	0	0	0	0	0	0	0
1.23855803.T_A.clim-gs9	1	23855803	T	A	0.0159681	INTERGENIC	clim-gs9	AT1G64280	promoter	23855158	23856658	0	0	0	0	0	0	0	0	0	0	0	0	0	0	0	0	0	0	0	0	0	0	0	0	0	0	0	0	0	0	0	0	0	0	0	0	0	0
1.23855800.T_A.clim-gs9	1	23855800	T	A	0.0159681	INTERGENIC	clim-gs9	AT1G64280	promoter	23855158	23856658	0	0	0	0	0	0	0	0	0	0	0	0	0	0	0	0	0	0	0	0	0	0	0	0	0	0	0	0	0	0	0	0	0	0	0	0	0	0
1.23855804.T_A.clim-gs9	1	23855804	T	A	0.0159681	INTERGENIC	clim-gs9	AT1G64280	promoter	23855158	23856658	0	0	0	0	0	0	0	0	0	0	0	0	0	0	0	0	0	0	0	0	0	0	0	0	0	0	0	0	0	0	0	0	0	0	0	0	0	0
1.19491915.T_C.clim-gs9	1	19491915	T	C	0.0199601	INTERGENIC	clim-gs9	AT1G52342	terminator	19490766	19492266	0	0	0	0	0	0	0	0	0	0	0	0	0	0	0	0	0	0	0	0	0	0	0	0	0	0	0	0	0	0	0	0	0	0	0	0	-1	0
1.292522.G_A.clim-tmax2	1	292522	G	A	0.0379242	INTERGENIC	clim-tmax2	AT1G01800	promoter	292245	293745	0	0	0	0	0	0	0	0	0	0	0	0	0	0	0	0	0	0	0	0	0	0	0	0	0	0	0	0	0	0	0	0	0	0	0	0	0	0
1.1576377.C_T.LN22	1	1576377	C	T	0.0340909	INTERGENIC	LN22	AT1G05380	promoter	1575821	1577321	0	0	0	0	0	0	0	0	0	0	0	0	0	0	0	0	0	0	0	0	0	0	0	0	0	0	0	0	0	0	0	0	0	0	0	0	0	0
1.1639141.C_A.LN22	1	1639141	C	A	0.0340909	INTERGENIC	LN22	AT1G05540	promoter	1638222	1639722	0	0	0	0	0	0	0	0	0	0	0	0	0	0	0	0	0	0	0	0	0	1	0	0	0	0	0	0	0	0	0	0	0	-1	0	0	0	0
1.1573269.A_C.clim-tmax2	1	1573269	A	C	0.0299401	INTERGENIC	clim-tmax2	AT1G05370	promoter	1571969	1573469	0	0	-1	0	0	0	0	0	0	0	0	0	0	0	0	0	0	0	0	0	0	0	0	0	0	0	0	0	0	0	0	0	0	1	0	0	0	0
1.27600638.T_A.clim-tmax10	1	27600638	T	A	0.0379242	INTERGENIC	clim-tmax10	AT1G73400	terminator	27599781	27601281	1	0	0	0	0	0	0	0	0	0	0	0	0	0	0	0	0	0	0	0	0	0	0	0	0	0	0	0	-1	0	0	0	0	0	0	0	0	0
1.21477801.G_A.clim-tmax2	1	21477801	G	A	0.0778443	INTERGENIC	clim-tmax2	AT1G58050	terminator	21477589	21479089	0	0	0	0	0	0	0	0	0	0	0	0	0	0	0	0	0	0	0	0	0	0	0	0	0	0	0	0	0	0	0	0	0	0	0	0	0	0
1.1233750.T_C.clim-tmax2	1	1233750	T	C	0.0299401	INTRON	clim-tmax2	AT1G04520	terminator	1233532	1235032	0	0	0	0	0	0	0	0	0	0	0	0	0	0	0	0	0	0	0	0	0	0	0	0	0	0	0	0	0	0	0	0	0	0	0	0	0	0
1.2916975.T_G.ScalingExponent	1	2916975	T	G	0.0285714	INTERGENIC	ScalingExponent	AT1G09050	promoter	2915967	2917467	0	0	0	0	0	0	0	0	0	0	0	0	0	0	0	0	0	0	0	0	0	0	0	0	0	0	0	0	0	0	0	0	0	0	0	0	0	0
1.3239706.C_G.clim-tmax2	1	3239706	C	G	0.0359281	INTERGENIC	clim-tmax2	AT1G09940	promoter	3239054	3240554	0	0	0	0	0	0	0	0	0	0	0	0	0	0	0	0	0	0	0	0	0	0	0	0	0	0	0	0	0	0	0	0	0	0	0	0	0	0
1.3239726.C_T.clim-tmax2	1	3239726	C	T	0.0359281	INTERGENIC	clim-tmax2	AT1G09940	promoter	3239054	3240554	0	0	0	0	0	0	0	0	0	0	0	0	0	0	0	0	0	0	0	0	0	0	0	0	0	0	0	0	0	0	0	0	0	0	0	0	0	0
1.21019031.G_A.clim-gs9	1	21019031	G	A	0.011976	INTERGENIC	clim-gs9	AT1G56150	terminator	21017622	21019122	0	0	0	0	0	0	0	0	0	0	0	0	1	0	0	0	0	0	-1	0	0	0	0	0	0	0	0	0	0	0	0	0	0	0	0	0	0	0
1.21019109.G_A.clim-gs9	1	21019109	G	A	0.011976	INTERGENIC	clim-gs9	AT1G56150	terminator	21017622	21019122	0	0	0	0	0	0	0	0	0	0	0	0	0	0	0	0	0	0	0	0	0	0	0	0	0	0	0	0	0	0	0	0	0	0	0	0	0	0
1.16132020.A_G.clim-tmax1	1	16132020	A	G	0.0758483	INTERGENIC	clim-tmax1	AT1G07143	promoter	16130686	16132186	0	0	0	0	0	0	0	0	0	0	0	0	0	0	0	0	0	0	0	0	0	0	0	0	0	0	0	0	0	0	0	0	0	0	0	0	0	0
1.1308508.G_A.clim-tmax2	1	1308508	G	A	0.011976	INTERGENIC	clim-tmax2	AT1G04680	promoter	1307473	1308973	0	0	0	0	0	0	0	0	0	0	0	0	0	0	0	0	0	0	0	0	0	0	0	0	0	0	0	0	0	0	0	0	0	0	0	0	0	0
1.22833097.A_G.clim-tmin6	1	22833097	A	G	0.0139721	INTRON	clim-tmin6	AT1G08433	terminator	22832810	22834310	0	0	0	0	0	0	0	0	0	0	0	0	0	0	0	0	0	0	0	0	0	0	0	0	0	0	0	0	0	0	0	1	0	0	0	0	0	0
1.22833500.A_T.clim-tmin6	1	22833500	A	T	0.0139721	INTRON	clim-tmin6	AT1G08433	terminator	22832810	22834310	0	0	0	0	0	0	0	0	0	0	0	0	0	0	0	0	0	0	0	0	0	0	0	0	0	0	0	0	0	0	0	0	0	0	0	0	0	0
1.22834950.T_A.clim-tmin6	1	22834950	T	A	0.0139721	INTERGENIC	clim-tmin6	AT1G61810	terminator	22834228	22835728	0	0	0	0	0	0	0	0	0	0	0	0	0	0	0	0	0	0	0	0	0	0	0	0	0	0	0	0	0	0	0	0	0	0	0	0	0	0
1.1097028.C_A.clim-bio9	1	1097028	C	A	0.016	UTR_5_PRIME	clim-bio9	AT1G04160	terminator	1096010	1097510	0	0	0	0	0	0	0	0	0	0	0	0	0	0	0	0	0	0	0	0	0	0	0	0	0	0	0	0	0	0	0	0	0	0	0	0	0	0
1.29753234.A_G.clim-aet11	1	29753234	A	G	0.011976	UTR_5_PRIME	clim-aet11	AT1G79100	promoter	29752647	29754147	0	0	0	0	0	0	0	0	0	0	0	0	0	0	0	0	0	0	0	0	0	0	0	0	0	0	0	0	0	0	0	0	0	0	0	0	0	0
1.27612386.A_G.clim-tmin6	1	27612386	A	G	0.011976	UTR_3_PRIME	clim-tmin6	AT1G73440	terminator	27612315	27613815	0	0	0	0	0	0	0	0	0	0	0	0	0	0	0	0	0	0	0	0	0	0	0	0	0	0	0	0	0	0	0	0	0	0	0	0	0	0
1.27746255.C_T.clim-bio9	1	27746255	C	T	0.016	INTRON	clim-bio9	AT1G73790	terminator	27744929	27746429	0	0	0	0	0	0	0	0	0	0	0	0	0	0	0	0	0	0	0	0	0	0	0	0	0	0	0	0	0	0	0	0	0	0	0	0	0	0
1.12401152.G_T.rFitness tlp	1	12401152	G	T	0.0136719	INTERGENIC	rFitness tlp	AT1G34065	promoter	12400536	12402036	0	0	0	0	0	0	0	0	0	0	0	0	0	0	0	0	0	0	0	0	0	0	0	0	0	0	0	0	0	0	0	0	0	0	0	0	0	0
1.8740890.A_T.clim-tmin7	1	8740890	A	T	0.0259481	INTRAGENIC	clim-tmin7	AT1G24660	terminator	8739969	8741469	0	0	0	0	0	0	0	0	0	0	0	0	0	0	0	0	0	0	0	0	0	0	0	0	0	0	0	0	0	0	0	0	0	0	0	0	0	0
1.8706190.T_C.clim-tmin7	1	8706190	T	C	0.0259481	INTERGENIC	clim-tmin7	AT1G24570	promoter	8705799	8707299	0	0	0	0	0	0	0	0	0	0	0	0	0	0	0	0	0	0	0	0	0	0	0	0	0	0	0	0	0	0	0	0	0	0	0	0	0	0
1.8738115.C_T.clim-tmin7	1	8738115	C	T	0.0259481	INTRAGENIC	clim-tmin7	AT1G24650	terminator	8736815	8738315	0	0	0	0	0	0	0	0	0	0	0	0	0	0	0	0	0	0	0	0	0	0	0	0	0	0	0	0	0	0	0	0	0	0	0	0	0	0
1.4383667.G_C.clim-tmax2	1	4383667	G	C	0.0379242	INTERGENIC	clim-tmax2	AT1G12860	promoter	4383303	4384803	0	0	0	0	0	0	0	0	0	0	0	0	0	0	0	0	0	0	0	0	0	1	0	0	0	0	0	0	0	0	0	0	0	0	0	0	0	0
1.7489330.G_A.clim-tmax12	1	7489330	G	A	0.0179641	UTR_3_PRIME	clim-tmax12	AT1G21380	promoter	7488280	7489780	0	0	0	0	0	0	0	0	0	0	0	0	0	0	0	0	0	0	0	0	0	0	0	0	0	0	0	0	0	0	0	0	0	0	0	0	0	0
1.3227863.A_C.clim-tmax2	1	3227863	A	C	0.0359281	NON_SYNONYMOUS_CODING	clim-tmax2	AT1G09920	promoter	3226583	3228083	0	0	0	0	0	0	0	0	0	0	0	0	0	0	0	0	0	0	0	0	0	0	0	0	0	0	0	0	0	0	0	0	0	0	0	0	0	0
1.7476262.C_G.clim-tmax12	1	7476262	C	G	0.011976	NON_SYNONYMOUS_CODING	clim-tmax12	AT1G21340	promoter	7475021	7476521	0	0	0	0	0	0	0	0	0	0	0	0	0	0	0	0	0	0	0	0	0	0	0	0	0	0	0	0	0	0	0	0	0	0	0	0	0	0
1.14196101.T_A.clim-tmin11	1	14196101	T	A	0.0638723	INTERGENIC	clim-tmin11	AT1G07017	promoter	14195020	14196520	0	0	0	0	0	0	0	0	0	0	0	0	0	0	0	0	0	0	0	0	0	0	0	0	0	0	0	0	0	0	0	0	0	0	0	0	0	0
1.14283774.A_T.clim-tmin11	1	14283774	A	T	0.0638723	INTERGENIC	clim-tmin11	AT1G07023	promoter	14283251	14284751	0	0	0	0	0	0	0	0	0	0	0	0	0	0	0	0	0	0	0	0	0	0	0	0	0	0	0	0	0	0	0	0	0	0	0	0	0	0
1.14286053.C_T.clim-tmin11	1	14286053	C	T	0.0638723	INTERGENIC	clim-tmin11	AT1G07027	terminator	14284891	14286391	0	0	0	0	0	0	0	0	0	0	-1	0	0	0	0	0	0	0	0	0	0	0	0	0	0	0	0	0	0	0	0	0	0	0	0	0	0	0
1.14282807.A_G.clim-tmin11	1	14282807	A	G	0.0638723	INTERGENIC	clim-tmin11	AT1G07023	terminator	14282370	14283870	0	0	0	0	0	0	0	0	0	0	0	0	-1	0	0	0	0	0	1	0	0	0	0	0	0	0	0	0	0	0	0	0	0	0	0	0	0	0
1.7388638.T_C.GR63 cold	1	7388638	T	C	0.0869565	INTERGENIC	GR63 cold	AT1G21100	promoter	7388012	7389512	0	0	0	0	0	0	0	0	0	0	0	0	0	0	0	0	0	0	0	0	0	0	0	0	0	0	0	0	0	0	0	0	0	0	0	0	0	0
1.3928252.T_C.clim-tmin3	1	3928252	T	C	0.0518672	UTR_3_PRIME	clim-tmin3	AT1G11670	terminator	3927114	3928614	0	0	0	0	0	0	0	0	0	0	0	0	0	0	0	0	0	0	0	0	0	0	0	0	0	0	0	0	0	0	0	0	0	0	0	0	0	0
1.14284933.T_A.clim-tmin5	1	14284933	T	A	0.0199601	INTERGENIC	clim-tmin5	AT1G07027	terminator	14284891	14286391	0	0	0	0	0	0	0	0	0	0	0	0	0	0	0	0	0	0	0	0	0	0	0	0	0	0	0	0	0	0	0	0	0	0	0	0	0	0
1.28996343.A_T.FT Field	1	28996343	A	T	0.0666667	INTRON	FT Field	AT1G77160	promoter	28996094	28997594	0	0	0	0	0	0	0	0	0	0	0	0	0	0	0	0	0	0	0	0	0	0	0	0	0	0	0	0	0	0	0	0	0	0	0	0	0	0
1.28996342.A_G.FT Field	1	28996342	A	G	0.0666667	INTRON	FT Field	AT1G77160	promoter	28996094	28997594	0	0	0	0	0	0	0	0	0	0	0	0	0	0	0	0	0	0	0	0	0	0	0	0	0	0	0	0	0	0	0	0	0	0	0	0	0	0
1.28996345.A_T.FT Field	1	28996345	A	T	0.0666667	INTRON	FT Field	AT1G77160	promoter	28996094	28997594	0	0	0	0	0	0	0	0	0	0	0	0	0	0	0	0	0	0	0	0	0	0	0	0	0	0	0	0	0	0	0	0	0	0	0	0	0	0
1.28996344.A_T.FT Field	1	28996344	A	T	0.0666667	INTRON	FT Field	AT1G77160	promoter	28996094	28997594	0	0	0	0	0	0	0	0	0	0	0	0	0	0	0	0	0	0	0	0	0	0	0	0	0	0	0	0	0	0	0	0	0	0	0	0	0	0
1.18681849.G_A.clim-tmin6	1	18681849	G	A	0.0159681	INTERGENIC	clim-tmin6	AT1G50430	terminator	18680931	18682431	0	0	0	0	0	0	0	0	0	0	0	0	0	0	0	0	0	0	0	0	0	0	0	0	0	0	0	0	0	0	0	0	0	0	0	0	0	0
1.18691323.A_G.clim-tmin6	1	18691323	A	G	0.0159681	INTERGENIC	clim-tmin6	AT1G50450	promoter	18690003	18691503	0	0	0	0	0	0	0	0	0	0	0	0	0	0	0	0	0	0	0	0	0	0	0	0	0	0	0	0	0	0	0	0	0	0	0	0	0	0
1.9484366.T_C.LN22	1	9484366	T	C	0.0852273	UTR_3_PRIME	LN22	AT1G27310	terminator	9483315	9484815	0	0	0	0	0	0	0	0	0	0	0	0	0	0	0	0	0	0	0	0	0	0	0	0	0	0	0	0	0	0	0	0	0	0	0	0	-1	0
1.1448699.A_T.clim-tmax1	1	1448699	A	T	0.0179641	INTERGENIC	clim-tmax1	AT1G05040	promoter	1447963	1449463	0	0	0	0	0	0	0	0	0	0	0	0	0	0	0	0	0	0	0	0	0	0	0	0	0	0	0	0	0	0	0	0	0	0	0	0	0	0
1.1454959.T_C.clim-tmax1	1	1454959	T	C	0.0179641	INTERGENIC	clim-tmax1	AT1G05065	promoter	1454822	1456322	0	0	0	0	0	0	0	0	0	0	0	0	0	0	0	0	0	0	0	0	0	0	0	0	0	0	0	0	0	0	0	0	0	0	0	0	0	0
1.1448855.C_T.clim-tmax1	1	1448855	C	T	0.0179641	UTR_3_PRIME	clim-tmax1	AT1G05040	promoter	1447963	1449463	0	0	0	0	0	0	0	0	0	0	0	0	0	0	0	0	0	0	0	0	0	0	0	0	0	0	0	0	0	0	0	0	0	0	0	0	0	0
1.1049602.A_T.clim-tmax1	1	1049602	A	T	0.0279441	INTERGENIC	clim-tmax1	AT1G04070	terminator	1049504	1051004	0	0	0	0	0	0	0	0	0	0	0	0	0	0	0	0	0	0	0	0	0	0	0	0	0	0	0	0	0	0	0	0	0	0	0	0	0	0
1.1060868.A_C.clim-tmax1	1	1060868	A	C	0.0279441	INTRON	clim-tmax1	AT1G04110	terminator	1060296	1061796	0	0	0	0	0	0	0	0	0	0	0	0	0	0	0	0	0	0	0	0	0	0	0	0	0	0	0	0	0	0	0	0	0	0	0	0	0	0
1.1060273.T_C.clim-tmax1	1	1060273	T	C	0.0279441	INTRON	clim-tmax1	AT1G04090	terminator	1058954	1060454	0	0	0	0	0	0	0	0	0	0	0	0	0	0	0	0	0	0	0	0	0	0	0	0	0	0	0	0	0	0	0	0	0	0	0	0	0	0
1.1060465.G_A.clim-tmax1	1	1060465	G	A	0.0279441	SYNONYMOUS_CODING	clim-tmax1	AT1G04110	terminator	1060296	1061796	0	0	0	0	0	0	0	0	0	0	0	0	0	0	0	0	0	0	0	0	0	0	0	0	0	0	0	0	0	0	0	0	0	0	0	0	0	0
1.29537415.G_T.clim-aet4	1	29537415	G	T	0.0179641	UTR_5_PRIME	clim-aet4	AT1G78520	terminator	29536805	29538305	0	0	0	0	0	0	0	0	0	0	0	0	0	0	0	0	0	0	0	0	0	0	-1	0	0	0	0	0	0	0	0	0	0	0	0	0	0	0
1.24776326.A_T.clim-tmin3	1	24776326	A	T	0.0394191	INTERGENIC	clim-tmin3	AT1G66420	promoter	24776183	24777683	0	0	0	0	0	0	0	0	0	0	0	0	-1	0	0	0	0	0	0	0	0	0	0	0	0	0	0	0	0	0	0	0	0	0	0	0	0	0
1.8660580.T_A.clim-aet11	1	8660580	T	A	0.011976	INTERGENIC	clim-aet11	AT1G05903	terminator	8659851	8661351	0	0	0	0	0	0	0	0	0	0	0	0	0	0	0	0	0	0	0	0	0	0	0	0	0	0	0	0	0	0	0	0	0	0	0	0	0	0
1.1104118.A_G.clim-tmax1	1	1104118	A	G	0.0219561	INTERGENIC	clim-tmax1	AT1G04180	promoter	1103492	1104992	0	0	0	0	0	0	0	0	0	0	0	0	0	0	0	0	0	0	0	0	0	0	0	0	0	0	0	0	0	0	0	0	0	0	0	0	0	0
1.1677106.G_A.clim-tmax12	1	1677106	G	A	0.0139721	INTERGENIC	clim-tmax12	AT1G05615	terminator	1676506	1678006	0	0	0	0	0	0	0	0	0	0	0	0	0	0	0	0	0	0	0	0	0	0	0	0	0	0	0	0	0	0	0	0	0	0	0	0	0	0
1.22741659.T_C.clim-tmin6	1	22741659	T	C	0.0179641	INTERGENIC	clim-tmin6	AT1G08403	terminator	22741316	22742816	0	0	0	0	0	0	0	0	0	0	0	0	0	0	0	0	0	0	0	0	0	0	0	0	0	0	0	0	0	0	0	0	0	0	0	0	0	0
1.27857820.C_G.clim-tmax3	1	27857820	C	G	0.07	INTERGENIC	clim-tmax3	AT1G74080	terminator	27857098	27858598	0	0	0	0	0	0	0	0	0	0	0	0	0	0	0	0	0	0	0	0	0	0	0	0	0	0	0	0	0	0	0	0	0	0	0	0	0	0
1.16892854.G_T.clim-tmin3	1	16892854	G	T	0.0124481	INTRON	clim-tmin3	AT1G44750	promoter	16891526	16893026	0	0	0	0	0	0	0	0	0	0	0	0	0	0	0	0	0	0	0	0	0	0	0	0	0	0	0	0	0	0	0	0	0	0	0	0	0	0
1.16892853.T_A.clim-tmin3	1	16892853	T	A	0.0124481	INTRON	clim-tmin3	AT1G44750	promoter	16891526	16893026	0	0	0	0	0	0	0	0	0	0	0	0	0	0	0	0	0	0	0	0	0	0	0	0	0	0	0	0	0	0	0	0	0	0	0	0	0	0
1.16892855.G_A.clim-tmin3	1	16892855	G	A	0.0124481	INTRON	clim-tmin3	AT1G44750	promoter	16891526	16893026	0	0	0	0	0	0	0	0	0	0	0	0	0	0	-1	0	0	0	0	0	0	0	0	0	0	0	0	0	0	0	0	0	0	0	0	0	0	0
1.9084184.C_A.clim-tmax12	1	9084184	C	A	0.0219561	SYNONYMOUS_CODING	clim-tmax12	AT1G26250	promoter	9082837	9084337	0	0	0	0	0	0	0	0	0	0	0	0	0	0	0	0	0	0	0	0	0	0	0	0	0	0	0	0	0	0	0	0	0	0	0	0	0	0
1.23399284.C_A.FRI	1	23399284	C	A	0.0487805	INTERGENIC	FRI	AT1G63100	terminator	23398111	23399611	0	0	0	0	0	0	0	0	0	0	0	0	0	0	0	0	0	0	0	0	0	0	0	0	0	0	0	0	0	0	0	0	0	0	0	0	0	0
1.12398815.C_T.clim-tmax12	1	12398815	C	T	0.0299401	NON_SYNONYMOUS_CODING	clim-tmax12	AT1G34065	terminator	12397427	12398927	0	0	0	0	0	0	0	0	0	0	0	0	0	0	0	0	0	0	0	0	0	0	0	0	0	0	0	0	-1	0	0	0	0	0	0	0	0	0
1.1072173.T_C.clim-tmax1	1	1072173	T	C	0.0379242	INTERGENIC	clim-tmax1	AT1G04243	terminator	1071573	1073073	0	0	0	0	0	0	0	0	0	0	0	0	0	0	0	0	0	0	-1	0	0	0	0	0	0	0	0	0	0	0	0	0	0	0	0	0	0	0
1.8756134.T_A.clim-tmin7	1	8756134	T	A	0.0279441	INTERGENIC	clim-tmin7	AT1G24706	terminator	8755104	8756604	0	0	0	0	0	0	0	0	0	0	0	0	0	0	0	0	0	0	0	0	0	0	0	0	0	0	0	0	0	0	0	0	0	0	0	0	0	0
1.27561924.G_A.clim-tmax3	1	27561924	G	A	0.06	NON_SYNONYMOUS_CODING	clim-tmax3	AT1G73310	terminator	27561440	27562940	0	0	0	0	0	0	0	0	0	0	0	-1	0	0	0	0	0	0	0	0	0	0	0	0	0	0	0	0	0	0	0	0	0	0	0	0	0	0
1.29002331.G_T.FT Field	1	29002331	G	T	0.05	INTERGENIC	FT Field	AT1G77180	promoter	29001643	29003143	0	0	0	0	0	0	0	0	0	0	0	0	0	0	0	0	0	0	0	0	0	0	0	0	0	0	0	0	0	0	0	0	0	0	0	0	0	0
1.24026549.T_G.clim-tmin6	1	24026549	T	G	0.011976	INTERGENIC	clim-tmin6	AT1G64650	promoter	24026030	24027530	0	0	0	0	0	0	0	0	0	0	0	0	0	0	0	0	0	0	0	0	0	0	0	0	0	0	0	0	0	0	0	0	0	0	0	0	0	0
1.9323106.T_C.clim-bio8	1	9323106	T	C	0.0259481	INTERGENIC	clim-bio8	AT1G26910	terminator	9322528	9324028	0	0	0	0	0	0	0	0	0	0	0	0	0	0	0	0	0	0	0	0	0	0	0	0	0	0	0	0	0	0	0	0	0	0	0	0	0	0
1.9312763.T_C.clim-bio8	1	9312763	T	C	0.0259481	INTERGENIC	clim-bio8	AT1G26870	promoter	9311935	9313435	0	0	0	0	0	0	0	0	0	0	0	0	0	0	0	0	0	0	0	0	0	0	0	0	0	0	0	0	0	0	0	0	0	0	0	0	0	0
1.9317070.T_C.clim-bio8	1	9317070	T	C	0.0259481	INTERGENIC	clim-bio8	AT1G26890	promoter	9316588	9318088	0	0	0	0	0	0	0	0	0	0	0	0	0	0	1	0	0	0	0	0	0	0	0	-1	0	0	0	0	0	0	0	0	0	0	0	0	0	0
1.9068310.G_A.clim-tmax12	1	9068310	G	A	0.0159681	INTRON	clim-tmax12	AT1G26210	terminator	9067707	9069207	0	0	0	0	0	0	0	0	0	0	0	0	0	0	0	0	0	0	0	0	0	0	0	0	0	0	0	0	0	0	0	0	0	0	0	0	0	0
1.9017798.A_T.clim-tmax12	1	9017798	A	T	0.0159681	INTERGENIC	clim-tmax12	AT1G25988	promoter	9016950	9018450	0	0	0	0	0	0	0	0	0	0	0	0	0	0	0	0	0	0	0	0	0	0	0	0	0	0	0	0	0	0	0	0	0	0	0	0	0	0
1.9054544.G_C.clim-tmax12	1	9054544	G	C	0.0159681	UTR_5_PRIME	clim-tmax12	AT1G26180	promoter	9053672	9055172	0	0	0	0	0	0	0	0	0	0	-1	0	0	0	0	0	0	0	0	0	0	0	0	0	0	0	0	0	0	0	0	0	0	0	0	0	0	0
1.9076866.C_T.clim-tmax12	1	9076866	C	T	0.0159681	INTERGENIC	clim-tmax12	AT1G26233	promoter	9075682	9077182	0	0	0	0	0	0	0	0	0	0	0	0	0	0	0	0	0	0	0	0	0	0	0	0	0	0	0	0	0	0	0	0	0	0	0	0	0	0
1.9028641.A_T.clim-tmax12	1	9028641	A	T	0.0159681	UTR_3_PRIME	clim-tmax12	AT1G26120	terminator	9027375	9028875	0	0	0	0	0	0	0	0	0	0	0	0	0	0	0	0	0	0	0	0	0	0	0	0	0	0	0	0	0	0	0	0	0	0	0	0	0	0
1.8999779.T_A.clim-tmax12	1	8999779	T	A	0.0159681	UTR_5_PRIME	clim-tmax12	AT1G25580	promoter	8999417	9000917	0	0	0	0	0	0	0	0	0	0	0	0	0	0	0	0	0	0	0	0	0	0	0	0	0	0	0	0	0	0	0	0	0	0	0	0	0	0
1.9063480.G_A.clim-tmax12	1	9063480	G	A	0.0159681	SYNONYMOUS_CODING	clim-tmax12	AT1G26200	terminator	9062305	9063805	0	0	0	0	0	0	0	0	0	0	0	0	0	0	0	0	0	0	0	0	0	0	0	0	0	0	0	0	0	0	0	0	0	0	0	0	0	0
1.9070389.A_C.clim-tmax12	1	9070389	A	C	0.0159681	INTERGENIC	clim-tmax12	AT1G26220	promoter	9070139	9071639	0	0	0	0	0	0	0	0	0	0	0	0	0	0	0	0	0	0	0	0	0	0	0	0	0	0	0	0	0	0	0	0	0	0	0	0	0	0
1.9076645.A_G.clim-tmax12	1	9076645	A	G	0.0159681	UTR_5_PRIME	clim-tmax12	AT1G26233	promoter	9075682	9077182	0	0	0	0	0	0	0	0	0	0	0	0	0	0	0	0	0	0	0	0	0	0	0	0	0	0	0	0	0	0	0	0	0	0	0	0	0	0
1.9046740.G_A.clim-tmax12	1	9046740	G	A	0.0159681	NON_SYNONYMOUS_CODING	clim-tmax12	AT1G26160	promoter	9046549	9048049	0	0	0	0	0	0	0	0	0	0	0	0	0	0	0	0	0	0	0	0	0	0	0	0	0	0	0	0	0	0	0	0	0	0	0	0	0	0
1.9068311.T_A.clim-tmax12	1	9068311	T	A	0.0159681	INTRON	clim-tmax12	AT1G26210	terminator	9067707	9069207	0	0	0	0	0	0	0	0	0	0	0	0	0	0	0	0	0	0	0	0	0	0	0	0	0	0	0	0	0	0	0	0	0	0	0	0	0	0
1.27680001.T_G.clim-tmax1	1	27680001	T	G	0.0658683	INTERGENIC	clim-tmax1	AT1G73610	terminator	27679560	27681060	0	0	0	0	0	0	0	0	0	0	0	0	0	0	0	0	0	0	0	0	0	0	0	0	0	0	0	0	0	0	0	0	0	0	0	0	0	0
1.27685163.G_A.clim-tmax1	1	27685163	G	A	0.0658683	NON_SYNONYMOUS_CODING	clim-tmax1	AT1G73630	promoter	27683672	27685172	0	0	0	0	0	0	0	0	0	0	0	0	0	0	0	0	0	0	0	0	0	0	0	0	0	0	0	0	0	0	0	0	0	0	0	0	0	0
1.27677172.A_C.clim-tmax1	1	27677172	A	C	0.0658683	INTERGENIC	clim-tmax1	AT1G73607	terminator	27676388	27677888	0	0	0	0	0	0	0	0	0	0	0	0	0	0	0	0	0	0	0	0	0	0	0	0	0	0	0	0	0	0	0	0	0	0	0	0	0	0
1.8958091.T_G.clim-tmax12	1	8958091	T	G	0.0339321	INTERGENIC	clim-tmax12	AT1G25500	promoter	8957632	8959132	0	0	0	0	0	0	0	0	0	0	0	0	0	0	0	0	0	0	0	0	0	0	0	0	0	0	0	0	0	0	0	0	0	0	0	0	0	0
1.16136160.G_A.clim-tmax1	1	16136160	G	A	0.0598802	NON_SYNONYMOUS_CODING	clim-tmax1	AT1G42990	terminator	16134722	16136222	0	0	0	0	0	0	0	0	0	0	0	0	0	0	0	0	0	0	0	0	0	0	0	0	0	0	0	0	0	0	0	0	0	0	0	0	0	0
1.16547809.C_T.clim-bio9	1	16547809	C	T	0.064	INTERGENIC	clim-bio9	AT1G43770	promoter	16547416	16548916	0	0	0	0	0	0	0	0	0	0	0	0	0	0	0	0	0	0	0	0	0	0	0	0	0	0	0	0	0	0	0	0	0	0	0	0	0	0
1.12416550.T_A.clim-tmax12	1	12416550	T	A	0.0239521	INTRAGENIC	clim-tmax12	AT1G34110	terminator	12416011	12417511	0	0	0	0	0	0	0	0	0	0	0	0	0	0	0	0	0	0	0	0	0	0	0	0	0	0	0	0	0	0	0	0	0	0	0	0	0	0
1.12399296.C_T.clim-tmax12	1	12399296	C	T	0.0239521	INTRON	clim-tmax12	AT1G34060	promoter	12397918	12399418	0	0	0	0	0	0	0	0	0	0	0	0	0	0	0	0	0	0	0	0	0	0	0	0	0	0	0	0	0	0	0	0	0	0	0	0	0	0
1.12396358.A_C.clim-tmax12	1	12396358	A	C	0.0239521	INTERGENIC	clim-tmax12	AT1G34060	terminator	12395396	12396896	0	0	0	0	0	0	0	0	0	0	0	0	0	0	0	0	0	0	0	0	0	0	0	0	0	0	0	0	0	0	0	0	0	0	0	0	0	0
1.16423512.C_T.clim-tmax1	1	16423512	C	T	0.0618762	INTERGENIC	clim-tmax1	AT1G07177	promoter	16423305	16424805	0	0	0	0	0	0	0	0	0	0	0	0	0	0	0	0	0	0	0	0	0	0	0	0	0	0	0	0	0	0	0	0	0	0	0	0	0	0
1.1061266.G_C.clim-tmax1	1	1061266	G	C	0.0379242	INTERGENIC	clim-tmax1	AT1G04110	terminator	1060296	1061796	0	0	0	0	0	0	0	0	0	0	0	0	0	0	0	0	0	0	0	0	0	0	0	0	0	0	0	0	0	0	0	0	0	0	0	0	0	0
1.1061434.G_A.clim-tmax1	1	1061434	G	A	0.0379242	INTERGENIC	clim-tmax1	AT1G04110	terminator	1060296	1061796	0	0	0	0	0	0	0	0	0	0	0	0	0	0	0	0	0	0	0	0	0	0	0	0	0	0	0	0	0	0	0	0	0	0	0	0	0	0
1.4659889.T_G.clim-prec4	1	4659889	T	G	0.0139721	INTERGENIC	clim-prec4	AT1G13605	terminator	4658615	4660115	0	0	0	0	0	0	0	0	0	0	0	0	0	0	0	0	0	0	0	0	0	0	0	0	0	0	0	0	0	0	0	0	0	0	0	0	0	0
1.4666596.G_T.clim-prec4	1	4666596	G	T	0.0139721	INTERGENIC	clim-prec4	AT1G13610	promoter	4665630	4667130	0	0	0	0	0	0	0	0	0	0	0	0	0	0	0	0	0	0	0	0	0	0	0	0	0	0	0	0	0	0	0	0	0	0	0	0	0	0
1.2285786.A_C.clim-prec4	1	2285786	A	C	0.0139721	INTERGENIC	clim-prec4	AT1G07440	terminator	2285184	2286684	0	0	0	0	0	0	0	0	0	0	0	0	0	0	0	0	0	0	0	0	0	0	0	0	0	0	0	0	0	0	0	0	0	0	0	0	0	0
1.4660202.T_G.clim-prec4	1	4660202	T	G	0.0139721	INTERGENIC	clim-prec4	AT1G13607	promoter	4659777	4661277	0	0	0	0	0	0	0	0	0	0	0	0	0	0	0	0	0	0	0	0	0	1	0	0	0	0	0	0	0	0	0	0	0	0	0	0	0	0
1.4766766.T_G.clim-prec4	1	4766766	T	G	0.0139721	INTERGENIC	clim-prec4	AT1G13940	promoter	4766352	4767852	0	0	0	0	0	0	0	0	0	0	0	0	0	0	0	0	0	0	0	0	0	0	0	0	0	0	0	0	0	0	0	0	0	0	0	0	0	0
1.4697190.C_A.clim-prec4	1	4697190	C	A	0.0139721	INTERGENIC	clim-prec4	AT1G05027	terminator	4696500	4698000	0	0	0	0	0	0	0	0	0	0	0	0	0	0	0	0	0	0	0	0	0	0	0	0	0	0	0	0	0	0	0	0	0	0	0	0	0	0
1.4697945.T_C.clim-prec4	1	4697945	T	C	0.0139721	INTERGENIC	clim-prec4	AT1G05027	promoter	4697667	4699167	0	0	0	0	0	0	0	0	0	0	0	0	0	0	0	0	0	0	0	0	0	0	0	0	0	0	0	0	0	0	0	0	0	0	0	0	0	0
1.2285589.A_G.clim-prec4	1	2285589	A	G	0.0139721	INTERGENIC	clim-prec4	AT1G07440	terminator	2285184	2286684	0	0	0	0	0	0	0	0	0	0	0	0	0	0	0	0	0	0	0	0	0	0	0	0	0	0	0	0	0	0	0	1	0	1	0	0	0	0
1.1584200.A_C.clim-tmax1	1	1584200	A	C	0.0139721	INTRON	clim-tmax1	AT1G05385	promoter	1583260	1584760	0	0	0	0	0	0	0	0	0	0	0	0	0	0	0	0	0	0	0	0	0	0	0	0	0	0	0	0	0	0	0	0	0	0	0	0	0	0
1.1099991.C_G.clim-tmax1	1	1099991	C	G	0.0399202	INTERGENIC	clim-tmax1	AT1G04170	terminator	1099401	1100901	0	0	0	0	0	0	0	0	0	0	0	0	0	0	0	0	0	0	0	0	0	0	0	0	0	0	0	0	0	0	0	0	0	0	0	0	0	0
1.16413277.T_A.clim-tmax1	1	16413277	T	A	0.0598802	INTERGENIC	clim-tmax1	AT1G43580	promoter	16412236	16413736	0	0	0	0	0	0	0	0	0	0	0	0	0	0	0	0	0	0	0	0	0	0	0	0	0	0	0	0	0	0	0	0	0	0	0	0	0	0
1.16423876.A_T.clim-tmax1	1	16423876	A	T	0.0598802	INTERGENIC	clim-tmax1	AT1G43610	promoter	16423577	16425077	0	0	0	0	0	0	0	0	0	0	0	0	0	0	0	0	0	0	0	0	0	0	0	-1	0	0	0	0	0	0	0	0	0	0	0	0	0	0
1.16424063.G_A.clim-tmax1	1	16424063	G	A	0.0598802	INTERGENIC	clim-tmax1	AT1G43610	promoter	16423577	16425077	0	0	0	0	0	0	0	0	0	0	0	0	0	0	0	0	0	0	0	0	0	0	0	0	0	0	0	0	0	0	0	0	0	0	0	0	0	0
1.16430477.G_A.clim-tmax1	1	16430477	G	A	0.0598802	INTERGENIC	clim-tmax1	AT1G43620	promoter	16429787	16431287	0	0	0	0	0	0	0	0	0	0	0	0	0	0	0	0	0	0	0	0	0	0	0	0	0	0	0	0	0	0	0	0	0	0	0	0	0	0
1.16436441.T_C.clim-tmax1	1	16436441	T	C	0.0598802	UTR_3_PRIME	clim-tmax1	AT1G43630	terminator	16435249	16436749	0	0	0	0	0	0	0	0	0	0	0	0	0	0	-1	0	0	0	0	0	0	0	0	0	0	0	0	0	0	0	0	0	0	0	0	0	0	0
1.11861166.A_G.clim-bio9	1	11861166	A	G	0.02	INTERGENIC	clim-bio9	AT1G32763	promoter	11860423	11861923	0	0	0	0	0	0	0	0	0	0	0	0	0	0	0	0	0	0	0	0	0	0	0	0	0	0	0	0	0	0	0	0	0	0	0	0	0	0
1.11093565.G_A.clim-tmax1	1	11093565	G	A	0.0159681	INTERGENIC	clim-tmax1	AT1G31080	terminator	11092399	11093899	0	0	0	0	0	0	0	0	0	0	0	0	0	0	0	0	0	0	0	0	0	0	0	0	0	0	0	0	0	0	0	0	0	0	0	0	0	0
1.21675707.G_A.clim-tmax12	1	21675707	G	A	0.0159681	INTERGENIC	clim-tmax12	AT1G58360	promoter	21675387	21676887	0	0	0	0	0	0	0	0	0	0	0	0	0	0	0	0	0	0	0	0	0	0	0	0	0	0	0	0	1	0	0	0	0	0	0	0	0	0
1.16152162.A_G.clim-tmax12	1	16152162	A	G	0.0638723	SYNONYMOUS_CODING	clim-tmax12	AT1G43005	terminator	16151740	16153240	0	0	0	0	0	0	0	0	0	0	0	0	0	0	0	0	0	0	0	0	0	0	0	0	0	0	0	0	0	0	0	0	0	0	0	0	0	0
1.932109.T_C.clim-bio9	1	932109	T	C	0.048	INTERGENIC	clim-bio9	AT1G03730	promoter	931485	932985	0	0	0	0	0	0	0	0	0	1	0	0	0	0	0	0	0	0	0	0	0	0	0	0	0	0	0	0	-1	0	0	0	0	0	0	0	0	0
1.27597728.G_A.clim-tmax3	1	27597728	G	A	0.068	INTERGENIC	clim-tmax3	AT1G73400	promoter	27597032	27598532	0	0	0	0	0	0	0	0	0	0	0	0	0	0	0	0	0	0	0	0	0	0	0	0	0	0	0	0	0	0	0	0	0	0	0	0	0	0
1.7310744.T_C.0W GH FT	1	7310744	T	C	0.0718954	INTERGENIC	0W GH FT	AT1G20960	promoter	7309771	7311271	0	0	0	0	0	0	0	0	0	0	0	0	0	0	0	0	0	0	0	0	0	0	0	0	0	0	0	0	0	0	0	0	0	0	0	0	0	0
1.19248642.A_G.DTFplantingSummerLocSweden2009	1	19248642	A	G	0.0128755	INTERGENIC	DTFplantingSummerLocSweden2009	AT1G51840	terminator	19248400	19249900	0	0	0	0	0	0	0	0	0	0	0	0	0	0	0	0	0	0	0	0	0	0	0	0	0	0	0	0	0	0	0	0	0	0	0	0	0	0
1.28856639.A_T.clim-bio8	1	28856639	A	T	0.0219561	INTERGENIC	clim-bio8	AT1G76870	promoter	28855838	28857338	0	0	0	0	0	0	0	0	0	0	0	0	0	0	0	0	0	0	0	0	0	0	0	0	0	0	0	0	0	0	0	0	0	0	0	0	0	0
1.15942160.C_T.clim-tmax12	1	15942160	C	T	0.0638723	INTERGENIC	clim-tmax12	AT1G07123	terminator	15941937	15943437	0	0	0	0	0	0	0	0	0	0	0	0	0	0	0	0	0	0	0	0	0	0	0	0	0	0	0	0	0	0	0	0	0	0	0	0	0	0
1.5866691.A_C.ScalingExponent	1	5866691	A	C	0.0190476	NON_SYNONYMOUS_CODING	ScalingExponent	AT1G17160	promoter	5866534	5868034	0	0	0	0	0	0	0	0	0	0	0	0	0	0	0	0	0	0	0	0	0	0	0	0	0	0	0	0	0	0	0	0	0	0	0	0	0	0
1.936775.A_T.clim-bio9	1	936775	A	T	0.04	STOP_GAINED	clim-bio9	AT1G03740	terminator	936652	938152	0	0	0	0	0	0	0	0	0	0	0	0	0	0	0	0	0	0	0	0	0	0	0	0	0	0	0	0	0	0	0	0	0	0	0	0	0	0
1.29428476.T_C.Mo98	1	29428476	T	C	0.0645161	INTERGENIC	Mo98	AT1G09797	terminator	29428066	29429566	0	0	0	0	0	0	0	0	0	0	0	0	0	0	0	0	0	0	-1	0	0	0	0	0	0	0	0	1	0	0	0	0	0	0	0	0	0	0
1.29428871.C_T.Mo98	1	29428871	C	T	0.0645161	INTERGENIC	Mo98	AT1G09797	terminator	29428066	29429566	0	0	0	0	0	0	0	0	0	0	0	0	0	0	0	0	0	0	0	0	0	0	0	0	0	0	0	0	0	0	0	0	0	-1	0	0	0	0
1.29428660.A_G.Mo98	1	29428660	A	G	0.0645161	INTERGENIC	Mo98	AT1G09797	terminator	29428066	29429566	0	0	0	0	0	0	0	0	0	0	0	0	0	0	0	0	0	0	0	0	0	0	0	0	0	0	0	-1	0	0	0	0	0	0	0	0	0	0
1.29428219.A_G.Mo98	1	29428219	A	G	0.0645161	INTERGENIC	Mo98	AT1G09797	promoter	29426801	29428301	0	0	0	0	0	0	0	0	0	0	0	0	0	0	0	0	0	0	0	0	0	0	0	0	0	0	0	0	0	0	0	0	0	0	0	0	0	0
1.29428719.A_T.Mo98	1	29428719	A	T	0.0645161	INTERGENIC	Mo98	AT1G09797	terminator	29428066	29429566	0	0	0	0	0	0	0	0	0	0	0	0	0	0	0	0	0	0	0	0	0	0	0	0	0	0	0	0	0	0	0	0	0	0	0	0	0	0
1.29428823.A_T.Mo98	1	29428823	A	T	0.0645161	INTERGENIC	Mo98	AT1G09797	terminator	29428066	29429566	0	0	0	0	0	0	0	0	0	0	0	0	0	0	0	0	0	0	0	0	0	0	0	0	0	0	0	0	0	0	0	0	0	0	0	0	0	0
1.9662535.C_G.clim-bio9	1	9662535	C	G	0.018	NON_SYNONYMOUS_CODING	clim-bio9	AT1G27750	terminator	9661494	9662994	0	0	0	0	0	0	0	0	0	0	0	0	0	0	0	0	0	0	0	0	0	0	0	0	0	0	0	0	0	0	0	0	0	0	0	0	0	0
1.9643469.G_A.clim-bio9	1	9643469	G	A	0.018	NON_SYNONYMOUS_CODING	clim-bio9	AT1G27710	terminator	9642852	9644352	0	0	0	0	0	0	0	0	0	0	0	0	0	0	0	0	0	0	0	0	0	0	0	0	0	0	0	0	0	0	0	0	0	0	0	0	0	0
1.25057982.C_T.clim-bio1	1	25057982	C	T	0.016	.	clim-bio1	AT1G67105	terminator	25057764	25059264	0	0	0	0	0	0	0	0	0	0	0	0	0	0	0	0	0	0	0	0	0	0	0	0	0	0	0	0	0	0	0	0	0	0	0	0	0	0
1.4129892.C_G.DTFplantingSummerLocSweden2009	1	4129892	C	G	0.027897	INTERGENIC	DTFplantingSummerLocSweden2009	AT1G12170	promoter	4129201	4130701	0	0	0	0	0	0	0	0	0	0	0	0	0	0	0	0	0	0	0	0	0	0	0	0	0	0	0	0	0	0	0	0	0	0	0	0	0	0
1.893120.A_T.clim-tmax1	1	893120	A	T	0.0199601	INTRAGENIC	clim-tmax1	AT1G03560	promoter	891992	893492	0	0	0	0	0	0	0	0	0	0	0	0	0	0	0	0	0	0	0	0	0	0	0	0	0	0	0	0	0	0	0	0	0	0	0	0	0	0
1.25015991.T_C.clim-tmax1	1	25015991	T	C	0.0558882	INTERGENIC	clim-tmax1	AT1G67030	promoter	25015401	25016901	0	0	0	0	0	0	0	0	0	0	0	0	0	0	0	0	0	0	0	0	0	0	0	0	0	0	0	0	0	0	0	0	0	0	0	0	0	0
1.18065338.G_C.Leaf roll 16	1	18065338	G	C	0.119318	INTRON	Leaf roll 16	AT1G48850	terminator	18063904	18065404	0	0	0	0	0	0	0	0	0	0	0	0	0	0	0	0	0	0	0	0	0	0	0	0	0	0	0	0	0	0	0	0	0	0	0	0	0	0
1.16414614.C_T.clim-tmax1	1	16414614	C	T	0.0618762	NON_SYNONYMOUS_CODING	clim-tmax1	AT1G43600	promoter	16414356	16415856	0	0	0	0	0	0	0	0	0	0	0	0	0	0	0	0	0	0	0	0	0	0	0	0	0	0	0	0	0	0	0	0	0	0	0	0	0	0
1.16538618.G_A.clim-tmax11	1	16538618	G	A	0.0818363	INTERGENIC	clim-tmax11	AT1G43765	terminator	16537591	16539091	0	0	0	0	0	0	0	0	0	0	0	0	0	0	0	0	0	0	0	0	0	0	0	0	0	0	0	0	0	0	0	0	0	0	0	0	0	0
1.8195412.C_T.clim-bio9	1	8195412	C	T	0.012	INTERGENIC	clim-bio9	AT1G23100	promoter	8194775	8196275	0	0	0	0	0	0	0	0	0	0	0	0	0	0	0	0	0	0	0	0	0	0	0	0	0	0	0	0	0	0	0	0	0	0	0	0	0	0
1.8196216.G_A.clim-bio9	1	8196216	G	A	0.012	INTRON	clim-bio9	AT1G23100	promoter	8194775	8196275	0	0	0	0	0	0	0	0	0	0	0	0	0	0	0	0	0	0	0	0	0	0	0	0	0	0	0	0	0	0	0	0	0	0	0	0	0	0
1.1454860.A_T.clim-tmax1	1	1454860	A	T	0.0199601	INTERGENIC	clim-tmax1	AT1G05065	promoter	1454822	1456322	0	0	0	0	0	0	0	0	0	0	0	0	0	0	0	0	0	0	0	0	0	0	0	0	0	0	0	0	0	0	0	0	0	0	0	0	0	0
1.2887729.C_T.LC Duration GH	1	2887729	C	T	0.0408163	INTERGENIC	LC Duration GH	AT1G08990	promoter	2887426	2888926	0	0	0	0	0	0	0	0	0	0	0	0	0	0	0	0	0	0	0	0	0	0	0	0	0	0	0	0	0	0	0	0	0	0	0	0	0	0
1.1041171.A_C.clim-bio9	1	1041171	A	C	0.028	NON_SYNONYMOUS_CODING	clim-bio9	AT1G04020	terminator	1039762	1041262	0	0	0	0	0	0	0	0	0	0	0	0	0	0	0	0	0	0	0	0	0	0	0	0	0	0	0	0	0	0	0	0	0	0	0	0	0	0
1.944122.A_G.clim-bio9	1	944122	A	G	0.058	INTERGENIC	clim-bio9	AT1G03760	promoter	942877	944377	0	0	0	0	0	0	0	0	0	0	0	0	0	0	0	0	0	0	0	0	0	0	0	0	0	0	0	0	0	0	0	0	0	0	0	0	0	0
1.9493023.T_A.LN22	1	9493023	T	A	0.0681818	UTR_5_PRIME	LN22	AT1G27330	promoter	9491848	9493348	0	0	0	0	0	0	0	0	0	0	0	0	0	0	0	0	0	0	0	0	0	0	0	0	0	0	0	0	0	0	0	0	0	0	0	0	0	0
1.9493030.A_G.LN22	1	9493030	A	G	0.0681818	UTR_5_PRIME	LN22	AT1G27330	promoter	9491848	9493348	0	0	0	0	0	0	0	0	0	0	0	0	0	0	0	0	0	0	0	0	0	0	0	0	0	0	0	0	0	0	0	0	0	0	0	0	0	0
1.9493026.G_A.LN22	1	9493026	G	A	0.0681818	UTR_5_PRIME	LN22	AT1G27330	promoter	9491848	9493348	0	0	0	0	0	0	0	0	0	0	0	0	0	0	0	0	0	0	0	0	0	0	0	0	0	0	0	0	0	0	0	0	0	0	0	0	0	0
1.9493027.G_A.LN22	1	9493027	G	A	0.0681818	UTR_5_PRIME	LN22	AT1G27330	promoter	9491848	9493348	0	0	0	0	0	0	0	0	0	0	0	0	0	0	0	0	0	0	0	0	0	0	0	0	0	0	0	0	0	0	0	0	0	0	0	0	0	0
1.9493020.G_A.LN22	1	9493020	G	A	0.0681818	UTR_5_PRIME	LN22	AT1G27330	promoter	9491848	9493348	0	0	0	0	0	0	0	0	0	0	0	0	0	0	0	0	0	0	0	0	0	0	0	0	0	0	0	0	0	0	0	0	0	0	0	0	0	0
1.1103945.G_C.clim-bio9	1	1103945	G	C	0.018	INTERGENIC	clim-bio9	AT1G04180	promoter	1103492	1104992	0	0	0	0	0	0	0	0	0	0	0	0	0	0	0	0	0	0	0	0	0	0	0	0	0	0	0	0	0	0	0	0	0	0	0	0	0	0
1.7504705.C_A.clim-tmax12	1	7504705	C	A	0.0219561	INTERGENIC	clim-tmax12	AT1G21440	promoter	7503775	7505275	0	0	0	0	0	0	0	0	0	0	0	0	0	0	0	0	0	0	0	0	0	0	0	0	0	0	0	0	0	0	0	0	0	0	0	0	0	0
1.7518023.G_C.clim-tmax12	1	7518023	G	C	0.0219561	INTERGENIC	clim-tmax12	AT1G21480	terminator	7517945	7519445	0	0	0	0	0	0	0	0	0	0	0	-1	0	0	0	0	0	0	0	0	0	0	-1	0	-1	0	0	0	0	0	0	0	0	0	0	0	0	0
1.7545195.T_A.clim-tmax12	1	7545195	T	A	0.0219561	NON_SYNONYMOUS_CODING	clim-tmax12	AT1G21530	terminator	7544148	7545648	0	0	0	0	0	0	0	0	0	0	0	0	0	0	0	0	0	0	0	0	0	0	0	0	0	0	0	0	0	0	0	0	0	0	0	0	0	0
1.7513500.A_C.clim-tmax12	1	7513500	A	C	0.0219561	INTERGENIC	clim-tmax12	AT1G21460	promoter	7512981	7514481	0	0	0	0	0	0	0	0	0	0	0	0	0	0	0	0	0	0	0	0	0	0	0	0	0	0	0	0	0	0	0	0	0	0	0	0	0	0
1.7521687.C_T.clim-tmax12	1	7521687	C	T	0.0219561	INTERGENIC	clim-tmax12	AT1G21480	promoter	7521052	7522552	0	0	0	0	0	0	0	0	0	0	0	0	0	0	0	0	0	0	0	0	0	0	0	0	0	0	0	0	0	0	0	0	0	0	0	0	0	0
1.7522252.T_C.clim-tmax12	1	7522252	T	C	0.0219561	INTERGENIC	clim-tmax12	AT1G21480	promoter	7521052	7522552	0	0	0	0	0	0	0	0	0	0	0	0	0	0	0	0	0	0	0	0	0	0	0	0	0	0	0	0	0	0	0	0	0	0	0	0	0	0
1.7517776.C_T.clim-tmax12	1	7517776	C	T	0.0219561	INTERGENIC	clim-tmax12	AT1G21470	promoter	7517137	7518637	0	0	0	0	0	0	0	0	0	0	0	0	0	0	0	0	0	0	0	0	0	0	0	0	0	0	0	0	0	0	0	0	0	0	0	0	0	0
1.7499687.G_A.clim-tmax12	1	7499687	G	A	0.0219561	INTERGENIC	clim-tmax12	AT1G21410	terminator	7499116	7500616	0	0	0	0	0	0	0	0	0	0	0	0	0	0	0	0	0	0	0	0	0	0	0	0	0	0	0	0	0	0	0	0	0	0	0	0	0	0
1.7518303.G_C.clim-tmax12	1	7518303	G	C	0.0219561	INTERGENIC	clim-tmax12	AT1G21480	terminator	7517945	7519445	0	0	0	0	0	0	0	0	0	0	0	0	0	0	0	0	0	0	0	0	0	0	0	0	0	0	0	0	0	0	0	0	0	0	0	0	0	0
1.7518386.G_A.clim-tmax12	1	7518386	G	A	0.0219561	INTERGENIC	clim-tmax12	AT1G21480	terminator	7517945	7519445	0	0	0	0	0	0	0	0	0	0	0	0	0	0	0	0	0	0	0	0	0	0	0	0	0	0	0	0	0	0	0	0	0	0	0	0	0	0
1.7519223.T_C.clim-tmax12	1	7519223	T	C	0.0219561	NON_SYNONYMOUS_CODING	clim-tmax12	AT1G21480	terminator	7517945	7519445	0	0	0	0	0	0	0	0	0	0	0	0	0	0	0	0	0	0	1	0	0	0	0	0	0	0	0	0	0	0	0	0	0	0	0	0	0	0
1.7519377.T_A.clim-tmax12	1	7519377	T	A	0.0219561	INTRON	clim-tmax12	AT1G21480	terminator	7517945	7519445	0	0	0	0	0	0	0	0	0	0	0	0	0	0	0	0	0	0	1	0	0	0	0	0	0	0	0	0	0	0	0	0	0	0	0	0	0	0
1.7522250.G_A.clim-tmax12	1	7522250	G	A	0.0219561	INTERGENIC	clim-tmax12	AT1G21480	promoter	7521052	7522552	0	0	0	0	0	0	0	0	0	0	0	0	0	0	0	0	0	0	0	0	0	0	0	0	0	0	0	0	0	0	0	0	0	0	0	0	0	0
1.7521827.G_A.clim-tmax12	1	7521827	G	A	0.0219561	INTERGENIC	clim-tmax12	AT1G21480	promoter	7521052	7522552	0	0	0	0	0	0	0	0	0	0	0	0	0	0	0	0	0	0	0	0	0	0	0	0	0	0	0	0	0	0	0	0	0	0	0	0	0	0
1.7522025.C_T.clim-tmax12	1	7522025	C	T	0.0219561	INTERGENIC	clim-tmax12	AT1G21480	promoter	7521052	7522552	0	0	0	0	0	0	0	0	0	0	0	0	0	0	0	0	0	0	0	0	0	0	0	0	0	0	0	0	0	0	0	0	0	0	0	0	0	0
1.7523163.G_C.clim-tmax12	1	7523163	G	C	0.0219561	INTERGENIC	clim-tmax12	AT1G21475	terminator	7522971	7524471	0	0	0	0	0	0	0	0	0	0	0	0	0	0	0	0	0	0	0	0	0	1	0	0	1	0	0	0	0	0	0	0	0	0	0	0	0	0
1.2921299.G_A.ScalingExponent	1	2921299	G	A	0.0261905	NON_SYNONYMOUS_CODING	ScalingExponent	AT1G09050	terminator	2920611	2922111	0	0	0	0	0	0	0	0	0	0	0	0	0	0	0	0	0	0	0	0	0	0	0	0	0	0	0	0	0	0	0	0	0	0	0	0	0	0
1.2946475.C_T.ScalingExponent	1	2946475	C	T	0.0261905	INTRON	ScalingExponent	AT1G09150	promoter	2945029	2946529	0	0	0	0	0	0	0	0	0	0	0	0	0	0	0	0	0	0	0	0	0	0	0	0	0	1	0	0	0	0	0	0	0	0	0	0	0	0
1.2935619.G_A.ScalingExponent	1	2935619	G	A	0.0261905	INTRON	ScalingExponent	AT1G09100	terminator	2935527	2937027	0	0	0	0	0	0	0	0	0	0	0	0	0	0	0	0	0	0	0	0	0	0	0	0	0	0	0	0	0	0	0	0	0	0	0	0	0	0
1.2956076.A_G.ScalingExponent	1	2956076	A	G	0.0261905	INTERGENIC	ScalingExponent	AT1G09160	promoter	2955245	2956745	0	0	0	0	0	0	0	0	0	0	0	0	0	0	0	0	0	0	0	0	0	0	0	0	0	0	0	0	1	0	0	0	0	0	0	0	0	0
1.2950998.G_A.ScalingExponent	1	2950998	G	A	0.0261905	INTERGENIC	ScalingExponent	AT1G09157	terminator	2950634	2952134	0	0	0	0	0	0	0	0	0	0	0	0	0	0	0	0	0	0	0	0	0	0	0	0	0	0	0	0	0	0	0	0	0	0	0	0	0	0
1.2921298.G_A.ScalingExponent	1	2921298	G	A	0.0261905	SYNONYMOUS_CODING	ScalingExponent	AT1G09050	terminator	2920611	2922111	0	0	0	0	0	0	0	0	0	0	0	0	0	0	0	0	0	0	0	0	0	0	0	0	0	0	0	0	0	0	0	0	0	0	0	0	0	0
1.24635708.A_G.clim-bio9	1	24635708	A	G	0.014	INTERGENIC	clim-bio9	AT1G66150	terminator	24634281	24635781	0	0	0	0	0	0	0	0	0	0	0	0	0	0	0	0	0	0	0	0	0	0	0	0	0	0	0	0	0	0	0	0	0	0	0	0	0	0
1.2410100.C_T.clim-bio9	1	2410100	C	T	0.012	UTR_3_PRIME	clim-bio9	AT1G07780	terminator	2408864	2410364	0	0	0	0	0	0	0	0	0	0	0	0	0	0	0	0	0	0	0	0	0	0	0	0	0	0	0	0	0	0	0	0	0	0	0	0	0	0
1.8721064.T_A.clim-tmax10	1	8721064	T	A	0.0179641	NON_SYNONYMOUS_CODING	clim-tmax10	AT1G24600	terminator	8720221	8721721	0	0	1	0	0	0	0	0	0	0	0	0	0	0	0	0	0	0	0	0	0	0	0	0	0	0	0	0	0	0	0	0	0	0	0	0	0	0
1.7518105.T_C.clim-tmax12	1	7518105	T	C	0.0239521	INTERGENIC	clim-tmax12	AT1G21480	terminator	7517945	7519445	0	0	0	0	0	0	0	0	0	0	0	0	0	0	0	0	0	0	0	0	0	1	0	0	0	0	0	0	0	0	0	0	0	0	0	0	0	0
1.13320661.G_T.clim-bio1	1	13320661	G	T	0.012	INTERGENIC	clim-bio1	AT1G06937	terminator	13320375	13321875	0	0	0	0	0	0	0	0	0	0	0	0	0	0	0	0	0	0	0	0	0	0	0	0	0	0	0	0	0	0	0	0	0	0	0	0	0	0
1.13320732.C_A.clim-bio1	1	13320732	C	A	0.012	INTERGENIC	clim-bio1	AT1G06937	terminator	13320375	13321875	0	0	0	0	0	0	0	0	0	0	0	0	0	0	0	0	0	0	0	0	0	0	0	0	0	0	0	0	0	0	0	0	0	0	0	0	0	0
1.2866351.T_A.clim-tmax11	1	2866351	T	A	0.0678643	INTERGENIC	clim-tmax11	AT1G04683	promoter	2865292	2866792	0	0	0	0	0	0	0	0	0	0	0	0	0	0	0	0	0	0	0	0	0	0	0	0	0	0	0	0	0	0	0	0	0	0	0	0	0	0
1.12652501.A_G.Seed bank 133-91	1	12652501	A	G	0.0545455	NON_SYNONYMOUS_CODING	Seed bank 133-91	AT1G34550	promoter	12652146	12653646	0	0	0	0	0	0	0	0	0	0	0	0	0	0	0	0	0	0	0	0	0	0	0	0	0	0	0	0	0	0	0	0	0	0	0	0	0	0
1.6912211.C_T.clim-gs1	1	6912211	C	T	0.131737	INTERGENIC	clim-gs1	AT1G19910	promoter	6912000	6913500	0	0	0	0	0	0	0	0	0	0	0	0	0	0	1	0	0	0	0	0	0	0	0	0	0	0	0	0	-1	0	0	0	0	0	0	0	0	0
1.27854675.A_C.clim-tmax3	1	27854675	A	C	0.066	INTERGENIC	clim-tmax3	AT1G74080	promoter	27854577	27856077	0	0	0	0	0	0	0	0	0	0	0	0	0	0	0	0	0	0	0	0	0	0	0	0	0	0	0	0	0	0	0	0	0	0	0	0	0	0
1.9391096.A_G.clim-bio8	1	9391096	A	G	0.0199601	INTERGENIC	clim-bio8	AT1G27045	promoter	9390608	9392108	0	0	0	0	0	0	0	0	0	0	0	0	0	0	0	0	0	0	0	0	0	0	0	0	0	0	0	0	0	0	0	0	0	0	0	0	0	0
1.9386651.T_C.clim-bio8	1	9386651	T	C	0.0199601	INTERGENIC	clim-bio8	AT1G27040	terminator	9385692	9387192	0	0	0	0	0	0	0	0	0	0	0	0	0	0	0	0	0	0	0	0	0	0	0	0	0	0	0	0	0	0	0	0	0	0	0	0	0	0
1.9337965.G_A.clim-bio8	1	9337965	G	A	0.0199601	INTERGENIC	clim-bio8	AT1G26930	promoter	9337438	9338938	0	0	0	0	0	0	0	0	0	0	0	0	0	0	0	0	0	0	0	0	0	0	0	0	0	0	0	0	0	0	0	0	0	0	0	0	0	0
1.9391667.C_G.clim-bio8	1	9391667	C	G	0.0199601	UTR_5_PRIME	clim-bio8	AT1G27045	promoter	9390608	9392108	0	0	0	0	0	0	0	0	0	0	0	0	0	0	0	0	0	0	0	0	0	0	0	0	0	0	0	0	0	0	0	0	0	0	0	0	0	0
1.18364878.T_C.clim-gs11	1	18364878	T	C	0.0419162	INTERGENIC	clim-gs11	AT1G49620	terminator	18364335	18365835	0	0	0	0	0	0	0	0	0	0	0	0	0	0	0	0	0	0	0	0	0	0	0	0	0	0	0	0	0	0	0	0	0	0	0	0	0	0
1.1019210.T_C.clim-bio9	1	1019210	T	C	0.086	UTR_3_PRIME	clim-bio9	AT1G03980	terminator	1018310	1019810	0	0	0	0	0	0	0	0	0	0	0	0	0	0	0	0	0	0	0	0	0	0	0	0	0	0	0	0	0	0	0	0	0	0	0	0	0	0
1.23818961.C_A.clim-bio9	1	23818961	C	A	0.012	INTERGENIC	clim-bio9	AT1G64170	promoter	23817981	23819481	0	0	0	0	0	0	0	0	0	0	0	0	0	0	0	0	0	0	0	0	0	0	0	0	0	0	0	0	0	0	0	0	0	0	0	0	0	0
1.23801859.G_A.clim-bio9	1	23801859	G	A	0.012	INTERGENIC	clim-bio9	AT1G64110	promoter	23801299	23802799	0	0	0	0	0	0	0	0	0	0	0	0	0	0	0	0	0	0	0	0	0	0	0	0	0	0	0	0	0	0	0	0	0	0	0	0	0	0
1.23821741.T_C.clim-bio9	1	23821741	T	C	0.012	SYNONYMOUS_CODING	clim-bio9	AT1G64180	promoter	23820452	23821952	0	0	0	0	0	0	0	0	0	0	0	0	0	0	0	0	0	0	0	0	0	0	0	0	0	0	0	0	0	0	0	0	0	0	0	0	0	0
1.23831038.A_G.clim-bio9	1	23831038	A	G	0.012	SYNONYMOUS_CODING	clim-bio9	AT1G64210	promoter	23829687	23831187	0	0	0	0	0	0	0	0	0	0	0	0	0	0	0	0	0	0	0	0	0	0	0	0	0	0	0	0	0	0	0	0	0	0	0	0	0	0
1.23844651.C_G.clim-bio9	1	23844651	C	G	0.012	INTERGENIC	clim-bio9	AT1G64255	promoter	23843953	23845453	0	0	0	0	0	0	0	0	0	0	0	0	0	0	0	0	0	0	0	0	0	0	0	0	0	0	0	0	0	0	0	0	0	0	0	0	0	0
1.23828461.A_C.clim-bio9	1	23828461	A	C	0.012	INTERGENIC	clim-bio9	AT1G64200	terminator	23827283	23828783	0	0	0	0	0	0	0	0	0	0	0	0	0	0	0	0	0	0	0	0	0	0	0	0	0	0	0	0	0	0	0	0	0	0	0	0	0	0
1.23791974.G_T.clim-bio9	1	23791974	G	T	0.012	SYNONYMOUS_CODING	clim-bio9	AT1G64090	terminator	23790729	23792229	0	0	0	0	0	0	0	0	0	0	0	0	0	0	0	0	0	0	0	0	0	0	0	0	0	0	0	0	0	0	0	0	0	0	0	0	0	0
1.23830683.T_G.clim-bio9	1	23830683	T	G	0.012	INTERGENIC	clim-bio9	AT1G64210	promoter	23829687	23831187	0	0	0	0	0	0	0	0	0	0	0	0	0	0	0	0	0	0	0	0	0	0	0	0	0	0	0	0	0	0	0	0	0	0	0	0	0	0
1.23854114.T_C.clim-bio9	1	23854114	T	C	0.012	SYNONYMOUS_CODING	clim-bio9	AT1G08667	promoter	23853907	23855407	0	0	0	0	0	0	0	0	0	0	0	0	0	0	0	0	0	0	0	0	0	0	0	0	0	0	0	0	0	0	0	0	0	0	0	0	0	0
1.23794654.C_G.clim-bio9	1	23794654	C	G	0.012	INTRON	clim-bio9	AT1G64105	promoter	23794049	23795549	0	0	0	0	0	0	0	0	0	0	0	0	0	0	0	0	0	0	0	0	0	0	0	0	0	0	0	0	0	0	0	0	0	0	0	0	0	0
1.27760983.T_G.clim-bio9	1	27760983	T	G	0.016	INTRON	clim-bio9	AT1G09417	terminator	27760943	27762443	0	0	0	0	0	0	0	0	0	0	0	0	0	0	0	0	0	0	0	0	0	0	0	0	0	0	0	0	0	0	0	0	0	0	0	0	0	0
1.16134952.G_A.clim-tmax12	1	16134952	G	A	0.0738523	NON_SYNONYMOUS_CODING	clim-tmax12	AT1G42990	terminator	16134722	16136222	0	0	0	0	0	0	0	0	0	0	0	0	0	0	0	0	0	0	0	0	0	0	0	0	0	0	0	0	0	0	0	0	0	0	0	0	0	0
1.27699470.C_T.clim-bio9	1	27699470	C	T	0.016	INTERGENIC	clim-bio9	AT1G73670	promoter	27698870	27700370	0	0	0	0	0	0	0	0	0	0	0	0	0	0	0	0	0	0	0	0	0	0	0	0	0	0	0	0	0	0	0	0	0	-1	0	0	0	0
1.13165048.C_T.clim-tmin6	1	13165048	C	T	0.0798403	INTERGENIC	clim-tmin6	AT1G35630	promoter	13164012	13165512	0	0	0	0	0	0	0	0	0	0	0	0	0	0	0	0	0	0	0	0	0	0	0	0	0	0	0	0	0	0	0	0	0	0	0	0	0	0
1.18658157.C_T.clim-tmin6	1	18658157	C	T	0.0179641	INTERGENIC	clim-tmin6	AT1G50360	terminator	18656900	18658400	0	0	0	0	0	0	0	0	0	0	0	0	0	0	0	0	0	0	0	0	0	0	0	0	0	0	0	0	0	0	0	0	0	0	0	0	0	0
1.1541779.T_G.clim-tmin6	1	1541779	T	G	0.0159681	INTRON	clim-tmin6	AT1G05291	terminator	1540347	1541847	0	0	0	0	0	0	0	0	0	0	0	0	0	0	0	0	0	0	0	0	0	0	0	0	0	0	0	0	0	0	0	0	0	0	0	0	0	0
1.1541780.G_A.clim-tmin6	1	1541780	G	A	0.0179641	INTRON	clim-tmin6	AT1G05291	terminator	1540347	1541847	0	0	0	0	0	0	0	0	0	0	0	0	0	0	0	0	0	0	0	0	0	0	0	0	0	0	0	0	0	0	0	0	0	0	0	0	0	0
1.27901483.A_G.clim-tmax3	1	27901483	A	G	0.066	INTERGENIC	clim-tmax3	AT1G09423	promoter	27900761	27902261	0	0	0	0	0	0	0	0	0	0	0	0	0	0	0	0	0	0	0	0	0	0	0	0	0	0	0	0	0	0	0	0	0	0	0	0	0	0
1.27910013.A_C.clim-tmax3	1	27910013	A	C	0.066	.	clim-tmax3	AT1G74210	promoter	27909313	27910813	0	0	0	0	0	0	0	0	0	0	0	0	0	0	0	0	0	0	0	0	0	0	0	0	0	0	0	0	0	0	0	0	0	0	0	0	0	0
1.27879557.G_A.clim-tmax3	1	27879557	G	A	0.066	STOP_GAINED	clim-tmax3	AT1G74140	terminator	27879280	27880780	0	0	0	0	0	0	0	0	0	0	0	0	0	0	0	0	0	0	0	0	0	0	0	0	0	0	0	0	0	0	0	0	0	0	0	0	0	0
1.27850716.G_A.clim-tmax3	1	27850716	G	A	0.068	SYNONYMOUS_CODING	clim-tmax3	AT1G74070	terminator	27850459	27851959	0	0	0	0	0	0	0	0	0	0	0	0	0	0	0	0	0	0	0	0	0	0	0	0	0	0	0	0	0	0	0	0	0	0	0	0	0	0
1.13079320.T_A.clim-aet4	1	13079320	T	A	0.0538922	INTRON	clim-aet4	AT1G35516	terminator	13079273	13080773	0	0	0	0	0	0	0	0	0	0	0	0	0	0	0	0	0	0	0	0	0	0	0	0	0	0	0	0	0	0	0	0	0	0	0	0	0	0
1.27880278.T_C.clim-tmax3	1	27880278	T	C	0.068	INTERGENIC	clim-tmax3	AT1G74140	terminator	27879280	27880780	0	0	0	0	0	0	0	0	0	0	0	0	0	0	0	0	0	0	0	0	0	0	0	0	0	0	0	0	0	0	0	0	0	0	0	0	0	0
1.8976635.C_T.clim-tmax12	1	8976635	C	T	0.0199601	.	clim-tmax12	AT1G25550	promoter	8975325	8976825	0	0	0	0	0	0	0	0	0	0	0	0	0	0	0	0	0	0	0	0	0	0	0	0	0	0	0	0	0	0	0	0	0	0	0	0	0	0
1.3905288.T_G.LD	1	3905288	T	G	0.179641	INTERGENIC	LD	AT1G11608	promoter	3904578	3906078	0	0	0	0	0	0	0	0	0	0	0	0	0	0	0	0	0	0	0	0	0	0	0	0	0	0	0	0	0	0	0	0	0	0	0	0	0	0
1.13449791.G_A.clim-tmax12	1	13449791	G	A	0.0139721	INTERGENIC	clim-tmax12	AT1G36050	promoter	13449088	13450588	0	0	0	0	0	0	0	0	0	0	0	0	0	0	0	0	0	0	0	0	0	0	0	0	0	0	0	0	0	0	0	0	0	0	0	0	0	0
1.13449712.T_A.clim-tmax12	1	13449712	T	A	0.0139721	INTERGENIC	clim-tmax12	AT1G36050	promoter	13449088	13450588	0	0	0	0	0	0	0	0	0	0	0	0	0	0	0	0	0	0	0	0	0	0	0	0	0	0	0	0	0	0	0	0	0	0	0	0	0	0
1.13421651.G_A.clim-tmax12	1	13421651	G	A	0.0139721	INTERGENIC	clim-tmax12	AT1G36000	promoter	13421553	13423053	0	0	0	0	0	0	0	0	0	0	0	0	0	0	0	0	0	0	0	0	0	0	0	0	0	0	0	0	0	0	0	0	0	0	0	0	0	0
1.13432928.T_A.clim-tmax12	1	13432928	T	A	0.0139721	INTERGENIC	clim-tmax12	AT1G36020	terminator	13432918	13434418	0	0	0	0	0	0	0	0	0	0	0	0	0	0	0	0	0	0	0	0	0	0	0	0	0	0	0	0	0	0	0	0	0	0	0	0	0	0
1.13433659.C_T.clim-tmax12	1	13433659	C	T	0.0139721	INTERGENIC	clim-tmax12	AT1G36020	terminator	13432918	13434418	0	0	0	0	0	0	0	0	0	0	0	0	0	0	0	0	0	0	0	0	0	0	0	0	0	0	0	0	0	0	0	0	0	0	0	0	0	0
1.13436209.G_A.clim-tmax12	1	13436209	G	A	0.0139721	INTERGENIC	clim-tmax12	AT1G36030	promoter	13435585	13437085	0	0	0	0	0	0	0	0	0	0	0	0	0	0	0	0	0	0	0	0	0	0	0	0	0	0	0	0	0	0	0	0	0	0	0	0	0	0
1.28894032.T_G.clim-tmin6	1	28894032	T	G	0.011976	INTERGENIC	clim-tmin6	AT1G76920	terminator	28893221	28894721	0	0	0	0	0	0	0	0	0	0	0	0	0	0	0	0	0	0	0	0	0	0	0	0	1	0	0	0	1	0	0	0	0	0	0	0	0	0
1.28902591.G_A.clim-tmin6	1	28902591	G	A	0.011976	UTR_3_PRIME	clim-tmin6	AT1G76940	terminator	28901317	28902817	0	0	0	0	0	0	0	0	0	0	0	0	0	0	0	0	0	0	0	0	0	0	0	0	0	0	0	0	0	0	0	0	0	0	0	0	0	0
1.28906017.A_G.clim-tmin6	1	28906017	A	G	0.011976	INTERGENIC	clim-tmin6	AT1G76950	promoter	28905440	28906940	0	0	0	0	0	0	0	0	0	0	0	0	0	0	0	0	0	0	0	0	0	0	0	0	0	0	0	0	0	0	0	0	0	0	0	0	0	0
1.28911839.T_A.clim-tmin6	1	28911839	T	A	0.011976	INTERGENIC	clim-tmin6	AT1G76950	terminator	28911084	28912584	0	0	0	0	0	0	0	0	0	0	0	0	0	0	0	0	0	0	0	0	0	0	0	0	0	0	0	0	0	0	0	0	0	0	0	0	0	0
1.28880797.A_G.clim-tmin6	1	28880797	A	G	0.011976	INTERGENIC	clim-tmin6	AT1G76900	promoter	28880538	28882038	0	0	0	0	0	0	0	0	0	0	0	0	0	0	0	0	0	0	0	0	0	0	0	0	0	0	0	0	0	0	0	0	0	0	0	0	0	0
1.28815638.A_G.clim-tmin6	1	28815638	A	G	0.011976	INTERGENIC	clim-tmin6	AT1G09673	terminator	28815621	28817121	0	0	0	0	0	0	0	0	0	0	0	0	0	0	0	0	0	0	0	0	0	0	0	0	0	0	0	0	0	0	0	0	0	0	0	0	0	0
1.28889638.T_A.clim-tmin6	1	28889638	T	A	0.011976	INTERGENIC	clim-tmin6	AT1G09693	terminator	28889573	28891073	0	0	0	0	0	0	0	0	0	0	0	0	0	0	0	0	0	0	0	0	0	0	0	0	0	0	0	0	0	0	0	0	0	0	0	0	0	0
1.28891868.T_C.clim-tmin6	1	28891868	T	C	0.011976	INTERGENIC	clim-tmin6	AT1G76920	promoter	28890975	28892475	0	0	0	0	0	0	0	0	0	0	0	0	0	0	0	0	0	0	0	0	0	0	0	0	1	0	0	0	0	0	0	0	0	0	0	0	0	0
1.28897681.A_T.clim-tmin6	1	28897681	A	T	0.011976	INTERGENIC	clim-tmin6	AT1G76930	promoter	28896620	28898120	0	0	0	0	0	0	0	0	0	0	0	0	0	0	0	0	0	0	0	0	0	0	0	0	0	0	0	0	0	0	0	0	0	0	0	0	0	0
1.28830015.C_T.clim-tmin6	1	28830015	C	T	0.011976	UTR_3_PRIME	clim-tmin6	AT1G76800	terminator	28829778	28831278	0	0	0	0	0	0	0	0	0	0	0	0	0	0	0	0	0	0	0	0	0	0	0	0	0	0	0	0	0	0	0	0	0	0	0	0	0	0
1.8515481.T_C.clim-bio1	1	8515481	T	C	0.026	INTERGENIC	clim-bio1	AT1G24070	terminator	8515165	8516665	0	0	0	0	0	0	0	0	0	0	0	0	0	0	0	0	0	0	0	0	0	0	0	0	0	0	0	0	0	0	0	0	0	0	0	0	0	0
1.8350957.C_G.clim-tmax12	1	8350957	C	G	0.0219561	NON_SYNONYMOUS_CODING	clim-tmax12	AT1G23540	promoter	8349568	8351068	0	0	0	0	0	0	0	0	0	0	0	0	0	0	0	0	0	0	0	0	0	0	0	0	0	1	0	0	0	0	0	0	0	0	0	0	0	0
1.8355085.G_T.clim-tmax12	1	8355085	G	T	0.0219561	NON_SYNONYMOUS_CODING	clim-tmax12	AT1G23560	promoter	8354119	8355619	0	0	0	0	0	0	0	0	0	0	0	0	0	0	0	0	0	0	0	0	0	0	0	0	0	0	0	0	0	0	0	0	0	0	0	0	0	0
1.8377683.A_C.clim-tmax12	1	8377683	A	C	0.0219561	NON_SYNONYMOUS_CODING	clim-tmax12	AT1G23680	promoter	8376656	8378156	0	0	0	0	0	0	0	0	0	0	0	0	0	0	0	0	0	0	0	0	0	0	0	0	0	0	0	0	0	0	0	0	0	0	0	0	0	0
1.8361371.G_C.clim-tmax12	1	8361371	G	C	0.0219561	NON_SYNONYMOUS_CODING	clim-tmax12	AT1G23600	terminator	8359977	8361477	0	0	0	0	0	0	0	0	0	0	0	0	0	0	0	0	0	0	0	0	0	0	0	0	0	0	0	0	0	0	0	0	0	0	0	0	0	0
1.8370008.T_A.clim-tmax12	1	8370008	T	A	0.0219561	SYNONYMOUS_CODING	clim-tmax12	AT1G23645	promoter	8369840	8371340	0	0	0	0	0	0	0	0	0	0	0	0	0	0	0	0	0	0	0	0	0	0	0	0	0	0	0	0	0	0	0	0	0	0	0	0	0	0
1.8361993.T_A.clim-tmax12	1	8361993	T	A	0.0219561	INTRON	clim-tmax12	AT1G23600	promoter	8361985	8363485	0	0	0	0	0	0	0	0	0	0	0	0	0	0	0	0	0	0	0	0	0	-1	0	0	0	0	0	0	0	0	0	0	0	0	0	0	0	0
1.8377304.T_A.clim-tmax12	1	8377304	T	A	0.0219561	UTR_3_PRIME	clim-tmax12	AT1G23680	promoter	8376656	8378156	0	0	0	0	0	0	0	0	0	-1	0	0	0	0	0	0	0	0	0	0	0	0	0	0	0	0	0	0	0	0	0	0	0	0	0	0	0	0
1.8382064.A_G.clim-tmax12	1	8382064	A	G	0.0219561	INTERGENIC	clim-tmax12	AT1G23700	promoter	8381790	8383290	0	0	0	0	0	0	0	0	0	0	0	0	0	0	0	0	0	0	0	0	0	0	0	0	0	0	0	0	0	0	0	0	0	0	0	0	0	0
1.27613625.G_A.clim-tmax10	1	27613625	G	A	0.0179641	INTERGENIC	clim-tmax10	AT1G73440	terminator	27612315	27613815	0	0	0	0	0	0	0	0	0	0	0	0	0	0	0	0	0	0	0	0	0	0	0	0	0	0	0	0	0	0	0	0	0	0	0	0	0	0
1.27632649.G_A.clim-tmax10	1	27632649	G	A	0.0179641	UTR_3_PRIME	clim-tmax10	AT1G73480	terminator	27632340	27633840	0	0	0	0	0	0	0	0	0	0	0	0	0	0	0	0	0	0	0	0	0	0	0	0	0	0	0	0	0	0	0	0	0	0	0	0	0	0
1.1021637.T_A.clim-bio9	1	1021637	T	A	0.084	INTRON	clim-bio9	AT1G03980	promoter	1021608	1023108	0	0	0	0	0	0	0	0	0	0	1	0	0	0	0	0	0	0	0	0	0	0	0	0	0	0	0	0	0	0	0	0	0	0	0	0	0	0
1.23890376.G_A.clim-gs8	1	23890376	G	A	0.0199601	INTERGENIC	clim-gs8	AT1G64380	terminator	23889569	23891069	0	0	0	0	0	0	0	0	0	0	0	0	0	0	0	0	0	0	0	0	0	0	0	0	0	0	0	0	0	0	0	0	0	0	0	0	0	0
1.23890257.A_G.clim-gs8	1	23890257	A	G	0.0199601	INTERGENIC	clim-gs8	AT1G64380	terminator	23889569	23891069	0	0	0	0	0	0	0	0	0	0	0	0	0	0	0	0	0	0	0	0	0	0	0	0	0	0	0	0	0	0	0	0	0	0	0	0	0	0
1.23885862.T_G.clim-gs8	1	23885862	T	G	0.0199601	INTERGENIC	clim-gs8	AT1G64355	promoter	23884981	23886481	0	0	0	0	0	0	0	0	0	0	0	0	0	0	0	0	0	0	0	0	0	0	0	0	0	0	0	0	0	0	0	0	0	0	0	0	0	0
1.23886308.G_A.clim-gs8	1	23886308	G	A	0.0199601	NON_SYNONYMOUS_CODING	clim-gs8	AT1G64355	promoter	23884981	23886481	0	0	0	0	0	0	0	0	0	0	0	0	0	0	0	0	0	0	0	0	0	0	0	0	0	0	0	0	0	0	0	0	0	0	0	0	0	0
1.23889884.T_A.clim-gs8	1	23889884	T	A	0.0199601	INTERGENIC	clim-gs8	AT1G64380	terminator	23889569	23891069	0	0	0	0	0	0	0	0	0	0	0	0	0	0	0	0	0	0	0	0	0	0	0	0	0	0	0	0	0	0	0	0	0	0	0	0	0	0
1.23875068.A_G.clim-gs8	1	23875068	A	G	0.0199601	INTERGENIC	clim-gs8	AT1G64330	terminator	23873701	23875201	0	0	0	0	0	0	0	0	0	0	0	0	0	0	0	0	0	0	0	0	0	0	0	0	0	0	0	0	0	0	0	0	0	0	0	0	0	0
1.23881247.A_G.clim-gs8	1	23881247	A	G	0.0199601	INTERGENIC	clim-gs8	AT1G64340	terminator	23880573	23882073	0	0	0	0	0	0	0	0	0	0	0	0	0	0	0	0	0	0	0	0	0	0	0	0	0	0	0	0	0	0	0	0	0	0	0	0	0	0
1.1524449.A_G.clim-tmin6	1	1524449	A	G	0.0139721	INTERGENIC	clim-tmin6	AT1G04363	terminator	1523443	1524943	0	0	0	0	0	0	0	0	0	0	0	0	0	0	0	0	0	0	0	0	0	0	0	0	0	0	0	0	0	0	0	0	0	0	0	0	0	0
1.9332044.G_A.clim-bio8	1	9332044	G	A	0.0239521	INTERGENIC	clim-bio8	AT1G26921	promoter	9330701	9332201	0	0	0	0	0	0	0	0	0	0	0	0	0	0	0	0	0	0	0	0	0	0	0	0	0	0	0	0	0	0	0	0	0	0	0	0	0	0
1.27975813.A_T.clim-tmax3	1	27975813	A	T	0.068	INTRON	clim-tmax3	AT1G74440	terminator	27975501	27977001	0	0	0	0	0	0	0	0	0	0	0	0	0	0	0	0	0	0	0	0	0	0	0	0	0	0	0	0	0	0	0	0	0	0	0	0	0	0
1.27944028.A_C.clim-tmax3	1	27944028	A	C	0.068	INTRON	clim-tmax3	AT1G74320	terminator	27942704	27944204	0	0	0	0	0	0	0	0	0	1	0	0	0	0	0	0	0	0	0	0	0	0	0	0	0	0	0	0	0	0	0	0	0	0	0	0	0	0
1.8200327.C_G.clim-bio9	1	8200327	C	G	0.014	INTERGENIC	clim-bio9	AT1G23120	terminator	8199116	8200616	0	0	0	0	0	0	0	0	0	0	0	0	0	0	0	0	0	0	0	0	0	0	0	0	0	0	0	0	0	0	0	0	0	0	0	0	0	0
1.8200698.T_C.clim-bio9	1	8200698	T	C	0.014	INTRON	clim-bio9	AT1G23130	promoter	8199320	8200820	0	0	0	0	0	0	0	0	0	0	0	0	0	0	0	0	0	0	0	0	0	0	0	0	0	0	0	0	0	0	0	0	0	0	0	0	0	0
1.8200892.A_C.clim-bio9	1	8200892	A	C	0.014	NON_SYNONYMOUS_CODING	clim-bio9	AT1G23130	terminator	8200746	8202246	0	0	0	0	0	0	0	0	0	0	0	0	0	0	0	0	0	0	0	0	0	0	0	0	0	0	0	0	0	0	0	0	0	0	0	0	0	0
1.8200307.T_G.clim-bio9	1	8200307	T	G	0.014	INTERGENIC	clim-bio9	AT1G23120	terminator	8199116	8200616	0	0	0	0	0	0	0	0	0	0	0	0	0	0	0	0	0	0	0	0	0	0	0	0	0	0	0	0	0	0	0	0	0	0	0	0	0	0
1.8200619.A_T.clim-bio9	1	8200619	A	T	0.014	SYNONYMOUS_CODING	clim-bio9	AT1G23130	promoter	8199320	8200820	0	0	0	0	0	0	0	0	0	0	0	0	0	0	0	0	0	0	0	0	0	0	0	0	0	0	0	0	0	0	0	0	0	0	0	0	0	0
1.8200903.G_A.clim-bio9	1	8200903	G	A	0.014	NON_SYNONYMOUS_CODING	clim-bio9	AT1G23130	terminator	8200746	8202246	0	0	0	0	0	0	0	0	0	0	0	0	0	0	0	0	0	0	0	0	0	0	0	0	0	0	0	0	0	0	0	0	0	0	0	0	0	0
1.8200513.T_A.clim-bio9	1	8200513	T	A	0.014	NON_SYNONYMOUS_CODING	clim-bio9	AT1G23120	terminator	8199116	8200616	0	0	0	0	0	0	0	0	0	0	0	0	0	0	0	0	0	0	0	0	0	0	0	0	0	0	0	0	0	0	0	0	0	0	0	0	0	0
1.13165349.T_A.clim-tmin6	1	13165349	T	A	0.0758483	INTERGENIC	clim-tmin6	AT1G35630	promoter	13164012	13165512	0	0	0	0	0	0	0	0	0	0	0	0	0	0	0	0	0	0	0	0	0	0	0	0	0	0	0	0	0	0	0	0	0	0	0	0	0	0
1.2909755.T_C.ScalingExponent	1	2909755	T	C	0.0309524	INTERGENIC	ScalingExponent	AT1G09030	promoter	2908532	2910032	0	0	0	0	0	0	0	0	0	0	0	0	0	0	0	0	0	0	0	0	0	0	0	0	0	0	0	0	0	0	0	0	0	0	0	0	0	0
1.12398635.C_A.clim-tmax12	1	12398635	C	A	0.0319361	UTR_3_PRIME	clim-tmax12	AT1G34065	terminator	12397427	12398927	0	0	0	0	0	0	0	0	0	0	0	0	0	0	0	0	0	0	0	0	0	0	0	0	0	0	0	0	0	0	0	0	0	0	0	0	0	0
1.12398528.A_T.clim-tmax12	1	12398528	A	T	0.0319361	UTR_3_PRIME	clim-tmax12	AT1G34065	terminator	12397427	12398927	0	0	0	0	0	0	0	0	0	-1	0	0	0	0	0	0	0	0	0	0	0	0	0	0	0	0	0	0	0	0	0	0	0	0	0	0	0	0
1.3897858.A_G.LD	1	3897858	A	G	0.179641	INTERGENIC	LD	AT1G11593	promoter	3897001	3898501	0	0	0	0	0	0	0	0	0	0	0	0	0	0	0	0	0	0	0	0	0	0	0	1	0	0	0	0	0	0	0	0	0	0	0	0	0	0
1.3892315.A_C.LD	1	3892315	A	C	0.179641	INTERGENIC	LD	AT1G11590	promoter	3891579	3893079	0	0	0	0	0	0	0	0	0	0	0	0	0	0	0	0	0	0	0	0	0	0	0	0	0	0	0	0	0	0	0	0	0	0	0	0	0	0
1.3897522.T_A.LD	1	3897522	T	A	0.179641	INTERGENIC	LD	AT1G11593	promoter	3897001	3898501	0	0	0	0	0	0	0	0	0	0	0	0	0	0	0	0	0	0	0	0	0	0	0	0	0	0	0	0	0	0	0	0	0	0	0	0	0	0
1.3897796.T_A.LD	1	3897796	T	A	0.179641	INTERGENIC	LD	AT1G11593	promoter	3897001	3898501	0	0	0	0	0	0	0	0	0	0	0	0	0	0	0	0	0	0	0	0	0	1	0	1	0	0	0	0	0	0	0	0	0	0	0	0	0	0
1.3899408.G_A.LD	1	3899408	G	A	0.179641	INTRAGENIC	LD	AT1G11593	terminator	3898109	3899609	0	0	0	0	0	0	0	0	0	0	0	0	0	0	0	0	0	0	0	0	0	0	0	0	0	0	0	0	0	0	0	0	0	0	0	0	0	0
1.3899469.G_C.LD	1	3899469	G	C	0.179641	INTRAGENIC	LD	AT1G11593	terminator	3898109	3899609	0	0	0	0	0	0	0	0	0	0	0	0	0	0	0	0	0	0	0	0	0	0	0	0	0	0	0	0	0	0	0	0	0	0	0	0	0	0
1.3904701.T_G.LD	1	3904701	T	G	0.179641	INTERGENIC	LD	AT1G11600	terminator	3903395	3904895	0	0	0	0	0	0	0	0	0	0	0	0	0	0	0	0	0	0	0	0	0	0	0	0	0	0	0	0	0	0	0	0	0	1	0	0	0	0
1.3894621.T_C.LD	1	3894621	T	C	0.179641	UTR_3_PRIME	LD	AT1G11590	terminator	3894177	3895677	0	0	0	0	0	0	0	0	0	0	0	0	0	0	0	0	0	0	0	0	0	0	0	0	0	0	0	0	0	0	0	0	0	0	0	0	0	0
1.3895228.G_A.LD	1	3895228	G	A	0.179641	.	LD	AT1G11590	terminator	3894177	3895677	0	0	0	0	0	0	0	0	0	0	0	0	0	0	0	0	0	0	0	0	0	0	0	0	0	0	0	0	0	0	0	0	0	0	0	0	0	0
1.3897619.C_T.LD	1	3897619	C	T	0.179641	INTERGENIC	LD	AT1G11593	promoter	3897001	3898501	0	0	0	0	0	0	0	0	0	0	0	0	0	0	0	0	0	0	0	0	0	0	0	0	0	0	0	0	0	0	0	0	0	0	0	0	0	0
1.3897953.C_T.LD	1	3897953	C	T	0.179641	INTERGENIC	LD	AT1G11593	promoter	3897001	3898501	0	0	0	0	0	0	0	0	0	0	0	0	0	0	0	0	0	0	0	0	0	0	0	0	0	0	0	0	0	0	0	0	0	0	0	0	0	0
1.20170118.A_T.clim-bio1	1	20170118	A	T	0.012	INTRAGENIC	clim-bio1	AT1G54030	terminator	20169184	20170684	0	0	0	0	0	0	0	0	0	0	0	0	0	0	0	0	0	0	0	0	0	0	0	0	0	0	0	0	0	0	0	0	0	1	0	0	0	0
1.27936323.A_G.clim-tmax6	1	27936323	A	G	0.011976	NON_SYNONYMOUS_CODING	clim-tmax6	AT1G74300	terminator	27936108	27937608	0	0	0	0	0	0	0	0	0	0	0	0	0	0	0	0	0	0	0	0	0	0	0	0	0	0	0	0	0	0	0	0	0	0	0	0	0	0
1.8200524.C_T.clim-bio9	1	8200524	C	T	0.016	NON_SYNONYMOUS_CODING	clim-bio9	AT1G23120	terminator	8199116	8200616	0	0	0	0	0	0	0	0	0	0	0	0	0	0	0	0	0	0	0	0	0	0	0	0	0	0	0	0	0	0	0	0	0	0	0	0	0	0
1.1084762.A_T.clim-bio9	1	1084762	A	T	0.04	INTERGENIC	clim-bio9	AT1G04150	promoter	1083931	1085431	0	0	0	0	0	0	0	0	0	0	0	0	0	0	0	0	0	0	0	0	0	0	0	0	0	0	0	0	0	0	0	0	0	0	0	0	0	0
1.1106045.A_G.clim-bio9	1	1106045	A	G	0.04	INTERGENIC	clim-bio9	AT1G04180	terminator	1105741	1107241	0	0	0	0	0	0	0	0	0	0	0	0	0	0	0	0	0	0	0	0	0	0	0	0	0	0	0	0	0	0	0	0	0	0	0	0	0	0
1.15936554.T_A.clim-tmax12	1	15936554	T	A	0.0718563	INTRON	clim-tmax12	AT1G42480	promoter	15935155	15936655	0	0	0	0	0	0	0	0	0	0	0	0	0	0	0	0	0	0	0	0	0	0	0	0	0	0	0	0	0	0	0	0	0	0	0	0	0	0
1.2335607.T_C.clim-bio8	1	2335607	T	C	0.0219561	INTERGENIC	clim-bio8	AT1G07590	terminator	2335476	2336976	0	0	0	0	0	0	0	0	0	0	0	0	0	0	0	0	0	0	0	0	0	0	0	0	0	0	0	0	0	0	0	0	0	0	0	0	0	0
1.2335395.A_G.clim-bio8	1	2335395	A	G	0.0219561	INTERGENIC	clim-bio8	AT1G04597	terminator	2334099	2335599	0	0	0	0	0	0	0	0	0	0	0	0	0	0	0	0	0	0	0	0	0	0	0	0	0	0	0	0	0	0	0	0	0	0	0	0	0	0
1.2335421.T_A.clim-bio8	1	2335421	T	A	0.0219561	INTERGENIC	clim-bio8	AT1G04597	terminator	2334099	2335599	0	0	0	0	0	0	0	0	0	0	0	0	0	0	0	0	0	0	0	0	0	0	0	0	1	0	0	0	0	0	0	0	0	0	0	0	0	0
1.11177687.T_A.clim-bio9	1	11177687	T	A	0.022	INTERGENIC	clim-bio9	AT1G31270	promoter	11177348	11178848	0	0	0	0	0	0	0	0	0	0	0	0	0	0	0	0	0	0	0	0	0	-1	0	0	0	0	0	0	0	0	0	0	0	0	0	0	0	0
1.947229.G_A.clim-bio9	1	947229	G	A	0.06	NON_SYNONYMOUS_CODING	clim-bio9	AT1G03770	terminator	947182	948682	0	0	0	0	0	0	0	0	0	0	0	0	0	0	0	0	0	0	0	0	0	0	0	0	0	0	0	0	0	0	0	0	0	0	0	0	0	0
1.3239269.T_C.clim-aet4	1	3239269	T	C	0.0379242	UTR_5_PRIME	clim-aet4	AT1G09940	promoter	3239054	3240554	0	0	0	0	0	0	0	0	0	0	0	0	0	0	0	0	0	0	0	0	0	0	0	0	0	0	0	0	0	0	0	0	0	0	0	0	0	0
1.27750192.G_T.clim-bio9	1	27750192	G	T	0.016	INTERGENIC	clim-bio9	AT1G73805	promoter	27748748	27750248	0	0	0	0	0	0	0	0	0	0	0	0	0	0	0	0	0	0	0	0	0	0	0	0	0	0	0	0	0	0	0	0	0	0	0	0	0	0
1.24233513.G_T.Co59	1	24233513	G	T	0.0752688	INTERGENIC	Co59	AT1G65240	promoter	24233023	24234523	0	0	0	0	0	0	0	0	0	0	0	0	0	0	0	0	0	0	0	0	0	0	0	0	0	0	0	0	0	0	0	0	0	0	0	0	0	0
1.24233083.A_G.Co59	1	24233083	A	G	0.0752688	INTRON	Co59	AT1G65240	promoter	24233023	24234523	0	0	0	0	0	0	0	0	0	0	0	0	0	0	0	0	0	0	0	0	0	0	0	0	0	0	0	0	0	0	0	0	0	0	0	0	0	0
1.24233700.A_T.Co59	1	24233700	A	T	0.0752688	INTERGENIC	Co59	AT1G65240	promoter	24233023	24234523	0	0	0	0	0	0	0	0	0	0	0	0	0	0	0	0	0	0	0	0	0	0	0	0	0	0	0	0	0	0	0	0	0	0	0	0	0	0
1.27534186.A_T.clim-tmin7	1	27534186	A	T	0.011976	INTERGENIC	clim-tmin7	AT1G09373	terminator	27533532	27535032	0	0	0	0	0	0	0	0	0	0	0	0	0	0	0	0	0	0	0	0	0	0	0	0	0	0	0	0	0	0	0	0	0	0	0	0	0	0
1.960792.G_A.clim-bio9	1	960792	G	A	0.036	INTERGENIC	clim-bio9	AT1G03830	terminator	960683	962183	0	0	0	0	0	0	0	0	0	0	0	0	0	0	0	0	0	0	0	0	0	0	0	0	0	0	0	0	0	0	0	0	0	0	0	0	0	0
1.971017.A_G.clim-bio9	1	971017	A	G	0.036	INTERGENIC	clim-bio9	AT1G03840	promoter	969834	971334	0	0	0	0	0	0	0	0	0	0	0	0	0	0	0	0	0	0	0	0	0	0	0	0	0	0	0	0	0	0	0	0	0	0	0	0	0	0
1.16235808.T_A.clim-bio9	1	16235808	T	A	0.08	NON_SYNONYMOUS_CODING	clim-bio9	AT1G43140	terminator	16235609	16237109	0	0	0	0	0	0	0	0	0	0	0	0	0	0	0	0	0	0	0	0	0	0	0	0	0	0	0	0	0	0	0	0	0	0	0	0	0	0
1.16266820.C_A.clim-bio9	1	16266820	C	A	0.08	INTRON	clim-bio9	AT1G43170	promoter	16265552	16267052	0	0	0	0	0	0	0	0	0	0	0	0	0	0	0	0	0	0	0	0	0	0	0	0	0	0	0	0	0	0	0	0	0	0	0	0	0	0
1.16268616.C_T.clim-bio9	1	16268616	C	T	0.08	SYNONYMOUS_CODING	clim-bio9	AT1G43170	terminator	16268445	16269945	0	0	0	0	0	0	0	0	0	0	0	0	0	0	0	0	0	0	0	0	0	0	0	0	0	0	0	0	0	0	0	0	0	0	0	0	0	0
1.16268954.C_T.clim-bio9	1	16268954	C	T	0.08	INTERGENIC	clim-bio9	AT1G43170	terminator	16268445	16269945	0	0	0	0	0	0	0	0	0	0	0	0	0	0	0	0	0	0	0	0	0	0	0	0	0	0	0	0	0	0	0	0	0	0	0	0	0	0
1.16268330.T_A.clim-bio9	1	16268330	T	A	0.08	INTRON	clim-bio9	AT1G43171	promoter	16268074	16269574	0	0	0	0	0	0	0	0	0	0	0	0	0	0	0	0	0	0	0	0	0	0	0	0	0	0	0	0	0	0	0	0	0	0	0	0	0	0
1.16268098.A_G.clim-bio9	1	16268098	A	G	0.08	SYNONYMOUS_CODING	clim-bio9	AT1G43171	promoter	16268074	16269574	0	0	0	0	0	0	0	0	0	0	0	1	0	0	0	0	0	0	0	0	0	0	0	0	0	0	0	0	0	0	0	0	0	0	0	0	0	0
1.11711767.C_T.As75	1	11711767	C	T	0.0860215	INTERGENIC	As75	AT1G32440	promoter	11710943	11712443	0	0	0	0	0	0	0	0	0	0	0	0	0	0	0	0	0	0	0	0	0	0	0	0	0	0	0	0	0	0	0	0	0	0	0	0	0	0
1.11711035.C_T.As75	1	11711035	C	T	0.0860215	INTERGENIC	As75	AT1G32440	promoter	11710943	11712443	0	0	0	0	0	0	0	0	0	0	0	0	0	0	0	0	0	0	0	0	0	0	0	0	0	0	0	0	0	0	0	0	0	0	0	0	0	0
1.16139545.T_A.clim-tmax12	1	16139545	T	A	0.0718563	INTERGENIC	clim-tmax12	AT1G43000	promoter	16139525	16141025	0	0	0	0	0	0	0	0	0	0	0	0	0	0	0	0	0	0	0	0	0	0	0	0	0	0	0	0	0	0	0	0	0	0	0	0	0	0
1.23155465.G_A.clim-gs8	1	23155465	G	A	0.0139721	UTR_3_PRIME	clim-gs8	AT1G62540	terminator	23155228	23156728	0	0	0	0	0	0	0	0	0	0	0	0	0	0	0	0	0	0	0	0	0	0	0	0	0	0	0	0	0	0	0	0	0	0	0	0	0	0
1.8508898.A_G.clim-bio1	1	8508898	A	G	0.05	INTERGENIC	clim-bio1	AT1G24060	terminator	8508735	8510235	0	0	0	0	0	0	0	0	0	0	-1	0	0	0	0	0	0	0	0	0	0	0	0	0	0	0	0	0	0	0	0	0	0	0	0	0	0	0
1.27869296.C_T.clim-tmax3	1	27869296	C	T	0.078	INTERGENIC	clim-tmax3	AT1G74110	promoter	27867868	27869368	0	0	0	0	0	0	0	0	0	0	0	0	0	0	0	0	0	0	0	0	0	0	0	0	0	0	0	0	0	0	0	0	0	0	0	0	0	0
1.11167182.A_T.clim-prec7	1	11167182	A	T	0.0199601	INTRON	clim-prec7	AT1G31250	promoter	11167047	11168547	0	0	0	0	0	0	0	0	0	0	0	0	0	0	0	0	0	0	0	0	0	0	0	0	0	0	0	0	0	0	0	0	0	0	0	0	0	0
1.3909064.G_A.LD	1	3909064	G	A	0.167665	SYNONYMOUS_CODING	LD	AT1G11610	promoter	3908838	3910338	0	0	0	0	0	0	0	0	0	0	0	0	0	0	0	0	0	0	0	0	0	0	0	0	0	0	0	0	0	0	0	0	0	0	0	0	0	0
1.8354425.C_G.clim-tmax12	1	8354425	C	G	0.0239521	INTERGENIC	clim-tmax12	AT1G23560	promoter	8354119	8355619	0	0	-1	0	0	0	0	0	0	0	0	0	0	0	0	0	0	0	0	0	0	0	0	0	0	0	0	0	-1	0	0	0	0	0	0	0	0	0
1.29424565.C_T.clim-aet11	1	29424565	C	T	0.125749	INTERGENIC	clim-aet11	AT1G78210	promoter	29424089	29425589	0	0	0	0	0	0	0	0	0	0	0	0	0	0	0	0	0	0	0	0	0	0	0	0	0	0	0	0	0	0	0	0	0	0	0	0	0	0
1.8756741.C_T.clim-tmin7	1	8756741	C	T	0.0279441	INTERGENIC	clim-tmin7	AT1G05913	promoter	8756070	8757570	0	0	0	0	0	0	0	0	0	0	0	0	0	0	0	0	0	0	0	0	0	0	0	0	0	0	0	0	0	0	0	0	0	0	0	0	0	0
1.8755401.C_T.clim-tmin7	1	8755401	C	T	0.0279441	UTR_3_PRIME	clim-tmin7	AT1G24706	terminator	8755104	8756604	0	0	0	0	0	0	0	0	0	0	0	0	0	0	0	0	0	0	0	0	0	0	0	0	0	0	0	0	0	0	0	0	0	0	0	0	0	0
1.25008598.G_C.clim-bio9	1	25008598	G	C	0.014	INTERGENIC	clim-bio9	AT1G67000	promoter	25007147	25008647	0	0	0	0	0	0	0	0	0	0	0	0	0	0	0	0	0	0	0	0	0	0	0	0	0	0	0	0	0	0	0	0	0	0	0	0	0	0
1.25008568.T_A.clim-bio9	1	25008568	T	A	0.014	INTERGENIC	clim-bio9	AT1G67000	promoter	25007147	25008647	0	0	0	0	0	0	0	0	0	1	0	0	0	0	0	0	0	0	0	0	0	0	0	0	0	0	0	0	0	0	0	0	0	0	0	0	0	0
1.24598414.C_T.clim-bio10	1	24598414	C	T	0.0219561	UTR_5_PRIME	clim-bio10	AT1G66070	promoter	24598131	24599631	0	0	0	0	0	0	0	0	0	0	0	0	0	0	0	0	0	0	0	0	0	0	0	0	0	0	0	0	0	0	0	0	0	0	0	0	0	0
1.27759275.A_G.clim-tmax3	1	27759275	A	G	0.07	INTERGENIC	clim-tmax3	AT1G73830	promoter	27758940	27760440	0	0	0	0	0	0	0	0	0	0	0	0	0	0	0	0	0	0	0	0	0	0	0	0	0	0	0	0	0	0	0	0	0	0	0	0	0	0
1.8209133.T_A.clim-tmax12	1	8209133	T	A	0.0219561	INTERGENIC	clim-tmax12	AT1G23160	promoter	8208225	8209725	0	0	0	0	0	0	0	0	0	0	0	0	0	0	0	0	0	0	0	0	0	0	0	0	0	0	0	0	0	0	0	0	0	0	0	0	0	0
1.8231237.C_T.clim-tmax12	1	8231237	C	T	0.0219561	INTERGENIC	clim-tmax12	AT1G23201	terminator	8230478	8231978	0	0	0	0	0	0	0	0	0	0	0	0	0	0	0	0	0	0	0	0	0	0	0	0	0	0	0	0	0	0	0	0	0	0	0	0	0	0
1.8233328.G_A.clim-tmax12	1	8233328	G	A	0.0219561	INTERGENIC	clim-tmax12	AT1G23205	terminator	8232952	8234452	0	0	0	0	0	0	0	0	0	0	0	0	0	0	0	0	0	0	0	0	0	0	0	0	0	0	0	0	0	0	0	0	0	0	0	0	0	0
1.8235485.A_C.clim-tmax12	1	8235485	A	C	0.0219561	INTERGENIC	clim-tmax12	AT1G23205	promoter	8234519	8236019	0	0	0	0	0	0	0	0	0	0	0	0	0	0	0	0	0	0	0	0	0	0	0	0	0	0	0	0	0	0	0	0	0	0	0	0	0	0
1.8267708.A_T.clim-tmax12	1	8267708	A	T	0.0219561	INTERGENIC	clim-tmax12	AT1G23310	terminator	8267384	8268884	0	0	0	0	0	0	0	0	0	0	0	0	0	0	0	0	0	0	0	0	0	0	0	0	0	0	0	0	0	0	0	0	0	0	0	0	0	0
1.8273753.G_A.clim-tmax12	1	8273753	G	A	0.0219561	NON_SYNONYMOUS_CODING	clim-tmax12	AT1G23320	terminator	8272422	8273922	0	0	0	0	0	0	0	0	0	0	0	0	0	0	0	0	0	0	0	0	0	0	0	0	0	0	0	0	0	0	0	0	0	0	0	0	0	0
1.8211607.G_A.clim-tmax12	1	8211607	G	A	0.0219561	INTERGENIC	clim-tmax12	AT1G23160	terminator	8210986	8212486	0	0	0	0	0	0	0	0	0	0	0	0	0	0	0	0	0	0	0	0	0	0	0	0	0	0	0	0	0	0	0	0	0	0	0	0	0	0
1.8219139.A_G.clim-tmax12	1	8219139	A	G	0.0219561	NON_SYNONYMOUS_CODING	clim-tmax12	AT1G23190	promoter	8218807	8220307	0	0	0	0	0	0	0	0	0	0	0	0	0	0	0	0	0	0	0	0	0	0	0	0	0	0	0	0	0	0	0	0	0	0	0	0	0	0
1.8272869.A_T.clim-tmax12	1	8272869	A	T	0.0219561	INTERGENIC	clim-tmax12	AT1G23310	promoter	8271521	8273021	0	0	0	0	0	0	0	0	0	0	0	0	0	0	0	0	0	0	0	0	0	0	0	0	0	0	0	0	0	0	0	0	0	0	0	0	0	0
1.8282987.G_A.clim-tmax12	1	8282987	G	A	0.0219561	INTERGENIC	clim-tmax12	AT1G23330	promoter	8281921	8283421	0	0	0	0	0	0	0	0	0	0	0	0	0	0	0	0	0	0	0	0	0	0	0	0	0	0	0	0	0	0	0	0	0	0	0	0	0	0
1.8292030.G_T.clim-tmax12	1	8292030	G	T	0.0219561	INTERGENIC	clim-tmax12	AT1G23350	terminator	8292019	8293519	0	0	0	0	0	0	0	0	0	0	0	0	0	0	0	0	0	0	0	0	0	0	0	0	0	0	0	0	0	0	0	0	0	0	0	0	0	0
1.8268456.C_A.clim-tmax12	1	8268456	C	A	0.0219561	UTR_3_PRIME	clim-tmax12	AT1G23310	terminator	8267384	8268884	0	0	0	0	0	0	0	0	0	0	0	0	0	0	0	0	0	0	0	0	0	0	0	0	0	0	0	0	0	0	0	0	0	0	0	0	0	0
1.8273043.A_G.clim-tmax12	1	8273043	A	G	0.0219561	INTERGENIC	clim-tmax12	AT1G23320	terminator	8272422	8273922	0	0	0	0	0	0	0	0	0	0	0	0	0	0	0	0	0	0	0	0	0	0	0	0	0	0	0	0	0	0	0	0	0	0	0	0	0	0
1.8273386.G_A.clim-tmax12	1	8273386	G	A	0.0219561	INTERGENIC	clim-tmax12	AT1G23320	terminator	8272422	8273922	0	0	0	0	0	0	0	0	0	0	0	0	0	0	0	0	0	0	0	0	0	1	0	0	0	0	0	0	0	0	0	0	0	0	0	0	0	0
1.8283033.T_C.clim-tmax12	1	8283033	T	C	0.0219561	INTERGENIC	clim-tmax12	AT1G23330	promoter	8281921	8283421	0	0	0	0	0	0	0	0	0	0	0	0	0	0	0	0	0	0	0	0	0	0	0	0	0	0	0	0	0	0	0	0	0	0	0	0	0	0
1.8283294.C_T.clim-tmax12	1	8283294	C	T	0.0219561	INTERGENIC	clim-tmax12	AT1G23330	promoter	8281921	8283421	0	0	0	0	0	0	0	0	0	0	0	0	0	0	0	0	0	0	0	0	0	0	0	0	0	0	0	1	0	0	0	0	0	0	0	0	0	0
1.8292394.G_A.clim-tmax12	1	8292394	G	A	0.0219561	INTERGENIC	clim-tmax12	AT1G23350	terminator	8292019	8293519	0	0	0	0	0	0	0	0	0	0	0	0	0	0	0	0	0	0	0	0	0	0	0	0	0	0	0	0	0	0	0	0	0	0	0	0	0	0
1.8293806.T_G.clim-tmax12	1	8293806	T	G	0.0219561	NON_SYNONYMOUS_CODING	clim-tmax12	AT1G23350	promoter	8293764	8295264	0	0	0	0	0	0	0	0	0	0	0	0	0	0	0	0	0	0	0	0	0	0	0	0	0	0	0	0	0	0	0	0	0	0	0	0	0	0
1.8208446.T_A.clim-tmax12	1	8208446	T	A	0.0219561	INTERGENIC	clim-tmax12	AT1G23160	promoter	8208225	8209725	0	0	0	0	0	0	0	0	0	0	0	0	0	0	0	0	0	0	0	0	0	0	0	0	0	0	0	0	0	0	0	0	0	0	0	0	0	0
1.8215750.T_G.clim-tmax12	1	8215750	T	G	0.0219561	UTR_3_PRIME	clim-tmax12	AT1G23170	terminator	8215307	8216807	0	0	0	0	0	0	0	0	0	0	0	0	0	0	0	0	0	0	0	0	0	0	0	0	0	0	0	0	0	0	0	0	0	0	0	0	0	0
1.8235217.A_G.clim-tmax12	1	8235217	A	G	0.0219561	INTERGENIC	clim-tmax12	AT1G23205	promoter	8234519	8236019	0	0	0	0	0	0	0	0	0	0	0	0	0	0	0	0	0	0	0	0	0	0	0	0	0	0	0	0	0	0	0	0	0	0	0	0	0	0
1.8242551.T_C.clim-tmax12	1	8242551	T	C	0.0219561	UTR_5_PRIME	clim-tmax12	AT1G23210	terminator	8241761	8243261	0	0	0	0	0	-1	0	0	0	0	0	0	0	0	0	0	0	0	0	0	0	0	0	0	0	0	0	0	0	0	0	0	0	0	0	0	0	0
1.8276006.C_T.clim-tmax12	1	8276006	C	T	0.0219561	INTERGENIC	clim-tmax12	AT1G23320	promoter	8274850	8276350	0	0	0	0	0	0	0	0	0	0	0	0	0	0	0	0	0	0	0	0	0	0	0	0	0	0	0	0	0	0	0	0	0	0	0	0	0	0
1.8219497.C_A.clim-tmax12	1	8219497	C	A	0.0219561	SYNONYMOUS_CODING	clim-tmax12	AT1G23190	promoter	8218807	8220307	0	0	0	0	0	0	0	0	0	0	0	0	0	0	0	0	0	0	0	0	0	0	0	0	0	0	0	0	0	0	0	0	0	0	0	0	0	0
1.8224420.T_C.clim-tmax12	1	8224420	T	C	0.0219561	UTR_3_PRIME	clim-tmax12	AT1G23190	terminator	8224047	8225547	0	0	0	0	0	0	0	0	0	0	0	0	0	0	0	0	0	0	0	0	0	0	0	0	0	0	0	0	0	0	0	0	0	0	0	0	0	0
1.8226716.T_C.clim-tmax12	1	8226716	T	C	0.0219561	INTERGENIC	clim-tmax12	AT1G23200	promoter	8226132	8227632	0	0	0	0	0	0	0	0	0	0	0	0	0	0	0	0	0	0	0	0	0	0	0	0	0	0	0	0	0	0	0	0	0	0	0	0	0	0
1.8229713.T_A.clim-tmax12	1	8229713	T	A	0.0219561	INTERGENIC	clim-tmax12	AT1G23201	promoter	8229046	8230546	0	0	0	0	0	0	0	0	0	0	0	0	1	0	0	0	0	0	0	0	0	0	0	0	0	0	0	0	0	0	0	1	0	0	0	0	0	0
1.8231236.T_A.clim-tmax12	1	8231236	T	A	0.0219561	INTERGENIC	clim-tmax12	AT1G23201	terminator	8230478	8231978	0	0	0	0	0	0	0	0	0	0	0	0	0	0	0	0	0	0	0	0	0	0	0	0	0	0	0	0	0	0	0	0	0	0	0	0	0	0
1.8233836.C_T.clim-tmax12	1	8233836	C	T	0.0219561	INTERGENIC	clim-tmax12	AT1G23205	terminator	8232952	8234452	0	0	0	0	0	0	0	0	0	0	0	0	0	0	0	0	0	0	0	0	0	0	0	0	0	0	0	0	0	0	0	0	0	0	0	0	0	0
1.8268630.A_G.clim-tmax12	1	8268630	A	G	0.0219561	UTR_3_PRIME	clim-tmax12	AT1G23310	terminator	8267384	8268884	0	0	0	0	0	0	0	0	0	0	0	0	0	0	0	0	0	0	0	0	0	0	0	0	0	0	0	0	0	0	0	0	0	0	0	0	0	0
1.8272868.A_T.clim-tmax12	1	8272868	A	T	0.0219561	INTERGENIC	clim-tmax12	AT1G23310	promoter	8271521	8273021	0	0	0	0	0	0	0	0	0	0	0	0	0	0	0	0	0	0	0	0	0	0	0	0	0	0	0	0	0	0	0	0	0	0	0	0	0	0
1.8273172.C_T.clim-tmax12	1	8273172	C	T	0.0219561	INTERGENIC	clim-tmax12	AT1G23320	terminator	8272422	8273922	0	0	0	0	0	0	0	0	0	0	0	0	0	0	0	0	0	0	0	0	0	0	0	0	0	0	0	0	0	0	0	0	0	0	0	0	0	0
1.8282674.A_G.clim-tmax12	1	8282674	A	G	0.0219561	INTERGENIC	clim-tmax12	AT1G23330	promoter	8281921	8283421	0	0	0	0	0	0	0	0	0	0	0	0	0	0	0	0	0	0	0	0	0	0	0	0	0	0	0	0	0	0	0	0	0	0	0	0	0	0
1.8369174.C_T.clim-tmax12	1	8369174	C	T	0.0259481	INTRON	clim-tmax12	AT1G23645	terminator	8368096	8369596	0	0	0	0	0	0	0	0	0	0	0	0	0	0	0	0	0	0	0	0	0	0	0	0	0	0	0	0	0	0	0	0	0	0	0	0	0	0
1.8369157.A_G.clim-tmax12	1	8369157	A	G	0.0259481	INTRON	clim-tmax12	AT1G23645	terminator	8368096	8369596	0	0	0	0	0	0	0	0	0	0	0	0	0	0	0	0	0	0	0	0	0	0	0	0	0	0	0	0	0	0	0	0	0	0	0	0	0	0
1.16413600.C_T.Co59	1	16413600	C	T	0.0645161	INTERGENIC	Co59	AT1G43580	promoter	16412236	16413736	0	0	0	0	0	0	0	0	0	0	0	0	0	0	0	0	0	0	0	0	0	0	0	0	0	0	0	0	0	0	0	0	0	0	0	0	0	0
1.16412820.A_C.Co59	1	16412820	A	C	0.0645161	INTERGENIC	Co59	AT1G43580	promoter	16412236	16413736	0	0	0	0	0	0	0	0	0	0	0	0	0	0	0	0	0	0	0	0	0	0	0	0	0	0	0	0	0	0	0	0	0	0	0	0	0	0
1.16414494.C_T.Co59	1	16414494	C	T	0.0645161	NON_SYNONYMOUS_CODING	Co59	AT1G43600	promoter	16414356	16415856	0	0	0	0	0	0	0	0	0	0	0	0	0	0	0	0	0	0	0	0	0	0	0	0	0	0	0	0	0	0	0	0	0	0	0	0	0	0
1.16413701.T_G.Co59	1	16413701	T	G	0.0645161	INTERGENIC	Co59	AT1G43580	promoter	16412236	16413736	0	0	0	0	0	0	0	0	0	0	0	0	0	0	0	0	0	0	0	0	0	0	0	0	0	0	0	0	0	0	0	0	0	0	0	0	0	0
1.16417734.G_T.Co59	1	16417734	G	T	0.0645161	INTERGENIC	Co59	AT1G43605	promoter	16417428	16418928	0	0	0	0	0	-1	0	0	0	0	0	0	0	0	0	0	0	0	0	0	0	0	0	0	0	0	0	0	0	0	0	0	0	0	0	0	0	0
1.16418190.T_A.Co59	1	16418190	T	A	0.0645161	INTERGENIC	Co59	AT1G43605	promoter	16417428	16418928	0	0	0	0	0	0	0	0	0	0	0	0	0	0	0	0	0	0	0	0	0	0	0	0	0	0	0	0	0	0	0	0	0	0	0	0	0	0
1.27840192.C_T.clim-tmax3	1	27840192	C	T	0.068	NON_SYNONYMOUS_CODING	clim-tmax3	AT1G74035	terminator	27839275	27840775	0	0	0	0	0	0	0	0	0	0	0	0	0	0	0	0	0	0	0	0	0	0	0	0	0	0	0	0	0	0	0	0	0	0	0	0	0	0
1.912684.A_T.clim-bio9	1	912684	A	T	0.028	INTERGENIC	clim-bio9	AT1G04203	promoter	912389	913889	0	0	0	0	0	0	0	0	0	0	0	0	0	0	0	0	0	0	0	0	0	0	0	0	0	0	0	0	0	0	0	0	0	0	0	0	0	0
1.1072138.T_C.clim-bio9	1	1072138	T	C	0.022	INTERGENIC	clim-bio9	AT1G04243	terminator	1071573	1073073	0	0	0	0	0	0	0	0	0	0	0	0	0	0	0	0	0	0	-1	0	0	0	0	0	0	0	0	0	0	0	0	0	0	0	0	0	0	0
1.12426752.C_T.clim-tmax12	1	12426752	C	T	0.0159681	INTERGENIC	clim-tmax12	AT1G34120	promoter	12425699	12427199	0	0	0	0	0	0	0	0	0	0	0	0	0	0	0	0	0	0	0	0	0	0	0	0	0	0	0	0	0	0	0	0	0	0	0	0	0	0
1.22733751.G_T.clim-tmin7	1	22733751	G	T	0.0179641	NON_SYNONYMOUS_CODING	clim-tmin7	AT1G61610	promoter	22732358	22733858	0	0	0	0	0	0	0	0	0	0	-1	0	0	0	0	0	0	0	0	0	0	0	0	0	0	0	0	0	0	0	0	0	0	0	0	0	0	0
1.8541652.T_A.clim-tmax6	1	8541652	T	A	0.0199601	UTR_3_PRIME	clim-tmax6	AT1G24145	terminator	8541553	8543053	0	0	0	0	0	0	0	0	0	0	0	0	0	0	0	0	0	0	0	0	0	0	0	0	0	0	0	0	0	0	0	0	0	0	0	0	0	0
1.8545588.T_C.clim-tmax6	1	8545588	T	C	0.0199601	INTERGENIC	clim-tmax6	AT1G24148	terminator	8545090	8546590	0	0	0	0	0	0	0	0	0	0	0	0	0	0	0	0	0	0	0	0	0	0	0	0	0	0	0	0	0	0	0	0	0	0	0	0	0	0
1.17387686.C_A.clim-aet11	1	17387686	C	A	0.011976	INTERGENIC	clim-aet11	AT1G07357	terminator	17386508	17388008	0	0	0	0	0	0	0	0	0	0	0	0	0	0	0	0	0	0	0	0	0	0	0	0	0	0	0	0	0	0	0	0	0	0	0	0	0	0
1.3637842.T_C.clim-pet10	1	3637842	T	C	0.235529	INTERGENIC	clim-pet10	AT1G10900	promoter	3636750	3638250	0	0	0	0	0	0	0	0	0	0	0	0	0	0	0	0	0	0	0	0	0	0	0	0	0	0	0	0	0	0	0	0	0	0	0	0	0	0
1.27663775.A_T.clim-tmax10	1	27663775	A	T	0.011976	INTERGENIC	clim-tmax10	AT1G73590	terminator	27662753	27664253	0	0	0	0	0	0	0	0	0	0	0	0	0	0	0	0	0	0	0	0	0	0	0	0	0	0	0	0	0	0	0	0	0	0	0	0	0	0
1.27663269.T_G.clim-tmax10	1	27663269	T	G	0.011976	INTERGENIC	clim-tmax10	AT1G73590	terminator	27662753	27664253	0	0	0	0	0	0	0	0	0	0	0	0	0	0	0	0	0	0	0	0	0	0	0	0	0	0	0	0	0	0	0	0	0	0	0	0	0	0
1.16742504.T_G.clim-bio3	1	16742504	T	G	0.369261	INTERGENIC	clim-bio3	AT1G44050	terminator	16741152	16742652	0	0	0	0	0	0	0	0	0	0	0	0	0	0	0	0	0	0	0	0	0	0	0	0	0	0	0	0	0	0	0	0	0	0	0	0	0	0
1.27708256.G_A.clim-bio9	1	27708256	G	A	0.018	INTERGENIC	clim-bio9	AT1G73680	promoter	27707157	27708657	0	0	0	0	0	0	0	0	0	0	0	0	0	0	0	0	0	0	0	0	0	0	0	0	0	0	0	0	0	0	0	0	0	0	0	0	0	0
1.27712485.T_G.clim-bio9	1	27712485	T	G	0.018	INTERGENIC	clim-bio9	AT1G73687	terminator	27712232	27713732	0	0	0	0	0	0	0	0	0	0	0	0	0	0	0	0	0	0	0	0	0	0	0	0	0	0	0	0	0	0	0	0	0	0	0	0	0	0
1.27712588.T_A.clim-bio9	1	27712588	T	A	0.018	INTERGENIC	clim-bio9	AT1G73687	terminator	27712232	27713732	0	0	0	0	0	0	0	0	0	0	0	0	0	0	0	0	0	0	0	0	0	0	0	0	0	0	0	0	0	0	0	0	0	0	0	0	0	0
1.6237886.G_A.clim-gs8	1	6237886	G	A	0.0159681	INTRON	clim-gs8	AT1G18140	terminator	6237838	6239338	-1	0	0	0	0	0	0	0	0	0	0	0	0	0	0	0	0	0	0	0	0	0	0	0	0	0	0	0	0	0	0	0	0	0	0	0	0	0
1.8756436.T_G.clim-tmin7	1	8756436	T	G	0.0299401	INTERGENIC	clim-tmin7	AT1G24706	terminator	8755104	8756604	0	0	0	0	0	0	0	0	0	0	0	0	0	0	0	0	0	0	0	0	0	0	0	0	0	0	0	0	0	0	0	0	0	0	0	0	0	0
1.24933540.A_G.clim-bio9	1	24933540	A	G	0.038	INTERGENIC	clim-bio9	AT1G66840	terminator	24932776	24934276	0	0	0	0	0	0	0	0	0	0	0	0	0	0	0	0	0	0	0	0	0	0	0	0	0	0	0	0	0	0	0	0	0	0	0	0	0	0
1.24933674.G_T.clim-bio9	1	24933674	G	T	0.038	INTERGENIC	clim-bio9	AT1G66840	terminator	24932776	24934276	0	0	0	0	0	0	0	0	0	-1	0	0	0	0	0	0	0	0	0	0	0	0	0	0	0	0	0	0	0	0	0	0	0	0	0	0	0	0
1.24933957.T_A.clim-bio9	1	24933957	T	A	0.038	UTR_3_PRIME	clim-bio9	AT1G66840	terminator	24932776	24934276	0	0	0	0	0	0	0	0	0	0	0	0	0	0	0	0	0	0	0	0	0	1	0	0	0	0	0	0	0	0	0	0	0	0	0	0	0	0
1.24934013.A_G.clim-bio9	1	24934013	A	G	0.038	SYNONYMOUS_CODING	clim-bio9	AT1G66840	terminator	24932776	24934276	0	0	0	0	0	0	0	0	0	0	0	0	0	0	0	0	0	0	0	0	0	0	0	0	0	0	0	0	0	0	0	0	0	0	0	0	0	0
1.24934262.T_A.clim-bio9	1	24934262	T	A	0.038	SYNONYMOUS_CODING	clim-bio9	AT1G66840	terminator	24932776	24934276	0	0	0	0	0	0	0	0	0	0	0	0	0	0	0	0	0	0	0	0	0	0	0	0	0	0	0	0	0	0	0	0	0	0	0	0	0	0
1.24933456.C_A.clim-bio9	1	24933456	C	A	0.038	INTERGENIC	clim-bio9	AT1G66840	terminator	24932776	24934276	0	0	0	0	0	0	0	0	0	0	0	0	0	0	0	0	0	0	0	0	0	0	0	0	0	0	0	0	0	0	0	0	0	0	0	0	0	0
1.24933479.T_G.clim-bio9	1	24933479	T	G	0.038	INTERGENIC	clim-bio9	AT1G66840	terminator	24932776	24934276	0	0	0	0	0	0	0	0	0	0	0	0	0	0	0	0	0	0	0	0	0	0	0	0	0	0	0	0	0	0	0	0	0	0	0	0	0	0
1.24933503.T_G.clim-bio9	1	24933503	T	G	0.038	INTERGENIC	clim-bio9	AT1G66840	terminator	24932776	24934276	0	0	0	0	0	0	0	0	0	0	0	0	0	0	0	0	0	0	0	0	0	0	0	0	-1	0	0	0	0	0	0	0	0	0	0	0	0	0
1.24933538.T_C.clim-bio9	1	24933538	T	C	0.038	INTERGENIC	clim-bio9	AT1G66840	terminator	24932776	24934276	0	0	0	0	0	0	0	0	0	0	0	0	0	0	0	0	0	0	0	0	0	0	0	0	0	0	0	0	0	0	0	0	0	0	0	0	0	0
1.24933733.T_C.clim-bio9	1	24933733	T	C	0.038	INTERGENIC	clim-bio9	AT1G66840	terminator	24932776	24934276	0	0	0	0	0	0	0	0	0	0	0	0	0	0	0	0	0	0	0	0	0	0	0	0	0	0	0	0	0	0	0	0	0	0	0	0	0	0
1.24933783.T_A.clim-bio9	1	24933783	T	A	0.038	INTERGENIC	clim-bio9	AT1G66840	terminator	24932776	24934276	0	0	0	0	0	0	0	0	0	0	0	0	0	0	0	0	0	0	0	0	0	1	0	0	0	0	0	0	0	0	0	0	0	0	0	0	0	0
1.24933964.A_T.clim-bio9	1	24933964	A	T	0.038	UTR_3_PRIME	clim-bio9	AT1G66840	terminator	24932776	24934276	0	0	0	0	0	0	0	0	0	0	0	0	0	0	0	0	0	0	0	0	0	0	0	0	0	0	0	0	0	0	0	0	0	0	0	0	0	0
1.24934212.G_A.clim-bio9	1	24934212	G	A	0.038	NON_SYNONYMOUS_CODING	clim-bio9	AT1G66840	terminator	24932776	24934276	0	0	0	0	0	0	0	0	0	0	0	0	0	0	0	0	0	0	0	0	0	0	0	0	0	0	0	0	0	0	0	0	0	0	0	0	0	0
1.24934217.T_A.clim-bio9	1	24934217	T	A	0.038	SYNONYMOUS_CODING	clim-bio9	AT1G66840	terminator	24932776	24934276	0	0	0	0	0	0	0	0	0	0	0	0	0	0	0	0	0	0	0	0	0	0	0	0	0	0	0	0	0	0	0	0	0	0	0	0	0	0
1.24933181.A_T.clim-bio9	1	24933181	A	T	0.038	INTERGENIC	clim-bio9	AT1G66840	terminator	24932776	24934276	0	0	0	0	0	0	0	0	0	0	0	0	0	0	0	0	0	0	0	0	0	0	0	0	0	0	0	0	0	0	0	0	0	0	0	0	0	0
1.24933330.G_T.clim-bio9	1	24933330	G	T	0.038	INTERGENIC	clim-bio9	AT1G66840	terminator	24932776	24934276	0	0	0	0	0	0	0	0	0	0	0	0	0	0	0	0	0	0	0	0	0	0	0	0	0	0	0	0	0	0	0	0	0	0	0	0	0	0
1.24933379.A_G.clim-bio9	1	24933379	A	G	0.038	INTERGENIC	clim-bio9	AT1G66840	terminator	24932776	24934276	0	0	0	0	0	0	0	0	0	0	0	0	0	0	0	0	0	0	0	0	0	0	0	0	0	0	0	0	0	0	0	0	0	0	0	0	0	0
1.24933410.T_G.clim-bio9	1	24933410	T	G	0.038	INTERGENIC	clim-bio9	AT1G66840	terminator	24932776	24934276	0	0	0	0	0	0	0	0	0	0	0	0	0	0	0	0	0	0	0	0	0	0	0	0	0	0	0	0	0	0	0	0	0	0	0	0	0	0
1.24933793.A_C.clim-bio9	1	24933793	A	C	0.038	INTERGENIC	clim-bio9	AT1G66840	terminator	24932776	24934276	0	0	0	0	0	0	0	0	0	0	0	0	0	0	0	0	0	0	0	0	0	0	0	0	0	0	0	0	0	0	0	0	0	0	0	0	0	0
1.24933156.T_A.clim-bio9	1	24933156	T	A	0.038	INTERGENIC	clim-bio9	AT1G66840	terminator	24932776	24934276	0	0	0	0	0	0	0	0	0	0	0	0	0	0	0	0	0	0	0	0	0	0	0	0	0	0	0	0	0	0	0	0	0	0	0	0	0	0
1.24933482.A_G.clim-bio9	1	24933482	A	G	0.038	INTERGENIC	clim-bio9	AT1G66840	terminator	24932776	24934276	0	0	0	0	0	0	0	0	0	0	0	0	0	0	0	0	0	0	0	0	0	0	0	0	0	0	0	0	0	0	0	0	0	0	0	0	0	0
1.24933541.G_T.clim-bio9	1	24933541	G	T	0.038	INTERGENIC	clim-bio9	AT1G66840	terminator	24932776	24934276	0	0	0	0	0	0	0	0	0	0	0	0	0	0	0	0	0	0	0	0	0	0	0	0	0	0	0	0	0	0	0	0	0	0	0	0	0	0
1.24933543.T_C.clim-bio9	1	24933543	T	C	0.038	INTERGENIC	clim-bio9	AT1G66840	terminator	24932776	24934276	0	0	0	0	0	0	0	0	0	0	0	0	0	0	0	0	0	0	0	0	0	0	0	0	0	0	0	0	0	0	0	0	0	0	0	0	0	0
1.24933666.T_A.clim-bio9	1	24933666	T	A	0.038	INTERGENIC	clim-bio9	AT1G66840	terminator	24932776	24934276	0	0	0	0	0	0	0	0	0	0	0	0	0	0	0	0	0	0	0	0	0	0	0	0	0	0	0	0	0	0	0	0	0	0	0	0	0	0
1.24933854.C_A.clim-bio9	1	24933854	C	A	0.038	INTERGENIC	clim-bio9	AT1G66840	terminator	24932776	24934276	0	0	0	0	0	0	0	0	0	0	0	0	0	0	0	0	0	0	0	0	0	1	0	0	0	0	0	0	0	0	0	0	0	0	0	0	0	0
1.24933868.C_T.clim-bio9	1	24933868	C	T	0.038	UTR_3_PRIME	clim-bio9	AT1G66840	terminator	24932776	24934276	0	0	0	0	0	0	0	0	0	0	0	0	0	0	0	0	0	0	0	0	0	0	0	0	-1	0	0	0	0	0	0	0	0	0	0	0	0	0
1.24933946.C_A.clim-bio9	1	24933946	C	A	0.038	UTR_3_PRIME	clim-bio9	AT1G66840	terminator	24932776	24934276	0	0	0	0	0	0	0	0	0	0	0	0	0	0	0	0	0	0	0	0	0	0	0	0	0	0	0	0	0	0	0	0	0	0	0	0	0	0
1.3875842.G_A.LD	1	3875842	G	A	0.179641	INTRON	LD	AT1G11540	terminator	3874441	3875941	0	0	0	0	0	0	0	0	0	0	0	0	0	0	0	0	0	0	0	0	0	0	0	0	0	0	0	0	0	0	0	0	0	0	0	0	0	0
1.3875840.T_A.LD	1	3875840	T	A	0.179641	INTRON	LD	AT1G11540	terminator	3874441	3875941	0	0	0	0	0	0	0	0	0	0	0	0	0	0	0	0	0	0	0	0	0	0	0	0	0	0	0	0	0	0	0	0	0	0	0	0	0	0
1.3901594.T_A.LD	1	3901594	T	A	0.185629	INTERGENIC	LD	AT1G11600	promoter	3900949	3902449	0	0	0	0	0	0	0	0	0	0	0	0	0	0	0	0	0	0	0	0	0	1	0	0	0	0	0	0	0	0	0	0	0	0	0	0	0	0
1.3895690.A_T.LD	1	3895690	A	T	0.185629	.	LD	AT1G11591	terminator	3895519	3897019	0	0	0	0	0	0	0	0	0	0	0	0	0	0	0	0	0	0	0	0	0	0	0	0	0	0	0	0	0	0	0	0	0	0	0	0	0	0
1.24119268.C_T.clim-aet7	1	24119268	C	T	0.011976	INTERGENIC	clim-aet7	AT1G64920	promoter	24118493	24119993	0	0	0	0	0	0	0	0	0	0	0	0	0	0	0	0	0	0	0	0	0	0	0	0	0	0	0	0	0	0	0	0	0	0	0	0	0	0
1.24119326.A_G.clim-aet7	1	24119326	A	G	0.011976	INTERGENIC	clim-aet7	AT1G64920	promoter	24118493	24119993	0	0	0	0	0	0	0	0	0	0	0	0	0	0	0	0	0	0	0	0	0	0	0	0	0	0	0	0	0	0	0	0	0	0	0	0	0	0
1.24129176.G_A.clim-aet7	1	24129176	G	A	0.011976	UTR_3_PRIME	clim-aet7	AT1G64960	promoter	24128835	24130335	0	0	0	0	0	0	0	0	0	0	0	0	0	0	0	0	0	0	0	0	0	0	0	0	0	0	0	0	0	0	0	0	0	0	0	0	0	0
1.24115292.T_C.clim-aet7	1	24115292	T	C	0.011976	UTR_3_PRIME	clim-aet7	AT1G64900	terminator	24114484	24115984	0	0	0	0	0	0	0	0	0	0	0	0	0	0	0	0	0	0	0	0	0	0	0	0	0	0	0	0	0	0	0	0	0	0	0	0	0	0
1.24134199.T_C.clim-aet7	1	24134199	T	C	0.011976	UTR_3_PRIME	clim-aet7	AT1G64960	terminator	24133704	24135204	0	0	0	0	0	0	0	0	0	0	0	0	0	0	0	0	0	0	0	0	0	0	0	0	0	0	0	0	0	0	0	0	0	0	0	0	0	0
1.24119293.G_A.clim-aet7	1	24119293	G	A	0.011976	INTERGENIC	clim-aet7	AT1G64920	promoter	24118493	24119993	0	0	0	0	0	0	0	0	0	0	0	0	0	0	0	0	0	0	0	0	0	0	0	0	0	0	0	0	0	0	0	0	0	0	0	0	0	0
1.24126512.A_G.clim-aet7	1	24126512	A	G	0.011976	INTERGENIC	clim-aet7	AT1G64940	terminator	24125014	24126514	0	0	0	0	0	0	0	0	0	0	0	0	0	0	0	0	0	0	0	0	0	0	0	0	0	0	0	0	0	0	0	0	0	0	0	0	0	0
1.24133578.C_T.clim-aet7	1	24133578	C	T	0.011976	SYNONYMOUS_CODING	clim-aet7	AT1G64970	terminator	24133084	24134584	0	0	0	0	0	0	0	0	0	0	0	0	0	0	0	0	0	0	0	0	0	0	0	0	0	0	0	0	0	0	0	0	0	0	0	0	0	0
1.24126604.T_G.clim-aet7	1	24126604	T	G	0.011976	INTERGENIC	clim-aet7	AT1G64950	promoter	24126505	24128005	0	0	0	0	0	0	0	0	0	0	0	0	0	0	0	0	0	0	0	0	0	0	0	0	0	0	0	0	0	0	0	0	0	0	0	0	0	0
1.24083062.A_G.clim-aet7	1	24083062	A	G	0.011976	INTRON	clim-aet7	AT1G64790	promoter	24082928	24084428	0	0	0	0	0	0	0	0	0	0	0	-1	0	0	0	0	0	0	0	0	0	0	0	0	0	0	0	0	1	0	0	0	0	0	0	0	0	0
1.24118698.C_G.clim-aet7	1	24118698	C	G	0.011976	NON_SYNONYMOUS_CODING	clim-aet7	AT1G64920	promoter	24118493	24119993	0	0	0	0	0	0	0	0	0	0	0	0	0	0	0	0	0	0	0	0	0	0	0	0	0	0	0	-1	0	0	0	0	0	0	0	0	0	0
1.8714097.T_C.clim-tmax10	1	8714097	T	C	0.0159681	INTERGENIC	clim-tmax10	AT1G24590	terminator	8713364	8714864	0	0	0	0	0	0	0	0	0	0	0	0	0	0	0	0	0	0	0	0	0	0	0	0	0	0	0	0	0	0	0	0	0	0	0	0	0	0
1.8719887.A_G.clim-tmax10	1	8719887	A	G	0.0159681	INTERGENIC	clim-tmax10	AT1G24600	promoter	8719308	8720808	0	0	0	0	0	0	0	0	0	0	0	0	0	0	0	0	0	0	0	0	0	0	0	0	0	0	0	0	0	0	0	0	0	0	0	0	0	0
1.8714370.G_A.clim-tmax10	1	8714370	G	A	0.0159681	INTERGENIC	clim-tmax10	AT1G24590	terminator	8713364	8714864	0	0	0	0	0	0	0	0	0	0	0	0	0	0	0	0	0	0	0	0	0	0	0	0	0	0	0	0	0	0	0	0	0	0	0	0	0	0
1.8722381.A_G.clim-tmax10	1	8722381	A	G	0.0159681	INTRON	clim-tmax10	AT1G24610	promoter	8722325	8723825	0	0	0	0	0	0	0	0	0	0	0	0	0	0	0	0	0	0	0	0	0	0	0	0	0	0	0	0	0	0	0	0	0	0	0	0	0	0
1.8723344.T_A.clim-tmax10	1	8723344	T	A	0.0159681	INTERGENIC	clim-tmax10	AT1G24620	terminator	8722626	8724126	0	0	0	0	0	0	0	0	0	0	0	0	0	0	0	0	0	0	0	0	0	0	0	0	0	0	0	0	0	0	0	0	0	0	0	0	0	0
1.9317178.G_A.clim-bio8	1	9317178	G	A	0.0179641	INTERGENIC	clim-bio8	AT1G26890	promoter	9316588	9318088	0	0	0	0	0	0	0	0	0	0	0	0	0	0	0	0	0	0	0	0	0	0	0	0	0	0	0	0	0	0	0	0	0	0	0	0	0	0
1.7366838.A_T.clim-bio9	1	7366838	A	T	0.016	UTR_5_PRIME	clim-bio9	AT1G21050	promoter	7365589	7367089	0	0	0	0	0	0	0	0	0	-1	0	0	0	0	0	0	0	0	0	0	0	0	0	0	0	0	0	0	0	0	0	0	0	0	0	0	0	0
1.16474306.G_A.clim-bio9	1	16474306	G	A	0.068	INTERGENIC	clim-bio9	AT1G43680	terminator	16472843	16474343	0	0	0	0	0	0	0	0	0	0	0	0	0	0	0	0	0	0	0	0	0	0	0	0	0	0	0	0	0	0	0	0	0	0	0	0	0	0
1.22624786.C_G.clim-tmax5	1	22624786	C	G	0.0159681	INTERGENIC	clim-tmax5	AT1G61330	terminator	22624027	22625527	0	0	0	0	0	0	0	0	0	0	0	0	0	0	0	0	0	0	0	0	0	0	0	0	0	0	0	0	0	0	0	0	0	0	0	0	0	0
1.8664114.G_A.clim-aet7	1	8664114	G	A	0.0179641	INTERGENIC	clim-aet7	AT1G24440	terminator	8663507	8665007	0	0	0	0	0	0	0	0	0	0	0	0	0	0	0	0	0	0	0	0	0	0	0	0	0	0	0	0	0	0	0	0	0	0	0	0	0	0
1.8656179.G_A.clim-aet7	1	8656179	G	A	0.0179641	INTERGENIC	clim-aet7	AT1G24420	promoter	8655020	8656520	0	0	0	0	0	0	0	0	0	0	0	0	0	0	0	0	0	0	0	0	0	0	0	0	0	0	0	0	0	0	0	0	0	0	0	0	0	0
1.20306766.A_G.clim-gs8	1	20306766	A	G	0.0718563	SYNONYMOUS_CODING	clim-gs8	AT1G54400	promoter	20306571	20308071	0	0	0	0	0	0	0	0	0	0	0	0	0	0	0	0	0	0	0	0	0	0	0	0	0	0	0	0	0	0	0	0	0	0	0	0	0	0
1.8540265.C_T.clim-tmax5	1	8540265	C	T	0.0239521	INTERGENIC	clim-tmax5	AT1G24145	promoter	8539837	8541337	0	0	0	0	0	0	0	0	0	0	0	0	0	0	0	0	0	0	0	0	0	0	0	0	0	0	0	0	0	0	0	0	0	0	0	0	0	0
1.27922468.T_C.clim-tmax3	1	27922468	T	C	0.068	INTERGENIC	clim-tmax3	AT1G74250	terminator	27922222	27923722	0	0	0	0	0	0	0	0	0	0	0	0	0	0	0	0	0	0	0	0	0	0	0	0	0	0	0	0	0	0	0	0	0	0	0	0	0	0
1.27939656.G_A.clim-tmax3	1	27939656	G	A	0.068	SYNONYMOUS_CODING	clim-tmax3	AT1G74320	promoter	27939593	27941093	0	0	0	0	0	0	0	0	0	0	0	0	0	0	0	0	0	0	0	0	0	0	0	0	0	0	0	0	0	0	0	0	0	0	0	0	0	0
1.25163880.C_T.clim-bio9	1	25163880	C	T	0.012	SYNONYMOUS_CODING	clim-bio9	AT1G67235	promoter	25162604	25164104	0	0	0	0	0	0	0	0	0	0	1	0	0	0	0	0	0	0	0	0	0	0	0	0	0	0	0	0	0	0	0	0	0	0	0	0	0	0
1.27674132.A_G.clim-tmax11	1	27674132	A	G	0.0678643	INTERGENIC	clim-tmax11	AT1G73603	promoter	27673287	27674787	0	0	0	0	0	0	0	0	0	0	0	0	0	0	0	0	0	0	0	0	0	0	0	0	0	0	0	0	0	0	0	0	0	0	0	0	0	0
1.29422576.T_C.clim-aet11	1	29422576	T	C	0.0159681	INTERGENIC	clim-aet11	AT1G78210	terminator	29421715	29423215	0	0	0	0	0	0	0	0	0	0	0	0	0	0	0	0	0	0	0	0	0	0	0	0	0	0	0	0	0	0	0	0	0	0	0	0	0	0
1.29427139.C_T.clim-aet11	1	29427139	C	T	0.0159681	NON_SYNONYMOUS_CODING	clim-aet11	AT1G78220	promoter	29426681	29428181	0	0	0	0	0	0	0	0	0	0	0	0	0	0	0	0	0	0	0	0	0	0	0	0	0	0	0	0	0	0	0	0	0	0	0	0	0	0
1.8509959.G_T.clim-bio1	1	8509959	G	T	0.032	NON_SYNONYMOUS_CODING	clim-bio1	AT1G24062	terminator	8509400	8510900	0	0	0	0	0	0	0	0	0	0	0	0	0	0	0	0	0	0	0	0	0	0	0	0	0	0	0	0	0	0	0	0	0	0	0	0	0	0
1.8849882.G_A.clim-aet7	1	8849882	G	A	0.0159681	SYNONYMOUS_CODING	clim-aet7	AT1G05943	promoter	8849006	8850506	0	0	0	0	0	0	0	0	0	0	0	0	0	0	0	0	0	0	0	0	0	0	0	0	0	0	0	0	0	0	0	0	0	0	0	0	0	0
1.8711480.T_G.clim-aet7	1	8711480	T	G	0.0159681	UTR_5_PRIME	clim-aet7	AT1G24575	promoter	8711078	8712578	0	0	0	0	0	0	0	0	0	0	0	0	0	0	0	0	0	0	0	0	0	0	0	0	0	0	0	0	0	0	0	0	0	0	0	0	0	0
1.8864223.T_C.clim-aet7	1	8864223	T	C	0.0159681	UTR_5_PRIME	clim-aet7	AT1G25280	promoter	8862767	8864267	0	0	0	0	0	0	0	0	0	0	0	0	0	0	0	0	0	0	0	0	0	0	0	0	0	0	0	0	0	0	0	0	0	0	0	0	0	0
1.8763528.G_C.clim-aet7	1	8763528	G	C	0.0159681	INTERGENIC	clim-aet7	AT1G24764	promoter	8762969	8764469	0	0	0	0	0	0	0	0	0	0	0	0	0	0	0	0	0	0	0	0	0	0	0	0	0	0	0	0	0	0	0	1	0	0	0	0	0	0
1.8860160.A_G.clim-aet7	1	8860160	A	G	0.0159681	INTERGENIC	clim-aet7	AT1G25275	promoter	8859526	8861026	0	-1	0	0	0	0	0	0	0	0	0	0	0	0	0	0	0	0	0	0	0	0	0	0	0	0	0	0	0	0	0	0	0	0	0	0	0	0
1.8877156.G_A.clim-aet7	1	8877156	G	A	0.0159681	INTERGENIC	clim-aet7	AT1G25320	promoter	8876789	8878289	0	0	0	0	0	0	0	0	0	0	0	0	0	0	0	0	0	0	0	0	0	0	0	0	0	0	0	0	0	1	0	0	0	0	0	0	1	0
1.8886561.G_C.clim-aet7	1	8886561	G	C	0.0159681	INTERGENIC	clim-aet7	AT1G25340	terminator	8886277	8887777	0	0	0	0	0	0	0	0	0	0	0	0	0	0	0	0	0	0	0	0	0	0	0	0	0	0	0	0	0	0	0	0	0	0	0	0	0	0
1.8925203.T_A.clim-aet7	1	8925203	T	A	0.0159681	INTERGENIC	clim-aet7	AT1G05963	promoter	8923954	8925454	0	0	0	0	0	0	0	0	0	0	0	0	0	0	0	0	0	0	0	0	0	0	0	0	0	0	0	0	0	0	0	0	0	0	0	0	0	0
1.8673422.G_A.clim-aet7	1	8673422	G	A	0.0159681	INTERGENIC	clim-aet7	AT1G24470	promoter	8672913	8674413	0	0	0	0	0	0	0	0	0	0	0	0	0	0	0	0	0	0	0	0	0	0	0	0	0	0	0	0	0	0	0	0	0	0	0	0	0	0
1.8873712.T_G.clim-aet7	1	8873712	T	G	0.0159681	INTERGENIC	clim-aet7	AT1G25310	terminator	8873123	8874623	0	0	0	0	0	0	0	0	0	0	0	0	0	0	0	0	0	0	0	0	0	0	0	0	0	0	0	0	0	0	0	0	0	0	0	0	0	0
1.8672937.T_A.clim-aet7	1	8672937	T	A	0.0159681	INTERGENIC	clim-aet7	AT1G24470	promoter	8672913	8674413	0	0	0	0	0	0	0	0	0	0	0	0	0	0	0	0	0	0	0	0	0	0	0	0	0	0	0	0	0	0	0	0	0	0	0	0	0	0
1.8933409.G_T.clim-aet7	1	8933409	G	T	0.0159681	INTERGENIC	clim-aet7	AT1G25440	terminator	8932715	8934215	0	0	0	0	0	0	0	0	0	0	0	0	0	0	0	0	0	0	0	0	0	0	0	0	0	0	0	0	0	0	0	0	0	0	0	0	0	0
1.1106795.C_T.clim-bio9	1	1106795	C	T	0.052	INTRON	clim-bio9	AT1G04180	terminator	1105741	1107241	0	0	0	0	0	0	0	0	0	0	0	0	0	0	0	0	0	0	0	0	0	0	0	0	0	0	0	0	0	0	0	0	0	0	0	0	0	0
1.18784951.A_T.clim-bio9	1	18784951	A	T	0.014	SYNONYMOUS_CODING	clim-bio9	AT1G50700	terminator	18784082	18785582	0	0	0	0	0	0	0	0	0	0	0	0	0	0	0	0	0	0	0	0	0	0	0	0	0	0	0	0	0	0	0	0	0	0	0	0	0	0
1.27635468.C_T.clim-tmax10	1	27635468	C	T	0.0199601	INTERGENIC	clim-tmax10	AT1G73490	promoter	27634490	27635990	0	0	0	0	0	0	0	0	0	0	0	0	0	0	0	0	0	0	0	0	0	0	0	0	0	0	0	0	0	0	0	0	0	0	0	0	0	0
1.27635548.C_T.clim-tmax10	1	27635548	C	T	0.0199601	INTERGENIC	clim-tmax10	AT1G73490	promoter	27634490	27635990	0	0	0	0	0	0	0	0	0	0	0	0	0	0	0	0	0	0	0	0	0	0	0	0	0	0	0	0	0	0	0	0	0	0	0	0	0	0
1.27634758.A_G.clim-tmax10	1	27634758	A	G	0.0199601	INTRON	clim-tmax10	AT1G73490	promoter	27634490	27635990	0	0	0	0	0	0	0	0	0	0	0	0	0	0	0	0	0	0	0	0	0	0	0	0	0	0	0	0	0	0	0	0	0	0	0	0	0	0
1.8542140.T_C.clim-tmax6	1	8542140	T	C	0.0179641	INTERGENIC	clim-tmax6	AT1G24145	terminator	8541553	8543053	0	0	0	0	0	0	0	0	0	0	0	0	0	0	0	0	0	0	0	0	0	0	0	0	0	0	0	0	0	0	0	0	0	0	0	0	0	0
1.6759548.A_G.FT16	1	6759548	A	G	0.00685602	INTERGENIC	FT16	AT1G19520	promoter	6758858	6760358	0	0	0	0	0	0	0	0	0	0	0	0	0	0	0	0	0	0	0	0	0	-1	0	0	0	0	0	0	0	0	0	0	0	0	0	0	0	0
1.27763313.C_T.clim-tmax5	1	27763313	C	T	0.0179641	INTERGENIC	clim-tmax5	AT1G73840	terminator	27762616	27764116	0	0	0	0	0	0	0	0	0	0	0	0	0	0	0	0	0	0	0	0	0	0	0	0	0	0	0	0	0	0	0	0	0	0	0	0	0	0
1.10905195.T_A.clim-bio9	1	10905195	T	A	0.012	NON_SYNONYMOUS_CODING	clim-bio9	AT1G30755	terminator	10904730	10906230	0	0	0	0	0	0	0	0	0	0	0	0	0	0	0	0	0	0	0	0	0	0	0	0	0	0	0	0	0	0	0	0	0	0	0	0	-1	0
1.27384893.T_G.clim-tmax3	1	27384893	T	G	0.014	INTERGENIC	clim-tmax3	AT1G72760	terminator	27384129	27385629	0	0	0	0	0	0	0	0	0	0	0	0	0	0	0	0	0	0	0	0	0	0	0	0	0	0	0	0	0	0	0	0	0	0	0	0	0	0
1.27762169.A_T.clim-tmax3	1	27762169	A	T	0.078	INTERGENIC	clim-tmax3	AT1G73830	terminator	27761088	27762588	0	0	0	0	0	0	0	0	0	0	0	0	0	0	0	0	0	0	0	0	0	0	0	0	0	0	0	0	0	0	0	0	0	0	0	0	0	0
1.5042364.A_G.clim-bio9	1	5042364	A	G	0.016	.	clim-bio9	AT1G14685	promoter	5041239	5042739	0	0	0	0	0	0	0	0	0	0	0	0	0	0	0	0	0	0	0	0	0	0	0	0	0	0	0	0	0	0	0	0	0	0	0	0	0	0
1.1531434.T_A.clim-tmax6	1	1531434	T	A	0.0179641	UTR_3_PRIME	clim-tmax6	AT1G05270	terminator	1530640	1532140	0	0	0	0	0	0	0	0	0	0	0	0	0	0	0	0	0	0	0	0	0	0	0	0	0	0	0	0	0	0	0	0	0	0	0	0	0	0
1.1022332.A_G.clim-bio9	1	1022332	A	G	0.032	UTR_3_PRIME	clim-bio9	AT1G03980	promoter	1021608	1023108	0	0	0	0	0	0	0	0	0	0	0	0	0	0	0	0	0	0	0	0	0	0	0	0	0	0	0	0	0	0	0	0	0	0	0	0	0	0
1.8722950.T_A.clim-tmax10	1	8722950	T	A	0.0219561	INTERGENIC	clim-tmax10	AT1G24620	terminator	8722626	8724126	0	0	0	0	0	0	0	0	0	0	0	0	0	0	0	0	0	0	0	0	0	0	0	0	0	0	0	0	0	0	0	0	0	0	0	0	0	0
1.27943604.A_G.clim-tmax3	1	27943604	A	G	0.07	INTRON	clim-tmax3	AT1G74320	terminator	27942704	27944204	0	0	0	0	0	0	0	0	0	0	0	0	0	0	0	0	0	0	0	0	0	0	0	0	0	0	0	0	0	0	0	0	0	0	0	0	0	0
1.27954163.T_A.clim-tmax3	1	27954163	T	A	0.07	INTERGENIC	clim-tmax3	AT1G74360	promoter	27953128	27954628	0	0	0	0	0	0	0	0	0	0	0	0	0	0	0	0	0	0	0	0	0	0	0	0	0	0	0	0	0	0	0	0	0	0	0	0	0	0
1.10596741.A_G.clim-gs8	1	10596741	A	G	0.011976	SYNONYMOUS_CODING	clim-gs8	AT1G30135	promoter	10595351	10596851	0	0	0	0	0	0	0	0	0	0	0	0	0	0	0	0	0	0	1	0	0	0	0	0	0	0	0	0	0	0	0	0	0	0	0	0	0	0
1.10591297.G_A.clim-gs8	1	10591297	G	A	0.011976	INTERGENIC	clim-gs8	AT1G06307	promoter	10590400	10591900	1	0	0	0	0	0	0	0	0	0	0	0	0	0	0	0	0	0	0	0	0	0	0	0	0	0	0	0	0	0	0	0	0	0	0	0	0	0
1.8599696.A_G.clim-aet7	1	8599696	A	G	0.0179641	INTERGENIC	clim-aet7	AT1G24265	promoter	8599390	8600890	0	0	0	0	0	0	0	0	0	0	0	1	0	0	0	0	0	0	0	0	0	0	0	0	0	0	0	0	0	0	0	0	0	0	0	0	0	0
1.8620455.T_A.clim-aet7	1	8620455	T	A	0.0179641	INTERGENIC	clim-aet7	AT1G24300	promoter	8620164	8621664	0	0	0	0	0	0	0	0	0	0	0	0	0	0	0	0	0	0	0	0	0	0	0	0	0	0	0	0	0	1	0	0	0	0	0	0	0	0
1.8610838.T_C.clim-aet7	1	8610838	T	C	0.0179641	NON_SYNONYMOUS_CODING	clim-aet7	AT1G05867	promoter	8610321	8611821	0	0	0	0	0	0	0	0	0	0	0	0	0	0	0	0	0	0	0	0	0	0	0	0	0	0	0	0	0	0	0	0	0	0	0	0	0	0
1.8643195.C_A.clim-aet7	1	8643195	C	A	0.0179641	INTRON	clim-aet7	AT1G24360	terminator	8643003	8644503	0	1	0	0	0	0	0	0	0	0	0	0	0	0	0	0	0	0	0	0	0	0	0	0	0	0	0	0	0	0	0	0	0	0	0	0	0	0
1.8600295.T_C.clim-aet7	1	8600295	T	C	0.0179641	INTERGENIC	clim-aet7	AT1G24265	promoter	8599390	8600890	0	0	0	0	0	0	0	0	0	0	0	0	0	0	0	0	0	0	0	0	0	0	0	0	0	0	0	0	0	0	0	0	0	0	0	0	0	0
1.11861138.G_C.clim-bio9	1	11861138	G	C	0.022	INTERGENIC	clim-bio9	AT1G32763	promoter	11860423	11861923	0	0	0	0	0	0	0	0	0	0	0	0	0	0	0	0	0	0	0	0	0	0	0	0	0	0	0	0	0	0	0	0	0	0	0	0	0	0
1.25056753.T_A.clim-tmax10	1	25056753	T	A	0.0159681	INTERGENIC	clim-tmax10	AT1G67105	promoter	25056478	25057978	0	0	0	0	0	0	0	0	0	0	0	0	0	0	0	0	0	0	0	0	0	0	0	0	0	0	0	0	0	0	0	0	0	0	0	0	0	0
1.25056711.C_T.clim-tmax10	1	25056711	C	T	0.0159681	INTERGENIC	clim-tmax10	AT1G67105	promoter	25056478	25057978	0	0	0	0	0	0	0	0	0	0	0	0	0	0	0	0	0	0	0	0	0	0	0	0	0	0	0	0	0	0	0	0	0	0	0	0	0	0
1.16275127.A_G.clim-bio9	1	16275127	A	G	0.074	UTR_3_PRIME	clim-bio9	AT1G43190	terminator	16274107	16275607	0	0	0	0	0	0	0	0	0	0	0	0	0	0	0	0	0	0	0	0	0	0	0	0	0	0	0	0	0	0	0	0	0	0	0	0	0	0
1.16317377.G_A.clim-bio9	1	16317377	G	A	0.056	INTERGENIC	clim-bio9	AT1G43260	promoter	16317252	16318752	0	0	0	0	0	0	0	0	0	0	0	0	0	0	0	0	0	0	0	0	0	0	0	0	0	0	0	0	0	0	0	0	0	0	0	0	0	0
1.1544004.T_A.ScalingExponent	1	1544004	T	A	0.0261905	INTERGENIC	ScalingExponent	AT1G05300	terminator	1543926	1545426	0	0	0	0	0	0	0	0	0	0	0	0	0	0	0	0	0	0	0	0	0	0	0	0	0	0	0	0	0	0	0	0	0	0	0	0	0	0
1.1514444.G_C.ScalingExponent	1	1514444	G	C	0.0261905	SYNONYMOUS_CODING	ScalingExponent	AT1G04353	terminator	1514062	1515562	0	0	0	0	0	0	0	0	0	0	0	0	0	0	0	0	0	0	0	0	0	0	0	0	0	0	0	-1	0	0	0	0	0	0	0	0	0	0
1.1523561.G_A.ScalingExponent	1	1523561	G	A	0.0261905	INTERGENIC	ScalingExponent	AT1G05240	terminator	1522523	1524023	0	0	0	0	0	0	0	0	0	-1	0	0	0	0	0	0	0	0	0	0	0	0	0	0	0	0	0	0	0	0	0	0	0	0	0	0	0	0
1.1544196.G_A.ScalingExponent	1	1544196	G	A	0.0261905	INTERGENIC	ScalingExponent	AT1G05300	terminator	1543926	1545426	0	0	0	0	0	0	0	0	0	0	0	0	0	0	0	0	0	0	0	0	0	0	0	0	0	0	0	0	0	0	0	0	0	0	0	0	0	0
1.22793146.T_A.clim-tmax6	1	22793146	T	A	0.0139721	INTERGENIC	clim-tmax6	AT1G61730	terminator	22792169	22793669	0	0	0	0	0	0	0	0	0	0	0	0	0	0	0	0	0	0	0	0	0	0	0	0	0	0	0	0	0	0	0	0	0	0	0	0	0	0
1.7412606.T_G.clim-tmax11	1	7412606	T	G	0.0758483	UTR_5_PRIME	clim-tmax11	AT1G21170	promoter	7411829	7413329	0	0	0	0	0	0	0	0	0	0	0	0	0	0	0	0	0	0	0	0	0	0	0	0	0	0	0	-1	0	0	0	0	0	0	0	0	0	0
1.13365950.G_A.clim-bio1	1	13365950	G	A	0.018	INTERGENIC	clim-bio1	AT1G35910	promoter	13364672	13366172	0	0	0	0	0	0	0	0	0	0	0	0	0	0	0	0	0	0	0	0	0	0	0	0	0	0	0	0	0	0	0	0	0	0	0	0	0	0
1.27599870.T_C.clim-tmax10	1	27599870	T	C	0.0299401	INTERGENIC	clim-tmax10	AT1G73400	terminator	27599781	27601281	0	0	0	0	0	0	0	0	0	0	0	0	0	0	0	0	0	0	0	0	0	0	0	0	0	0	0	0	0	0	0	0	0	0	0	0	0	0
1.959854.T_A.clim-bio9	1	959854	T	A	0.04	INTERGENIC	clim-bio9	AT1G03810	terminator	959109	960609	0	0	0	0	0	0	0	0	0	0	0	0	0	0	0	0	0	0	0	0	0	0	0	0	0	0	0	0	0	0	0	0	0	0	0	0	0	0
1.1572670.A_G.clim-bio9	1	1572670	A	G	0.02	INTERGENIC	clim-bio9	AT1G05370	promoter	1571969	1573469	0	0	0	0	0	0	0	0	0	0	0	0	0	0	0	0	0	0	0	0	0	0	0	0	0	0	0	0	0	0	0	0	0	0	0	0	0	0
1.23836104.G_A.clim-bio9	1	23836104	G	A	0.036	INTERGENIC	clim-bio9	AT1G64230	terminator	23835039	23836539	0	0	0	0	0	0	0	0	0	0	0	0	0	0	0	0	0	0	0	0	0	0	0	0	0	0	0	0	0	0	0	0	0	0	0	0	0	0
1.28684108.T_A.clim-prec8	1	28684108	T	A	0.0179641	INTERGENIC	clim-prec8	AT1G76450	promoter	28683550	28685050	0	0	0	0	0	0	0	0	0	0	0	0	0	0	0	0	0	0	0	0	0	0	0	0	0	0	0	0	0	0	0	0	0	0	0	0	0	0
1.28683627.G_A.clim-prec8	1	28683627	G	A	0.0179641	INTRON	clim-prec8	AT1G76450	promoter	28683550	28685050	0	0	0	0	0	0	0	0	0	0	0	0	0	0	0	0	0	0	0	0	0	0	0	0	0	0	0	0	0	0	0	0	0	0	0	0	0	0
1.28678119.A_C.clim-prec8	1	28678119	A	C	0.0179641	INTERGENIC	clim-prec8	AT1G76430	terminator	28677934	28679434	0	0	0	0	0	0	0	0	0	0	0	0	0	0	0	0	0	0	0	0	0	0	0	0	0	0	0	0	0	0	0	0	0	0	0	0	0	0
1.11125058.G_A.clim-bio9	1	11125058	G	A	0.016	INTERGENIC	clim-bio9	AT1G31160	promoter	11123720	11125220	0	0	0	0	0	0	0	0	0	0	0	0	0	0	0	0	0	0	0	0	0	0	0	0	0	0	0	0	-1	0	0	0	0	0	0	0	0	0
1.16236489.A_G.clim-bio9	1	16236489	A	G	0.082	INTERGENIC	clim-bio9	AT1G43140	terminator	16235609	16237109	0	0	0	0	0	0	0	0	0	0	0	0	0	0	0	0	0	0	0	0	0	0	0	0	0	0	0	0	0	0	0	0	0	0	0	0	0	0
1.4799651.A_C.clim-bio9	1	4799651	A	C	0.018	INTRON	clim-bio9	AT1G14010	terminator	4799168	4800668	0	0	0	0	0	0	0	0	0	0	0	0	0	0	0	0	0	0	0	0	0	0	0	0	0	0	0	0	0	0	0	0	0	0	0	0	0	0
1.3637808.G_T.clim-pet10	1	3637808	G	T	0.217565	INTERGENIC	clim-pet10	AT1G10900	promoter	3636750	3638250	0	0	0	0	0	0	0	0	0	0	0	0	0	0	0	0	0	0	0	0	0	0	0	0	0	0	0	0	0	0	0	0	0	0	0	0	0	0
1.7365981.G_A.clim-bio9	1	7365981	G	A	0.022	INTERGENIC	clim-bio9	AT1G21050	promoter	7365589	7367089	0	0	0	0	0	0	0	0	0	0	0	0	0	0	0	0	0	0	0	0	0	0	0	0	0	0	0	0	0	0	0	0	0	0	0	0	0	0
1.10903784.C_A.clim-bio9	1	10903784	C	A	0.012	SYNONYMOUS_CODING	clim-bio9	AT1G30750	terminator	10903774	10905274	0	0	0	0	0	0	0	0	0	0	0	0	0	0	0	0	0	0	0	0	0	0	0	0	0	0	0	0	0	0	0	0	0	0	0	0	0	0
1.1105697.G_T.clim-bio9	1	1105697	G	T	0.044	NON_SYNONYMOUS_CODING	clim-bio9	AT1G04190	terminator	1105353	1106853	0	0	0	0	0	0	0	0	0	0	0	0	0	0	0	0	0	0	0	0	0	0	0	0	0	0	0	0	0	0	0	0	0	0	0	0	0	0
1.1375085.T_G.clim-bio1	1	1375085	T	G	0.022	NON_SYNONYMOUS_CODING	clim-bio1	AT1G04880	terminator	1374823	1376323	0	0	0	0	0	0	0	0	0	0	0	0	0	0	0	0	0	0	0	0	0	0	0	0	0	0	0	0	0	0	0	0	0	0	0	0	0	0
1.27598025.T_C.clim-tmax10	1	27598025	T	C	0.0279441	INTERGENIC	clim-tmax10	AT1G73400	promoter	27597032	27598532	0	0	0	0	0	0	0	0	0	0	0	0	0	0	0	0	0	0	0	0	0	0	0	0	0	0	0	0	0	0	0	0	0	0	0	0	0	0
1.18583335.C_T.clim-tmax6	1	18583335	C	T	0.0159681	INTRON	clim-tmax6	AT1G50170	terminator	18583332	18584832	0	0	0	0	0	0	0	0	0	0	0	0	0	0	0	0	0	0	0	0	0	0	0	0	0	0	0	0	0	0	0	0	0	0	0	0	0	0
1.18641566.A_T.clim-tmax6	1	18641566	A	T	0.0159681	INTERGENIC	clim-tmax6	AT1G07627	terminator	18640823	18642323	0	0	0	0	0	0	0	0	0	0	0	0	0	0	0	0	0	0	0	0	0	0	0	0	0	0	0	0	0	0	0	0	0	0	0	0	0	0
1.18622745.G_A.clim-tmax6	1	18622745	G	A	0.0159681	SYNONYMOUS_CODING	clim-tmax6	AT1G50280	terminator	18622697	18624197	0	0	0	0	0	0	0	0	0	0	0	0	0	0	0	0	0	0	0	0	0	0	0	0	0	0	0	0	0	0	0	0	0	0	0	0	0	0
1.8505941.C_T.Root length (Day 1)	1	8505941	C	T	0.43609	SYNONYMOUS_CODING	Root length (Day 1)	AT1G24030	terminator	8504960	8506460	0	0	0	0	0	0	0	0	0	0	0	0	0	0	0	0	0	0	0	0	0	0	0	0	0	0	0	0	0	0	0	0	0	0	0	0	0	0
1.8505953.C_T.Root length (Day 1)	1	8505953	C	T	0.43609	SYNONYMOUS_CODING	Root length (Day 1)	AT1G24030	terminator	8504960	8506460	0	0	0	0	0	0	0	0	0	0	0	0	0	0	0	0	0	0	0	0	0	0	0	0	0	0	0	0	0	0	0	0	0	0	0	0	0	0
1.8506013.T_C.Root length (Day 1)	1	8506013	T	C	0.43609	SYNONYMOUS_CODING	Root length (Day 1)	AT1G24050	promoter	8505967	8507467	0	0	0	0	0	0	0	0	0	0	0	0	0	0	0	0	0	0	0	0	0	0	0	0	0	0	0	0	0	0	0	0	0	0	0	0	0	0
1.8505648.A_C.Root length (Day 1)	1	8505648	A	C	0.43609	UTR_3_PRIME	Root length (Day 1)	AT1G24030	terminator	8504960	8506460	0	0	0	0	0	0	0	0	0	0	0	0	0	0	0	0	0	0	0	0	0	0	0	0	0	0	0	0	0	0	0	0	0	0	0	0	0	0
1.984480.G_T.clim-bio9	1	984480	G	T	0.024	INTERGENIC	clim-bio9	AT1G03870	promoter	983044	984544	0	0	0	0	0	0	0	0	0	0	0	0	0	0	0	0	0	0	0	0	0	0	0	0	0	0	0	0	0	0	0	0	0	0	0	0	0	0
1.993666.T_G.clim-bio9	1	993666	T	G	0.024	INTRON	clim-bio9	AT1G03905	promoter	992399	993899	0	0	0	0	0	0	0	0	0	0	0	0	0	0	0	0	0	0	0	0	0	0	0	0	0	0	0	0	0	0	0	0	0	0	0	0	0	0
1.983643.A_T.clim-bio9	1	983643	A	T	0.024	INTERGENIC	clim-bio9	AT1G03870	promoter	983044	984544	0	0	0	0	0	0	0	0	0	0	0	0	0	0	0	0	0	0	0	0	0	0	0	0	0	0	0	0	0	0	0	0	0	0	0	0	0	0
1.924935.T_C.clim-bio9	1	924935	T	C	0.048	INTERGENIC	clim-bio9	AT1G03720	terminator	923895	925395	0	0	0	0	0	0	0	0	0	0	0	0	0	0	0	0	0	0	0	0	0	0	0	0	0	0	0	1	0	0	0	0	0	0	0	0	0	0
1.30202661.G_T.clim-tmax5	1	30202661	G	T	0.0159681	INTERGENIC	clim-tmax5	AT1G80340	promoter	30201849	30203349	0	0	0	0	0	0	0	0	0	0	0	0	0	0	0	0	0	0	0	0	0	1	0	0	0	0	0	0	1	0	0	0	0	0	0	0	0	0
1.30301565.T_A.clim-tmax5	1	30301565	T	A	0.0159681	INTRON	clim-tmax5	AT1G80600	promoter	30300158	30301658	0	0	0	0	0	0	0	0	0	0	0	0	0	0	0	0	0	0	0	0	0	0	0	0	0	0	0	0	0	0	0	0	0	0	0	0	0	0
1.30410987.A_G.clim-tmax5	1	30410987	A	G	0.0159681	NON_SYNONYMOUS_CODING	clim-tmax5	AT1G80940	promoter	30409584	30411084	0	0	0	0	0	0	0	0	0	0	0	0	0	0	0	0	0	0	0	0	0	0	0	0	0	0	0	0	0	0	0	0	0	0	0	0	0	0
1.30228618.C_G.clim-tmax5	1	30228618	C	G	0.0159681	NON_SYNONYMOUS_CODING	clim-tmax5	AT1G09963	terminator	30227947	30229447	0	0	0	0	0	0	0	0	0	0	0	0	0	0	0	0	0	0	0	0	0	0	0	0	0	0	0	0	0	0	0	0	0	0	0	0	0	0
1.30314526.T_G.clim-tmax5	1	30314526	T	G	0.0159681	INTERGENIC	clim-tmax5	AT1G80640	terminator	30313950	30315450	0	0	0	0	0	0	0	0	0	0	0	0	0	0	0	0	0	0	0	0	0	0	0	0	0	0	0	0	0	0	0	0	0	0	0	0	0	0
1.30395375.A_C.clim-tmax5	1	30395375	A	C	0.0159681	NON_SYNONYMOUS_CODING	clim-tmax5	AT1G80870	terminator	30393898	30395398	0	0	0	0	0	0	0	0	0	0	0	0	0	0	0	0	0	0	0	0	0	0	0	0	0	0	0	0	0	0	0	0	0	0	0	0	0	0
1.30398671.T_C.clim-tmax5	1	30398671	T	C	0.0159681	INTRON	clim-tmax5	AT1G80890	terminator	30397710	30399210	0	0	0	0	0	0	0	0	0	0	0	0	0	0	0	0	0	0	0	0	0	0	0	0	0	0	0	0	0	0	0	0	0	0	0	0	0	0
1.30338971.G_T.clim-tmax5	1	30338971	G	T	0.0159681	INTERGENIC	clim-tmax5	AT1G80730	terminator	30338321	30339821	0	0	0	0	0	0	0	0	0	0	0	0	0	0	0	0	0	0	0	0	0	0	0	0	0	0	0	0	0	0	0	0	0	0	0	0	0	0
1.30339366.T_A.clim-tmax5	1	30339366	T	A	0.0159681	UTR_3_PRIME	clim-tmax5	AT1G80730	terminator	30338321	30339821	0	0	0	0	0	0	0	0	0	0	0	0	0	0	0	0	0	0	0	0	0	0	0	0	0	0	0	0	0	0	0	0	0	0	0	0	0	0
1.30410837.G_C.clim-tmax5	1	30410837	G	C	0.0159681	UTR_5_PRIME	clim-tmax5	AT1G80940	promoter	30409584	30411084	0	0	0	0	0	0	0	0	0	0	0	0	0	0	0	0	0	0	0	0	0	0	0	0	0	0	0	0	0	0	0	0	0	0	0	0	0	0
1.30414901.G_C.clim-tmax5	1	30414901	G	C	0.0159681	NON_SYNONYMOUS_CODING	clim-tmax5	AT1G80950	promoter	30414764	30416264	0	0	0	0	0	0	0	0	0	0	0	0	0	0	0	0	0	0	0	0	0	0	0	0	0	0	0	0	0	0	0	0	0	0	0	0	0	0
1.30341110.A_G.clim-tmax5	1	30341110	A	G	0.0159681	INTERGENIC	clim-tmax5	AT1G80730	promoter	30339885	30341385	0	0	0	0	0	0	0	0	0	0	0	0	0	0	0	0	0	0	0	0	0	0	0	0	0	0	0	0	0	0	0	0	0	0	0	0	0	0
1.30391081.G_A.clim-tmax5	1	30391081	G	A	0.0159681	INTERGENIC	clim-tmax5	AT1G80865	terminator	30390057	30391557	0	0	0	0	0	0	0	0	0	0	0	0	0	0	0	0	0	0	0	0	0	0	0	0	0	0	0	0	0	0	0	0	0	0	0	0	0	0
1.30211806.T_C.clim-tmax5	1	30211806	T	C	0.0159681	INTERGENIC	clim-tmax5	AT1G80360	promoter	30211092	30212592	0	0	0	0	0	0	0	0	0	0	0	0	0	0	0	0	0	0	0	0	0	0	0	0	0	0	0	0	0	0	0	0	0	0	0	0	0	0
1.30320378.T_G.clim-tmax5	1	30320378	T	G	0.0159681	INTERGENIC	clim-tmax5	AT1G80660	promoter	30319697	30321197	0	0	0	0	0	0	0	0	0	0	0	0	0	0	0	0	0	0	0	0	0	0	0	0	0	-1	0	1	0	0	0	0	0	0	0	0	0	0
1.30339466.T_C.clim-tmax5	1	30339466	T	C	0.0159681	UTR_3_PRIME	clim-tmax5	AT1G80730	terminator	30338321	30339821	0	0	0	0	0	0	0	0	0	0	0	0	0	0	0	0	0	0	0	0	0	0	0	0	1	0	0	0	0	0	0	0	0	0	0	0	0	0
1.30191775.C_T.clim-tmax5	1	30191775	C	T	0.0159681	INTERGENIC	clim-tmax5	AT1G80300	promoter	30190537	30192037	0	0	0	0	0	0	0	0	0	0	0	0	0	0	0	0	0	0	0	0	0	0	0	0	0	0	0	0	0	0	0	0	0	0	0	0	0	0
1.30234778.A_T.clim-tmax5	1	30234778	A	T	0.0159681	INTRON	clim-tmax5	AT1G80410	promoter	30234587	30236087	0	0	0	0	0	0	0	0	0	0	0	0	0	0	0	0	0	0	0	0	0	0	0	0	0	0	0	0	0	0	0	0	0	0	0	0	0	0
1.30213159.G_A.clim-tmax5	1	30213159	G	A	0.0159681	INTERGENIC	clim-tmax5	AT1G80370	promoter	30212704	30214204	0	0	0	0	0	0	0	0	0	0	0	0	0	0	0	0	0	0	0	0	0	0	0	0	0	0	0	0	0	0	0	0	0	0	0	0	0	0
1.30320090.A_G.clim-tmax5	1	30320090	A	G	0.0159681	UTR_5_PRIME	clim-tmax5	AT1G80660	promoter	30319697	30321197	0	0	0	0	0	0	0	0	0	0	0	0	0	0	0	0	0	0	0	0	0	0	0	0	0	0	0	0	0	0	0	0	0	0	0	0	0	0
1.30323018.C_A.clim-tmax5	1	30323018	C	A	0.0159681	INTRON	clim-tmax5	AT1G80680	promoter	30322881	30324381	0	0	0	0	0	0	0	0	0	0	0	1	0	0	0	0	0	0	0	0	0	0	0	0	0	0	0	0	0	0	0	0	0	0	0	0	0	0
1.30320771.A_T.clim-tmax5	1	30320771	A	T	0.0159681	UTR_3_PRIME	clim-tmax5	AT1G80660	promoter	30319697	30321197	0	0	0	0	0	0	0	0	0	0	0	0	0	0	0	0	0	0	0	0	0	0	0	0	0	0	0	-1	0	0	0	0	0	0	0	0	0	0
1.30322891.G_T.clim-tmax5	1	30322891	G	T	0.0159681	INTRON	clim-tmax5	AT1G80680	promoter	30322881	30324381	0	0	0	0	0	0	0	0	0	0	0	0	0	0	0	0	0	0	0	0	0	0	0	0	0	0	0	0	0	0	0	0	0	0	0	0	0	0
1.30322892.A_G.clim-tmax5	1	30322892	A	G	0.0159681	INTRON	clim-tmax5	AT1G80680	promoter	30322881	30324381	0	0	0	0	0	0	0	0	0	0	0	0	0	0	0	0	0	0	0	0	0	0	0	0	0	0	0	0	0	0	0	0	0	0	0	0	0	0
1.30331214.T_C.clim-tmax5	1	30331214	T	C	0.0159681	INTERGENIC	clim-tmax5	AT1G80700	promoter	30330841	30332341	0	0	0	0	0	0	0	0	0	0	0	0	0	0	0	0	0	0	0	0	0	0	0	0	0	0	0	0	0	0	0	0	0	0	0	0	0	0
1.30202692.T_C.clim-tmax5	1	30202692	T	C	0.0159681	INTERGENIC	clim-tmax5	AT1G80340	promoter	30201849	30203349	0	0	0	0	0	0	0	0	0	0	0	0	0	0	0	0	0	0	0	0	0	0	0	0	0	0	0	0	0	0	0	0	0	0	0	0	0	0
1.30222531.C_T.clim-tmax5	1	30222531	C	T	0.0159681	NON_SYNONYMOUS_CODING	clim-tmax5	AT1G80390	promoter	30222269	30223769	0	0	0	0	0	0	0	0	0	0	0	0	0	0	0	0	0	0	0	0	0	0	0	0	0	0	0	0	0	0	0	0	0	0	0	0	0	0
1.30225272.T_A.clim-tmax5	1	30225272	T	A	0.0159681	UTR_5_PRIME	clim-tmax5	AT1G80400	promoter	30224175	30225675	0	0	0	0	0	0	0	0	0	0	0	0	0	0	0	0	0	0	0	0	0	0	0	0	0	0	0	0	0	0	0	0	0	0	0	0	1	0
1.30279942.G_A.clim-tmax5	1	30279942	G	A	0.0159681	SYNONYMOUS_CODING	clim-tmax5	AT1G80530	promoter	30279859	30281359	0	0	0	0	0	0	0	0	0	0	0	0	0	0	0	0	0	0	0	0	0	0	0	0	0	0	0	0	0	0	0	0	0	0	0	0	0	0
1.30314904.A_G.clim-tmax5	1	30314904	A	G	0.0159681	NON_SYNONYMOUS_CODING	clim-tmax5	AT1G80640	terminator	30313950	30315450	0	0	0	0	0	0	0	0	0	0	0	0	0	0	0	0	0	0	0	0	0	0	0	0	0	0	0	0	0	0	0	0	0	0	0	0	0	0
1.30223407.A_G.clim-tmax5	1	30223407	A	G	0.0159681	INTERGENIC	clim-tmax5	AT1G80390	promoter	30222269	30223769	0	0	0	0	0	0	0	0	0	0	0	0	0	0	0	0	0	0	0	0	0	0	0	0	0	0	0	0	0	0	0	0	0	0	0	0	0	0
1.30391333.C_T.clim-tmax5	1	30391333	C	T	0.0159681	INTERGENIC	clim-tmax5	AT1G80865	terminator	30390057	30391557	0	0	0	0	0	0	0	0	0	0	0	0	0	0	0	0	0	0	0	0	0	0	0	0	0	0	0	0	0	0	0	0	0	0	0	0	0	0
1.16183749.A_G.clim-bio9	1	16183749	A	G	0.056	INTERGENIC	clim-bio9	AT1G43040	promoter	16183037	16184537	0	0	0	0	0	0	0	0	0	0	0	0	0	0	0	0	0	0	0	0	0	0	0	0	0	0	0	0	0	0	0	0	0	0	0	0	0	0
1.16183828.G_A.clim-bio9	1	16183828	G	A	0.056	INTERGENIC	clim-bio9	AT1G43040	promoter	16183037	16184537	0	0	0	0	0	0	0	0	0	0	0	0	0	0	0	0	0	0	0	0	0	0	0	0	0	0	0	0	0	0	0	0	0	0	0	0	0	0
1.16157902.G_T.clim-bio9	1	16157902	G	T	0.056	UTR_3_PRIME	clim-bio9	AT1G43020	terminator	16157450	16158950	0	0	0	0	0	0	0	0	0	0	0	0	0	0	0	0	0	0	0	0	0	0	0	0	0	0	0	0	0	0	0	0	0	0	0	0	0	0
1.16158724.A_G.clim-bio9	1	16158724	A	G	0.056	INTERGENIC	clim-bio9	AT1G43020	terminator	16157450	16158950	0	0	0	0	0	0	0	0	0	0	0	0	0	0	0	0	0	0	0	0	0	0	0	0	0	0	0	0	0	0	0	0	0	0	0	0	0	0
1.16158515.C_T.clim-bio9	1	16158515	C	T	0.056	INTERGENIC	clim-bio9	AT1G43020	terminator	16157450	16158950	0	0	0	0	0	0	0	0	0	0	0	0	0	0	0	0	0	0	0	0	0	0	0	0	0	0	0	0	0	0	0	0	0	0	0	0	0	0
1.16227917.A_G.clim-bio9	1	16227917	A	G	0.056	INTERGENIC	clim-bio9	AT1G43130	terminator	16227188	16228688	0	0	0	0	0	0	0	0	0	0	0	0	0	0	0	0	0	0	0	0	0	0	0	0	0	0	0	0	0	0	0	0	0	0	0	0	0	0
1.967690.A_G.clim-bio9	1	967690	A	G	0.042	NON_SYNONYMOUS_CODING	clim-bio9	AT1G03830	promoter	966290	967790	0	0	0	0	0	0	0	0	0	0	0	0	0	0	0	0	0	0	0	0	0	0	0	0	0	-1	0	0	0	0	0	0	0	0	0	0	0	0
1.860397.C_A.clim-bio9	1	860397	C	A	0.034	INTERGENIC	clim-bio9	AT1G03445	promoter	859201	860701	0	0	0	0	0	0	0	0	0	0	0	0	0	0	0	0	0	0	0	0	0	0	0	0	0	0	0	0	0	0	0	0	0	0	0	0	0	0
1.7472437.C_T.clim-bio1	1	7472437	C	T	0.02	INTERGENIC	clim-bio1	AT1G05657	promoter	7472010	7473510	0	0	0	0	0	0	0	0	0	-1	0	0	0	0	0	0	0	0	0	0	0	0	0	0	0	0	0	0	0	0	0	0	0	0	0	0	0	0
1.8501853.A_T.clim-bio1	1	8501853	A	T	0.058	INTRON	clim-bio1	AT1G24020	promoter	8501565	8503065	0	0	0	0	0	0	0	0	0	0	0	0	0	0	0	0	0	0	0	0	0	0	0	0	0	0	0	0	0	0	0	0	0	1	0	0	0	0
1.25016581.G_A.clim-bio9	1	25016581	G	A	0.012	UTR_5_PRIME	clim-bio9	AT1G67030	promoter	25015401	25016901	0	0	0	0	0	0	0	0	0	0	0	0	0	0	0	0	0	0	0	0	0	0	0	0	0	0	0	0	0	0	0	0	0	0	0	0	0	0
1.25015046.G_C.clim-bio9	1	25015046	G	C	0.02	INTERGENIC	clim-bio9	AT1G67025	promoter	25014225	25015725	0	0	0	0	0	0	0	0	0	0	0	0	0	0	0	0	0	0	0	0	0	0	0	0	0	0	0	0	0	0	0	0	0	0	0	0	0	0
1.25019207.G_A.clim-bio9	1	25019207	G	A	0.02	SYNONYMOUS_CODING	clim-bio9	AT1G67035	terminator	25018557	25020057	0	0	0	0	0	0	0	0	0	0	0	0	0	0	0	0	0	0	0	0	1	0	0	0	0	0	0	0	0	0	0	0	0	0	0	0	0	0
1.25008149.T_G.clim-bio9	1	25008149	T	G	0.02	INTERGENIC	clim-bio9	AT1G67000	promoter	25007147	25008647	0	0	0	0	0	0	0	0	0	0	0	0	0	0	0	0	0	0	0	0	0	0	0	0	0	0	0	0	0	0	0	0	0	0	0	0	0	0
1.25023179.G_A.clim-bio9	1	25023179	G	A	0.02	INTERGENIC	clim-bio9	AT1G67040	promoter	25022204	25023704	0	0	0	0	0	0	0	0	0	0	0	0	0	0	0	0	0	0	0	0	0	0	0	0	0	0	0	0	0	0	0	0	0	0	0	0	0	0
1.25017236.G_A.clim-bio9	1	25017236	G	A	0.02	SYNONYMOUS_STOP	clim-bio9	AT1G08877	terminator	25016841	25018341	0	0	0	0	0	0	0	0	0	0	0	0	0	0	0	0	0	0	0	0	0	0	0	0	0	0	0	0	0	0	0	0	0	0	0	0	0	0
1.25016360.T_C.clim-bio9	1	25016360	T	C	0.02	INTERGENIC	clim-bio9	AT1G67030	promoter	25015401	25016901	0	0	0	0	0	0	0	0	0	0	0	0	0	0	0	0	0	0	0	0	0	1	0	0	0	0	0	0	0	0	0	0	0	0	0	0	0	0
1.27757949.G_A.clim-bio9	1	27757949	G	A	0.028	INTERGENIC	clim-bio9	AT1G73820	promoter	27756963	27758463	0	0	0	0	0	0	0	0	0	0	0	0	0	0	0	0	0	0	0	0	0	0	0	0	0	0	0	0	0	0	0	0	0	0	0	0	0	0
1.27757947.G_A.clim-bio9	1	27757947	G	A	0.028	INTERGENIC	clim-bio9	AT1G73820	promoter	27756963	27758463	0	0	0	0	0	0	0	0	0	0	0	0	0	0	0	0	0	0	0	0	0	0	0	0	0	0	0	0	0	0	0	0	0	0	0	0	0	0
1.16235749.C_T.clim-bio9	1	16235749	C	T	0.088	NON_SYNONYMOUS_CODING	clim-bio9	AT1G43140	terminator	16235609	16237109	0	0	0	0	0	0	0	0	0	0	0	0	0	0	0	0	0	0	0	0	0	0	0	0	0	0	0	0	0	0	0	0	0	0	0	0	0	0
1.3132126.T_G.clim-tmax11	1	3132126	T	G	0.0818363	INTERGENIC	clim-tmax11	AT1G09665	promoter	3132007	3133507	0	0	0	0	0	0	0	0	0	0	0	0	0	0	0	0	0	0	0	0	0	0	0	0	0	0	0	0	0	0	0	0	0	0	0	0	0	0
1.13839649.G_A.clim-aet4	1	13839649	G	A	0.011976	INTERGENIC	clim-aet4	AT1G06983	promoter	13838587	13840087	0	0	0	0	0	0	0	0	0	0	0	0	0	0	0	0	0	0	0	0	0	0	0	0	0	0	0	0	0	0	0	0	0	0	0	0	0	0
1.24773751.G_T.clim-bio9	1	24773751	G	T	0.046	INTERGENIC	clim-bio9	AT1G66410	terminator	24773112	24774612	0	0	0	0	0	0	0	0	0	0	0	0	0	0	0	0	0	0	0	0	0	0	0	0	0	0	0	0	0	0	0	0	0	0	0	0	0	0
1.12025428.G_C.clim-aet4	1	12025428	G	C	0.011976	INTERGENIC	clim-aet4	AT1G33140	terminator	12024283	12025783	0	0	0	0	0	0	0	0	0	0	0	0	-1	0	0	0	0	0	0	0	0	0	0	0	0	0	0	0	0	0	0	0	0	0	0	0	0	0
1.12024825.G_C.clim-aet4	1	12024825	G	C	0.011976	INTRAGENIC	clim-aet4	AT1G33140	terminator	12024283	12025783	0	0	0	0	0	0	0	0	0	0	0	0	0	0	0	0	0	0	0	0	0	0	0	0	0	0	0	0	0	0	0	0	0	0	0	0	0	0
1.12034891.A_T.clim-aet4	1	12034891	A	T	0.011976	INTERGENIC	clim-aet4	AT1G06653	promoter	12034046	12035546	0	0	0	0	0	0	0	0	0	0	0	0	0	0	0	0	0	0	0	0	0	0	0	0	0	0	0	0	0	0	0	0	0	0	0	0	0	0
1.12610966.G_A.clim-bio9	1	12610966	G	A	0.012	INTERGENIC	clim-bio9	AT1G34490	terminator	12609995	12611495	0	0	0	0	0	0	0	0	0	0	0	0	0	0	0	0	0	0	0	0	0	0	0	0	0	0	0	0	0	0	0	0	0	0	0	0	0	0
1.5970099.C_T.clim-bio9	1	5970099	C	T	0.054	INTERGENIC	clim-bio9	AT1G17410	promoter	5969495	5970995	0	0	0	0	0	0	0	0	0	0	0	0	0	0	0	0	0	0	0	0	0	0	0	0	0	0	0	0	0	0	0	0	0	0	0	0	0	0
1.16355839.A_G.clim-bio9	1	16355839	A	G	0.076	INTERGENIC	clim-bio9	AT1G43320	promoter	16355761	16357261	0	0	0	0	0	0	0	0	0	0	0	0	0	0	0	0	0	0	0	0	0	0	0	0	0	0	0	0	0	0	0	0	0	0	0	0	0	0
1.16356037.T_C.clim-bio9	1	16356037	T	C	0.076	INTERGENIC	clim-bio9	AT1G43320	promoter	16355761	16357261	0	0	0	0	0	0	0	0	0	0	0	0	0	0	0	0	0	0	0	0	0	0	0	0	0	0	0	0	0	0	0	0	0	0	0	0	0	0
1.1022313.C_T.clim-bio9	1	1022313	C	T	0.088	UTR_3_PRIME	clim-bio9	AT1G03980	promoter	1021608	1023108	0	0	0	0	0	0	0	0	0	0	0	0	0	0	0	0	0	0	0	0	0	0	0	0	0	0	0	0	0	0	0	0	0	0	0	0	0	0
1.16183946.T_A.clim-bio9	1	16183946	T	A	0.062	INTERGENIC	clim-bio9	AT1G43040	promoter	16183037	16184537	0	0	0	0	0	0	0	0	0	0	0	0	0	0	0	0	0	0	0	0	0	0	0	0	0	0	0	0	0	0	0	0	0	0	0	0	0	0
1.20015738.T_C.clim-gs12	1	20015738	T	C	0.0219561	INTERGENIC	clim-gs12	AT1G53625	promoter	20014538	20016038	0	0	0	0	0	0	0	0	0	0	0	0	0	0	0	0	0	0	0	0	0	0	0	0	0	0	0	0	0	0	0	0	0	0	0	0	0	0
1.23807443.G_A.clim-bio9	1	23807443	G	A	0.014	INTERGENIC	clim-bio9	AT1G64140	promoter	23806659	23808159	0	0	0	0	0	0	0	0	0	0	0	0	0	0	0	0	0	0	0	0	0	0	0	0	0	0	0	0	0	0	0	0	0	0	0	0	0	0
1.16279575.G_A.clim-bio9	1	16279575	G	A	0.076	.	clim-bio9	AT1G43190	promoter	16278242	16279742	0	0	0	0	0	0	0	0	0	0	0	0	0	0	0	0	0	0	0	0	0	0	0	0	0	0	0	0	0	0	0	0	0	0	0	0	0	0
1.27712636.G_A.clim-bio9	1	27712636	G	A	0.02	INTERGENIC	clim-bio9	AT1G73687	terminator	27712232	27713732	0	0	0	0	0	0	0	0	0	0	0	0	0	0	0	0	0	0	0	0	0	0	0	0	0	0	0	0	0	0	0	0	0	0	0	0	0	0
1.16462285.G_A.clim-bio9	1	16462285	G	A	0.084	INTERGENIC	clim-bio9	AT1G43666	promoter	16461234	16462734	0	0	0	0	0	0	0	0	0	0	0	0	0	0	0	0	0	0	0	0	0	0	0	0	0	0	0	0	0	0	0	0	0	0	0	0	0	0
1.19283968.C_T.Emoy*	1	19283968	C	T	0.197368	INTERGENIC	Emoy*	AT1G51910	terminator	19283269	19284769	0	0	0	0	0	0	0	0	0	0	0	0	0	0	0	0	0	0	0	0	0	0	0	0	0	1	0	0	0	0	0	0	0	0	0	0	0	0
1.4444762.C_T.clim-bio9	1	4444762	C	T	0.012	INTRON	clim-bio9	AT1G13020	promoter	4443454	4444954	0	0	0	0	0	0	0	0	0	0	0	0	0	0	0	0	0	0	0	0	0	0	1	0	0	0	0	0	0	-1	0	0	0	0	0	0	0	0
1.11681458.A_T.Emwa1	1	11681458	A	T	0.329412	INTERGENIC	Emwa1	AT1G32375	terminator	11680339	11681839	1	0	0	0	0	0	0	0	0	1	0	0	0	0	0	0	0	0	0	0	0	0	0	0	0	0	0	0	0	0	0	0	0	0	0	0	0	0
1.22244990.A_G.Meristem zone length	1	22244990	A	G	0.368159	NON_SYNONYMOUS_CODING	Meristem zone length	AT1G60370	promoter	22243962	22245462	0	0	0	0	0	0	0	0	0	0	0	0	0	0	0	0	0	0	0	0	0	0	0	0	0	0	0	0	0	0	0	0	0	0	0	0	0	0
1.26208036.G_A.clim-gs3	1	26208036	G	A	0.333333	INTERGENIC	clim-gs3	AT1G09097	promoter	26207530	26209030	0	0	0	0	0	0	0	0	0	0	0	0	0	0	0	0	0	0	0	0	0	0	0	0	0	0	0	0	0	0	0	0	0	0	0	0	0	0
1.1060193.A_C.clim-bio9	1	1060193	A	C	0.034	INTRON	clim-bio9	AT1G04090	terminator	1058954	1060454	0	0	0	0	0	0	0	0	0	0	0	0	0	0	0	0	0	0	0	0	0	0	0	0	0	0	0	0	0	0	0	0	0	0	0	0	0	0
1.953947.A_G.clim-bio9	1	953947	A	G	0.062	INTERGENIC	clim-bio9	AT1G03790	promoter	953289	954789	0	0	0	0	0	0	0	0	0	0	0	0	0	0	0	0	0	0	0	0	0	0	0	0	0	0	0	0	0	0	0	0	0	0	0	0	0	0
1.3427872.C_T.clim-aet4	1	3427872	C	T	0.0259481	INTERGENIC	clim-aet4	AT1G10430	terminator	3427477	3428977	0	0	0	0	0	0	0	0	0	0	0	0	0	0	0	0	0	0	0	0	0	0	0	0	0	0	0	0	0	0	0	0	0	0	0	0	0	0
1.1543993.C_G.clim-bio9	1	1543993	C	G	0.104	INTERGENIC	clim-bio9	AT1G05300	terminator	1543926	1545426	0	0	0	0	0	0	0	0	0	0	0	0	0	0	0	0	0	0	0	0	0	0	0	0	0	0	0	0	0	0	0	0	0	0	0	0	0	0
1.25132854.C_A.clim-tmax5	1	25132854	C	A	0.0139721	INTRON	clim-tmax5	AT1G67190	promoter	25131497	25132997	0	0	0	0	0	0	0	0	0	0	0	0	0	0	0	0	0	0	0	0	0	0	0	0	0	0	0	0	0	0	0	0	0	0	0	0	0	0
1.16307944.A_G.clim-bio9	1	16307944	A	G	0.076	INTERGENIC	clim-bio9	AT1G43245	terminator	16307509	16309009	0	0	0	0	0	0	0	0	0	0	0	0	0	0	0	0	0	0	0	0	0	0	0	0	0	0	0	0	0	0	0	0	0	0	0	0	0	0
1.16228378.C_T.clim-bio9	1	16228378	C	T	0.058	UTR_3_PRIME	clim-bio9	AT1G43130	terminator	16227188	16228688	0	0	0	0	0	0	0	0	0	0	0	0	0	0	0	0	0	0	0	0	0	0	0	0	0	0	0	0	0	0	0	0	0	0	0	0	0	0
1.16268911.A_G.clim-bio9	1	16268911	A	G	0.084	INTERGENIC	clim-bio9	AT1G43170	terminator	16268445	16269945	0	0	0	0	0	0	0	0	0	0	0	0	0	0	0	0	0	0	0	0	0	0	0	0	0	0	0	0	0	0	0	0	0	0	0	0	0	0
1.12959171.T_C.clim-bio9	1	12959171	T	C	0.012	UTR_3_PRIME	clim-bio9	AT1G35320	terminator	12957840	12959340	0	0	0	0	0	0	0	0	0	0	0	0	0	0	0	0	0	0	0	0	0	0	0	0	0	0	0	0	0	0	0	0	0	0	0	0	0	0
1.12959114.T_G.clim-bio9	1	12959114	T	G	0.012	UTR_3_PRIME	clim-bio9	AT1G35320	terminator	12957840	12959340	0	0	0	0	0	0	0	0	0	0	0	0	0	0	0	0	0	0	0	0	0	0	0	0	0	0	0	0	0	0	0	0	0	0	0	0	0	0
1.8279846.T_G.clim-bio9	1	8279846	T	G	0.012	UTR_3_PRIME	clim-bio9	AT1G23330	terminator	8278553	8280053	0	0	0	0	0	0	0	0	0	0	0	0	0	0	0	0	0	0	0	0	0	0	0	0	0	0	0	0	0	0	0	0	0	0	0	0	0	0
1.23375636.C_T.clim-bio9	1	23375636	C	T	0.014	INTERGENIC	clim-bio9	AT1G63050	terminator	23374876	23376376	0	0	0	0	0	0	0	0	0	0	0	0	0	0	0	0	0	0	0	0	0	0	0	0	0	0	0	0	0	0	0	0	0	0	0	0	0	0
1.23379917.A_G.clim-bio9	1	23379917	A	G	0.014	INTRON	clim-bio9	AT1G63057	promoter	23378664	23380164	0	0	0	0	0	0	0	0	0	0	0	0	0	0	0	0	0	0	0	0	0	0	0	0	0	0	0	0	0	0	0	0	0	0	0	0	0	0
1.23385426.C_A.clim-bio9	1	23385426	C	A	0.014	NON_SYNONYMOUS_CODING	clim-bio9	AT1G63060	terminator	23384609	23386109	0	0	0	0	0	0	0	0	0	0	0	0	0	0	0	0	0	0	0	0	0	0	0	0	0	0	0	0	0	0	0	0	0	0	0	0	0	0
1.23393313.G_A.clim-bio9	1	23393313	G	A	0.014	INTERGENIC	clim-bio9	AT1G63090	promoter	23392373	23393873	0	0	0	0	0	0	0	0	0	-1	0	0	0	0	0	0	0	0	0	0	0	0	0	0	0	0	0	0	-1	0	0	0	0	0	0	0	0	0
1.23789351.C_T.Li7	1	23789351	C	T	0.107527	UTR_5_PRIME	Li7	AT1G64090	promoter	23788061	23789561	0	0	0	0	0	0	0	0	0	0	0	0	0	0	0	0	0	0	0	0	0	0	0	0	0	0	0	0	0	0	0	0	0	0	0	0	0	0
1.16266500.A_G.clim-bio9	1	16266500	A	G	0.084	INTERGENIC	clim-bio9	AT1G43170	promoter	16265552	16267052	0	0	0	0	0	0	0	0	0	0	0	0	0	0	0	0	0	0	0	0	0	0	0	0	1	0	0	0	0	0	0	0	0	0	0	0	0	0
1.6145922.T_C.Li7	1	6145922	T	C	0.11828	UTR_3_PRIME	Li7	AT1G17850	terminator	6144925	6146425	0	0	0	0	0	0	0	0	0	0	0	0	0	0	0	0	0	0	0	0	0	0	0	0	0	0	0	0	0	0	0	0	0	0	0	0	0	0
1.23264255.C_A.clim-bio9	1	23264255	C	A	0.012	NON_SYNONYMOUS_CODING	clim-bio9	AT1G62830	terminator	23263485	23264985	0	0	0	0	0	0	0	0	0	0	0	0	0	0	0	0	0	0	0	0	0	0	0	0	0	0	0	0	0	0	0	0	0	0	0	0	0	0
1.23366036.C_A.clim-bio9	1	23366036	C	A	0.012	INTERGENIC	clim-bio9	AT1G08587	promoter	23365430	23366930	0	0	0	0	0	0	0	0	0	0	0	0	0	0	0	0	0	0	0	0	0	-1	0	0	0	0	0	0	0	0	0	0	0	0	0	0	0	0
1.23368470.A_T.clim-bio9	1	23368470	A	T	0.012	INTERGENIC	clim-bio9	AT1G63030	promoter	23367916	23369416	0	0	0	0	0	0	0	0	0	0	0	0	0	0	0	0	0	0	0	0	0	0	0	0	0	0	0	0	0	0	0	0	0	0	0	0	0	0
1.23651057.C_T.clim-bio9	1	23651057	C	T	0.012	NON_SYNONYMOUS_CODING	clim-bio9	AT1G63750	promoter	23649839	23651339	0	0	0	0	0	0	0	0	0	0	0	0	0	0	0	0	0	0	0	0	0	0	0	0	0	0	0	0	0	0	0	0	0	0	0	0	0	0
1.23352958.T_G.clim-bio9	1	23352958	T	G	0.012	INTERGENIC	clim-bio9	AT1G63010	promoter	23352331	23353831	0	0	0	0	0	0	0	0	-1	0	0	0	0	0	0	0	0	0	0	0	0	0	0	0	0	0	0	0	0	0	0	0	0	0	0	0	0	0
1.23393356.T_G.clim-bio9	1	23393356	T	G	0.012	INTERGENIC	clim-bio9	AT1G63090	promoter	23392373	23393873	0	0	0	0	0	0	0	0	0	0	0	0	0	0	0	0	0	0	0	0	0	0	0	0	0	0	0	0	0	0	0	0	0	0	0	0	0	0
1.23352350.A_T.clim-bio9	1	23352350	A	T	0.012	UTR_5_PRIME	clim-bio9	AT1G63010	promoter	23352331	23353831	0	0	0	0	0	0	0	0	0	0	0	0	0	0	0	0	0	0	0	0	0	0	0	0	0	0	0	0	0	0	0	0	0	0	0	0	0	0
1.23367397.T_G.clim-bio9	1	23367397	T	G	0.012	INTERGENIC	clim-bio9	AT1G63030	terminator	23366393	23367893	0	0	0	0	0	0	0	0	0	0	0	0	0	0	0	0	0	0	0	0	0	0	0	0	0	0	0	0	0	0	0	0	0	0	0	0	0	0
1.23367732.G_T.clim-bio9	1	23367732	G	T	0.012	SYNONYMOUS_CODING	clim-bio9	AT1G63030	terminator	23366393	23367893	0	0	0	0	0	0	0	0	0	0	0	0	0	0	0	0	0	0	0	0	0	0	0	0	0	0	0	0	0	0	0	0	0	0	0	0	0	0
1.23393258.T_C.clim-bio9	1	23393258	T	C	0.012	INTERGENIC	clim-bio9	AT1G63090	promoter	23392373	23393873	0	0	0	0	0	0	0	0	0	0	0	0	0	0	0	0	0	0	0	0	0	0	0	0	0	0	0	0	0	0	0	0	0	0	0	0	0	0
1.23650714.T_A.clim-bio9	1	23650714	T	A	0.012	INTERGENIC	clim-bio9	AT1G63750	promoter	23649839	23651339	0	0	0	0	0	0	0	0	0	0	0	0	0	0	0	0	0	0	0	0	0	0	0	0	0	0	0	0	-1	0	0	0	0	0	0	0	0	1
1.23657156.G_A.clim-bio9	1	23657156	G	A	0.012	INTRAGENIC	clim-bio9	AT1G63770	terminator	23656505	23658005	0	0	0	0	0	0	0	0	0	0	0	0	0	0	0	0	0	0	0	0	0	0	0	0	0	0	0	0	0	0	0	0	0	0	0	0	0	0
1.23365848.A_C.clim-bio9	1	23365848	A	C	0.012	INTERGENIC	clim-bio9	AT1G08587	promoter	23365430	23366930	0	0	0	0	0	0	0	0	0	0	0	0	0	0	0	0	0	0	0	0	0	0	0	0	0	0	0	0	0	0	0	0	0	0	0	0	0	0
1.23509008.C_T.clim-bio9	1	23509008	C	T	0.012	SYNONYMOUS_CODING	clim-bio9	AT1G63400	terminator	23508984	23510484	0	0	0	0	0	0	0	0	0	0	0	0	0	0	0	0	0	0	0	0	0	0	0	0	0	0	0	0	0	0	0	0	0	0	0	0	0	0
1.23603141.G_A.clim-bio9	1	23603141	G	A	0.012	INTERGENIC	clim-bio9	AT1G63650	terminator	23602664	23604164	0	0	0	0	0	0	0	0	0	0	0	0	0	0	0	0	0	0	0	0	0	0	0	0	0	0	0	0	0	0	0	0	0	0	0	0	0	0
1.23630424.C_G.clim-bio9	1	23630424	C	G	0.012	INTERGENIC	clim-bio9	AT1G63700	promoter	23629573	23631073	0	0	0	0	0	0	0	0	0	0	0	0	0	0	0	0	0	0	0	0	0	0	0	0	0	0	0	0	0	0	0	0	0	0	0	0	0	0
1.23641240.T_A.clim-bio9	1	23641240	T	A	0.012	INTERGENIC	clim-bio9	AT1G08623	terminator	23639839	23641339	0	0	0	0	0	0	0	0	0	0	0	0	0	0	0	0	0	0	0	0	0	0	0	0	0	0	0	0	0	0	0	0	0	0	0	0	0	0
1.23366007.T_G.clim-bio9	1	23366007	T	G	0.012	INTERGENIC	clim-bio9	AT1G08587	promoter	23365430	23366930	0	0	0	0	0	0	0	0	0	0	0	0	0	0	0	0	0	0	0	0	0	0	0	0	0	0	0	0	0	0	0	0	0	0	0	0	0	0
1.23613464.T_A.clim-bio9	1	23613464	T	A	0.012	INTERGENIC	clim-bio9	AT1G63680	promoter	23613339	23614839	0	0	0	0	0	0	0	0	0	0	0	0	0	0	0	0	0	0	0	0	0	1	0	0	0	0	0	0	0	0	0	0	0	0	0	0	0	0
1.23667568.A_T.clim-bio9	1	23667568	A	T	0.012	INTERGENIC	clim-bio9	AT1G63800	terminator	23666591	23668091	0	0	0	0	0	0	0	0	0	-1	0	0	0	0	0	0	0	0	0	0	0	0	0	0	0	0	0	0	0	0	0	0	0	0	0	0	0	0
1.16474708.C_T.clim-bio9	1	16474708	C	T	0.066	INTERGENIC	clim-bio9	AT1G07193	terminator	16473813	16475313	0	0	0	0	0	0	0	0	0	0	0	0	0	0	0	0	0	0	0	0	0	0	0	0	0	0	0	0	0	0	0	0	0	0	0	0	0	0
1.24861760.C_T.clim-bio9	1	24861760	C	T	0.028	NON_SYNONYMOUS_CODING	clim-bio9	AT1G66650	promoter	24861321	24862821	0	0	0	0	0	0	0	0	0	0	0	0	0	0	0	0	0	0	0	0	0	0	0	0	0	0	0	0	0	-1	0	0	0	0	0	0	0	0
1.24866412.C_T.clim-bio9	1	24866412	C	T	0.028	SYNONYMOUS_CODING	clim-bio9	AT1G66680	terminator	24865094	24866594	0	0	-1	0	0	0	0	0	0	0	0	0	0	0	0	0	0	0	0	0	0	0	0	0	0	0	0	0	0	0	0	0	0	0	0	0	0	0
1.24865320.A_G.clim-bio9	1	24865320	A	G	0.028	INTRON	clim-bio9	AT1G66680	terminator	24865094	24866594	0	0	0	0	0	0	0	0	0	0	0	0	0	0	0	0	0	0	0	0	0	0	0	0	0	0	0	0	0	0	0	0	0	0	0	0	0	0
1.24866636.A_G.clim-bio9	1	24866636	A	G	0.028	INTRON	clim-bio9	AT1G66670	promoter	24865348	24866848	0	0	0	0	0	0	0	0	0	0	0	0	0	0	0	0	0	0	0	0	0	0	0	0	0	0	0	0	0	0	0	0	0	0	0	0	0	0
1.16625298.C_A.clim-bio9	1	16625298	C	A	0.038	INTERGENIC	clim-bio9	AT1G43860	promoter	16624004	16625504	0	0	0	0	0	0	0	0	0	0	0	0	0	0	0	0	0	0	0	0	0	0	0	0	0	0	0	0	0	0	0	0	0	0	0	0	0	0
1.23832971.T_A.clim-bio9	1	23832971	T	A	0.014	INTERGENIC	clim-bio9	AT1G64230	promoter	23832484	23833984	0	0	0	0	0	0	0	0	0	0	0	0	0	0	0	0	0	0	0	0	0	0	0	0	0	0	0	0	0	0	0	0	0	0	0	0	0	0
1.17346372.C_T.Anthocyanin 22	1	17346372	C	T	0.124294	INTERGENIC	Anthocyanin 22	AT1G47317	promoter	17346093	17347593	0	0	0	0	0	0	0	0	0	0	0	0	0	0	0	0	0	0	0	0	0	0	0	0	0	0	0	0	0	0	0	0	0	0	0	0	0	0
1.16475066.A_G.clim-bio9	1	16475066	A	G	0.062	INTERGENIC	clim-bio9	AT1G07193	terminator	16473813	16475313	0	0	0	0	0	0	0	0	0	0	0	0	0	0	0	0	0	0	0	0	0	0	0	0	0	0	0	0	0	0	0	0	0	0	0	0	0	0
1.19780535.T_A.Width 22	1	19780535	T	A	0.0971429	INTERGENIC	Width 22	AT1G53080	promoter	19780287	19781787	0	0	0	0	0	0	0	0	0	0	0	0	0	0	0	0	0	0	0	0	0	0	0	0	0	0	0	0	0	0	0	0	0	0	0	0	0	0
1.1339480.T_A.clim-bio9	1	1339480	T	A	0.022	INTERGENIC	clim-bio9	AT1G04778	promoter	1338587	1340087	0	0	0	0	0	0	0	0	0	0	0	0	0	0	0	0	0	0	0	0	0	0	0	0	0	0	0	0	0	0	0	0	0	0	0	0	0	0
1.27939900.A_T.clim-bio9	1	27939900	A	T	0.064	INTRON	clim-bio9	AT1G74320	promoter	27939593	27941093	1	0	0	0	0	0	0	0	0	0	0	0	0	0	0	0	0	0	0	0	0	0	0	0	0	0	0	0	0	0	0	0	0	0	0	0	0	0
1.27842303.T_C.clim-bio9	1	27842303	T	C	0.07	NON_SYNONYMOUS_CODING	clim-bio9	AT1G74030	promoter	27841632	27843132	0	0	0	0	0	0	0	0	0	0	0	0	0	0	0	0	0	0	0	0	0	0	0	0	0	0	0	0	0	0	0	0	0	0	0	0	0	0
1.27841996.T_C.clim-bio9	1	27841996	T	C	0.07	INTERGENIC	clim-bio9	AT1G74030	promoter	27841632	27843132	0	0	0	0	0	0	0	0	0	0	0	0	0	0	0	0	0	0	0	0	0	0	0	0	0	0	0	0	0	0	0	0	0	0	0	0	0	0
1.27854082.T_G.clim-bio9	1	27854082	T	G	0.07	INTERGENIC	clim-bio9	AT1G74070	promoter	27852769	27854269	0	0	0	0	0	0	0	0	0	0	0	1	0	0	0	0	0	0	0	0	0	0	0	0	0	0	0	0	0	0	0	0	0	0	0	0	0	0
1.1045552.C_A.clim-bio9	1	1045552	C	A	0.074	INTERGENIC	clim-bio9	AT1G04050	terminator	1044597	1046097	0	0	0	0	0	0	0	0	0	0	0	0	1	0	0	0	0	0	0	0	0	0	0	0	0	0	0	0	0	0	0	0	0	0	0	0	0	0
1.18834389.C_T.clim-bio9	1	18834389	C	T	0.014	STOP_GAINED	clim-bio9	AT1G50830	terminator	18834270	18835770	0	0	0	0	0	1	0	0	0	0	0	0	0	0	0	0	0	0	0	0	0	0	0	0	0	0	0	0	0	0	0	0	0	0	0	0	0	0
1.4810388.T_C.clim-bio9	1	4810388	T	C	0.05	INTERGENIC	clim-bio9	AT1G14040	promoter	4809114	4810614	0	0	0	0	0	0	0	0	0	0	0	0	0	0	0	0	0	0	0	0	0	0	0	0	0	0	0	0	0	0	0	0	0	0	0	0	0	0
1.1123567.T_A.clim-bio9	1	1123567	T	A	0.03	INTERGENIC	clim-bio9	AT1G04220	promoter	1122286	1123786	0	0	0	0	0	0	0	0	0	0	0	0	0	0	0	0	0	0	0	0	0	1	0	0	0	0	0	0	0	0	0	0	0	0	0	0	0	0
1.187298.C_T.Root length (Day 1)	1	187298	C	T	0.225564	NON_SYNONYMOUS_CODING	Root length (Day 1)	AT1G01510	promoter	186144	187644	0	0	0	0	0	0	0	0	0	0	0	0	0	0	0	0	0	0	0	0	0	0	0	0	0	0	0	0	0	0	0	0	0	0	0	0	0	0
1.191062.A_G.Root length (Day 1)	1	191062	A	G	0.225564	INTRON	Root length (Day 1)	AT1G01510	terminator	189972	191472	0	0	0	0	0	0	0	0	0	0	0	0	0	0	0	0	0	0	0	0	0	0	0	0	0	0	0	0	0	0	0	0	0	0	0	0	0	0
1.201179.G_A.Root length (Day 1)	1	201179	G	A	0.225564	SYNONYMOUS_CODING	Root length (Day 1)	AT1G01560	promoter	201102	202602	0	0	0	0	0	0	0	0	0	0	0	0	0	0	0	0	0	0	0	0	0	0	0	0	0	0	0	0	0	0	0	0	0	0	0	0	0	0
1.198860.G_A.Root length (Day 1)	1	198860	G	A	0.225564	INTERGENIC	Root length (Day 1)	AT1G01550	promoter	198526	200026	0	0	0	0	0	0	0	0	0	0	0	0	0	0	0	0	0	0	0	0	0	0	0	0	0	0	0	0	0	0	0	0	0	0	0	0	0	0
1.187345.C_A.Root length (Day 1)	1	187345	C	A	0.225564	NON_SYNONYMOUS_CODING	Root length (Day 1)	AT1G01510	promoter	186144	187644	0	0	0	0	0	0	0	0	0	0	0	0	0	0	0	0	0	0	0	0	0	0	0	0	0	0	0	0	0	0	0	0	0	0	0	0	0	0
1.199809.A_G.Root length (Day 1)	1	199809	A	G	0.225564	INTRON	Root length (Day 1)	AT1G01550	promoter	198526	200026	0	0	0	0	0	0	0	0	0	0	0	0	0	0	0	0	0	0	0	0	0	0	0	0	0	0	0	0	0	0	0	0	0	0	0	0	0	0
1.190232.C_T.Root length (Day 1)	1	190232	C	T	0.225564	INTERGENIC	Root length (Day 1)	AT1G01510	terminator	189972	191472	0	0	0	0	0	0	0	0	0	0	0	0	0	0	0	0	0	0	0	0	0	0	0	0	0	0	0	0	0	0	0	0	0	0	0	0	0	0
1.198807.A_G.Root length (Day 1)	1	198807	A	G	0.225564	INTERGENIC	Root length (Day 1)	AT1G01550	promoter	198526	200026	0	0	0	0	0	0	0	0	0	0	0	0	0	0	0	0	0	0	0	0	0	0	0	0	0	0	0	0	0	0	0	0	0	0	0	0	0	0
1.9745952.G_T.Germ 10	1	9745952	G	T	0.310734	INTERGENIC	Germ 10	AT1G27960	promoter	9745296	9746796	0	0	0	0	0	0	0	0	0	0	0	0	0	0	0	0	0	0	0	0	0	0	0	0	0	0	0	0	0	0	0	0	0	0	0	0	0	0
1.942914.A_G.clim-bio9	1	942914	A	G	0.044	INTRON	clim-bio9	AT1G03760	promoter	942877	944377	0	0	0	0	0	0	0	0	0	0	0	0	0	0	0	0	0	0	0	0	0	0	0	0	0	0	0	0	0	0	0	0	0	0	0	0	0	0
1.4801442.T_C.clim-bio9	1	4801442	T	C	0.02	SYNONYMOUS_CODING	clim-bio9	AT1G14010	promoter	4801350	4802850	0	0	0	0	0	0	0	0	0	0	0	0	0	0	0	0	0	0	0	0	0	0	1	0	0	0	0	0	0	0	0	0	0	0	0	0	0	0
1.4800680.T_G.clim-bio9	1	4800680	T	G	0.02	NON_SYNONYMOUS_CODING	clim-bio9	AT1G14000	terminator	4799783	4801283	0	0	0	0	0	0	0	0	0	0	0	0	0	0	0	0	0	0	0	0	0	0	0	0	0	0	0	0	0	0	0	0	0	0	0	0	0	0
1.19354729.G_A.MRLpTRS75	1	19354729	G	A	0.0487805	INTERGENIC	MRLpTRS75	AT1G52050	terminator	19353918	19355418	0	0	0	0	0	0	0	0	0	0	0	0	0	0	0	0	0	0	0	0	0	0	0	0	0	0	0	0	0	0	0	0	0	0	0	0	0	0
1.19349412.C_T.MRLpTRS75	1	19349412	C	T	0.0487805	INTERGENIC	MRLpTRS75	AT1G52030	promoter	19348588	19350088	0	0	0	0	0	0	0	0	0	0	0	0	0	0	0	0	0	0	0	0	0	0	0	0	0	0	0	0	0	0	0	0	0	0	0	0	0	1
1.19350016.T_A.MRLpTRS75	1	19350016	T	A	0.0487805	INTERGENIC	MRLpTRS75	AT1G52030	promoter	19348588	19350088	0	0	0	0	0	0	0	0	0	0	0	0	0	0	0	0	0	0	0	0	0	0	0	0	0	0	0	0	0	0	0	0	0	0	0	0	0	0
1.6657057.A_T.Li7	1	6657057	A	T	0.107527	INTERGENIC	Li7	AT1G19260	terminator	6656259	6657759	0	0	0	0	0	0	0	0	0	0	0	0	0	0	0	0	0	0	0	0	0	0	0	0	0	0	0	0	0	0	0	0	0	0	0	0	0	0
1.6660424.T_A.Li7	1	6660424	T	A	0.107527	INTERGENIC	Li7	AT1G19260	promoter	6659069	6660569	0	0	0	0	0	0	0	0	0	0	0	0	0	0	0	0	0	0	0	0	0	0	0	0	0	0	0	0	0	0	0	0	0	0	0	0	0	0
1.6661576.T_A.Li7	1	6661576	T	A	0.107527	INTERGENIC	Li7	AT1G19270	promoter	6661416	6662916	0	0	0	0	0	0	0	0	0	0	0	0	0	0	0	0	0	0	0	0	0	0	0	0	0	0	0	0	0	0	0	0	0	0	0	0	0	0
1.6661922.A_G.Li7	1	6661922	A	G	0.107527	INTERGENIC	Li7	AT1G19270	promoter	6661416	6662916	0	0	0	0	0	0	0	0	0	0	0	0	0	0	0	0	0	0	0	0	0	0	0	0	0	0	0	0	0	0	0	0	0	0	0	0	0	0
1.6657115.A_T.Li7	1	6657115	A	T	0.107527	INTERGENIC	Li7	AT1G19260	terminator	6656259	6657759	0	0	0	0	0	0	0	0	0	0	0	0	0	0	0	0	0	0	0	0	0	0	0	0	0	0	0	0	0	0	0	0	0	0	0	0	0	0
1.6660488.C_G.Li7	1	6660488	C	G	0.107527	INTERGENIC	Li7	AT1G19260	promoter	6659069	6660569	0	0	0	0	0	0	0	0	0	0	0	0	0	0	0	0	0	0	0	0	0	0	0	0	0	0	0	1	0	0	0	0	0	0	0	0	0	0
1.6660542.T_A.Li7	1	6660542	T	A	0.107527	INTERGENIC	Li7	AT1G19260	promoter	6659069	6660569	0	0	0	0	0	0	0	0	0	0	0	0	0	0	0	0	0	0	0	0	0	0	0	0	0	0	0	0	0	0	0	0	0	0	0	0	0	0
1.6661704.T_A.Li7	1	6661704	T	A	0.107527	INTERGENIC	Li7	AT1G19270	promoter	6661416	6662916	0	0	0	0	0	0	0	0	0	0	0	0	0	0	0	0	0	0	0	0	0	0	0	0	0	0	0	0	0	0	0	0	0	0	0	0	0	0
1.6661939.A_G.Li7	1	6661939	A	G	0.107527	INTERGENIC	Li7	AT1G19270	promoter	6661416	6662916	0	0	0	0	0	0	0	0	0	0	0	0	0	0	0	0	0	0	0	0	0	0	0	0	0	0	0	0	0	0	0	0	0	0	0	0	0	0
1.6661956.A_G.Li7	1	6661956	A	G	0.107527	INTERGENIC	Li7	AT1G19270	promoter	6661416	6662916	0	0	0	0	0	0	0	0	0	0	0	0	0	0	0	0	0	0	0	0	0	0	0	0	0	0	0	0	0	0	0	0	0	0	0	0	0	0
1.6668525.G_A.Li7	1	6668525	G	A	0.107527	SYNONYMOUS_CODING	Li7	AT1G05493	terminator	6668407	6669907	0	0	0	0	0	0	0	0	0	0	0	0	0	0	0	0	0	0	0	0	0	0	0	0	0	0	0	0	0	0	0	0	0	0	0	0	0	0
1.6657107.A_T.Li7	1	6657107	A	T	0.107527	INTERGENIC	Li7	AT1G19260	terminator	6656259	6657759	0	0	0	0	0	0	0	0	0	0	0	0	0	0	0	0	0	0	0	0	0	0	0	0	0	0	0	0	0	0	0	0	0	0	0	0	0	0
1.6660411.G_C.Li7	1	6660411	G	C	0.107527	INTERGENIC	Li7	AT1G19260	promoter	6659069	6660569	0	0	0	0	0	0	0	0	0	0	0	0	0	0	0	0	0	0	0	0	0	0	0	0	0	0	0	0	0	0	0	0	0	0	0	0	0	0
1.6661927.A_G.Li7	1	6661927	A	G	0.107527	INTERGENIC	Li7	AT1G19270	promoter	6661416	6662916	0	0	0	0	0	0	0	0	0	0	0	0	0	0	0	0	0	0	0	0	0	0	0	0	0	0	0	0	0	0	0	0	0	0	0	0	0	0
1.6662502.G_T.Li7	1	6662502	G	T	0.107527	.	Li7	AT1G19270	promoter	6661416	6662916	0	0	0	0	0	0	0	0	0	0	0	0	0	0	0	0	0	0	0	0	0	0	0	0	0	0	0	0	0	0	0	0	0	0	0	0	0	0
1.6661550.A_C.Li7	1	6661550	A	C	0.107527	INTERGENIC	Li7	AT1G19270	promoter	6661416	6662916	0	0	0	0	0	0	0	0	0	0	0	0	0	0	0	0	0	0	0	0	0	0	0	0	0	0	0	0	0	0	0	0	0	0	0	0	0	0
1.6662850.T_C.Li7	1	6662850	T	C	0.107527	UTR_5_PRIME	Li7	AT1G19270	promoter	6661416	6662916	0	0	0	0	0	0	0	0	0	0	0	0	0	0	0	0	0	0	0	0	0	0	0	0	0	0	0	0	0	0	0	0	0	0	0	0	0	0
1.4151290.T_C.avrPphB	1	4151290	T	C	0.211111	INTERGENIC	avrPphB	AT1G12230	terminator	4150556	4152056	0	0	0	0	0	0	0	0	0	0	0	0	0	0	0	0	0	0	0	0	0	0	0	0	0	0	0	0	0	0	0	0	0	0	0	0	0	0
1.27191161.C_A.GR21	1	27191161	C	A	0.0559006	INTERGENIC	GR21	AT1G72240	terminator	27190254	27191754	0	0	0	0	0	0	0	0	0	0	0	0	0	0	0	0	0	0	0	0	0	1	0	0	0	0	0	0	0	0	0	0	0	0	0	0	0	0
2.8455140.A_G.clim-gs10	2	8455140	A	G	0.0518962	INTERGENIC	clim-gs10	AT2G19520	promoter	8454755	8456255	0	0	0	0	0	0	0	0	0	0	0	0	0	0	0	0	0	0	0	0	0	0	0	0	0	0	0	0	0	0	0	0	0	0	0	0	0	0
2.8453358.C_T.clim-gs10	2	8453358	C	T	0.0518962	INTRON	clim-gs10	AT2G19510	promoter	8452199	8453699	0	0	0	0	0	0	0	0	0	0	0	0	0	0	0	0	0	0	0	0	0	0	0	0	0	0	0	0	0	0	0	0	0	0	0	0	0	0
2.8454777.A_G.clim-gs10	2	8454777	A	G	0.0518962	INTERGENIC	clim-gs10	AT2G19520	promoter	8454755	8456255	0	0	0	0	0	0	0	0	0	0	0	0	0	0	0	0	0	0	0	0	0	0	0	0	0	0	0	0	0	0	0	0	0	0	0	0	0	0
2.8455227.C_T.clim-gs10	2	8455227	C	T	0.0518962	INTERGENIC	clim-gs10	AT2G19520	promoter	8454755	8456255	0	0	0	0	0	0	0	0	0	0	0	0	0	0	0	0	0	0	0	0	0	0	0	0	0	0	0	0	0	0	0	0	0	0	0	0	0	0
2.8263091.T_A.clim-gs10	2	8263091	T	A	0.0479042	INTRON	clim-gs10	AT2G19080	promoter	8261695	8263195	0	0	0	0	0	0	0	0	0	0	0	0	0	0	0	0	0	0	0	0	0	0	0	0	0	0	0	0	0	0	0	0	0	0	0	0	0	0
2.8277887.A_C.clim-gs10	2	8277887	A	C	0.0479042	INTERGENIC	clim-gs10	AT2G19110	promoter	8277788	8279288	0	0	0	0	0	0	0	0	0	0	0	0	0	0	0	0	0	0	0	0	0	0	0	0	0	0	0	0	0	0	0	0	0	0	0	0	0	0
2.10951980.C_T.clim-gs10	2	10951980	C	T	0.0518962	INTERGENIC	clim-gs10	AT2G25710	promoter	10951546	10953046	0	0	0	0	-1	0	0	0	0	0	0	0	0	0	0	0	0	0	0	0	0	0	0	0	0	0	0	0	0	0	0	0	0	0	0	0	0	0
2.8268994.T_A.clim-gs10	2	8268994	T	A	0.0638723	INTERGENIC	clim-gs10	AT2G19090	promoter	8267916	8269416	0	0	0	0	0	0	0	0	0	0	0	0	0	0	0	0	0	0	0	0	0	0	0	0	0	0	0	0	0	0	0	0	0	0	0	0	0	0
2.8352866.A_G.clim-pet12	2	8352866	A	G	0.0159681	INTRAGENIC	clim-pet12	AT2G19240	promoter	8352062	8353562	0	0	0	0	0	0	0	0	0	0	0	0	0	0	0	0	0	0	0	0	0	0	0	0	0	0	0	0	0	0	0	0	0	0	0	0	0	0
2.8157560.T_A.clim-gs10	2	8157560	T	A	0.0459082	INTERGENIC	clim-gs10	AT2G18840	promoter	8157105	8158605	0	0	0	0	0	0	0	0	0	0	0	0	0	0	0	0	0	0	0	0	0	0	0	0	0	0	0	0	0	0	0	0	0	0	0	0	0	0
2.15657548.A_G.clim-gs10	2	15657548	A	G	0.0479042	INTRON	clim-gs10	AT2G37280	terminator	15656157	15657657	0	0	0	0	0	0	0	0	0	0	0	0	0	0	0	0	0	0	0	0	0	0	0	0	0	0	0	0	0	0	0	0	0	0	0	0	0	0
2.10952095.G_T.clim-gs10	2	10952095	G	T	0.0538922	INTERGENIC	clim-gs10	AT2G25710	promoter	10951546	10953046	0	0	0	0	0	0	0	0	0	0	0	0	0	0	0	0	0	0	0	0	0	0	0	0	0	0	0	0	0	0	0	0	0	0	0	0	0	0
2.9080724.T_A.clim-bio4	2	9080724	T	A	0.0718563	INTERGENIC	clim-bio4	AT2G21190	promoter	9079759	9081259	0	0	0	0	0	0	0	0	0	0	0	0	0	0	0	0	0	0	0	0	0	0	0	0	0	0	0	0	0	0	0	0	0	0	0	0	0	0
2.9080559.A_G.clim-bio4	2	9080559	A	G	0.0718563	INTERGENIC	clim-bio4	AT2G21190	promoter	9079759	9081259	0	0	0	0	0	0	0	0	0	0	0	0	0	0	0	0	0	0	0	0	0	0	0	0	0	0	0	-1	0	0	0	0	0	0	0	0	0	0
2.10973708.G_A.clim-gs10	2	10973708	G	A	0.0499002	INTERGENIC	clim-gs10	AT2G25735	terminator	10973654	10975154	0	0	0	0	0	0	0	0	0	0	0	0	0	0	0	0	0	0	0	0	0	0	0	0	0	0	0	0	0	0	0	0	0	0	0	0	0	0
2.10973801.A_G.clim-gs10	2	10973801	A	G	0.0499002	INTERGENIC	clim-gs10	AT2G25735	terminator	10973654	10975154	0	0	0	0	0	0	0	0	0	0	0	0	0	0	0	0	0	0	1	0	0	0	0	0	0	0	0	0	0	0	0	0	0	0	0	0	0	0
2.6790939.A_T.clim-prec10	2	6790939	A	T	0.011976	INTERGENIC	clim-prec10	AT2G15560	promoter	6789715	6791215	0	0	0	0	0	0	0	0	0	0	0	0	0	0	0	0	0	0	0	0	0	0	0	0	0	0	0	0	0	0	0	0	0	0	0	0	0	0
2.6790599.A_C.clim-prec10	2	6790599	A	C	0.011976	INTERGENIC	clim-prec10	AT2G15560	promoter	6789715	6791215	0	0	0	0	0	0	0	0	0	0	0	0	0	0	0	0	0	0	0	0	0	0	0	0	0	0	0	0	0	0	0	0	0	0	0	0	0	0
2.6790913.T_C.clim-prec10	2	6790913	T	C	0.011976	INTERGENIC	clim-prec10	AT2G15560	promoter	6789715	6791215	0	0	0	0	0	0	0	0	0	0	0	0	0	0	0	0	0	0	0	0	0	0	0	0	0	0	0	0	0	0	0	0	0	0	0	0	0	0
2.8468969.C_A.clim-gs10	2	8468969	C	A	0.0558882	NON_SYNONYMOUS_CODING	clim-gs10	AT2G19560	promoter	8468645	8470145	0	0	0	0	0	0	0	0	0	0	0	0	0	0	0	0	0	0	0	0	0	0	0	0	0	0	0	0	0	0	0	0	0	0	0	0	-1	0
2.18381789.A_G.clim-pet12	2	18381789	A	G	0.0139721	UTR_3_PRIME	clim-pet12	AT2G44525	promoter	18381069	18382569	0	0	0	0	0	0	0	0	0	0	0	0	0	0	0	0	0	0	0	0	0	0	0	0	0	0	0	0	0	0	0	0	0	0	0	0	0	0
2.7458040.C_T.clim-gs5	2	7458040	C	T	0.0239521	INTERGENIC	clim-gs5	AT2G17120	promoter	7457929	7459429	0	0	0	0	0	0	0	0	0	0	0	0	0	0	0	0	0	0	0	0	0	0	0	0	0	0	0	0	-1	0	0	0	0	0	0	0	0	0
2.8486244.C_T.clim-gs10	2	8486244	C	T	0.0538922	NON_SYNONYMOUS_CODING	clim-gs10	AT2G19620	terminator	8484990	8486490	0	0	0	0	0	0	0	0	0	0	0	0	0	0	0	0	0	0	0	0	0	0	0	0	0	0	0	0	0	0	0	0	0	0	0	0	0	0
2.8495505.C_T.clim-gs10	2	8495505	C	T	0.0538922	NON_SYNONYMOUS_CODING	clim-gs10	AT2G19650	promoter	8495392	8496892	0	0	0	0	0	0	0	0	0	0	0	0	0	0	0	0	0	0	0	0	0	0	0	0	0	0	0	0	0	0	0	0	0	0	0	0	0	0
2.8491267.T_A.clim-gs10	2	8491267	T	A	0.0538922	INTERGENIC	clim-gs10	AT2G19630	promoter	8490610	8492110	0	0	0	0	0	0	0	0	0	0	0	0	0	0	0	0	0	0	0	0	0	0	0	0	0	0	0	0	0	0	0	0	0	0	0	0	0	0
2.8496481.T_C.clim-gs10	2	8496481	T	C	0.0538922	INTERGENIC	clim-gs10	AT2G19660	terminator	8495601	8497101	0	0	0	0	0	0	0	0	0	0	0	0	0	0	0	0	0	0	0	0	0	0	0	0	0	0	0	0	0	0	0	0	0	0	0	0	0	0
2.8526983.G_A.clim-gs10	2	8526983	G	A	0.0538922	INTERGENIC	clim-gs10	AT2G19790	promoter	8526174	8527674	0	0	0	0	0	0	0	0	0	0	0	0	0	0	0	0	0	0	0	0	0	0	0	0	0	0	0	0	0	0	0	0	0	0	0	0	0	0
2.8527250.A_T.clim-gs10	2	8527250	A	T	0.0538922	UTR_5_PRIME	clim-gs10	AT2G19790	promoter	8526174	8527674	0	0	0	0	0	0	0	0	0	0	0	0	0	0	0	0	0	0	0	0	0	0	0	0	0	0	0	0	0	0	0	0	0	0	0	0	0	0
2.8491053.C_T.clim-gs10	2	8491053	C	T	0.0538922	NON_SYNONYMOUS_CODING	clim-gs10	AT2G19630	promoter	8490610	8492110	0	0	0	0	0	0	0	0	0	0	0	0	0	0	0	0	0	0	0	0	0	0	0	0	0	0	0	0	0	0	0	0	0	0	0	0	0	0
2.8529308.C_A.clim-gs10	2	8529308	C	A	0.0538922	INTERGENIC	clim-gs10	AT2G19790	terminator	8528185	8529685	0	0	0	0	0	0	0	0	0	0	0	0	0	0	0	0	0	0	0	0	0	0	0	0	0	0	0	0	0	0	0	0	0	0	0	0	0	0
2.8529817.C_G.clim-gs10	2	8529817	C	G	0.0538922	INTERGENIC	clim-gs10	AT2G19796	promoter	8529687	8531187	0	0	0	0	0	0	0	0	0	0	0	0	0	0	0	0	0	0	0	0	0	0	0	0	1	0	0	0	0	0	0	0	0	0	0	0	0	0
2.8540037.T_C.clim-gs10	2	8540037	T	C	0.0538922	INTERGENIC	clim-gs10	AT2G19802	promoter	8538717	8540217	0	0	0	0	0	0	0	0	0	0	0	0	0	0	0	0	0	0	0	0	0	0	0	0	0	0	0	0	0	0	0	0	0	0	0	0	0	0
2.8493840.G_A.clim-gs10	2	8493840	G	A	0.0538922	NON_SYNONYMOUS_CODING	clim-gs10	AT2G19640	terminator	8492420	8493920	0	0	0	0	0	0	0	0	0	0	0	0	0	0	0	0	0	0	0	0	0	0	0	0	0	0	0	0	0	0	0	0	0	0	0	0	0	0
2.8985825.A_G.clim-gs10	2	8985825	A	G	0.0738523	INTERGENIC	clim-gs10	AT2G20880	promoter	8984958	8986458	0	0	0	0	0	0	0	0	0	0	0	0	0	0	0	0	0	0	0	0	0	0	0	0	0	0	0	0	0	0	0	0	0	0	0	0	0	0
2.12642598.C_T.clim-gs10	2	12642598	C	T	0.0778443	INTRON	clim-gs10	AT2G29530	promoter	12641887	12643387	0	0	0	0	0	0	0	0	0	0	0	0	0	0	0	0	0	0	0	0	0	0	0	0	0	0	0	0	0	0	0	0	0	0	0	0	0	0
2.15242322.C_T.clim-gs10	2	15242322	C	T	0.0518962	INTERGENIC	clim-gs10	AT2G36360	terminator	15241903	15243403	0	0	0	0	0	0	0	0	0	0	0	0	0	0	0	0	0	0	1	0	0	0	0	0	0	0	0	0	0	0	0	0	0	0	0	0	0	0
2.15232543.T_C.clim-gs10	2	15232543	T	C	0.0518962	INTRON	clim-gs10	AT2G36330	promoter	15232499	15233999	0	0	0	0	0	0	0	0	0	0	0	0	0	0	0	0	0	0	0	0	0	0	0	0	0	0	0	0	0	0	0	0	0	0	0	0	0	0
2.15233046.T_C.clim-gs10	2	15233046	T	C	0.0518962	NON_SYNONYMOUS_CODING	clim-gs10	AT2G36325	terminator	15232781	15234281	0	0	0	0	0	0	0	0	0	0	0	0	1	0	0	0	0	0	0	0	0	0	0	0	0	0	0	0	0	0	0	0	0	0	0	0	0	0
2.8123082.A_G.clim-gs10	2	8123082	A	G	0.0439122	INTERGENIC	clim-gs10	AT2G18740	promoter	8122194	8123694	1	0	0	0	0	0	0	0	0	0	0	0	0	0	0	0	0	0	0	0	0	0	0	0	0	0	0	0	0	0	0	0	0	0	0	0	0	0
2.8155514.G_C.clim-gs10	2	8155514	G	C	0.0439122	.	clim-gs10	AT2G18830	terminator	8155203	8156703	0	0	0	0	0	0	0	0	0	0	0	0	0	0	0	0	0	0	0	0	0	0	0	0	0	0	0	0	0	0	0	0	0	0	0	0	0	0
2.8924331.A_G.clim-gs10	2	8924331	A	G	0.0578842	INTRON	clim-gs10	AT2G20700	terminator	8923893	8925393	0	0	0	0	0	0	0	0	0	0	0	0	0	0	0	0	0	0	0	0	0	0	0	0	0	0	0	0	0	0	0	0	0	0	0	0	0	0
2.8925289.A_T.clim-gs10	2	8925289	A	T	0.0578842	NON_SYNONYMOUS_CODING	clim-gs10	AT2G20690	terminator	8924474	8925974	0	0	0	0	0	0	0	0	0	0	0	0	0	0	0	0	0	0	0	0	0	0	0	0	0	0	0	0	0	0	0	0	0	0	0	0	0	0
2.8927708.G_A.clim-gs10	2	8927708	G	A	0.0578842	NON_SYNONYMOUS_CODING	clim-gs10	AT2G20710	terminator	8927344	8928844	0	0	0	0	0	1	0	0	0	-1	0	0	-1	0	0	0	0	0	0	0	0	0	0	0	0	0	0	0	0	-1	0	0	0	0	0	0	0	0
2.8937479.T_A.clim-gs10	2	8937479	T	A	0.0578842	UTR_3_PRIME	clim-gs10	AT2G20740	terminator	8937054	8938554	0	0	0	0	0	0	0	0	0	0	0	0	0	0	0	0	0	0	0	0	0	0	0	0	0	0	0	0	0	0	0	0	0	0	0	0	0	0
2.8931090.T_C.clim-gs10	2	8931090	T	C	0.0578842	INTERGENIC	clim-gs10	AT2G20720	promoter	8929620	8931120	0	0	0	0	0	0	0	0	0	0	0	0	0	0	0	0	0	0	0	0	0	0	0	0	0	0	0	0	0	0	0	0	0	0	0	0	0	0
2.8938402.C_T.clim-gs10	2	8938402	C	T	0.0578842	INTERGENIC	clim-gs10	AT2G20740	terminator	8937054	8938554	0	0	0	0	0	0	0	0	0	0	0	0	0	0	0	0	0	0	0	0	0	0	0	0	0	0	0	0	0	0	0	0	0	0	0	0	0	0
2.8924978.A_T.clim-gs10	2	8924978	A	T	0.0578842	UTR_3_PRIME	clim-gs10	AT2G20690	terminator	8924474	8925974	0	0	0	0	0	0	0	0	0	0	0	0	0	0	0	0	0	0	0	0	0	0	0	0	0	0	0	0	0	0	0	0	0	0	0	0	0	0
2.6772151.C_T.clim-prec9	2	6772151	C	T	0.0139721	NON_SYNONYMOUS_CODING	clim-prec9	AT2G15530	promoter	6771713	6773213	0	0	0	0	0	0	0	0	0	0	0	0	0	0	0	0	0	0	0	0	0	0	0	0	0	0	0	0	0	0	0	0	0	0	0	0	0	0
2.10916182.G_A.Mo98	2	10916182	G	A	0.026087	UTR_3_PRIME	Mo98	AT2G25650	terminator	10915716	10917216	0	0	0	0	0	0	0	0	0	0	0	0	0	0	0	0	0	0	0	0	0	0	0	0	0	0	0	0	0	0	0	0	0	0	0	0	0	0
2.10931347.A_T.Mo98	2	10931347	A	T	0.026087	INTERGENIC	Mo98	AT2G25670	promoter	10930590	10932090	0	0	0	0	0	0	0	0	0	0	0	0	0	0	0	0	0	0	0	0	0	0	0	0	0	0	0	0	0	0	0	0	0	0	0	0	0	0
2.10931452.T_A.Mo98	2	10931452	T	A	0.026087	INTERGENIC	Mo98	AT2G25670	promoter	10930590	10932090	0	0	0	0	0	0	0	0	0	0	0	0	0	0	0	0	0	0	0	0	0	0	0	0	0	0	0	0	0	0	0	0	0	0	0	0	0	0
2.10931458.C_T.Mo98	2	10931458	C	T	0.026087	INTERGENIC	Mo98	AT2G25670	promoter	10930590	10932090	0	0	0	0	0	0	0	0	0	0	0	0	0	0	0	0	0	0	0	0	0	0	0	0	-1	0	0	0	0	0	0	0	0	0	0	0	0	0
2.10932739.C_A.Mo98	2	10932739	C	A	0.026087	INTERGENIC	Mo98	AT2G25680	terminator	10932004	10933504	0	0	0	0	0	0	0	0	0	0	0	0	0	0	0	0	0	0	0	0	0	0	0	0	0	0	0	0	0	0	0	0	0	0	0	0	0	0
2.10933209.C_G.Mo98	2	10933209	C	G	0.026087	SYNONYMOUS_CODING	Mo98	AT2G25680	terminator	10932004	10933504	0	0	0	0	0	0	0	0	0	0	0	0	0	0	0	0	0	0	0	0	0	0	0	0	0	0	0	0	0	0	0	0	0	0	0	0	0	0
2.10933253.C_T.Mo98	2	10933253	C	T	0.026087	NON_SYNONYMOUS_CODING	Mo98	AT2G25680	terminator	10932004	10933504	0	0	0	0	0	0	0	0	0	0	0	0	0	0	0	0	0	0	0	0	0	0	0	0	0	0	0	0	0	0	0	0	0	0	0	0	0	0
2.10933314.T_C.Mo98	2	10933314	T	C	0.026087	SYNONYMOUS_CODING	Mo98	AT2G25680	terminator	10932004	10933504	0	0	0	0	0	0	0	0	0	0	0	0	0	0	0	0	0	0	0	0	0	0	0	0	0	0	0	0	0	0	0	0	0	0	0	0	0	0
2.10916042.A_T.Mo98	2	10916042	A	T	0.026087	UTR_3_PRIME	Mo98	AT2G25650	terminator	10915716	10917216	0	0	0	0	0	0	0	0	0	0	0	0	0	0	0	0	0	0	0	0	0	0	0	0	0	0	0	0	0	0	0	0	0	0	0	0	0	0
2.10931182.C_G.Mo98	2	10931182	C	G	0.026087	INTERGENIC	Mo98	AT2G25670	promoter	10930590	10932090	0	0	0	0	0	0	0	0	0	0	0	0	0	0	0	0	0	0	0	0	0	0	0	0	0	0	0	0	0	0	0	0	0	0	0	0	0	0
2.10931293.A_T.Mo98	2	10931293	A	T	0.026087	INTERGENIC	Mo98	AT2G25670	promoter	10930590	10932090	0	0	0	0	0	0	0	0	0	0	0	0	0	0	0	0	0	0	0	0	0	0	0	0	0	0	0	0	0	0	0	0	0	0	0	0	0	0
2.10933180.C_T.Mo98	2	10933180	C	T	0.026087	NON_SYNONYMOUS_CODING	Mo98	AT2G25680	terminator	10932004	10933504	0	0	0	0	0	0	0	0	0	0	0	0	0	0	0	0	0	0	0	0	0	0	0	0	0	0	0	0	0	0	0	0	0	0	0	0	0	0
2.10933260.A_T.Mo98	2	10933260	A	T	0.026087	SYNONYMOUS_CODING	Mo98	AT2G25680	terminator	10932004	10933504	0	0	0	0	0	0	0	0	0	0	0	0	0	0	0	0	0	0	0	0	0	0	0	0	0	0	0	0	0	0	0	0	0	0	0	0	0	0
2.10915712.T_C.Mo98	2	10915712	T	C	0.026087	SYNONYMOUS_CODING	Mo98	AT2G25660	terminator	10914306	10915806	0	0	0	0	0	0	0	0	0	0	0	0	0	0	0	0	0	0	0	0	0	0	0	0	0	0	0	0	0	0	0	0	0	0	0	0	0	0
2.10931194.T_A.Mo98	2	10931194	T	A	0.026087	INTERGENIC	Mo98	AT2G25670	promoter	10930590	10932090	0	0	0	0	0	0	0	0	0	0	0	0	0	0	0	0	0	0	0	0	0	0	0	0	0	0	0	0	0	0	0	0	0	0	0	0	0	0
2.10931363.T_C.Mo98	2	10931363	T	C	0.026087	INTERGENIC	Mo98	AT2G25670	promoter	10930590	10932090	0	0	0	0	0	0	0	0	0	0	0	0	0	0	0	0	0	0	0	0	0	0	0	0	0	0	0	0	0	0	0	0	0	0	0	0	0	0
2.10932613.A_G.Mo98	2	10932613	A	G	0.026087	INTERGENIC	Mo98	AT2G25680	terminator	10932004	10933504	0	0	0	0	0	0	0	0	0	0	0	0	0	0	0	0	0	0	0	0	0	0	0	0	0	0	0	0	0	0	0	0	0	0	0	0	0	0
2.10932742.T_C.Mo98	2	10932742	T	C	0.026087	INTERGENIC	Mo98	AT2G25680	terminator	10932004	10933504	0	0	0	0	0	0	0	0	0	0	0	0	0	0	0	0	0	0	0	0	0	0	0	0	0	0	0	0	0	0	0	0	0	0	0	0	0	0
2.10933199.T_C.Mo98	2	10933199	T	C	0.026087	NON_SYNONYMOUS_CODING	Mo98	AT2G25680	terminator	10932004	10933504	0	0	0	0	0	0	0	0	0	0	0	0	0	0	0	0	0	0	0	0	0	0	0	0	0	0	0	0	0	0	0	0	0	0	0	0	0	0
2.10915940.A_G.Mo98	2	10915940	A	G	0.026087	SYNONYMOUS_CODING	Mo98	AT2G25650	terminator	10915716	10917216	0	0	0	0	0	0	0	0	0	0	0	0	0	0	0	0	0	0	0	0	0	0	0	0	0	0	0	0	0	0	0	0	0	0	0	0	0	0
2.10916018.A_T.Mo98	2	10916018	A	T	0.026087	UTR_3_PRIME	Mo98	AT2G25650	terminator	10915716	10917216	0	0	0	0	0	0	0	0	0	0	0	0	0	0	0	0	0	0	0	0	0	0	0	0	0	0	0	0	0	0	0	0	0	0	0	0	0	0
2.10916144.A_T.Mo98	2	10916144	A	T	0.026087	UTR_3_PRIME	Mo98	AT2G25650	terminator	10915716	10917216	0	0	0	0	0	0	0	0	0	0	0	0	0	0	0	0	0	0	0	0	0	0	0	0	0	0	0	0	0	0	0	0	0	0	0	0	0	0
2.10927785.A_T.Mo98	2	10927785	A	T	0.026087	INTERGENIC	Mo98	AT2G25660	promoter	10927202	10928702	0	0	0	0	0	0	0	0	0	0	0	0	0	0	0	0	0	0	0	0	0	0	0	0	0	0	0	0	0	0	0	0	0	0	0	0	0	0
2.10928227.A_T.Mo98	2	10928227	A	T	0.026087	INTERGENIC	Mo98	AT2G25660	promoter	10927202	10928702	0	0	0	0	0	0	0	0	0	0	0	0	0	0	0	0	0	0	0	0	0	0	0	0	0	0	0	0	0	0	0	0	0	0	0	0	0	0
2.10928537.G_A.Mo98	2	10928537	G	A	0.026087	INTERGENIC	Mo98	AT2G25660	promoter	10927202	10928702	0	0	0	0	0	0	0	0	0	0	0	0	0	0	0	0	0	0	0	0	0	0	0	0	0	0	0	0	0	0	0	0	0	0	0	0	0	0
2.10931121.A_G.Mo98	2	10931121	A	G	0.026087	INTERGENIC	Mo98	AT2G25670	promoter	10930590	10932090	0	0	0	0	0	0	0	0	0	0	0	0	0	0	0	0	0	0	0	0	0	0	0	0	0	0	0	0	0	0	0	0	0	0	0	0	0	0
2.10931188.C_T.Mo98	2	10931188	C	T	0.026087	INTERGENIC	Mo98	AT2G25670	promoter	10930590	10932090	0	0	0	0	0	0	0	0	0	0	0	0	0	0	0	0	0	0	0	0	0	0	0	0	0	0	0	0	0	0	0	0	0	0	0	0	0	0
2.10931303.G_A.Mo98	2	10931303	G	A	0.026087	INTERGENIC	Mo98	AT2G25670	promoter	10930590	10932090	0	0	0	0	0	0	0	0	0	0	0	0	0	0	0	0	0	0	0	0	0	0	0	0	0	0	0	0	0	0	0	0	0	0	0	0	0	0
2.10931456.C_T.Mo98	2	10931456	C	T	0.026087	INTERGENIC	Mo98	AT2G25670	promoter	10930590	10932090	0	0	0	0	0	0	0	0	0	0	0	0	0	0	0	0	0	0	0	0	0	0	0	0	-1	0	0	0	0	0	0	0	0	0	0	0	0	0
2.10932670.A_T.Mo98	2	10932670	A	T	0.026087	INTERGENIC	Mo98	AT2G25680	terminator	10932004	10933504	0	0	0	0	0	0	0	0	0	0	0	0	0	0	0	0	0	0	0	0	0	0	0	0	0	0	0	0	0	0	0	0	0	0	0	0	0	0
2.10937845.G_A.Mo98	2	10937845	G	A	0.026087	NON_SYNONYMOUS_CODING	Mo98	AT2G25685	promoter	10937613	10939113	0	0	0	0	0	0	0	0	0	0	0	0	0	0	0	0	0	0	0	0	0	0	0	0	0	0	0	0	0	0	0	0	0	0	0	0	0	0
2.10931143.T_G.Mo98	2	10931143	T	G	0.026087	INTERGENIC	Mo98	AT2G25670	promoter	10930590	10932090	0	0	0	0	0	0	0	0	0	0	0	0	0	0	0	0	0	0	0	0	0	0	0	0	0	0	0	0	0	0	0	0	0	0	0	0	0	0
2.10932549.C_G.Mo98	2	10932549	C	G	0.026087	INTERGENIC	Mo98	AT2G25680	terminator	10932004	10933504	0	0	0	0	0	0	0	0	0	0	0	0	0	0	0	0	0	0	0	0	0	0	0	0	0	0	0	0	0	0	0	0	0	0	0	0	0	0
2.10932911.G_T.Mo98	2	10932911	G	T	0.026087	INTERGENIC	Mo98	AT2G25680	terminator	10932004	10933504	0	0	0	0	0	0	0	0	0	0	0	0	0	0	0	0	0	0	0	0	0	0	0	0	0	0	0	0	0	0	0	0	0	0	0	0	0	0
2.10933287.C_T.Mo98	2	10933287	C	T	0.026087	SYNONYMOUS_CODING	Mo98	AT2G25680	terminator	10932004	10933504	0	0	0	0	0	0	0	0	0	0	0	0	0	0	0	0	0	0	0	0	0	0	0	0	0	0	0	0	0	0	0	0	0	0	0	0	0	0
2.10933296.T_G.Mo98	2	10933296	T	G	0.026087	SYNONYMOUS_CODING	Mo98	AT2G25680	terminator	10932004	10933504	0	0	0	0	0	0	0	0	0	0	0	0	0	0	0	0	0	0	0	0	0	0	0	0	0	0	0	0	0	0	0	0	0	0	0	0	0	0
2.10933350.C_T.Mo98	2	10933350	C	T	0.026087	SYNONYMOUS_CODING	Mo98	AT2G25680	terminator	10932004	10933504	0	1	0	0	0	0	0	0	0	0	0	0	0	0	0	0	0	0	0	0	0	0	-1	0	0	0	0	0	0	0	0	0	0	0	0	0	0	0
2.10931288.T_A.Mo98	2	10931288	T	A	0.026087	INTERGENIC	Mo98	AT2G25670	promoter	10930590	10932090	0	0	0	0	0	0	0	0	0	0	0	0	0	0	0	0	0	0	0	0	0	0	0	0	0	0	0	0	0	0	0	0	0	0	0	0	0	0
2.10931412.C_A.Mo98	2	10931412	C	A	0.026087	INTERGENIC	Mo98	AT2G25670	promoter	10930590	10932090	0	0	0	0	0	0	0	0	0	0	0	0	0	0	0	0	0	0	0	0	0	0	0	0	0	0	0	0	0	0	0	0	0	0	0	0	0	0
2.10932899.A_T.Mo98	2	10932899	A	T	0.026087	INTERGENIC	Mo98	AT2G25680	terminator	10932004	10933504	0	0	0	0	0	0	0	0	0	0	0	0	0	0	0	0	0	0	0	0	0	0	0	0	0	0	0	0	0	0	0	0	0	0	0	0	0	0
2.10933254.A_T.Mo98	2	10933254	A	T	0.026087	SYNONYMOUS_CODING	Mo98	AT2G25680	terminator	10932004	10933504	0	0	0	0	0	0	0	0	0	0	0	0	0	0	0	0	0	0	0	0	0	0	0	0	0	0	0	0	0	0	0	0	0	0	0	0	0	0
2.10935358.T_A.Mo98	2	10935358	T	A	0.026087	INTERGENIC	Mo98	AT2G25680	promoter	10934104	10935604	0	0	0	0	0	0	0	0	0	0	0	0	0	0	0	0	0	0	0	0	0	0	0	0	0	0	0	0	0	0	0	0	0	0	0	0	0	0
2.10943072.G_T.Mo98	2	10943072	G	T	0.026087	INTERGENIC	Mo98	AT2G25690	promoter	10941954	10943454	0	0	0	0	0	0	0	0	0	0	0	0	0	0	0	0	0	0	0	0	0	0	0	0	0	0	0	0	0	0	0	0	0	0	0	0	0	0
2.10915892.A_C.Mo98	2	10915892	A	C	0.026087	SYNONYMOUS_CODING	Mo98	AT2G25650	terminator	10915716	10917216	0	0	0	0	0	0	0	0	0	0	0	0	0	0	0	0	0	0	0	0	0	0	0	0	0	0	0	0	0	0	0	0	0	0	0	0	0	0
2.10931146.G_T.Mo98	2	10931146	G	T	0.026087	INTERGENIC	Mo98	AT2G25670	promoter	10930590	10932090	0	0	0	0	0	0	0	0	0	0	0	0	0	0	0	0	0	0	0	0	0	0	0	0	0	0	0	0	0	0	0	0	0	0	0	0	0	0
2.10931192.T_A.Mo98	2	10931192	T	A	0.026087	INTERGENIC	Mo98	AT2G25670	promoter	10930590	10932090	0	0	0	0	0	0	0	0	0	0	0	0	0	0	0	0	0	0	0	0	0	0	0	0	0	0	0	0	0	0	0	0	0	0	0	0	0	0
2.10932345.T_A.Mo98	2	10932345	T	A	0.026087	INTERGENIC	Mo98	AT2G25680	terminator	10932004	10933504	0	0	0	0	0	0	0	0	0	0	0	0	0	0	0	0	0	0	0	0	0	0	0	0	0	0	0	1	0	0	0	0	0	0	0	0	0	0
2.10932825.G_T.Mo98	2	10932825	G	T	0.026087	INTERGENIC	Mo98	AT2G25680	terminator	10932004	10933504	0	0	0	0	0	0	0	0	0	0	0	0	0	0	0	0	0	0	0	0	0	0	0	0	0	0	0	0	0	0	0	0	0	0	0	0	0	0
2.10933305.C_T.Mo98	2	10933305	C	T	0.026087	NON_SYNONYMOUS_CODING	Mo98	AT2G25680	terminator	10932004	10933504	0	0	0	0	0	0	0	0	0	0	0	0	0	0	0	0	0	0	0	0	0	0	0	0	0	0	0	0	0	0	0	0	0	0	0	0	0	0
2.10931191.T_C.Mo98	2	10931191	T	C	0.026087	INTERGENIC	Mo98	AT2G25670	promoter	10930590	10932090	0	0	0	0	0	0	0	0	0	0	0	0	0	0	0	0	0	0	0	0	0	0	0	0	0	0	0	0	0	0	0	0	0	0	0	0	0	0
2.10931193.C_T.Mo98	2	10931193	C	T	0.026087	INTERGENIC	Mo98	AT2G25670	promoter	10930590	10932090	0	0	0	0	0	0	0	0	0	0	0	0	0	0	0	0	0	0	0	0	0	0	0	0	0	0	0	0	0	0	0	0	0	0	0	0	0	0
2.10931368.T_C.Mo98	2	10931368	T	C	0.026087	INTERGENIC	Mo98	AT2G25670	promoter	10930590	10932090	0	0	0	0	0	0	0	0	0	0	0	0	0	0	0	0	0	0	0	0	0	0	0	0	0	0	0	0	0	0	0	0	0	0	0	0	0	0
2.10932902.T_C.Mo98	2	10932902	T	C	0.026087	INTERGENIC	Mo98	AT2G25680	terminator	10932004	10933504	0	0	0	0	0	0	0	0	0	0	0	0	0	0	0	0	0	0	0	0	0	0	0	0	0	0	0	0	0	0	0	0	0	0	0	0	0	0
2.10937995.C_A.Mo98	2	10937995	C	A	0.026087	INTRON	Mo98	AT2G25685	promoter	10937613	10939113	0	0	0	0	0	0	0	0	0	0	0	0	0	0	0	0	0	0	0	0	0	0	0	0	0	0	0	0	0	0	0	0	0	0	0	0	0	0
2.10915908.A_T.Mo98	2	10915908	A	T	0.026087	NON_SYNONYMOUS_CODING	Mo98	AT2G25650	terminator	10915716	10917216	0	0	0	0	0	0	0	0	0	0	0	0	0	0	0	0	0	0	0	0	0	0	0	0	0	0	0	0	0	0	0	0	0	0	0	0	0	0
2.10916027.T_C.Mo98	2	10916027	T	C	0.026087	UTR_3_PRIME	Mo98	AT2G25650	terminator	10915716	10917216	0	0	0	0	0	0	0	0	0	0	0	0	0	0	0	0	0	0	0	0	0	0	0	0	0	0	0	0	0	0	0	0	0	0	0	0	0	0
2.10931350.G_T.Mo98	2	10931350	G	T	0.026087	INTERGENIC	Mo98	AT2G25670	promoter	10930590	10932090	0	0	0	0	0	0	0	0	0	0	0	0	0	0	0	0	0	0	0	0	0	0	0	0	0	0	0	0	0	0	0	0	0	0	0	0	0	0
2.10932694.T_C.Mo98	2	10932694	T	C	0.026087	INTERGENIC	Mo98	AT2G25680	terminator	10932004	10933504	0	0	0	0	0	0	0	0	0	0	0	0	0	0	0	0	0	0	0	0	0	0	0	0	0	0	0	0	0	0	0	0	0	0	0	0	0	0
2.10933298.A_C.Mo98	2	10933298	A	C	0.026087	NON_SYNONYMOUS_CODING	Mo98	AT2G25680	terminator	10932004	10933504	0	0	0	0	0	0	0	0	0	0	0	0	0	0	0	0	0	0	0	0	0	0	0	0	0	0	0	0	0	0	0	0	0	0	0	0	0	0
2.10916017.T_A.Mo98	2	10916017	T	A	0.026087	UTR_3_PRIME	Mo98	AT2G25650	terminator	10915716	10917216	0	0	0	0	0	0	0	0	0	0	0	0	0	0	0	0	0	0	0	0	0	0	0	0	0	0	0	0	0	0	0	0	0	0	0	0	0	0
2.10931166.G_T.Mo98	2	10931166	G	T	0.026087	INTERGENIC	Mo98	AT2G25670	promoter	10930590	10932090	0	0	0	0	0	0	0	0	0	0	0	0	0	0	0	0	0	0	0	0	0	0	0	0	0	0	0	0	0	0	0	0	0	0	0	0	0	0
2.10931467.G_A.Mo98	2	10931467	G	A	0.026087	INTERGENIC	Mo98	AT2G25670	promoter	10930590	10932090	0	0	0	0	0	0	0	0	0	0	0	0	0	0	0	0	0	0	0	0	0	0	0	0	-1	0	0	0	0	0	0	0	0	0	0	0	0	0
2.10933226.G_T.Mo98	2	10933226	G	T	0.026087	SYNONYMOUS_CODING	Mo98	AT2G25680	terminator	10932004	10933504	0	0	0	0	0	0	0	0	0	0	0	0	0	0	0	0	0	0	0	0	0	0	0	0	0	0	0	0	0	0	0	0	0	0	0	0	0	0
2.10935187.C_T.Mo98	2	10935187	C	T	0.026087	INTERGENIC	Mo98	AT2G25680	promoter	10934104	10935604	0	0	0	0	0	0	0	0	0	0	0	0	0	0	0	0	0	0	0	0	0	0	0	0	0	0	0	0	0	0	0	0	0	0	0	0	0	0
2.10939635.T_A.Mo98	2	10939635	T	A	0.026087	INTERGENIC	Mo98	AT2G25690	terminator	10939070	10940570	0	0	0	0	0	0	0	0	0	0	0	0	0	0	0	0	0	0	0	0	0	0	0	0	0	0	0	0	1	0	0	0	0	0	0	0	0	0
2.11037848.A_G.clim-gs10	2	11037848	A	G	0.0598802	SYNONYMOUS_CODING	clim-gs10	AT2G25890	terminator	11037679	11039179	0	-1	0	0	0	0	0	0	0	0	0	0	0	0	0	0	0	0	0	0	0	0	0	0	0	0	0	0	0	0	0	0	0	0	0	0	0	0
2.6787204.A_T.clim-prec10	2	6787204	A	T	0.0139721	INTERGENIC	clim-prec10	AT2G15560	terminator	6786865	6788365	0	0	0	0	0	0	0	0	0	0	0	0	0	0	0	0	0	0	0	0	0	0	0	0	0	0	0	0	0	0	1	0	0	0	0	0	0	0
2.10915049.T_C.Mo98	2	10915049	T	C	0.0231884	INTRON	Mo98	AT2G25640	terminator	10914047	10915547	0	0	0	0	0	0	0	0	0	0	0	0	0	0	0	0	0	0	0	0	0	0	0	0	0	0	0	0	0	0	0	0	0	0	0	0	0	0
2.10915536.C_T.Mo98	2	10915536	C	T	0.0231884	NON_SYNONYMOUS_CODING	Mo98	AT2G25640	terminator	10914047	10915547	0	0	0	0	0	0	0	0	0	0	0	0	0	0	0	0	0	0	0	0	0	0	0	0	0	0	0	0	0	0	0	0	0	0	0	0	0	0
2.10973034.T_A.Mo98	2	10973034	T	A	0.0231884	INTERGENIC	Mo98	AT2G25730	promoter	10972451	10973951	0	0	0	0	0	0	0	0	0	0	0	0	0	0	0	0	0	0	0	0	0	0	0	0	0	0	0	0	0	0	0	-1	0	0	0	0	0	0
2.10915169.T_G.Mo98	2	10915169	T	G	0.0231884	SYNONYMOUS_CODING	Mo98	AT2G25640	terminator	10914047	10915547	0	0	0	0	0	0	0	0	0	0	0	0	0	0	0	0	0	0	0	0	0	0	0	0	0	0	0	0	0	0	0	0	0	0	0	0	0	0
2.10915682.T_C.Mo98	2	10915682	T	C	0.0231884	SYNONYMOUS_CODING	Mo98	AT2G25660	terminator	10914306	10915806	0	0	0	0	0	0	0	0	0	0	0	0	0	0	0	0	0	0	0	0	0	0	0	0	0	0	0	0	0	0	0	0	0	0	0	0	0	0
2.10914898.G_A.Mo98	2	10914898	G	A	0.0231884	NON_SYNONYMOUS_CODING	Mo98	AT2G25640	terminator	10914047	10915547	0	0	0	0	0	0	0	0	0	0	0	0	0	0	0	0	0	0	0	0	0	0	0	0	0	0	0	0	0	0	0	0	0	0	0	0	0	0
2.10915462.A_G.Mo98	2	10915462	A	G	0.0231884	NON_SYNONYMOUS_CODING	Mo98	AT2G25640	terminator	10914047	10915547	0	0	0	0	0	0	0	0	0	0	0	0	0	0	0	0	0	0	0	0	0	0	0	0	0	0	0	0	0	0	0	0	0	0	0	0	0	0
2.10972646.T_C.Mo98	2	10972646	T	C	0.0231884	SYNONYMOUS_CODING	Mo98	AT2G25730	promoter	10972451	10973951	0	0	0	0	0	0	0	0	0	0	0	0	0	0	0	0	0	0	0	0	0	0	0	0	0	0	0	0	0	0	0	0	0	0	0	0	0	0
2.10975756.T_C.Mo98	2	10975756	T	C	0.0231884	UTR_5_PRIME	Mo98	AT2G25735	promoter	10975416	10976916	0	0	0	0	0	0	0	0	0	0	0	0	0	0	0	0	0	0	0	0	0	0	0	0	0	0	0	0	0	0	0	0	0	0	0	0	0	0
2.10914270.C_A.Mo98	2	10914270	C	A	0.0231884	INTERGENIC	Mo98	AT2G25640	terminator	10914047	10915547	0	0	0	0	0	0	0	0	0	0	0	0	0	0	0	0	0	0	0	0	0	0	0	0	0	0	0	0	0	0	0	0	0	0	0	0	0	0
2.10974673.C_A.Mo98	2	10974673	C	A	0.0231884	INTERGENIC	Mo98	AT2G25735	terminator	10973654	10975154	0	0	0	0	0	0	0	0	0	0	0	0	0	0	0	0	0	0	0	0	0	0	0	0	0	0	0	0	0	0	0	0	0	0	0	0	0	0
2.10972784.A_G.Mo98	2	10972784	A	G	0.0231884	UTR_5_PRIME	Mo98	AT2G25730	promoter	10972451	10973951	0	0	0	0	0	0	0	0	0	0	0	0	0	0	0	0	0	0	0	0	0	0	0	0	0	0	0	0	0	0	0	0	0	0	0	0	0	0
2.10973147.T_A.Mo98	2	10973147	T	A	0.0231884	INTERGENIC	Mo98	AT2G25730	promoter	10972451	10973951	0	0	0	0	0	0	0	0	0	0	0	0	0	0	0	0	0	0	0	0	0	0	0	0	0	0	0	0	0	0	0	0	0	0	0	0	0	0
2.10914803.T_A.Mo98	2	10914803	T	A	0.0231884	SYNONYMOUS_CODING	Mo98	AT2G25640	terminator	10914047	10915547	0	0	0	0	0	0	0	0	0	0	0	0	0	0	0	0	0	0	0	0	0	0	0	0	0	0	0	0	0	0	0	0	0	0	0	0	0	0
2.10914840.G_A.Mo98	2	10914840	G	A	0.0231884	NON_SYNONYMOUS_CODING	Mo98	AT2G25640	terminator	10914047	10915547	0	0	0	0	0	0	0	0	0	0	0	0	0	0	0	0	0	0	1	0	0	0	0	0	0	0	0	0	0	0	0	0	0	0	0	0	0	0
2.10915436.G_T.Mo98	2	10915436	G	T	0.0231884	NON_SYNONYMOUS_CODING	Mo98	AT2G25640	terminator	10914047	10915547	0	0	0	0	0	0	0	0	0	0	0	0	0	0	0	0	0	0	0	0	0	0	0	0	0	0	0	0	0	0	0	0	0	0	0	0	0	0
2.10915616.C_A.Mo98	2	10915616	C	A	0.0231884	NON_SYNONYMOUS_CODING	Mo98	AT2G25660	terminator	10914306	10915806	0	0	0	0	0	0	0	0	0	0	0	0	0	0	0	0	0	0	0	0	0	0	0	0	0	0	0	0	0	0	0	0	0	0	0	0	0	0
2.10915677.G_A.Mo98	2	10915677	G	A	0.0231884	NON_SYNONYMOUS_CODING	Mo98	AT2G25660	terminator	10914306	10915806	0	0	0	0	0	0	0	0	0	0	0	0	0	0	0	0	0	0	0	0	0	0	0	0	0	0	0	0	0	0	0	0	0	0	0	0	0	0
2.10910376.T_C.Mo98	2	10910376	T	C	0.0231884	INTERGENIC	Mo98	AT2G25630	terminator	10909380	10910880	0	0	0	0	0	0	0	0	0	0	0	0	0	0	0	0	0	0	0	0	0	0	0	0	0	0	0	0	0	0	0	0	0	0	0	0	0	0
2.10915059.A_G.Mo98	2	10915059	A	G	0.0231884	INTRON	Mo98	AT2G25640	terminator	10914047	10915547	0	0	0	0	0	0	0	0	0	0	0	0	0	0	0	0	0	0	0	0	0	0	0	0	0	0	0	0	0	0	0	0	0	0	0	0	0	0
2.10915368.A_G.Mo98	2	10915368	A	G	0.0231884	NON_SYNONYMOUS_CODING	Mo98	AT2G25640	terminator	10914047	10915547	0	0	0	0	0	0	0	0	0	0	0	0	0	0	0	0	0	0	0	0	0	0	0	0	0	0	0	0	0	0	0	0	0	0	0	0	0	0
2.10915584.T_G.Mo98	2	10915584	T	G	0.0231884	NON_SYNONYMOUS_CODING	Mo98	AT2G25660	terminator	10914306	10915806	0	0	0	0	0	0	0	0	0	0	0	0	0	0	0	0	0	0	0	0	0	0	0	0	0	0	0	0	0	0	0	0	0	0	0	0	0	0
2.10914316.C_G.Mo98	2	10914316	C	G	0.0231884	INTERGENIC	Mo98	AT2G25640	terminator	10914047	10915547	0	0	0	0	0	0	0	0	0	0	0	0	0	0	0	0	0	0	0	0	0	0	0	0	0	0	0	0	0	0	0	0	0	0	0	0	0	0
2.10915669.T_C.Mo98	2	10915669	T	C	0.0231884	NON_SYNONYMOUS_CODING	Mo98	AT2G25660	terminator	10914306	10915806	0	0	0	0	0	0	0	0	0	0	0	0	0	0	0	0	0	0	0	0	0	0	0	0	0	0	0	0	0	0	0	0	0	0	0	0	0	0
2.10972778.A_C.Mo98	2	10972778	A	C	0.0231884	.	Mo98	AT2G25730	promoter	10972451	10973951	0	0	0	0	0	0	0	0	0	0	0	0	0	0	0	0	0	0	0	0	0	0	0	0	0	-1	0	0	0	0	0	0	0	0	0	0	0	0
2.10973808.G_A.Mo98	2	10973808	G	A	0.0231884	INTERGENIC	Mo98	AT2G25735	terminator	10973654	10975154	0	0	0	0	0	0	0	0	0	0	0	0	0	0	0	0	0	0	1	0	0	0	0	0	0	0	0	0	0	0	0	0	0	0	0	0	0	0
2.10914802.G_A.Mo98	2	10914802	G	A	0.0231884	NON_SYNONYMOUS_CODING	Mo98	AT2G25640	terminator	10914047	10915547	0	0	0	0	0	0	0	0	0	0	0	0	0	0	0	0	0	0	0	0	0	0	0	0	0	0	0	0	0	0	0	0	0	0	0	0	0	0
2.10915511.C_T.Mo98	2	10915511	C	T	0.0231884	SYNONYMOUS_CODING	Mo98	AT2G25640	terminator	10914047	10915547	0	0	0	0	0	0	0	0	0	0	0	0	0	0	0	0	0	0	0	0	0	0	0	0	0	0	0	0	0	0	0	0	0	0	0	0	0	0
2.8324695.G_T.clim-gs10	2	8324695	G	T	0.0459082	INTERGENIC	clim-gs10	AT2G19180	promoter	8323652	8325152	0	0	0	0	0	0	0	0	0	0	0	0	0	0	0	0	0	0	0	0	0	0	0	0	0	0	0	0	0	0	0	0	0	0	0	0	0	0
2.8352287.C_G.clim-gs10	2	8352287	C	G	0.0459082	INTRON	clim-gs10	AT2G19240	promoter	8352062	8353562	0	0	0	0	0	0	0	0	0	0	0	0	0	0	0	0	0	0	0	0	0	0	0	0	0	0	0	0	0	0	0	0	0	0	0	0	0	0
2.8352934.A_C.clim-gs10	2	8352934	A	C	0.0459082	INTRAGENIC	clim-gs10	AT2G19240	promoter	8352062	8353562	0	0	0	0	0	0	0	0	0	0	0	0	0	0	0	0	0	0	0	0	0	0	0	0	0	0	0	0	0	0	0	0	0	0	0	0	0	0
2.8355144.T_G.clim-gs10	2	8355144	T	G	0.0459082	INTRAGENIC	clim-gs10	AT2G19260	promoter	8355091	8356591	0	0	1	0	0	0	0	0	0	0	0	0	0	0	0	0	0	0	0	0	0	0	0	0	0	0	0	0	0	0	0	0	0	0	0	0	0	0
2.8366611.C_T.clim-gs10	2	8366611	C	T	0.0459082	INTRON	clim-gs10	AT2G19280	terminator	8365644	8367144	0	0	0	0	0	0	0	0	0	0	0	0	0	0	0	0	0	0	0	0	0	0	0	0	0	0	0	0	0	0	0	0	0	0	0	0	0	0
2.8366628.T_C.clim-gs10	2	8366628	T	C	0.0459082	INTRON	clim-gs10	AT2G19280	terminator	8365644	8367144	0	0	0	0	0	0	0	0	0	0	0	0	0	0	0	0	0	0	0	0	0	0	0	0	0	0	0	0	0	0	0	0	0	0	0	0	0	0
2.8366732.C_T.clim-gs10	2	8366732	C	T	0.0459082	INTRON	clim-gs10	AT2G19280	terminator	8365644	8367144	0	0	0	0	0	0	0	0	0	0	0	0	0	0	0	0	0	0	0	0	0	0	0	0	0	0	0	1	0	0	0	0	0	0	0	0	0	0
2.8370578.C_T.clim-gs10	2	8370578	C	T	0.0459082	INTERGENIC	clim-gs10	AT2G19310	promoter	8370175	8371675	0	0	0	0	0	0	0	0	0	0	0	0	0	0	0	0	0	0	0	0	0	0	0	0	0	0	0	0	0	0	0	0	0	0	0	0	0	0
2.8370628.G_A.clim-gs10	2	8370628	G	A	0.0459082	INTERGENIC	clim-gs10	AT2G19310	promoter	8370175	8371675	0	0	0	0	0	0	0	0	0	0	0	0	0	0	0	0	0	0	0	0	0	0	0	0	0	0	0	0	0	0	0	0	0	0	0	0	0	0
2.8375040.G_T.clim-gs10	2	8375040	G	T	0.0459082	INTRON	clim-gs10	AT2G19330	terminator	8373953	8375453	0	0	0	0	0	0	0	0	0	0	0	0	0	0	0	0	0	0	0	0	0	0	0	0	0	0	0	0	0	0	0	0	0	0	0	0	0	0
2.8366250.A_T.clim-gs10	2	8366250	A	T	0.0459082	INTRON	clim-gs10	AT2G19280	terminator	8365644	8367144	0	0	0	0	0	0	0	0	0	0	0	0	0	0	0	0	0	0	0	0	0	0	0	0	0	0	0	0	1	0	0	0	0	0	0	0	0	0
2.8373612.G_T.clim-gs10	2	8373612	G	T	0.0459082	NON_SYNONYMOUS_CODING	clim-gs10	AT2G19340	terminator	8372765	8374265	0	0	0	0	0	0	0	0	0	0	0	0	0	0	0	0	0	0	0	0	0	0	0	0	0	0	0	0	0	0	0	0	0	0	0	0	0	0
2.8386881.T_A.clim-gs10	2	8386881	T	A	0.0459082	INTERGENIC	clim-gs10	AT2G19385	promoter	8385932	8387432	0	0	0	0	0	0	0	0	0	0	0	0	0	0	0	0	0	0	0	0	0	0	0	0	0	0	0	0	0	0	0	0	0	0	0	0	0	0
2.8327141.T_A.clim-gs10	2	8327141	T	A	0.0459082	INTRON	clim-gs10	AT2G19180	terminator	8325723	8327223	0	0	0	0	0	0	0	0	0	0	0	0	0	0	0	0	0	0	0	0	0	0	0	0	0	0	0	0	0	0	0	0	0	0	0	0	0	0
2.8352090.T_C.clim-gs10	2	8352090	T	C	0.0459082	INTRON	clim-gs10	AT2G19240	promoter	8352062	8353562	0	0	0	0	0	0	0	0	0	0	0	0	0	0	0	0	0	0	0	0	0	0	0	0	0	0	0	0	0	0	0	0	0	0	0	0	0	0
2.8356271.G_T.clim-gs10	2	8356271	G	T	0.0459082	.	clim-gs10	AT2G19260	promoter	8355091	8356591	0	0	0	0	0	0	0	0	0	0	0	0	0	0	0	0	0	0	0	0	0	0	0	0	0	0	0	0	0	0	0	0	0	0	0	0	0	0
2.8359789.T_G.clim-gs10	2	8359789	T	G	0.0459082	INTRON	clim-gs10	AT2G19260	terminator	8359712	8361212	0	0	0	0	0	0	0	0	0	0	0	0	0	0	0	0	0	0	1	0	0	0	0	0	0	0	0	0	0	0	0	0	0	0	0	0	0	0
2.8367087.T_G.clim-gs10	2	8367087	T	G	0.0459082	INTERGENIC	clim-gs10	AT2G19280	terminator	8365644	8367144	0	0	0	0	0	0	0	0	0	0	0	0	0	0	0	0	0	0	0	0	0	0	0	0	0	0	0	0	0	0	0	0	0	0	0	0	0	0
2.8378314.A_T.clim-gs10	2	8378314	A	T	0.0459082	INTERGENIC	clim-gs10	AT2G19350	terminator	8376856	8378356	0	0	0	0	0	0	0	0	0	0	0	0	0	0	0	0	0	0	0	0	0	0	0	0	0	0	0	0	0	0	0	0	0	0	0	0	0	0
2.8389768.A_G.clim-gs10	2	8389768	A	G	0.0459082	INTERGENIC	clim-gs10	AT2G19390	terminator	8388609	8390109	0	0	0	0	0	0	0	0	0	0	0	0	0	0	0	0	0	0	0	0	0	0	0	0	0	0	0	0	0	0	0	0	0	0	0	0	0	0
2.8399282.T_C.clim-gs10	2	8399282	T	C	0.0459082	UTR_3_PRIME	clim-gs10	AT2G19400	terminator	8398099	8399599	0	0	0	0	0	0	0	0	0	0	0	0	0	0	0	0	0	0	0	0	0	0	0	0	0	0	0	0	0	0	0	0	0	0	0	0	0	0
2.8387530.C_T.clim-gs10	2	8387530	C	T	0.0459082	NON_SYNONYMOUS_CODING	clim-gs10	AT2G19380	terminator	8386512	8388012	0	0	0	0	0	0	0	0	0	0	0	0	0	0	0	0	0	0	0	0	0	0	0	0	0	0	0	0	0	0	0	0	0	0	0	0	0	0
2.8326209.G_A.clim-gs10	2	8326209	G	A	0.0459082	NON_SYNONYMOUS_CODING	clim-gs10	AT2G19190	terminator	8325048	8326548	0	0	0	0	0	0	0	0	0	0	0	0	0	0	0	0	0	0	0	0	0	0	0	0	0	0	0	0	0	0	0	0	0	0	0	0	0	0
2.8352288.A_T.clim-gs10	2	8352288	A	T	0.0459082	INTRON	clim-gs10	AT2G19240	promoter	8352062	8353562	0	0	0	0	0	0	0	0	0	0	0	0	0	0	0	0	0	0	0	0	0	0	0	0	0	0	0	0	0	0	0	0	0	0	0	0	0	0
2.8359902.A_G.clim-gs10	2	8359902	A	G	0.0459082	NON_SYNONYMOUS_CODING	clim-gs10	AT2G19260	terminator	8359712	8361212	0	0	0	0	0	0	0	0	0	0	0	0	0	0	0	0	0	0	0	0	0	0	0	0	0	0	0	0	0	0	0	0	0	0	0	0	0	0
2.8365785.G_A.clim-gs10	2	8365785	G	A	0.0459082	UTR_3_PRIME	clim-gs10	AT2G19280	terminator	8365644	8367144	0	0	0	0	0	-1	0	0	0	0	0	0	0	0	0	0	0	0	0	0	0	0	0	0	0	0	0	0	0	0	0	0	0	0	0	0	0	0
2.8367612.G_T.clim-gs10	2	8367612	G	T	0.0459082	INTERGENIC	clim-gs10	AT2G19290	promoter	8366522	8368022	0	0	0	0	0	0	0	0	0	0	0	0	0	0	0	0	0	0	0	0	0	0	0	0	0	0	0	0	0	0	0	0	0	0	0	0	0	0
2.8384085.A_G.clim-gs10	2	8384085	A	G	0.0459082	NON_SYNONYMOUS_CODING	clim-gs10	AT2G19360	terminator	8382874	8384374	0	0	0	0	0	0	0	0	0	0	0	0	0	0	0	0	0	0	0	0	0	0	0	0	0	0	0	0	0	0	0	0	0	0	0	0	0	0
2.8398962.C_T.clim-gs10	2	8398962	C	T	0.0459082	INTERGENIC	clim-gs10	AT2G19400	terminator	8398099	8399599	0	0	0	0	0	0	0	0	0	1	0	0	0	0	0	0	0	0	0	0	0	0	0	0	0	0	0	0	0	0	0	0	0	0	0	0	0	0
2.8403913.G_A.clim-gs10	2	8403913	G	A	0.0459082	INTERGENIC	clim-gs10	AT2G19410	terminator	8403763	8405263	0	0	0	0	0	0	0	0	0	0	0	0	0	0	0	0	0	0	0	0	0	0	0	0	0	0	0	0	-1	0	0	0	0	0	0	0	0	0
2.8404395.T_A.clim-gs10	2	8404395	T	A	0.0459082	INTERGENIC	clim-gs10	AT2G19410	terminator	8403763	8405263	0	0	0	0	0	0	0	0	0	0	0	0	0	0	0	0	0	0	0	0	0	0	0	0	0	0	0	0	0	0	0	0	0	0	0	0	0	0
2.18386226.A_T.clim-pet12	2	18386226	A	T	0.011976	UTR_3_PRIME	clim-pet12	AT2G44540	terminator	18385218	18386718	0	0	0	0	0	0	0	0	0	0	0	0	0	0	0	0	0	0	0	0	0	0	0	0	0	0	0	0	0	0	0	0	0	0	0	0	0	0
2.10914941.T_A.Mo98	2	10914941	T	A	0.0521739	NON_SYNONYMOUS_CODING	Mo98	AT2G25640	terminator	10914047	10915547	0	0	0	0	0	0	0	0	0	0	0	0	0	0	0	0	0	0	0	0	0	0	0	0	0	0	0	0	0	0	0	0	0	0	0	0	0	0
2.10915235.T_C.Mo98	2	10915235	T	C	0.0521739	SYNONYMOUS_CODING	Mo98	AT2G25640	terminator	10914047	10915547	0	0	0	0	0	0	0	0	0	0	0	0	0	0	0	0	0	0	0	0	0	0	0	0	0	0	0	0	0	0	0	0	0	0	0	0	0	0
2.10915258.A_G.Mo98	2	10915258	A	G	0.0521739	NON_SYNONYMOUS_CODING	Mo98	AT2G25640	terminator	10914047	10915547	0	0	0	0	0	0	0	0	0	0	0	0	0	0	0	0	0	0	0	0	0	0	0	0	0	0	0	0	0	0	0	0	0	0	0	0	0	0
2.10915243.A_G.Mo98	2	10915243	A	G	0.0521739	NON_SYNONYMOUS_CODING	Mo98	AT2G25640	terminator	10914047	10915547	0	0	0	0	0	0	0	0	0	0	0	0	0	0	0	0	0	0	-1	0	0	0	0	0	0	0	0	0	0	0	0	0	0	0	0	0	0	0
2.10915249.G_A.Mo98	2	10915249	G	A	0.0521739	NON_SYNONYMOUS_CODING	Mo98	AT2G25640	terminator	10914047	10915547	0	0	0	0	0	0	0	0	0	0	0	0	0	0	0	0	0	0	0	0	0	0	0	0	0	0	0	0	0	0	0	0	0	0	0	0	0	0
2.10915191.G_A.Mo98	2	10915191	G	A	0.0405797	NON_SYNONYMOUS_CODING	Mo98	AT2G25640	terminator	10914047	10915547	0	0	0	0	0	0	0	0	0	0	0	0	0	0	0	0	0	0	0	0	0	0	0	0	0	0	0	0	0	0	0	0	0	0	0	0	0	0
2.10915157.A_C.Mo98	2	10915157	A	C	0.0405797	SYNONYMOUS_CODING	Mo98	AT2G25640	terminator	10914047	10915547	0	0	0	0	0	0	0	0	0	0	0	0	0	0	0	0	0	0	0	0	0	0	0	0	0	0	0	0	0	0	0	0	0	0	0	0	0	0
2.10915187.G_T.Mo98	2	10915187	G	T	0.0405797	NON_SYNONYMOUS_CODING	Mo98	AT2G25640	terminator	10914047	10915547	0	0	0	0	0	0	0	0	0	0	-1	0	0	0	0	0	0	0	0	0	0	0	0	0	0	0	0	0	0	0	0	0	0	0	0	0	0	0
2.8928225.C_A.clim-gs10	2	8928225	C	A	0.0459082	NON_SYNONYMOUS_CODING	clim-gs10	AT2G20710	terminator	8927344	8928844	0	0	0	0	0	0	0	0	0	0	0	0	0	0	0	0	0	0	0	0	0	0	0	0	0	0	0	0	0	0	0	0	0	0	0	0	0	0
2.15665194.T_G.clim-gs10	2	15665194	T	G	0.0459082	NON_SYNONYMOUS_CODING	clim-gs10	AT2G37310	terminator	15663799	15665299	0	0	0	0	0	0	0	0	0	0	0	0	0	0	0	0	0	0	0	0	0	0	0	0	0	0	0	0	0	0	0	0	0	0	0	0	0	0
2.15665516.C_T.clim-gs10	2	15665516	C	T	0.0459082	SYNONYMOUS_CODING	clim-gs10	AT2G37300	promoter	15664099	15665599	0	0	0	0	0	0	0	0	0	0	0	0	0	0	0	0	0	0	0	0	0	0	0	0	0	0	0	0	0	0	0	0	0	0	0	0	0	0
2.17006117.T_C.clim-bio4	2	17006117	T	C	0.0419162	INTERGENIC	clim-bio4	AT2G09180	terminator	17005643	17007143	0	0	0	0	0	0	0	0	0	0	0	0	0	0	0	0	0	0	0	0	0	0	0	0	0	0	0	0	0	0	0	0	0	0	0	0	0	0
2.17013179.T_C.clim-bio4	2	17013179	T	C	0.0419162	UTR_3_PRIME	clim-bio4	AT2G40770	terminator	17012268	17013768	0	0	0	0	0	0	0	0	0	0	0	0	0	0	0	0	0	0	0	0	0	0	1	0	0	0	0	0	0	0	0	0	0	0	0	0	0	0
2.17028014.G_A.clim-bio4	2	17028014	G	A	0.0419162	INTERGENIC	clim-bio4	AT2G40800	promoter	17026522	17028022	0	0	0	0	0	0	0	0	0	0	0	0	0	0	0	0	0	0	0	0	0	0	0	0	0	0	0	0	0	0	0	0	0	0	0	0	0	0
2.17029059.C_G.clim-bio4	2	17029059	C	G	0.0419162	INTERGENIC	clim-bio4	AT2G40805	promoter	17028700	17030200	0	0	0	0	0	0	0	0	0	0	0	0	0	0	0	0	0	0	0	0	0	0	0	0	0	0	0	0	0	0	0	0	0	0	0	0	0	0
2.17035197.T_C.clim-bio4	2	17035197	T	C	0.0419162	NON_SYNONYMOUS_CODING	clim-bio4	AT2G40810	terminator	17034100	17035600	0	0	0	0	0	0	0	0	0	0	0	1	0	0	0	0	0	0	0	0	0	0	0	0	0	0	0	0	0	0	0	0	0	0	0	0	0	0
2.17040905.A_G.clim-bio4	2	17040905	A	G	0.0419162	INTERGENIC	clim-bio4	AT2G40820	promoter	17039858	17041358	0	0	0	0	0	0	0	0	0	0	0	0	0	0	0	0	0	0	0	0	0	0	0	0	0	0	0	0	0	0	0	0	0	0	0	0	0	0
2.17021183.C_G.clim-bio4	2	17021183	C	G	0.0419162	NON_SYNONYMOUS_CODING	clim-bio4	AT2G40780	promoter	17020504	17022004	0	0	0	0	0	0	0	0	0	0	0	0	0	0	0	0	0	0	0	0	0	0	0	0	0	0	0	0	0	0	0	0	0	0	0	0	0	0
2.17027539.A_G.clim-bio4	2	17027539	A	G	0.0419162	INTERGENIC	clim-bio4	AT2G40800	promoter	17026522	17028022	0	0	0	0	0	0	0	0	0	0	0	0	0	0	0	0	0	0	0	0	0	0	0	0	0	0	0	0	0	0	0	0	0	0	0	0	0	0
2.17031712.T_A.clim-bio4	2	17031712	T	A	0.0419162	INTERGENIC	clim-bio4	AT2G40810	promoter	17031411	17032911	0	0	0	0	0	0	0	0	0	0	0	0	0	0	0	0	0	0	0	0	0	0	0	0	0	0	0	0	0	0	0	0	0	0	0	0	0	0
2.17043045.C_G.clim-bio4	2	17043045	C	G	0.0419162	INTRON	clim-bio4	AT2G40830	promoter	17041622	17043122	0	0	0	0	0	0	0	0	0	0	0	0	0	0	0	0	0	0	0	0	0	0	0	0	0	0	0	0	0	0	0	0	0	0	0	0	0	0
2.17008206.T_G.clim-bio4	2	17008206	T	G	0.0419162	UTR_3_PRIME	clim-bio4	AT2G40745	terminator	17007173	17008673	0	0	0	0	0	0	0	0	0	0	0	0	0	0	0	0	0	0	0	0	0	0	0	0	0	0	0	0	0	0	0	0	0	0	0	0	0	0
2.17008386.G_A.clim-bio4	2	17008386	G	A	0.0419162	NON_SYNONYMOUS_CODING	clim-bio4	AT2G40745	terminator	17007173	17008673	0	0	0	0	0	0	0	0	0	0	0	0	0	0	0	0	0	0	0	0	0	0	0	0	0	0	0	0	0	0	0	0	0	0	0	0	0	0
2.17041667.T_C.clim-bio4	2	17041667	T	C	0.0419162	INTERGENIC	clim-bio4	AT2G40830	promoter	17041622	17043122	0	0	0	0	0	0	0	0	0	0	0	0	0	0	0	0	0	0	0	0	0	0	0	0	0	0	0	0	0	0	0	0	0	0	0	0	0	0
2.17023588.T_C.clim-bio4	2	17023588	T	C	0.0419162	NON_SYNONYMOUS_CODING	clim-bio4	AT2G40800	terminator	17023254	17024754	0	0	0	0	0	0	0	0	0	0	0	0	0	0	0	0	0	0	0	0	0	0	0	0	0	0	0	0	0	0	0	0	0	0	0	0	0	0
2.17030869.A_T.clim-bio4	2	17030869	A	T	0.0419162	INTERGENIC	clim-bio4	AT2G09195	promoter	17029958	17031458	0	0	0	0	0	0	0	0	0	0	0	0	0	0	0	0	0	0	0	0	0	0	0	0	0	0	0	0	0	0	0	1	0	0	0	0	0	0
2.10956609.A_C.Mo98	2	10956609	A	C	0.0289855	UTR_3_PRIME	Mo98	AT2G25730	terminator	10955262	10956762	0	0	0	0	0	0	0	0	0	0	0	0	0	0	0	0	0	0	0	0	0	0	0	0	0	0	0	0	0	0	0	0	0	1	0	0	0	0
2.8983483.G_T.clim-gs10	2	8983483	G	T	0.0758483	INTRON	clim-gs10	AT2G20870	promoter	8982212	8983712	0	0	0	0	0	0	0	0	0	0	0	0	0	0	0	0	0	0	0	0	0	0	0	0	0	0	0	0	0	0	0	0	0	0	0	0	0	0
2.8986004.C_T.clim-gs10	2	8986004	C	T	0.0758483	.	clim-gs10	AT2G20880	promoter	8984958	8986458	0	0	0	0	0	0	0	0	0	0	0	0	0	0	0	0	0	0	0	0	0	0	0	0	0	0	0	0	0	0	0	0	0	0	0	0	0	0
2.10915026.C_T.Mo98	2	10915026	C	T	0.0347826	INTRON	Mo98	AT2G25640	terminator	10914047	10915547	0	0	0	0	0	0	0	0	0	0	0	0	0	0	0	0	0	0	0	0	0	0	0	0	0	0	0	0	0	0	0	0	0	0	0	0	0	0
2.10915048.C_G.Mo98	2	10915048	C	G	0.0347826	INTRON	Mo98	AT2G25640	terminator	10914047	10915547	0	0	0	0	0	0	0	0	0	0	0	0	0	0	0	0	0	0	0	0	0	0	0	0	0	0	0	0	0	0	0	0	0	0	0	0	0	0
2.8260134.G_T.clim-gs10	2	8260134	G	T	0.0459082	UTR_3_PRIME	clim-gs10	AT2G19060	terminator	8260045	8261545	0	0	0	0	0	0	0	0	0	0	0	0	0	0	0	0	0	0	0	0	0	0	0	0	0	0	0	0	0	0	0	0	0	0	0	0	0	0
2.8260135.A_G.clim-gs10	2	8260135	A	G	0.0459082	UTR_3_PRIME	clim-gs10	AT2G19060	terminator	8260045	8261545	0	0	0	0	0	0	0	0	0	0	0	0	0	0	0	0	0	0	0	0	0	0	0	0	0	0	0	0	0	0	0	0	0	0	0	0	0	0
2.8255533.A_C.clim-gs10	2	8255533	A	C	0.0459082	STOP_LOST	clim-gs10	AT2G19050	terminator	8255176	8256676	0	0	0	0	0	0	0	0	0	0	0	0	0	0	0	0	0	0	0	0	0	0	0	0	0	0	0	0	0	0	0	0	0	0	0	0	0	0
2.15706027.A_C.clim-gs10	2	15706027	A	C	0.0459082	INTERGENIC	clim-gs10	AT2G37430	promoter	15705284	15706784	0	0	0	0	0	0	0	0	0	0	0	0	0	0	0	0	0	0	0	0	0	0	0	0	0	0	0	0	0	0	0	0	0	0	0	0	0	0
2.15695217.T_A.clim-gs10	2	15695217	T	A	0.0459082	INTRON	clim-gs10	AT2G37400	terminator	15694987	15696487	0	0	0	0	0	0	0	0	0	0	0	0	0	0	0	0	0	0	0	0	0	0	0	0	0	0	0	0	0	0	0	0	0	0	0	0	0	0
2.13864994.A_G.clim-gs10	2	13864994	A	G	0.0638723	INTERGENIC	clim-gs10	AT2G32690	promoter	13864210	13865710	0	0	0	0	0	0	0	0	0	0	0	0	0	0	0	0	0	0	0	0	0	0	0	0	0	0	0	0	0	0	0	0	0	0	0	0	0	0
2.13857439.C_A.clim-gs10	2	13857439	C	A	0.0638723	INTERGENIC	clim-gs10	AT2G32670	promoter	13856876	13858376	0	0	0	0	0	0	0	0	0	0	0	0	0	0	0	0	0	0	0	0	0	0	0	0	0	0	0	-1	0	0	0	0	0	0	0	0	0	0
2.8116755.T_A.clim-gs10	2	8116755	T	A	0.0459082	NON_SYNONYMOUS_CODING	clim-gs10	AT2G18720	promoter	8116585	8118085	0	0	0	0	0	0	0	0	0	0	0	0	0	0	0	0	0	0	0	0	0	0	0	0	0	0	0	0	0	0	0	0	0	0	0	0	0	0
2.8202009.C_T.clim-gs10	2	8202009	C	T	0.0459082	INTERGENIC	clim-gs10	AT2G18938	promoter	8201215	8202715	0	0	0	0	0	0	0	0	0	0	0	0	0	0	0	0	0	0	0	0	0	0	0	0	0	0	0	0	0	0	0	0	0	0	0	0	0	0
2.8184123.G_A.clim-gs10	2	8184123	G	A	0.0459082	NON_SYNONYMOUS_CODING	clim-gs10	AT2G18890	promoter	8182637	8184137	0	0	0	0	0	0	0	0	0	0	0	0	0	0	0	0	0	0	0	0	0	0	0	0	0	0	0	0	0	0	0	0	0	0	0	0	0	0
2.8201404.G_A.clim-gs10	2	8201404	G	A	0.0459082	INTERGENIC	clim-gs10	AT2G18938	promoter	8201215	8202715	0	0	0	0	0	0	0	0	0	0	0	0	0	0	0	0	0	0	0	0	0	0	0	0	0	0	0	0	0	0	0	0	0	0	0	0	0	0
2.8201940.C_T.clim-gs10	2	8201940	C	T	0.0459082	INTERGENIC	clim-gs10	AT2G18938	promoter	8201215	8202715	0	0	0	0	0	0	0	0	0	0	0	0	0	0	0	0	0	0	0	0	0	0	0	0	0	0	0	0	0	0	0	0	0	0	0	0	0	0
2.7521000.T_G.clim-gs9	2	7521000	T	G	0.0179641	.	clim-gs9	AT2G06835	promoter	7520366	7521866	0	0	0	0	0	0	0	0	0	0	0	0	0	0	0	0	0	0	0	0	0	0	0	0	0	0	0	0	0	0	0	0	0	0	0	0	0	0
2.8264201.A_T.clim-gs10	2	8264201	A	T	0.0638723	INTRON	clim-gs10	AT2G19090	terminator	8263973	8265473	0	0	0	0	0	0	0	0	0	0	0	0	0	0	0	0	0	0	0	0	0	0	0	0	0	0	0	0	0	0	0	0	0	0	0	0	0	0
2.16556498.C_G.clim-gs10	2	16556498	C	G	0.0159681	INTERGENIC	clim-gs10	AT2G39705	promoter	16555800	16557300	0	0	0	0	0	0	0	0	0	0	0	0	0	0	0	0	0	0	0	0	0	0	0	0	0	0	0	0	0	0	0	0	0	0	0	0	0	0
2.16561684.C_T.clim-gs10	2	16561684	C	T	0.0159681	INTERGENIC	clim-gs10	AT2G39710	terminator	16560787	16562287	0	0	0	0	0	0	0	0	0	0	0	0	0	0	0	0	0	0	0	0	0	0	0	0	0	0	0	0	0	0	0	0	0	0	0	0	0	0
2.16556403.G_T.clim-gs10	2	16556403	G	T	0.0159681	INTERGENIC	clim-gs10	AT2G39705	promoter	16555800	16557300	0	0	0	0	0	0	0	0	0	0	0	0	0	0	0	0	0	0	0	0	0	0	0	0	0	0	0	0	0	0	0	0	0	0	0	0	0	0
2.16561917.A_C.clim-gs10	2	16561917	A	C	0.0159681	UTR_3_PRIME	clim-gs10	AT2G39710	terminator	16560787	16562287	0	0	0	0	0	0	0	0	0	0	0	0	0	0	0	0	0	0	0	0	0	0	0	0	0	0	0	0	0	0	0	0	0	0	0	0	0	0
2.16557819.C_G.clim-gs10	2	16557819	C	G	0.0159681	INTERGENIC	clim-gs10	AT2G39705	terminator	16557768	16559268	0	0	0	0	0	0	0	0	0	0	0	0	0	0	0	0	0	0	0	0	0	0	0	0	0	0	0	0	0	0	0	0	0	0	0	0	0	0
2.16558825.C_G.clim-gs10	2	16558825	C	G	0.0159681	INTERGENIC	clim-gs10	AT2G39705	terminator	16557768	16559268	0	0	0	0	0	0	0	0	0	0	0	0	0	0	0	0	0	0	0	0	0	0	0	0	0	0	0	0	0	-1	0	0	0	0	0	0	0	0
2.16560843.T_C.clim-gs10	2	16560843	T	C	0.0159681	INTERGENIC	clim-gs10	AT2G39710	terminator	16560787	16562287	0	0	0	0	0	0	0	0	0	0	0	0	0	0	0	0	0	0	0	0	0	0	0	0	0	0	0	0	0	0	0	0	0	0	0	0	0	0
2.16561926.A_T.clim-gs10	2	16561926	A	T	0.0159681	UTR_3_PRIME	clim-gs10	AT2G39710	terminator	16560787	16562287	0	0	0	0	0	0	0	0	0	0	0	0	0	0	0	0	0	0	0	0	0	0	0	0	0	0	0	0	0	0	0	0	0	0	0	0	0	0
2.19111500.A_T.clim-gs10	2	19111500	A	T	0.0558882	INTRON	clim-gs10	AT2G46540	promoter	19111337	19112837	0	0	0	0	0	0	0	0	0	0	0	0	0	0	0	0	0	0	0	0	0	0	0	0	0	0	0	0	0	0	0	0	0	0	0	0	0	0
2.19111504.G_T.clim-gs10	2	19111504	G	T	0.0558882	INTRON	clim-gs10	AT2G46540	promoter	19111337	19112837	0	0	0	0	0	0	0	0	0	0	0	0	0	0	0	0	0	0	0	0	0	0	0	0	0	0	0	0	0	0	0	0	0	0	0	0	0	0
2.19111516.A_G.clim-gs10	2	19111516	A	G	0.0558882	INTRON	clim-gs10	AT2G46540	promoter	19111337	19112837	0	0	0	0	0	0	0	0	0	0	0	0	0	0	0	0	0	0	0	0	0	0	0	0	0	0	0	0	1	0	0	0	0	0	0	0	0	0
2.19111702.A_G.clim-gs10	2	19111702	A	G	0.0558882	UTR_5_PRIME	clim-gs10	AT2G46540	promoter	19111337	19112837	0	0	0	0	0	0	0	0	0	0	0	0	0	0	0	0	0	0	0	0	0	0	0	0	0	0	0	0	0	0	0	0	0	0	0	0	0	0
2.19112825.C_T.clim-gs10	2	19112825	C	T	0.0558882	SYNONYMOUS_CODING	clim-gs10	AT2G46540	promoter	19111337	19112837	0	0	0	0	0	0	0	0	0	0	0	0	0	0	0	0	0	0	0	0	0	0	0	0	0	0	0	0	0	0	0	0	0	0	0	0	0	0
2.19113860.A_C.clim-gs10	2	19113860	A	C	0.0558882	INTRON	clim-gs10	AT2G46550	promoter	19113727	19115227	0	0	0	0	0	0	0	0	0	0	0	0	0	0	0	0	0	0	0	0	0	0	0	0	0	0	0	0	0	0	0	0	0	0	0	0	0	0
2.19111332.A_C.clim-gs10	2	19111332	A	C	0.0558882	INTRON	clim-gs10	AT2G46550	terminator	19110960	19112460	0	0	0	0	0	0	0	0	0	0	0	0	0	0	0	0	0	0	0	0	0	0	0	0	0	0	0	0	-1	0	0	0	0	0	0	0	0	0
2.19111517.C_A.clim-gs10	2	19111517	C	A	0.0558882	INTRON	clim-gs10	AT2G46540	promoter	19111337	19112837	0	0	0	0	0	0	0	0	0	0	0	0	0	0	0	0	0	0	0	0	0	0	0	0	0	0	0	0	0	0	0	0	0	0	0	0	0	0
2.19114343.A_G.clim-gs10	2	19114343	A	G	0.0558882	INTERGENIC	clim-gs10	AT2G46550	promoter	19113727	19115227	0	0	0	0	0	0	0	0	0	0	0	0	0	0	0	0	0	0	0	0	0	0	0	0	0	0	0	0	0	-1	0	0	0	0	0	0	0	0
2.15256745.A_C.clim-gs10	2	15256745	A	C	0.0538922	INTERGENIC	clim-gs10	AT2G36380	promoter	15256417	15257917	0	0	0	0	0	0	0	0	0	0	0	-1	0	0	0	0	0	0	0	0	0	0	0	0	0	0	0	0	0	0	0	0	0	0	0	0	0	0
2.6790940.C_T.clim-prec10	2	6790940	C	T	0.0139721	INTERGENIC	clim-prec10	AT2G15560	promoter	6789715	6791215	0	0	0	0	0	0	0	0	0	0	0	0	0	0	0	0	0	0	0	0	0	0	0	0	0	0	0	0	0	0	0	0	0	0	0	0	0	0
2.10293719.C_T.clim-gs10	2	10293719	C	T	0.0698603	INTERGENIC	clim-gs10	AT2G24210	promoter	10293285	10294785	0	0	0	0	0	0	0	0	0	0	0	0	0	0	0	0	0	0	0	0	0	0	0	0	0	0	0	0	0	0	0	0	0	0	0	0	0	0
2.3527109.G_T.YEL	2	3527109	G	T	0.0842105	INTRON	YEL	AT2G07690	promoter	3527000	3528500	0	0	0	0	0	0	0	0	0	0	0	0	0	0	0	0	0	0	0	0	0	0	0	0	0	0	0	0	0	0	0	0	0	0	0	0	0	0
2.3531921.C_T.YEL	2	3531921	C	T	0.0842105	INTERGENIC	YEL	AT2G05445	promoter	3531411	3532911	0	0	0	0	0	0	0	0	0	0	0	0	0	0	0	0	0	0	0	0	0	0	0	0	0	0	0	0	0	0	0	0	0	0	0	0	0	0
2.3593997.G_A.YEL	2	3593997	G	A	0.0842105	INTERGENIC	YEL	AT2G07810	promoter	3592729	3594229	0	0	0	0	0	0	0	0	0	0	0	0	0	0	0	0	0	0	0	0	0	0	0	0	0	0	0	0	0	0	0	0	0	0	0	0	0	0
2.3779475.C_G.YEL	2	3779475	C	G	0.0842105	INTERGENIC	YEL	AT2G09970	terminator	3778991	3780491	0	0	0	0	0	0	0	0	0	0	0	0	0	0	0	0	0	0	0	0	0	0	0	0	0	0	0	0	0	0	0	0	0	0	0	0	0	0
2.3779690.C_T.YEL	2	3779690	C	T	0.0842105	INTERGENIC	YEL	AT2G09970	terminator	3778991	3780491	0	0	0	0	0	0	0	0	0	0	0	0	0	0	0	0	0	0	0	0	0	0	0	0	0	0	0	0	0	0	0	0	0	0	0	0	0	0
2.3782202.G_C.YEL	2	3782202	G	C	0.0842105	INTERGENIC	YEL	AT2G09990	terminator	3781835	3783335	0	0	0	0	0	0	0	0	0	0	0	0	0	0	0	0	0	0	0	0	0	0	0	0	0	0	0	0	0	0	0	0	0	0	0	0	0	0
2.3532214.A_C.YEL	2	3532214	A	C	0.0842105	INTERGENIC	YEL	AT2G05445	promoter	3531411	3532911	0	0	0	0	0	0	0	0	0	0	0	0	0	0	0	0	0	0	0	0	0	0	0	0	0	0	0	0	0	0	0	0	0	0	0	0	0	0
2.3580684.G_A.YEL	2	3580684	G	A	0.0842105	INTERGENIC	YEL	AT2G07750	terminator	3580025	3581525	0	0	0	0	0	0	0	0	0	0	0	0	0	0	0	0	0	0	0	0	0	0	0	0	0	0	0	0	0	0	0	0	0	0	0	0	0	0
2.3779601.A_T.YEL	2	3779601	A	T	0.0842105	INTERGENIC	YEL	AT2G09970	terminator	3778991	3780491	0	0	0	0	0	0	0	0	0	0	0	0	0	0	0	0	0	0	0	0	0	0	0	0	0	0	0	0	0	0	0	0	0	0	0	0	0	0
2.3532745.A_C.YEL	2	3532745	A	C	0.0842105	INTERGENIC	YEL	AT2G05445	promoter	3531411	3532911	0	0	0	0	0	0	0	0	0	0	0	0	0	0	0	0	0	0	0	0	0	0	0	0	0	0	0	0	0	0	0	0	0	0	0	0	0	0
2.3528707.C_T.YEL	2	3528707	C	T	0.0842105	INTERGENIC	YEL	AT2G05425	promoter	3528124	3529624	0	0	0	0	0	0	0	0	0	0	0	0	0	0	0	0	0	0	0	0	0	0	0	0	-1	0	0	0	0	0	0	0	0	0	0	0	0	0
2.3580425.C_T.YEL	2	3580425	C	T	0.0842105	UTR_3_PRIME	YEL	AT2G07750	terminator	3580025	3581525	0	0	0	0	0	0	0	0	0	0	0	0	0	0	0	0	0	0	0	0	0	0	0	0	0	0	0	0	0	0	0	0	0	0	0	0	0	0
2.3593908.G_A.YEL	2	3593908	G	A	0.0842105	INTERGENIC	YEL	AT2G07810	promoter	3592729	3594229	0	0	0	0	0	0	0	0	0	0	0	0	0	0	0	0	0	0	0	0	0	0	0	0	0	0	0	0	0	0	0	0	0	0	0	0	0	0
2.3779692.G_A.YEL	2	3779692	G	A	0.0842105	INTERGENIC	YEL	AT2G09970	terminator	3778991	3780491	0	0	0	0	0	0	0	0	0	0	0	0	0	0	0	0	0	0	0	0	0	0	0	0	0	0	0	0	0	0	0	0	0	0	0	0	0	0
2.10949801.T_A.Mo98	2	10949801	T	A	0.026087	INTERGENIC	Mo98	AT2G25700	promoter	10949126	10950626	0	0	0	0	0	0	0	0	0	0	0	0	0	0	0	0	0	0	0	0	0	0	0	0	0	0	0	0	0	0	0	0	0	0	0	0	0	0
2.10951667.C_T.Mo98	2	10951667	C	T	0.026087	INTERGENIC	Mo98	AT2G25710	promoter	10951546	10953046	0	0	0	0	0	0	0	0	0	0	0	0	0	0	0	0	0	0	0	0	0	0	0	0	1	0	0	0	0	0	0	0	0	0	0	0	0	0
[truncated: 5,366 more rows]
[truncated: 8 more columns]
